# Supplementary material
Source: publisher figshare collection journal article supplement (https://acs.figshare.com/ndownloader/files/3787630)
Supplement: Supplementary file 1 [file 3787630]

## Sheet: Osmotic Shock
EtOH_R1	EtOH_R2	EtOH_R3	EtOH_R4	PBS_R1	PBS_R2	PBS_R3	PBS_R4	TCA_R1	TCA_R2	TCA_R3	TCA_R4	Amino acid	Sign_EtOH	Sign_PBS	Sign_TCA	Localization prob	Score	Position	pValue_EtOH	pValue_PBS	pValue_TCA	DifferenceEtOH	DifferencePBS	DifferenceTCA	Sequence window	Modified sequence	Uniprot	SGD_ID	ORF	Gene	Name	Description
2.14022	2.09454	1.99839	2.12526	0.123004	-0.118696	0.812663	1.14631	1.71224	1.73218	1.58273	1.81117	S	+		+	0.999999	161.24	25	5.10745	0.712049	4.32982	2.0896	0.49082	1.70958	NIKKKAMDNGLSLPISRNGSSNNIKDKRSEH	_AMDNGLSLPIS(ph)R_	P23642	S000004583	YML115C	VAN1	VANadate resistance protein	Component of the mannan polymerase I; complex contains Van1p and Mnn9p and is involved in the first steps of mannan synthesis; mutants are vanadate-resistant
2.49129	2.47649	2.35572	2.63621	0.0182068	-0.0150826	0.270817	0.482392	2.41784	2.22605	2.24352	2.62353	S	+		+	0.999953	141.08	475	4.56825	0.690811	3.88661	2.48993	0.189083	2.37774	IVTPTIQRPDVTRSNSYDGFRTVFDSSLKNI	_SNS(ph)YDGFR_	Q02866	S000005991	YPL070W	MUK1	coMpUtationally-linked to Kap95	Guanine nucleotide exchange factor (GEF); involved in vesicle-mediated vacuolar transport, including Golgi-endosome trafficking and sorting through the multivesicular body (MVB); specifically stimulates the intrinsic guanine nucleotide exchange activity of Rab family members (Vps21p/Ypt52p/Ypt53p); partially redundant with GEF VPS9; required for localization of the CORVET complex to endosomes; co…
3.65444	3.70321	3.61658	3.98063	-0.591658	-0.787144	-0.549817	-0.396159	3.79098	3.5373	4.06854	4.39508	S	+		+	0.999992	161.51	197	4.62509	2.26144	3.65224	3.73871	-0.581195	3.94797	MIKNNSNRPHLAKGESYQSAEQEIDHTAPEK	_GES(ph)YQSAEQEIDHTAPEKSEK_	Q06146	S000004247	YLR257W	YLR257W		Protein of unknown function; protein abundance increases in response to DNA replication stress
1.43381	1.38692	1.44152	1.66159	1.09112	1.04796	0.47307	1.04788	1.44467	1.28907	1.34699	1.41492	T	+		+	1	104.59	820	3.80619	2.07227	4.44316	1.48096	0.915007	1.37391	PNTNPSPLKTQTKNGTPNPNNMKTVQSPMGA	_NGT(ph)PNPNNM(ox)K_	P19659	S000005411	YOL051W	GAL11	GALactose metabolism	Subunit of the RNA polymerase II mediator complex; associates with core polymerase subunits to form the RNA polymerase II holoenzyme; affects transcription by acting as target of activators and repressors; forms part of the tail domain of mediator
0.962586	0.811635	0.857626	1.27115	0.797511	1.02892	-0.162983	0.442595	1.09126	0.990882	1.10768	0.991714	S			+	0.999207	191.07	248	2.59816	0.868004	4.22472	0.975749	0.526511	1.04538	KMPTKTAQQPQQFAPSPSNKKHIETLSNSKV	_TAQQPQQFAPS(ph)PSNKK_	P08018	S000003664	YJL128C	PBS2	Polymyxin B Sensitivity	MAP kinase kinase of the HOG signaling pathway; activated under severe osmotic stress; mitophagy-specific regulator; plays a role in regulating Ty1 transposition
-0.322596	-0.322776	0.057707	0.996542	0.532666	0.411426	0.399178	0.462893	1.80248	1.80091	NaN	NaN	S			+	0.998091	141.23	50	0.116781	3.18071	3.55624	0.102219	0.451541	1.8017	DEVGGTLSRRASSIFSINTTPLAPPNATDIQ	_RAS(ph)S(ph)IFS(ph)INTTPLAPPNATDIQK_	P08456	S000000828	YER026C	CHO1	CHOline requiring	Phosphatidylserine synthase; functions in phospholipid biosynthesis; catalyzes the reaction CDP-diaclyglycerol + L-serine = CMP + L-1-phosphatidylserine, transcriptionally repressed by myo-inositol and choline
NaN	NaN	1.24859	1.8715	-0.51132	-1.09086	0.480176	0.397847	2.31803	2.0898	2.27063	2.33723	S			+	0.980256	171.71	241	0.901535	0.177675	4.46092	1.56004	-0.18104	2.25392	PSTLRRKVSSLVRGSSVHDINNGIADKQIRP	_GSS(ph)VHDINNGIADK_	P08678	S000003542	YJL005W	CYR1	CYclic AMP Requirement	Adenylate cyclase; required for cAMP production and cAMP-dependent protein kinase signaling; the cAMP pathway controls a variety of cellular processes, including metabolism, cell cycle, stress response, stationary phase, and sporulation
NaN	NaN	1.9005	2.25133	NaN	NaN	NaN	NaN	3.72028	3.35558	3.1556	3.27635	S			+	1	156.17	507	1.27029	0	3.98929	2.07592	NaN	3.37695	QSQQFGARYQPQQQPSAALRTPEQHPNDDNS	_YQPQQQPS(ph)AALR_	P23291	S000001177	YHR135C	YCK1	Yeast Casein Kinase I homologue	Palmitoylated plasma membrane-bound casein kinase I (CK1) isoform; shares redundant functions with Yck2p in morphogenesis, proper septin assembly, endocytic trafficking, and glucose sensing; stabilized by Sod1p binding in the presence of glucose and oxygen, causing glucose repression of respiratory metabolism; YCK1 has a paralog, YCK2, that arose from the whole genome duplication
2.54767	2.80463	1.13429	1.65936	0.356482	0.106616	0.931095	0.731973	2.94169	2.9062	2.31567	2.76474	S			+	1	153.79	257	1.87037	1.19421	3.49554	2.03649	0.531542	2.73207	NNTPTSRPPMKSQAYSCPFILKRSPPQAYSS	_SQAYS(ph)CPFILK_	P32047	S000005018	YNL074C	MLF3	Multicopy suppressor of LeFlunomide sensitivity	Serine-rich protein of unknown function; predicted to be palmitoylated; overproduction suppresses growth inhibition caused by exposure to immunosuppressant leflunomide; MLF3 has a paralog, VHS2, that arose from the whole genome duplication
-0.811042	-0.758135	NaN	NaN	-0.185195	-0.559175	0.237133	0.274145	-0.97889	-1.10768	-0.997979	-0.923796	S			+	0.999995	82.85	42	1.66845	0.104319	3.90345	-0.784589	-0.0582732	-1.00209	TQVPVSILTNKERRKSIHDESNFERSDSHED	_RKS(ph)IHDESNFER_	P36076	S000001571	YKL088W	CAB3	Coenzyme A Biosynthesis	Subunit of PPCDC and CoA-SPC complexes involved in CoA biosynthesis; subunits of the phosphopantothenoylcysteine decarboxylase (PPCDC) complex are: Cab3p, Sis2p, Vhs3p, while the subunits of the CoA-synthesizing protein complex (CoA-SPC) are: Cab2p, Cab3p, Cab4p, and Cab5p as well as Sis2p and Vhs3p; null mutant lethality is complemented by E. coli coaBC
NaN	NaN	NaN	NaN	NaN	NaN	NaN	NaN	4.32236	3.90824	3.4727	3.74225	S			+	0.999361	162.43	476	0	0	3.66922	NaN	NaN	3.86139	MVNPGQLPPSLEKKLSSPDTESKLGPQDQSQ	_KLS(ph)SPDTESKLGPQDQSQAK_	P40563	S000001442	YIR003W	AIM21	Altered Inheritance rate of Mitochondria	Protein of unknown function; involved in mitochondrial migration along actin filament; may interact with ribosomes; GFP-fusion protein colocalizes with Sac1p to the actin cytoskeleton
2.69046	3.02931	2.24612	2.58459	-0.235535	-0.454763	1.58355	1.25801	2.02173	2.14825	2.29364	2.34755	S			+	0.995997	121.68	158	3.3029	0.427226	4.08693	2.63762	0.537816	2.20279	MDTSGNAIFLSKRSLSSPVFNKIIRRKTHSS	_SLS(ph)SPVFNK_	P53244	S000003300	YGR068C	ART5	Arrestin-Related Trafficking adaptors	Protein proposed to regulate endocytosis of plasma membrane proteins; regulates by recruiting the ubiquitin ligase Rsp5p to its target in the plasma membrane
0.591967	0.533065	0.529927	0.636257	0.169027	0.18916	-0.622462	-0.503654	0.770533	0.70779	0.619803	0.777591	S			+	0.999957	148.52	42	3.71334	0.357622	3.541	0.572804	-0.191982	0.718929	DSSVNKMHRASVSAMSPPLCRSYMSGFFTGG	_AS(ph)VSAMS(ph)PPLCR_	P53273	S000003357	YGR125W	YGR125W		Putative protein of unknown function; deletion mutant has decreased rapamycin resistance but normal wormannin resistance; green fluorescent protein (GFP)-fusion protein localizes to the vacuole
1.32291	1.35705	NaN	NaN	0.969528	1.01307	0.834982	0.900314	1.63483	1.54092	1.54608	1.51503	S			+	0.880719	136.02	54	2.09105	3.78656	4.98557	1.33998	0.929473	1.55921	SLGRNSNTTQARVASSPISPGLHSTQYFRSP	_VASS(ph)PIS(ph)PGLHSTQYFR_	P53599	S000005314	YNR031C	SSK2	Suppressor of Sensor Kinase	MAP kinase kinase kinase of HOG1 mitogen-activated signaling pathway; interacts with Ssk1p, leading to autophosphorylation and activation of Ssk2p which phosphorylates Pbs2p; also mediates actin cytoskeleton recovery from osmotic stress; a HOG-independent function of Ssk2p mediates the calcium-sensitive phenotype of the ptp2 msg5 double disruptant; SSK2 has a paralog, SSK22, that arose from the w…
1.19516	1.07622	NaN	NaN	1.51586	1.10548	0.834982	0.900314	1.63483	1.54092	1.54608	1.51503	S			+	0.996415	136.02	57	1.47747	2.23999	4.98557	1.13569	1.08916	1.55921	RNSNTTQARVASSPISPGLHSTQYFRSPNAV	_VASS(ph)PIS(ph)PGLHSTQYFR_	P53599	S000005314	YNR031C	SSK2	Suppressor of Sensor Kinase	MAP kinase kinase kinase of HOG1 mitogen-activated signaling pathway; interacts with Ssk1p, leading to autophosphorylation and activation of Ssk2p which phosphorylates Pbs2p; also mediates actin cytoskeleton recovery from osmotic stress; a HOG-independent function of Ssk2p mediates the calcium-sensitive phenotype of the ptp2 msg5 double disruptant; SSK2 has a paralog, SSK22, that arose from the w…
3.09038	3.06393	2.19284	2.39487	2.7006	2.71348	2.31948	2.45854	3.16654	3.01997	2.79746	2.72977	S			+	0.811478	122.64	175	2.87026	3.92878	4.04915	2.68551	2.54802	2.92844	EKELMAMRKNLHHRKSSPDAVDSVGKNDGAA	_KS(ph)SPDAVDSVGK_	P53629	S000005302	YNR019W	ARE2	Acyl-coenzyme A: cholesterol acyl transferase-Related Enzyme	Acyl-CoA:sterol acyltransferase; endoplasmic reticulum enzyme that contributes the major sterol esterification activity in the presence of oxygen; ARE2 has a paralog, ARE1, that arose from the whole genome duplication
NaN	NaN	NaN	NaN	NaN	NaN	NaN	NaN	2.25804	2.1334	2.39585	2.37124	S			+	0.884146	55.196	265	0	0	4.4002	NaN	NaN	2.28963	IREQKQQPHHNNSTDSTLPKGSLQQEKEALN	_QQPHHNNSTDS(ph)T(ph)LPK_	P53879	S000005124	YNL180C	RHO5	Ras HOmolog	Non-essential small GTPase of the Rho/Rac family of Ras-like proteins; regulated by phosphorylation and ubiquitination; likely involved in protein kinase C (Pkc1p)-dependent signal transduction pathway that controls cell integrity
NaN	NaN	NaN	NaN	NaN	NaN	NaN	NaN	NaN	NaN	3.20423	3.20729	S			+	0.989685	108.14	513	0	0	3.51714	NaN	NaN	3.20576	REVIQKKVSKNRASVSSPSISTTSRGKDNRS	_ASVS(ph)SPSISTTSR_	Q03407	S000002898	YDR490C	PKH1	Pkb-activating Kinase Homolog	Serine/threonine protein kinase; involved in sphingolipid-mediated signaling pathway that controls endocytosis; activates Ypk1p and Ykr2p, components of signaling cascade required for maintenance of cell wall integrity; redundant with Pkh2p; PKH1 has a paralog, PKH2, that arose from the whole genome duplication
2.13668	2.30214	NaN	NaN	0.0253123	-0.761286	NaN	NaN	2.18152	2.27724	2.55699	2.47497	S			+	0.976501	104.45	16	1.6249	0.283029	3.97112	2.21941	-0.367987	2.37268	MPAKKRTRKTVKKTVSFSDDTTLTTHQNREK	_TVS(ph)FSDDTTLTTHQNR_	Q06636	S000002710	YDR302W	GPI11	GlycosylPhosphatidylInositol anchor biosynthesis	ER membrane protein involved in a late step of GPI anchor assembly; involved in the addition of phosphoethanolamine to the multiply mannosylated glycosylphosphatidylinositol (GPI) intermediate; human PIG-Fp is a functional homolog
NaN	NaN	NaN	NaN	NaN	NaN	NaN	NaN	NaN	NaN	-2.18403	-2.18171	S			+	0.839771	81.003	118	0	0	3.47081	NaN	NaN	-2.18287	RYSDERPRPKKKLSSSMPNSPKKPVDSLTKA	_LSSS(ph)MPNS(ph)PKKPVDSLTK_	Q07533	S000002275	YDL117W	CYK3	CYtoKinesis	SH3-domain protein located in the bud neck and cytokinetic actin ring; relocalizes from bud neck to nucleus upon DNA replication stress; activates the chitin synthase activity of Chs2p during cytokinesis; suppressor of growth and cytokinesis defects of chs2 phospho-mutants
NaN	NaN	NaN	NaN	NaN	NaN	NaN	NaN	NaN	NaN	-2.18403	-2.18171	S			+	0.999943	171.78	122	0	0	3.47081	NaN	NaN	-2.18287	ERPRPKKKLSSSMPNSPKKPVDSLTKARKAK	_LS(ph)SSMPNS(ph)PKKPVDSLTK_	Q07533	S000002275	YDL117W	CYK3	CYtoKinesis	SH3-domain protein located in the bud neck and cytokinetic actin ring; relocalizes from bud neck to nucleus upon DNA replication stress; activates the chitin synthase activity of Chs2p during cytokinesis; suppressor of growth and cytokinesis defects of chs2 phospho-mutants
2.55577	2.39303	1.34465	1.72418	NaN	NaN	0.893303	0.840758	2.52391	2.1811	2.25815	2.13587	S			+	0.999974	108.35	139	2.23244	1.71479	3.91402	2.00441	0.867031	2.27476	AELKRFFRPSVNKKLSMSQLRSKKHSTHSPP	_KLS(ph)MSQLR_	Q08732	S000005793	YOR267C	HRK1	Hygromycin Resistance Kinase	Protein kinase; implicated in activation of the plasma membrane H(+)-ATPase Pma1p in response to glucose metabolism; plays a role in ion homeostasis; protein abundance increases in response to DNA replication stress
0.96066	0.881978	1.69008	1.2596	0.151599	-0.11904	NaN	NaN	1.40773	1.46148	1.44693	1.18338	S			+	1	144.27	37	2.13955	0.034432	3.63935	1.19808	0.0162794	1.37488	ENSSNNPPQLIRSSKSFLNFIGRKQSNDSLR	_S(ph)FLNFIGR_	Q08732	S000005793	YOR267C	HRK1	Hygromycin Resistance Kinase	Protein kinase; implicated in activation of the plasma membrane H(+)-ATPase Pma1p in response to glucose metabolism; plays a role in ion homeostasis; protein abundance increases in response to DNA replication stress
1.79044	1.84326	2.01432	2.33541	NaN	NaN	NaN	NaN	2.10538	2.25547	2.02997	2.2856	S			+	0.999998	146.15	1619	3.29464	0	4.31357	1.99586	NaN	2.1691	KLIKRPSLKTQSSKDSIGGNITTKLTKKLKL	_TQSS(ph)KDS(ph)IGGNITTK_	Q12674	S000004772	YMR162C	DNF3	Drs2 Neo1 Family	Trans-golgi network aminophospholipid translocase (flippase); maintains membrane lipid asymmetry in post-Golgi secretory vesicles; localizes to the trans-Golgi network; likely involved in protein transport; type 4 P-type ATPase
NaN	NaN	NaN	NaN	NaN	NaN	NaN	NaN	2.25804	2.1334	2.39585	2.37124	T			+	0.884146	55.196	266	0	0	4.4002	NaN	NaN	2.28963	REQKQQPHHNNSTDSTLPKGSLQQEKEALNI	_QQPHHNNSTDS(ph)T(ph)LPK_	P53879	S000005124	YNL180C	RHO5	Ras HOmolog	Non-essential small GTPase of the Rho/Rac family of Ras-like proteins; regulated by phosphorylation and ubiquitination; likely involved in protein kinase C (Pkc1p)-dependent signal transduction pathway that controls cell integrity
2.56762	2.48375	0.561728	1.24325	NaN	NaN	NaN	NaN	2.36421	2.01667	2.33723	2.01281	T			+	0.999909	104.91	203	1.40506	0	3.71432	1.71409	NaN	2.18273	STVNSNKSSTDIRRATPVSTPVISKPSMTTT	_RAT(ph)PVST(ph)PVISKPSMTTTPR_	Q03497	S000000999	YHL007C	STE20	STErile	Cdc42p-activated signal transducing kinase; involved in pheromone response, pseudohyphal/invasive growth, vacuole inheritance, down-regulation of sterol uptake; GBB motif binds Ste4p; member of the PAK (p21-activated kinase) family
2.56762	2.48375	0.561728	1.24325	NaN	NaN	NaN	NaN	2.36421	2.01667	2.21853	2.17723	T			+	0.951748	104.91	207	1.40506	0	4.11959	1.71409	NaN	2.19416	SNKSSTDIRRATPVSTPVISKPSMTTTPRQI	_RAT(ph)PVST(ph)PVISKPSMTTTPR_	Q03497	S000000999	YHL007C	STE20	STErile	Cdc42p-activated signal transducing kinase; involved in pheromone response, pseudohyphal/invasive growth, vacuole inheritance, down-regulation of sterol uptake; GBB motif binds Ste4p; member of the PAK (p21-activated kinase) family
0.964288	1.00447	1.00848	0.88188	0.753433	1.07485	-0.304861	0.365444	NaN	NaN	1.12102	1.02078	S	+			0.8392	153.06	250	4.20716	0.677981	1.52619	0.964778	0.472216	1.0709	PTKTAQQPQQFAPSPSNKKHIETLSNSKVVE	_TAQQPQQFAPSPS(ph)NKK_	P08018	S000003664	YJL128C	PBS2	Polymyxin B Sensitivity	MAP kinase kinase of the HOG signaling pathway; activated under severe osmotic stress; mitophagy-specific regulator; plays a role in regulating Ty1 transposition
0.466131	0.466236	NaN	NaN	0.674099	0.514097	NaN	NaN	0.472696	0.226755	-0.390558	0.185605	S	+			0.999066	96.903	409	4.14677	1.06949	0.261853	0.466183	0.594098	0.123625	KSKTARAHNVSTSNNSPSTDNDSISKSTTEP	_AHNVS(ph)TSNNS(ph)PSTDNDSISK_	P0C2J0	S000007364	YPR158W-B	YPR158W-B		Retrotransposon TYA Gag and TYB Pol genes; transcribed/translated as one unit; polyprotein is processed to make a nucleocapsid-like protein (Gag), reverse transcriptase (RT), protease (PR), and integrase (IN); similar to retroviral genes
1.76481	1.86037	1.77453	1.68497	-0.141971	-0.344941	-0.0697021	0.0306193	1.91613	1.71444	2.51986	2.37497	S	+			0.978212	60.628	790	4.73781	0.706589	2.82264	1.77117	-0.131499	2.13135	RQDLKISPPVMKRIVSTPQIQQQKEEQKKQS	_IVS(ph)TPQIQQQKEEQKK_	P47061	S000003566	YJL029C	VPS53	Vacuolar Protein Sorting	Component of the GARP (Golgi-associated retrograde protein) complex; GARP is required for the recycling of proteins from endosomes to the late Golgi, and for mitosis after DNA damage induced checkpoint arrest; required for vacuolar protein sorting; members of the GARP complex are Vps51p-Vps52p-Vps53p-Vps54p,
-0.538995	-0.538807	NaN	NaN	NaN	NaN	NaN	NaN	NaN	NaN	NaN	NaN	S	+			0.996044	106.94	48	3.95301	0	0	-0.538901	NaN	NaN	QSTVLNSNPFYSRKYSMSTLTPRDICRSVDS	_KYS(ph)MS(ph)TLT(ph)PR_	P50944	S000005045	YNL101W	AVT4	Amino acid Vacuolar Transport	Vacuolar transporter; exports large neutral amino acids from the vacuole; member of a family of seven S. cerevisiae genes (AVT1-7) related to vesicular GABA-glycine transporters
0.573084	0.603597	0.539037	0.636257	0.0565835	-0.293589	NaN	NaN	0.723078	0.778377	NaN	NaN	S	+			0.997136	107.65	87	4.01239	0.206762	1.63011	0.587994	-0.118503	0.750727	NFEAMAKQQASTRRTSNSYSPLRYVNPTLST	_RTS(ph)NSY(ph)SPLR_	Q08484	S000005596	YOR070C	GYP1	Gtpase-activating protein for YPt1p	Cis-golgi GTPase-activating protein (GAP) for yeast Rabs; the Rab family members are Ypt1p (in vivo) and for Ypt1p, Sec4p, Ypt7p, and Ypt51p (in vitro); involved in vesicle docking and fusion
2.54888	2.59158	2.47915	2.68168	NaN	NaN	NaN	NaN	NaN	NaN	NaN	NaN	T	+			0.965429	99.069	1608	5.00883	0	0	2.57532	NaN	NaN	LTPQTEERPPISRSGTGISMTHDKSTRPNIR	_SGT(ph)GISMT(ph)HDK_	P34756	S000001915	YFR019W	FAB1	Forms Aploid and Binucleate cells	1-phosphatidylinositol-3-phosphate 5-kinase; vacuolar membrane kinase that generates phosphatidylinositol (3,5)P2, which is involved in vacuolar sorting and homeostasis
1.72705	1.72692	NaN	NaN	NaN	NaN	NaN	NaN	NaN	NaN	NaN	NaN	T	+			0.925862	153.65	181	4.61792	0	0	1.72698	NaN	NaN	PESKLKETSDSTSTSTPTPTPSTNDSKASSE	_LKETSDSTSTST(ph)PTPTPSTNDSK_	P39935	S000003394	YGR162W	TIF4631	Translation Initiation Factor	Translation initiation factor eIF4G; subunit of the mRNA cap-binding protein complex (eIF4F) that also contains eIF4E (Cdc33p); interacts with Pab1p and with eIF4A (Tif1p); also has a role in biogenesis of the large ribosomal subunit; TIF4631 has a paralog, TIF4632, that arose from the whole genome duplication
-0.538995	-0.538807	NaN	NaN	NaN	NaN	NaN	NaN	NaN	NaN	NaN	NaN	T	+			0.999426	106.94	53	3.95301	0	0	-0.538901	NaN	NaN	NSNPFYSRKYSMSTLTPRDICRSVDSRVFVD	_KYS(ph)MS(ph)TLT(ph)PR_	P50944	S000005045	YNL101W	AVT4	Amino acid Vacuolar Transport	Vacuolar transporter; exports large neutral amino acids from the vacuole; member of a family of seven S. cerevisiae genes (AVT1-7) related to vesicular GABA-glycine transporters
NaN	NaN	-1.73881	0.0149223	NaN	NaN	-1.75945	-0.66948	NaN	NaN	NaN	NaN	S				0.962862	177.64	331	0.29631	0.571003	0	-0.861944	-1.21447	NaN	TDRFYPGTLSSFQTDSINNDAKSSLRSRLYD	_FYPGTLSSFQTDS(ph)INNDAK_	D6VTK4	S000001868	YFL026W	STE2	STErile	Receptor for alpha-factor pheromone; seven transmembrane-domain GPCR that interacts with both pheromone and a heterotrimeric G protein to initiate the signaling response that leads to mating between haploid a and alpha cells
NaN	NaN	NaN	NaN	-1.04698	-1.32934	0.762828	0.00544923	-0.941309	-1.29392	0.18146	-0.764941	S				1	117.29	15	0	0.33139	0.953127	NaN	-0.402011	-0.704679	_MSYTDNPPQTKRALSLDDLVNHDENEKVKL	_ALS(ph)LDDLVNHDENEKVK_	O13297	S000006149	YPL228W	CET1	Capping Enzyme Triphosphatase	RNA 5'-triphosphatase involved in mRNA 5' capping; subunit of the mRNA capping enzyme, which is a heterotetramer composed of a Cet1p homodimer and two molecules of the guanylyltransferase Ceg1p; Cet1p also has a role in regulation of RNA pol II pausing at promoter-proximal sites; interaction between Cet1p and Ceg1p is required for Ceg1p nuclear import; mammalian enzyme is a single bifunctional po…
-0.129781	-0.550761	NaN	NaN	NaN	NaN	NaN	NaN	NaN	NaN	NaN	NaN	S				0.996875	135.66	124	0.452626	0	0	-0.340271	NaN	NaN	DFDYDKQHRNLLSNGSPPMNDGSDANAKLEK	_NLLSNGS(ph)PPMNDGSDANAK_	O13297	S000006149	YPL228W	CET1	Capping Enzyme Triphosphatase	RNA 5'-triphosphatase involved in mRNA 5' capping; subunit of the mRNA capping enzyme, which is a heterotetramer composed of a Cet1p homodimer and two molecules of the guanylyltransferase Ceg1p; Cet1p also has a role in regulation of RNA pol II pausing at promoter-proximal sites; interaction between Cet1p and Ceg1p is required for Ceg1p nuclear import; mammalian enzyme is a single bifunctional po…
0.0878702	-0.143803	NaN	NaN	0.0277203	-0.0975328	0.0212186	0.0443896	0.0154976	0.207018	NaN	NaN	S				1	284.21	184	0.0709967	0.0104378	0.344448	-0.0279664	-0.00105107	0.111258	PGRVARRNAARKAEASGEAADEADEADEE__	_KAEAS(ph)GEAADEADEADEE_	O13516	S000006002	YPL081W	RPS9A	Ribosomal Protein of the Small subunit	Protein component of the small (40S) ribosomal subunit; homologous to mammalian ribosomal protein S9 and bacterial S4; RPS9A has a paralog, RPS9B, that arose from the whole genome duplication
0.550507	0.637657	0.686452	0.046772	NaN	NaN	-0.748204	-0.222557	NaN	NaN	NaN	NaN	S				0.883941	217.71	133	1.3275	0.500395	0	0.480347	-0.48538	NaN	DKEIYNKMIGVLNNSSESDEEESNDEKQKAQ	_MIGVLNNSS(ph)ESDEEESNDEK_	O13563	S000004413	YLR421C	RPN13	Regulatory Particle Non-ATPase	Subunit of the 19S regulatory particle of the 26S proteasome lid; acts as a ubiquitin receptor for the proteasome; null mutants accumulate ubiquitinated Gcn4p and display decreased 26S proteasome stability; protein abundance increases in response to DNA replication stress
0.51662	0.584385	-0.482642	-0.0861043	0.457647	0.585828	-0.560519	0.0544822	0.333882	0.636358	-0.140255	-0.206768	S				0.999016	231.44	135	0.1956	0.194989	0.306719	0.133065	0.134359	0.155804	EIYNKMIGVLNNSSESDEEESNDEKQKAQDV	_M(ox)IGVLNNSSES(ph)DEEESNDEKQK_	O13563	S000004413	YLR421C	RPN13	Regulatory Particle Non-ATPase	Subunit of the 19S regulatory particle of the 26S proteasome lid; acts as a ubiquitin receptor for the proteasome; null mutants accumulate ubiquitinated Gcn4p and display decreased 26S proteasome stability; protein abundance increases in response to DNA replication stress
-0.591049	-0.643338	NaN	NaN	-0.530072	-0.571064	0.638366	0.0329938	-0.819827	-0.752316	0.863756	-0.062398	S				1	149.95	140	1.56942	0.136327	0.182852	-0.617193	-0.107444	-0.192696	MIGVLNNSSESDEEESNDEKQKAQDVDVSMQ	_MIGVLNNSSES(ph)DEEES(ph)NDEKQK_	O13563	S000004413	YLR421C	RPN13	Regulatory Particle Non-ATPase	Subunit of the 19S regulatory particle of the 26S proteasome lid; acts as a ubiquitin receptor for the proteasome; null mutants accumulate ubiquitinated Gcn4p and display decreased 26S proteasome stability; protein abundance increases in response to DNA replication stress
-0.195153	-0.21922	0.98922	0.573982	-0.00511617	-0.203435	0.507091	0.211765	0.0930192	-0.0153596	0.699818	0.632159	S				1	125.22	143	0.391506	0.333793	0.824898	0.287207	0.127576	0.352409	LERALGVKLRGNNIGSPLGAPKKK_______	_LRGNNIGS(ph)PLGAPK_	O14467	S000007253	YOR298C-A	MBF1	Multiprotein Bridging Factor	Transcriptional coactivator; bridges the DNA-binding region of Gcn4p and TATA-binding protein Spt15p; suppressor of frameshift mutations; protein abundance increases in response to DNA replication stress
NaN	NaN	NaN	NaN	0.0625362	-0.349327	NaN	NaN	NaN	NaN	3.69098	2.6398	S				0.868885	71.781	2	0	0.212701	0.979846	NaN	-0.143396	3.16539	______________MSDWDTNTIIGSRARAG	_(ac)S(ph)DWDTNTIIGSR_	O14467	S000007253	YOR298C-A	MBF1	Multiprotein Bridging Factor	Transcriptional coactivator; bridges the DNA-binding region of Gcn4p and TATA-binding protein Spt15p; suppressor of frameshift mutations; protein abundance increases in response to DNA replication stress
0.0350608	-0.148257	NaN	NaN	-0.196955	-0.336737	1.04264	0.832616	-0.813499	-1.41235	2.39183	0.738626	S				1	175.93	12	0.188535	0.386809	0.092617	-0.0565981	0.33539	0.226153	____MSTDVAAAQAQSKIDLTKKKNEEINKK	_(ac)STDVAAAQAQS(ph)KIDLTK_	O94742	S000007235	YDR363W-A	SEM1	Suppressor of Exocyst Mutations	Component of lid subcomplex of 26S proteasome regulatory subunit; involved in mRNA export mediated by TREX-2 complex (Sac3p-Thp1p); assumes different conformations in different contexts, functions as molecular glue stabilizing the Rpn3p/Rpn7p regulatory heterodimer, and tethers it to lid helical bundle; ortholog of human DSS1; protein abundance increases in response to DNA replication stress
0.0443242	-0.0420705	NaN	NaN	NaN	NaN	-0.0532504	0.0276602	NaN	NaN	NaN	NaN	S				0.880955	132.13	146	0.00727122	0.09421	0	0.00112686	-0.0127951	NaN	MGVNEEKYTSDLKIVSNASCTTNCLAPLAKV;VGVNHTKYTPDKKIVSNASCTTNCLAPLAKV	_IVS(ph)NASCTTNCLAPLAK_	P00358	S000003769	YJR009C	TDH2	Triose-phosphate DeHydrogenase	Glyceraldehyde-3-phosphate dehydrogenase (GAPDH), isozyme 2; involved in glycolysis and gluconeogenesis; tetramer that catalyzes reaction of glyceraldehyde-3-phosphate to 1,3 bis-phosphoglycerate; detected in cytoplasm and cell wall; protein abundance increases in response to DNA replication stress; GAPDH-derived antimicrobial peptides are active against a wide variety of wine-related yeasts and …
NaN	NaN	-0.0732718	-0.334568	-0.116692	0.15549	NaN	NaN	0.209141	0.140386	0.27228	0.0548418	S				0.991156	130.05	149	0.440399	0.0410253	1.44232	-0.20392	0.0193991	0.169162	NEEKYTSDLKIVSNASCTTNCLAPLAKVIND;NHTKYTPDKKIVSNASCTTNCLAPLAKVIND	_IVSNAS(ph)CTTNCLAPLAK_	P00358	S000003769	YJR009C	TDH2	Triose-phosphate DeHydrogenase	Glyceraldehyde-3-phosphate dehydrogenase (GAPDH), isozyme 2; involved in glycolysis and gluconeogenesis; tetramer that catalyzes reaction of glyceraldehyde-3-phosphate to 1,3 bis-phosphoglycerate; detected in cytoplasm and cell wall; protein abundance increases in response to DNA replication stress; GAPDH-derived antimicrobial peptides are active against a wide variety of wine-related yeasts and …
0.816231	0.67735	-0.509949	0.247714	NaN	NaN	-0.529171	0.224081	NaN	NaN	-0.479438	0.34463	S				0.939985	160.47	201	0.422605	0.122049	0.0473185	0.307837	-0.152545	-0.0674038	VDGPSHKDWRGGRTASGNIIPSSTGAAKAVG	_TAS(ph)GNIIPSSTGAAK_	P00358	S000003769	YJR009C	TDH2	Triose-phosphate DeHydrogenase	Glyceraldehyde-3-phosphate dehydrogenase (GAPDH), isozyme 2; involved in glycolysis and gluconeogenesis; tetramer that catalyzes reaction of glyceraldehyde-3-phosphate to 1,3 bis-phosphoglycerate; detected in cytoplasm and cell wall; protein abundance increases in response to DNA replication stress; GAPDH-derived antimicrobial peptides are active against a wide variety of wine-related yeasts and …
NaN	NaN	NaN	NaN	-0.193668	-0.166503	0.204649	-0.00446549	-0.171157	-0.266142	NaN	NaN	S				1	152.47	39	0	0.159926	0.865937	NaN	-0.0399968	-0.21865	SESEPTTVSYEIAGNSPNAERGFHIHEFGDA	_FEQASESEPTTVSYEIAGNS(ph)PNAER_	P00445	S000003865	YJR104C	SOD1	SuperOxide Dismutase	Cytosolic copper-zinc superoxide dismutase; detoxifies superoxide; stabilizes Yck1p and Yck2p kinases in glucose to repress respiration; phosphorylated by Dun1p and enters the nucleus under oxidative stress to promote transcription of stress response genes; human ortholog implicated in ALS; abundance increases under DNA replication stress and during exposure to boric acid; localization of a fract…
-0.0317396	0.062398	NaN	NaN	NaN	NaN	0.100592	-0.0655723	-0.0572265	-0.67888	NaN	NaN	S				0.999981	82.651	99	0.0971465	0.0615982	0.350215	0.0153292	0.01751	-0.368053	DMGNVKTDENGVAKGSFKDSLIKLIGPTSVV	_TDENGVAKGS(ph)FKDSLIK_	P00445	S000003865	YJR104C	SOD1	SuperOxide Dismutase	Cytosolic copper-zinc superoxide dismutase; detoxifies superoxide; stabilizes Yck1p and Yck2p kinases in glucose to repress respiration; phosphorylated by Dun1p and enters the nucleus under oxidative stress to promote transcription of stress response genes; human ortholog implicated in ALS; abundance increases under DNA replication stress and during exposure to boric acid; localization of a fract…
0.125519	-0.0250889	0.0795085	-0.00302647	NaN	NaN	0.377163	-0.0564447	0.235359	0.161049	-0.424922	0.173205	S				0.999602	136.39	9	0.525529	0.225796	0.0809143	0.044228	0.160359	0.036173	_______MSRLERLTSLNVVAGSDLRRTSII	_LTS(ph)LNVVAGSDLRR_	P00549	S000000036	YAL038W	CDC19	Cell Division Cycle	Pyruvate kinase; functions as a homotetramer in glycolysis to convert phosphoenolpyruvate to pyruvate, the input for aerobic (TCA cycle) or anaerobic (glucose fermentation) respiration; regulated via allosteric activation by fructose bisphosphate; CDC19 has a paralog, PYK2, that arose from the whole genome duplication
NaN	NaN	NaN	NaN	-0.955032	-2.48851	3.26798	2.69526	NaN	NaN	NaN	NaN	S				0.99832	109.1	22	0	0.165634	0	NaN	0.629923	NaN	LANLKIGTPQQLRRTSIIGTIGPKTNSCEAI;LTSLNVVAGSDLRRTSIIGTIGPKTNNPETL	_RTS(ph)IIGTIGPK_	P00549	S000000036	YAL038W	CDC19	Cell Division Cycle	Pyruvate kinase; functions as a homotetramer in glycolysis to convert phosphoenolpyruvate to pyruvate, the input for aerobic (TCA cycle) or anaerobic (glucose fermentation) respiration; regulated via allosteric activation by fructose bisphosphate; CDC19 has a paralog, PYK2, that arose from the whole genome duplication
0.119024	0.0192037	0.109188	0.204516	-0.0198138	-0.0577219	0.0306487	0.143803	-0.0177091	-0.139077	0.125762	0.194427	S				1	184.68	266	1.2329	0.208657	0.206473	0.112983	0.024229	0.0408506	TPTYSKAASDAIPPASPKADAPIDKSIDKWF	_AASDAIPPAS(ph)PKADAPIDK_	P00817	S000000215	YBR011C	IPP1	Inorganic PyroPhosphatase	Cytoplasmic inorganic pyrophosphatase (PPase); homodimer that catalyzes the rapid exchange of oxygens from Pi with water, highly expressed and essential for viability, active-site residues show identity to those from E. coli PPase
NaN	NaN	NaN	NaN	0.106348	0.459956	NaN	NaN	NaN	NaN	NaN	NaN	S				0.999901	77.597	188	0	0.449348	0	NaN	0.283152	NaN	APTGAKTFAEALRIGSEVYHNLKSLTKKRYG;APTGAKTFAEAMRIGSEVYHNLKSLTKKRYG	_IGS(ph)EVYHNLK_	P00924	S000003486	YGR254W	ENO1	ENOlase	Enolase I, a phosphopyruvate hydratase; catalyzes conversion of 2-phosphoglycerate to phosphoenolpyruvate during glycolysis and the reverse reaction during gluconeogenesis; expression repressed in response to glucose; protein abundance increases in response to DNA replication stress; N-terminally propionylated in vivo; ENO1 has a paralog, ENO2, that arose from the whole genome duplication
NaN	NaN	NaN	NaN	NaN	NaN	NaN	NaN	-0.0283958	0.0708015	0.116864	-0.00360232	S				0.980229	100.97	10	0	0	0.483008	NaN	NaN	0.0389169	______MAVSKVYARSVYDSRGNPTVEVELT	_VYARS(ph)VYDSR_	P00924	S000003486	YGR254W	ENO1	ENOlase	Enolase I, a phosphopyruvate hydratase; catalyzes conversion of 2-phosphoglycerate to phosphoenolpyruvate during glycolysis and the reverse reaction during gluconeogenesis; expression repressed in response to glucose; protein abundance increases in response to DNA replication stress; N-terminally propionylated in vivo; ENO1 has a paralog, ENO2, that arose from the whole genome duplication
-1.08073	-0.591484	0.492078	-0.535555	-0.948865	-0.404038	0.599287	-0.365916	-1.08039	-0.586341	0.502117	-0.53963	S				1	138.21	2	0.544927	0.348196	0.537068	-0.428922	-0.279883	-0.426062	______________MSVHAATNPINKHVVLI	_(ac)S(ph)VHAATNPINK_	P00937	S000001694	YKL211C	TRP3	TRyPtophan requiring	Indole-3-glycerol-phosphate synthase; forms bifunctional hetero-oligomeric anthranilate synthase:indole-3-glycerol phosphate synthase enzyme complex with Trp2p
-1.39627	-0.962042	NaN	NaN	NaN	NaN	NaN	NaN	NaN	NaN	NaN	NaN	S				0.75281	86.497	215	0.93584	0	0	-1.17916	NaN	NaN	AASELRILYGGSANGSNAVTFKDKADVDGFL	_ILYGGSANGS(ph)NAVTFK_	P00942	S000002457	YDR050C	TPI1	Triose-Phosphate Isomerase	Triose phosphate isomerase, abundant glycolytic enzyme; mRNA half-life is regulated by iron availability; transcription is controlled by activators Reb1p, Gcr1p, and Rap1p through binding sites in the 5' non-coding region; inhibition of Tpi1p activity by PEP (phosphoenolpyruvate) stimulates redox metabolism in respiring cells; E104D mutation in human TPI causes a rare autosomal disease
0.145221	0.237808	-0.229588	0.240299	0.348799	0.201258	-0.292428	-0.0681893	NaN	NaN	NaN	NaN	S				1	113.51	116	0.354038	0.118418	0	0.0984351	0.0473597	NaN	TLKKFGEEKFNTYRRSFDVPPPPIDASSPFS	_S(ph)FDVPPPPIDASSPFSQK_	P00950	S000001635	YKL152C	GPM1	Glycerate PhosphoMutase	Tetrameric phosphoglycerate mutase; mediates the conversion of 3-phosphoglycerate to 2-phosphoglycerate during glycolysis and the reverse reaction during gluconeogenesis
NaN	NaN	NaN	NaN	-0.00610107	0.0469799	NaN	NaN	NaN	NaN	NaN	NaN	S				0.757279	52.19	131	0	0.234917	0	NaN	0.0204394	NaN	SFDVPPPPIDASSPFSQKGDERYKYVDPNVL	_SFDVPPPPIDASSPFS(ph)QKGDER_	P00950	S000001635	YKL152C	GPM1	Glycerate PhosphoMutase	Tetrameric phosphoglycerate mutase; mediates the conversion of 3-phosphoglycerate to 2-phosphoglycerate during glycolysis and the reverse reaction during gluconeogenesis
NaN	NaN	0.458901	0.350872	NaN	NaN	NaN	NaN	0.212756	0.297367	-1.23199	-0.534659	S				0.8628	88.768	271	1.0735	0	0.351199	0.404887	NaN	-0.31413	NTKYSSNGNGNRSDISRGNQNNALNSRSKQS	_SDIS(ph)RGNQNNALNSR_	P01119	S000005627	YOR101W	RAS1	homologous to RAS proto-oncogene	GTPase involved in G-protein signaling in adenylate cyclase activation; plays a role in cell proliferation; localized to the plasma membrane; homolog of mammalian RAS proto-oncogenes; relative distribution to the nucleus increases upon DNA replication stress; RAS1 has a paralog, RAS2, that arose from the whole genome duplication
NaN	NaN	NaN	NaN	NaN	NaN	NaN	NaN	-1.3761	NaN	NaN	NaN	S				1	129.47	214	0	0	0	NaN	NaN	-1.3761	GANSVPRNSGGHRKMSNAANGKNVNSSTTVV	_KMS(ph)NAANGKNVNSST(ph)TVVNAR_	P01120	S000005042	YNL098C	RAS2	homologous to RAS proto-oncogene	GTP-binding protein; regulates nitrogen starvation response, sporulation, and filamentous growth; farnesylation and palmitoylation required for activity and localization to plasma membrane; homolog of mammalian Ras proto-oncogenes; RAS2 has a paralog, RAS1, that arose from the whole genome duplication
1.25126	1.07834	2.50635	2.19515	NaN	NaN	1.70411	1.92134	1.19629	0.205893	2.98142	2.91594	S				0.994646	219.97	224	1.81803	1.41909	1.12641	1.75778	1.81272	1.82489	GHRKMSNAANGKNVNSSTTVVNARNASIESK	_NVNS(ph)S(ph)TTVVNAR_	P01120	S000005042	YNL098C	RAS2	homologous to RAS proto-oncogene	GTP-binding protein; regulates nitrogen starvation response, sporulation, and filamentous growth; farnesylation and palmitoylation required for activity and localization to plasma membrane; homolog of mammalian Ras proto-oncogenes; RAS2 has a paralog, RAS1, that arose from the whole genome duplication
-0.214809	-0.371889	3.26313	2.60375	NaN	NaN	1.06803	0.412827	0.0281448	-0.189993	2.98142	2.3288	S				0.990996	247.93	225	0.592545	0.576446	0.684111	1.32005	0.740428	1.28709	HRKMSNAANGKNVNSSTTVVNARNASIESKT	_NVNS(ph)S(ph)TTVVNAR_	P01120	S000005042	YNL098C	RAS2	homologous to RAS proto-oncogene	GTP-binding protein; regulates nitrogen starvation response, sporulation, and filamentous growth; farnesylation and palmitoylation required for activity and localization to plasma membrane; homolog of mammalian Ras proto-oncogenes; RAS2 has a paralog, RAS1, that arose from the whole genome duplication
-0.0112535	-0.183261	0.660954	0.583744	-0.0351061	-0.16046	0.472229	0.37286	-0.0107447	-0.363234	1.43148	0.232566	S				1	252.71	235	0.519629	0.433754	0.32954	0.262546	0.162381	0.322517	KNVNSSTTVVNARNASIESKTGLAGNQATNG	_NAS(ph)IES(ph)KTGLAGNQATNGK_	P01120	S000005042	YNL098C	RAS2	homologous to RAS proto-oncogene	GTP-binding protein; regulates nitrogen starvation response, sporulation, and filamentous growth; farnesylation and palmitoylation required for activity and localization to plasma membrane; homolog of mammalian Ras proto-oncogenes; RAS2 has a paralog, RAS1, that arose from the whole genome duplication
-0.0668504	-0.140603	0.144728	0.859693	-0.0351061	-0.16046	-0.363451	-0.144438	-0.416231	-1.24742	0.453261	-0.143655	S				0.999888	252.71	238	0.349643	1.08327	0.388742	0.199242	-0.175864	-0.338512	NSSTTVVNARNASIESKTGLAGNQATNGKTQ	_NAS(ph)IES(ph)KTGLAGNQATNGK_	P01120	S000005042	YNL098C	RAS2	homologous to RAS proto-oncogene	GTP-binding protein; regulates nitrogen starvation response, sporulation, and filamentous growth; farnesylation and palmitoylation required for activity and localization to plasma membrane; homolog of mammalian Ras proto-oncogenes; RAS2 has a paralog, RAS1, that arose from the whole genome duplication
NaN	NaN	NaN	NaN	0.277032	0.628914	NaN	NaN	NaN	NaN	NaN	NaN	S				0.998116	156.47	273	0	0.627358	0	NaN	0.452973	NaN	NIDNSTGQAGQANAQSANTVNNRVNNNSKAG	_TQTDRTNIDNSTGQAGQANAQS(ph)ANTVNNR_	P01120	S000005042	YNL098C	RAS2	homologous to RAS proto-oncogene	GTP-binding protein; regulates nitrogen starvation response, sporulation, and filamentous growth; farnesylation and palmitoylation required for activity and localization to plasma membrane; homolog of mammalian Ras proto-oncogenes; RAS2 has a paralog, RAS1, that arose from the whole genome duplication
NaN	NaN	NaN	NaN	NaN	NaN	NaN	NaN	NaN	NaN	NaN	NaN	S				0.761742	162.79	172	0	0	0	NaN	NaN	NaN	NVEDAFLTMARQIKESMSQQNLNETTQKKED	_ES(ph)M(ox)SQQNLNETTQK_	P01123	S000001856	YFL038C	YPT1	Yeast Protein Two	Rab family GTPase; involved in the ER-to-Golgi step of the secretory pathway; complex formation with the Rab escort protein Mrs6p is required for prenylation of Ypt1p by protein geranylgeranyltransferase type II (Bet2p-Bet4p); binds to unspliced HAC1 mRNA; regulates unfolded protein response (UPR) by promoting the decay of HAC1 RNA
-0.186246	0.205643	0.0776651	-0.0321009	0.0792927	0.18916	-0.141564	-0.0471196	0.127897	0.180148	-0.255924	-0.0976109	S				1	131.66	100	0.0666945	0.0965817	0.0372691	0.0162404	0.0199425	-0.0113723	GDAAEEEKEEEAKEESDDDMGFGLFD_____	_EES(ph)DDDMGFGLFD_	P02400	S000002790	YDR382W	RPP2B	Ribosomal Protein P2 Beta	Ribosomal protein P2 beta; a component of the ribosomal stalk, which is involved in the interaction between translational elongation factors and the ribosome; free (non-ribosomal) P2 stimulates the phosphorylation of the eIF2 alpha subunit (Sui2p) by Gcn2p; regulates the accumulation of P1 (Rpp1Ap and Rpp1Bp) in the cytoplasm
NaN	NaN	-0.999278	-0.364348	NaN	NaN	NaN	NaN	NaN	NaN	NaN	NaN	S				0.999998	67.415	125	0.556866	0	0	-0.681813	NaN	NaN	VKSLGLKLPLSVINVSAQRDRRYRKRV____	_LPLSVINVS(ph)AQR_	P02407	S000004486	YML024W	RPS17A	Ribosomal Protein of the Small subunit	Ribosomal protein 51 (rp51) of the small (40s) subunit; homologous to mammalian ribosomal protein S17, no bacterial homolog; RPS17A has a paralog, RPS17B, that arose from the whole genome duplication
NaN	NaN	NaN	NaN	NaN	NaN	1.06055	0.536106	NaN	NaN	NaN	NaN	S				0.999096	73.11	278	0	0.694566	0	NaN	0.798327	NaN	IEELNKTKPLWTRNPSDITQEEYNAFYKSIS;LEELNKTKPLWTRNPSDITQEEYNAFYKSIS	_NPS(ph)DITQEEYNAFYK_	P02829	S000006161	YPL240C	HSP82	Heat Shock Protein	Hsp90 chaperone; redundant in function with Hsc82p; required for pheromone signaling, negative regulation of Hsf1p; docks with Tom70p for mitochondrial preprotein delivery; promotes telomerase DNA binding, nucleotide addition; protein abundance increases in response to DNA replication stress; contains two acid-rich unstructured regions that promote solubility of chaperone-substrate complexes; HSP…
0.0343565	0.364124	-0.626486	-0.372841	NaN	NaN	NaN	NaN	NaN	NaN	NaN	NaN	S				0.884515	38.418	258	0.266114	0	0	-0.150211	NaN	NaN	RDLNKPFLMPVEDIFSISGRGTVVTGRVERG	_DLNKPFLMPVEDIFS(ph)ISGR_	P02992	S000005713	YOR187W	TUF1		Mitochondrial translation elongation factor Tu; comprises both GTPase and guanine nucleotide exchange factor activities, while these activities are found in separate proteins in S. pombe and humans
NaN	NaN	NaN	NaN	NaN	NaN	NaN	NaN	NaN	NaN	NaN	NaN	S				1	139.86	405	0	0	0	NaN	NaN	NaN	KPLYVAIAQRKDVRRSQLAQQIQARNQMRYQ	_S(ph)QLAQQIQAR_	P04147	S000000967	YER165W	PAB1	Poly(A) Binding protein	Poly(A) binding protein; part of the 3'-end RNA-processing complex, mediates interactions between the 5' cap structure and the 3' mRNA poly(A) tail, involved in control of poly(A) tail length, interacts with translation factor eIF-4G; stimulates, but is not required for the deadenylation activity of the Pan2p-Pan3p poly(A)-ribonuclease complex
-0.281544	-0.057692	NaN	NaN	NaN	NaN	NaN	NaN	-0.132625	-0.0929863	NaN	NaN	S				1	61.65	95	0.43024	0	0.955768	-0.169618	NaN	-0.112806	RPITGASLDLIKERRSLKPEVRKANREEKLK	_S(ph)LKPEVR_	P04449	S000002999	YGL031C	RPL24A	Ribosomal Protein of the Large subunit	Ribosomal 60S subunit protein L24A; not essential for translation but may be required for normal translation rate; homologous to mammalian ribosomal protein L24, no bacterial homolog; RPL24A has a paralog, RPL24B, that arose from the whole genome duplication
0.185232	0.173128	-0.161694	-0.0859685	0.129745	0.230572	-0.11703	0.00429115	-0.0174755	0.1141	-0.0323829	0.0242377	S				0.999999	150.69	76	0.110217	0.32573	0.259855	0.0276742	0.0618944	0.0221199	TKKIKTEPVQSSSLPSPPAKKSATSKPKKIK	_IKTEPVQSSSLPS(ph)PPAKK_	P04786	S000005366	YOL006C	TOP1	TOPoisomerase	Topoisomerase I; nuclear enzyme that relieves torsional strain in DNA by cleaving and re-sealing the phosphodiester backbone; relaxes both positively and negatively supercoiled DNA; functions in replication, transcription, and recombination; role in processing ribonucleoside monophosphates in genomic DNA into irreversible single-strand breaks
0.231924	0.15782	0.0014001	0.143437	0.0343565	0.110363	-0.0908535	-0.0173518	0.0788831	0.0480967	0.34806	0.0729683	S				0.990942	121.33	49	1.1595	0.0739791	0.830019	0.133645	0.0091286	0.137002	SMNSASLQDEAEPYDSDEAISKISKKKTKKI	_VASMNSASLQDEAEPYDS(ph)DEAISK_	P04786	S000005366	YOL006C	TOP1	TOPoisomerase	Topoisomerase I; nuclear enzyme that relieves torsional strain in DNA by cleaving and re-sealing the phosphodiester backbone; relaxes both positively and negatively supercoiled DNA; functions in replication, transcription, and recombination; role in processing ribonucleoside monophosphates in genomic DNA into irreversible single-strand breaks
0.200253	-0.0202526	NaN	NaN	0.104739	-0.13193	0.125353	0.239174	-0.123733	-0.193767	0.0354165	0.0641782	S				1	98.121	14	0.248593	0.445746	0.351351	0.0900003	0.0843341	-0.0544761	__MTIADASKVNHELSSDDDDDVPLSQTLKK	_VNHELS(ph)S(ph)DDDDDVPLSQTLK_	P04786	S000005366	YOL006C	TOP1	TOPoisomerase	Topoisomerase I; nuclear enzyme that relieves torsional strain in DNA by cleaving and re-sealing the phosphodiester backbone; relaxes both positively and negatively supercoiled DNA; functions in replication, transcription, and recombination; role in processing ribonucleoside monophosphates in genomic DNA into irreversible single-strand breaks
0.200253	-0.0202526	NaN	NaN	0.104739	-0.13193	0.125353	0.239174	-0.0895743	-0.0564162	0.0354165	0.0641782	S				1	98.121	15	0.248593	0.445746	0.112462	0.0900003	0.0843341	-0.0115989	_MTIADASKVNHELSSDDDDDVPLSQTLKKR	_VNHELS(ph)S(ph)DDDDDVPLSQTLK_	P04786	S000005366	YOL006C	TOP1	TOPoisomerase	Topoisomerase I; nuclear enzyme that relieves torsional strain in DNA by cleaving and re-sealing the phosphodiester backbone; relaxes both positively and negatively supercoiled DNA; functions in replication, transcription, and recombination; role in processing ribonucleoside monophosphates in genomic DNA into irreversible single-strand breaks
NaN	NaN	NaN	NaN	NaN	NaN	NaN	NaN	NaN	NaN	NaN	NaN	S				0.999951	106.2	195	0	0	0	NaN	NaN	NaN	FYEMAVRDSMKDISESPERTVSQADFPGLEG	_DISES(ph)PER_	P04801	S000001340	YIL078W	THS1	THreonyl tRNA Synthetase	Threonyl-tRNA synthetase; essential cytoplasmic protein
-0.0587284	0.248899	0.192645	-0.164658	-0.424281	-0.314679	0.119777	-0.262674	-0.102326	0.146003	0.423352	-0.179129	S				0.995334	159.18	2	0.207445	0.797835	0.198172	0.0545395	-0.220464	0.0719752	______________MSASEAGVTEQVKKLSV	_(ac)S(ph)ASEAGVTEQVKK_	P04801	S000001340	YIL078W	THS1	THreonyl tRNA Synthetase	Threonyl-tRNA synthetase; essential cytoplasmic protein
0.0363276	-0.043631	0.232396	0.244275	-0.0757329	-0.0704514	-0.383276	-0.344147	0.178746	-0.0643441	0.25008	-0.45133	S				0.858602	159.18	4	0.697654	1.09163	0.0459744	0.117342	-0.218402	-0.021712	____________MSASEAGVTEQVKKLSVKD	_(ac)SAS(ph)EAGVTEQVKK_	P04801	S000001340	YIL078W	THS1	THreonyl tRNA Synthetase	Threonyl-tRNA synthetase; essential cytoplasmic protein
1.22014	0.984772	NaN	NaN	NaN	NaN	NaN	NaN	NaN	NaN	NaN	NaN	S				0.831084	86.8	201	1.1694	0	0	1.10246	NaN	NaN	RDSMKDISESPERTVSQADFPGLEGVAKNVI	_TVS(ph)QADFPGLEGVAK_	P04801	S000001340	YIL078W	THS1	THreonyl tRNA Synthetase	Threonyl-tRNA synthetase; essential cytoplasmic protein
0.763157	0.393526	NaN	NaN	NaN	NaN	NaN	NaN	NaN	NaN	NaN	NaN	S				1	101.95	301	0.705733	0	0	0.578341	NaN	NaN	VFEVTYFKGKAYLAQSPQFNKQQLIVADFER	_AYLAQS(ph)PQFNK_	P04802	S000003941	YLL018C	DPS1		Aspartyl-tRNA synthetase, primarily cytoplasmic; homodimeric enzyme that catalyzes the specific aspartylation of tRNA(Asp); class II aminoacyl tRNA synthetase; binding to its own mRNA may confer autoregulation; shares five highly conserved amino acids with human that when mutated cause leukoencephalopathy characterized by hypomyelination with brain stem and spinal cord involvement and leg spastic…
-0.141589	-0.141717	0.411042	0.337867	-0.0232405	-0.159863	0.139697	0.29442	-0.15748	-0.320378	0.226476	0.163042	S				1	147.33	15	0.306621	0.244478	0.0574554	0.116401	0.0627533	-0.022085	_MVHLGPKKPQARKGSMADVPKELMDEIHQL	_KGS(ph)MADVPK_	P04806	S000001949	YFR053C	HXK1	HeXoKinase	Hexokinase isoenzyme 1; a cytosolic protein that catalyzes phosphorylation of glucose during glucose metabolism; expression is highest during growth on non-glucose carbon sources; glucose-induced repression involves hexokinase Hxk2p; HXK1 has a paralog, HXK2, that arose from the whole genome duplication
-0.101799	-0.0826522	0.120388	0.131076	0.126709	-0.0322411	0.0261022	0.258166	-0.0907415	-0.0336138	0.0232697	0.0337763	S				1	159.59	15	0.0927193	0.631898	0.222304	0.0167532	0.094684	-0.0168273	_MVHLGPKKPQARKGSMADVPKELMQQIENF	_KGS(ph)M(ox)ADVPKELM(ox)QQIENFEK_	P04807	S000003222	YGL253W	HXK2	HeXoKinase	Hexokinase isoenzyme 2; catalyzes phosphorylation of glucose in the cytosol; predominant hexokinase during growth on glucose; functions in the nucleus to repress expression of HXK1 and GLK1 and to induce expression of its own gene; antiapoptotic; phosphorylation/dephosphorylation at serine-14 by protein kinase Snf1p and protein phosphatase Glc7p-Reg1p regulates nucleocytoplasmic shuttling of Hxk2…
-0.16558	-0.274808	-2.30407	-1.14672	0.501108	0.46874	-0.397474	0.237388	-0.00118347	-0.404401	-1.92668	-1.0072	S				1	110.51	38	0.84115	0.394668	0.853744	-0.972795	0.20244	-0.834866	LFHDVEASQTHHRRGSIPLKDEKSKELYPLR	_RGS(ph)IPLKDEK_	P04817	S000000789	YEL063C	CAN1	CANavanine resistance	Plasma membrane arginine permease; requires phosphatidyl ethanolamine (PE) for localization, exclusively associated with lipid rafts; mutation confers canavanine resistance; CAN1 has a paralog, ALP1, that arose from the whole genome duplication
NaN	NaN	-2.34105	-0.288772	NaN	NaN	NaN	NaN	NaN	NaN	NaN	NaN	S				0.941744	145.52	4	0.374825	0	0	-1.31491	NaN	NaN	____________MTNSKEDADIEEKHMYNEP	_TNS(ph)KEDADIEEK_	P04817	S000000789	YEL063C	CAN1	CANavanine resistance	Plasma membrane arginine permease; requires phosphatidyl ethanolamine (PE) for localization, exclusively associated with lipid rafts; mutation confers canavanine resistance; CAN1 has a paralog, ALP1, that arose from the whole genome duplication
1.00317	1.02411	-0.98943	0.297449	0.612494	0.440421	NaN	NaN	NaN	NaN	-0.363003	-0.0677764	S				0.992515	139.46	66	0.275198	0.986622	0.41738	0.333824	0.526457	-0.21539	PLRSFPTRVNGEDTFSMEDGIGDEDEGEVQN	_VNGEDTFS(ph)MEDGIGDEDEGEVQNAEVKR_	P04817	S000000789	YEL063C	CAN1	CANavanine resistance	Plasma membrane arginine permease; requires phosphatidyl ethanolamine (PE) for localization, exclusively associated with lipid rafts; mutation confers canavanine resistance; CAN1 has a paralog, ALP1, that arose from the whole genome duplication
0.724388	0.260387	NaN	NaN	0.649018	0.465295	-0.112366	0.243967	-0.10507	-0.11182	0.182393	-0.346645	S				1	185.28	75	0.552349	0.814411	0.353007	0.492388	0.311478	-0.0952854	KKSSKHMLEDRMDNVSGEEEYATKKLKQTAV	_M(ox)DNVS(ph)GEEEYATK_	P04819	S000002323	YDL164C	CDC9	Cell Division Cycle	DNA ligase found in the nucleus and mitochondria; an essential enzyme that joins Okazaki fragments during DNA replication; also acts in ribonucleotide excision repair, base excision repair, and recombination,
1.21269	1.51299	-2.38031	-0.91219	0.940054	0.773068	-1.41489	-0.154324	NaN	NaN	NaN	NaN	S				0.999985	135.14	58	0.0518421	0.0217773	0	-0.141706	0.0359762	NaN	RFFTSMKNKPTEGTPSPKKSSKHMLEDRMDN	_NKPTEGTPS(ph)PK_	P04819	S000002323	YDL164C	CDC9	Cell Division Cycle	DNA ligase found in the nucleus and mitochondria; an essential enzyme that joins Okazaki fragments during DNA replication; also acts in ribonucleotide excision repair, base excision repair, and recombination,
NaN	NaN	NaN	NaN	-0.513831	-0.31199	NaN	NaN	NaN	NaN	NaN	NaN	S				0.997901	94.023	629	0	0.816427	0	NaN	-0.412911	NaN	NENDMENFSVLGPRNSVNSVVTPRTSIQNST	_NS(ph)VNSVVTPR_	P04821	S000004301	YLR310C	CDC25	Cell Division Cycle	Membrane bound guanine nucleotide exchange factor; indirectly regulates adenylate cyclase through activation of Ras1p and Ras2p by stimulating the exchange of GDP for GTP; required for progression through G1; a membrane bound guanine nucleotide exchange factor is also known as a GEF or GDP-release factor
NaN	NaN	NaN	NaN	1.42852	0.914871	NaN	NaN	NaN	NaN	NaN	NaN	S				0.999886	93.623	129	0	0.862114	0	NaN	1.17169	NaN	HQNLLPKKSAKATKASQEL____________	_ATKAS(ph)QEL_	P04911	S000002633	YDR225W	HTA1	Histone h Two A	Histone H2A; core histone protein required for chromatin assembly and chromosome function; one of two nearly identical subtypes (see also HTA2); DNA damage-dependent phosphorylation by Mec1p facilitates DNA repair; acetylated by Nat4p; N-terminally propionylated in vivo
0.547647	1.06936	-0.835601	-0.126312	NaN	NaN	-0.930775	-0.0329472	NaN	NaN	NaN	NaN	S				0.999985	89.805	129	0.143602	0.32105	0	0.163773	-0.481861	NaN	HQNLLPKKSAKTAKASQEL____________	_TAKAS(ph)QEL_	P04912	S000000099	YBL003C	HTA2	Histone h Two A	Histone H2A; core histone protein required for chromatin assembly and chromosome function; one of two nearly identical (see also HTA1) subtypes; DNA damage-dependent phosphorylation by Mec1p facilitates DNA repair; acetylated by Nat4p
0.0643311	-0.0673039	0.293412	0.22754	0.0844725	-0.365797	0.709788	0.6647	-0.0618271	-0.272942	0.0449997	0.392914	S				1	192.65	899	0.678282	0.438459	0.0631225	0.129495	0.273291	0.025786	RLMNGKPMKEKKSTRSVEDFMAAMQRVSTQH	_S(ph)VEDFMAAMQR_	P05030	S000002976	YGL008C	PMA1	Plasma Membrane ATPase	Plasma membrane H+-ATPase; pumps protons out of the cell; major regulator of cytoplasmic pH and plasma membrane potential; P2-type ATPase; long-lived protein that is asymmetrically retained in the plasma membrane of mother cells; Hsp30p plays a role in Pma1p regulation; interactions with Std1p appear to propagate [GAR+]
-0.6655	-0.484913	-0.341189	-0.0931545	-1.30276	0.288772	-2.1902	-3.49006	0.556307	0.514097	0.29396	0.337065	S				1	145.55	911	1.33271	0.901492	2.14696	-0.396189	-1.67356	0.425357	STRSVEDFMAAMQRVSTQHEKET________	_SVEDFMAAMQRVS(ph)T(ph)QHEK_	P05030	S000002976	YGL008C	PMA1	Plasma Membrane ATPase	Plasma membrane H+-ATPase; pumps protons out of the cell; major regulator of cytoplasmic pH and plasma membrane potential; P2-type ATPase; long-lived protein that is asymmetrically retained in the plasma membrane of mother cells; Hsp30p plays a role in Pma1p regulation; interactions with Std1p appear to propagate [GAR+]
1.51894	0.711054	NaN	NaN	NaN	NaN	NaN	NaN	NaN	NaN	NaN	NaN	S				0.956399	128.36	14	0.655073	0	0	1.115	NaN	NaN	__MTDTSSSSSSSSASSVSAHQPTQEKPAKT	_TDTSSS(ph)SS(ph)SSSAS(ph)S(ph)VSAHQPTQEKPAK_	P05030	S000002976	YGL008C	PMA1	Plasma Membrane ATPase	Plasma membrane H+-ATPase; pumps protons out of the cell; major regulator of cytoplasmic pH and plasma membrane potential; P2-type ATPase; long-lived protein that is asymmetrically retained in the plasma membrane of mother cells; Hsp30p plays a role in Pma1p regulation; interactions with Std1p appear to propagate [GAR+]
1.52276	0.823423	NaN	NaN	0.603976	-0.292917	NaN	NaN	1.78182	1.47348	NaN	NaN	S				0.936163	144.57	15	0.734188	0.103765	1.22097	1.17309	0.15553	1.62765	_MTDTSSSSSSSSASSVSAHQPTQEKPAKTY	_TDTSSS(ph)SS(ph)SSSAS(ph)S(ph)VSAHQPTQEKPAK_	P05030	S000002976	YGL008C	PMA1	Plasma Membrane ATPase	Plasma membrane H+-ATPase; pumps protons out of the cell; major regulator of cytoplasmic pH and plasma membrane potential; P2-type ATPase; long-lived protein that is asymmetrically retained in the plasma membrane of mother cells; Hsp30p plays a role in Pma1p regulation; interactions with Std1p appear to propagate [GAR+]
NaN	NaN	NaN	NaN	NaN	NaN	NaN	NaN	NaN	NaN	NaN	NaN	S				0.940157	55.977	302	0	0	0	NaN	NaN	NaN	DAAPAEEAAAEEEEESDDDMGFGLFD_____	_YAAAAPAATSAASGDAAPAEEAAAEEEEES(ph)DDDMGFGLFD_	P05317	S000004332	YLR340W	RPP0	Ribosomal Protein P0	Conserved ribosomal protein P0 of the ribosomal stalk; involved in interaction between translational elongation factors and the ribosome; phosphorylated on serine 302; homologous to mammalian ribosomal protein LP0 and bacterial L10
NaN	NaN	NaN	NaN	NaN	NaN	NaN	NaN	NaN	NaN	NaN	NaN	S				1	131.66	96	0	0	0	NaN	NaN	NaN	GEAEAEKEEEEAKEESDDDMGFGLFD_____	_EES(ph)DDDMGFGLFD_	P05318	S000002239	YDL081C	RPP1A	Ribosomal Protein P1 Alpha	Ribosomal stalk protein P1 alpha; involved in the interaction between translational elongation factors and the ribosome; free (non-ribosomal) P1 stimulates the phosphorylation of the eIF2 alpha subunit (Sui2p) by Gcn2p; accumulation of P1 in the cytoplasm is regulated by phosphorylation and interaction with the P2 stalk component
-0.394411	-0.10262	NaN	NaN	NaN	NaN	NaN	NaN	NaN	NaN	NaN	NaN	S				0.811375	123.63	327	0.471143	0	0	-0.248516	NaN	NaN	NPHIERTYGDGTDSDSQMNSRIDDLISKENY	_TYGDGTDSDS(ph)QM(ox)NSR_	P05374	S000003389	YGR157W	CHO2	CHOline requiring	Phosphatidylethanolamine methyltransferase (PEMT); catalyzes the first step in the conversion of phosphatidylethanolamine to phosphatidylcholine during the methylation pathway of phosphatidylcholine biosynthesis
-0.50826	-0.891616	0.953774	0.241236	-0.542963	-0.630818	0.453399	0.190322	-0.424959	-0.669579	0.712102	0.100128	S				1	155.66	11	0.0417504	0.183522	0.0795603	-0.0512163	-0.132515	-0.0705769	_____MAAEKILTPESQLKKSKAQQKTAEQV	_ILT(ph)PES(ph)QLKK_	P05737	S000003044	YGL076C	RPL7A	Ribosomal Protein of the Large subunit	Ribosomal 60S subunit protein L7A; required for processing of 27SA3 pre-rRNA to 27SB pre-rRNA during assembly of large ribosomal subunit; depletion leads to a turnover of pre-rRNA; contains a conserved C-terminal Nucleic acid Binding Domain (NDB2); binds to Domain II of 25S and 5.8S rRNAs; homologous to mammalian ribosomal protein L7 and bacterial L30; RPL7A has a paralog, RPL7B, that arose from …
NaN	NaN	NaN	NaN	-1.04788	-2.58329	2.63451	1.41874	NaN	NaN	NaN	NaN	S				0.990951	123.67	113	0	0.029502	0	NaN	0.10552	NaN	KPRKVLQLLRLTRINSGTFVKVTKATLELLK	_INS(ph)GTFVK_	P05737	S000003044	YGL076C	RPL7A	Ribosomal Protein of the Large subunit	Ribosomal 60S subunit protein L7A; required for processing of 27SA3 pre-rRNA to 27SB pre-rRNA during assembly of large ribosomal subunit; depletion leads to a turnover of pre-rRNA; contains a conserved C-terminal Nucleic acid Binding Domain (NDB2); binds to Domain II of 25S and 5.8S rRNAs; homologous to mammalian ribosomal protein L7 and bacterial L30; RPL7A has a paralog, RPL7B, that arose from …
-0.0632886	0.114367	NaN	NaN	NaN	NaN	0.28597	0.067591	0.0167816	0.321004	NaN	NaN	S				0.813404	87.149	65	0.0852496	0.453159	0.330917	0.0255392	0.17678	0.168893	QVLDHQRAIPFRRFNSSIGRTAQGKEFGVTK	_FNS(ph)SIGR_	P05740	S000001663	YKL180W	RPL17A	Ribosomal Protein of the Large subunit	Ribosomal 60S subunit protein L17A; copurifies with the Dam1 complex (aka DASH complex); homologous to mammalian ribosomal protein L17 and bacterial L22; RPL17A has a paralog, RPL17B, that arose from the whole genome duplication; protein abundance increases in response to DNA replication stress
0.249627	0.435522	-0.191057	0.0970234	0.273337	0.501414	-0.340847	-0.1644	0.199374	0.222186	-0.236584	-0.0201999	S				1	150.68	221	0.461054	0.124253	0.138379	0.147779	0.0673758	0.041194	VTIIEPKEEEPILAPSVKDYRPAEETEAQAE	_EEEPILAPS(ph)VK_	P05750	S000005122	YNL178W	RPS3	Ribosomal Protein of the Small subunit	Protein component of the small (40S) ribosomal subunit; has apurinic/apyrimidinic (AP) endonuclease activity; essential for viability; homologous to mammalian ribosomal protein S3 and bacterial S3
0.169925	0.14104	-0.449535	-0.189919	0.206018	0.101919	-0.195726	-0.0315363	0.198746	0.0211954	0.127888	0.339619	S				1	250.79	184	0.210563	0.0802444	1.08507	-0.0821223	0.0201687	0.171862	PGRVARRNAARKAEASGEAAEEAEDEE____	_KAEAS(ph)GEAAEEAEDEE_	P05755	S000000393	YBR189W	RPS9B	Ribosomal Protein of the Small subunit	Protein component of the small (40S) ribosomal subunit; homologous to mammalian ribosomal protein S9 and bacterial S4; RPS9B has a paralog, RPS9A, that arose from the whole genome duplication
-0.6878	-0.574283	-0.422125	-0.687956	-0.0698607	-0.0642537	-0.0662615	-0.153287	-0.927304	-0.479794	NaN	NaN	S				0.989694	109.66	15	2.59614	1.57611	0.707679	-0.593041	-0.0884156	-0.703549	_MYVDPMNNNEIRKLSITAKTETTPDNVGQD	_KLS(ph)ITAK_	P05986	S000001649	YKL166C	TPK3	Takashi's Protein Kinase	cAMP-dependent protein kinase catalytic subunit; promotes vegetative growth in response to nutrients via the Ras-cAMP signaling pathway; partially redundant with Tpk1p and Tpk2p; localizes to P-bodies during stationary phase; TPK3 has a paralog, TPK1, that arose from the whole genome duplication
-0.041239	0.0608775	0.0454165	-0.0538064	-0.040215	0.0867838	-0.151339	-0.318693	NaN	NaN	0.530197	0.377463	S				1	123.53	14	0.0316593	0.514121	0.974157	0.00281215	-0.105866	0.45383	__MAIDYSKWDKIELSDDSDVEVHPNVDKKS	_WDKIELS(ph)DDS(ph)DVEVHPNVDKK_	P06101	S000002575	YDR168W	CDC37	Cell Division Cycle	Essential Hsp90p co-chaperone; necessary for passage through the START phase of the cell cycle; stabilizes protein kinase nascent chains and participates along with Hsp90p in their folding
-0.041239	0.0608775	0.0454165	-0.0538064	-0.040215	0.0867838	-0.151339	-0.318693	NaN	NaN	0.530197	0.377463	S				1	123.53	17	0.0316593	0.514121	0.974157	0.00281215	-0.105866	0.45383	AIDYSKWDKIELSDDSDVEVHPNVDKKSFIK	_WDKIELS(ph)DDS(ph)DVEVHPNVDKK_	P06101	S000002575	YDR168W	CDC37	Cell Division Cycle	Essential Hsp90p co-chaperone; necessary for passage through the START phase of the cell cycle; stabilizes protein kinase nascent chains and participates along with Hsp90p in their folding
-0.415288	-0.619537	NaN	NaN	-0.467952	-0.54614	0.968097	0.349162	NaN	NaN	NaN	NaN	S				0.947971	73.138	322	0.906373	0.072294	0	-0.517412	0.0757915	NaN	SPVIPVADASKETERSPSSSPIHNATKPEEA	_ETERS(ph)PS(ph)SS(ph)PIHNATKPEEAVK_	P06102	S000001300	YIL038C	NOT3		Subunit of CCR4-NOT global transcriptional regulator; involved intranscription initiation and elongation and in mRNA degradation; conserved lysine in human homolog of Not3p and Not5p is mutated in cancers
0.564037	1.0453	-0.693587	-0.113434	-0.467952	-0.54614	-0.690015	-0.0557509	-0.238647	-0.695863	NaN	NaN	S				0.878461	73.138	326	0.197099	1.31787	0.538092	0.20058	-0.439965	-0.467255	PVADASKETERSPSSSPIHNATKPEEAVKTS	_ETERS(ph)PS(ph)SS(ph)PIHNATKPEEAVK_	P06102	S000001300	YIL038C	NOT3		Subunit of CCR4-NOT global transcriptional regulator; involved intranscription initiation and elongation and in mRNA degradation; conserved lysine in human homolog of Not3p and Not5p is mutated in cancers
-0.541261	-0.470069	-0.579566	-1.0224	-0.123827	0.0124972	-0.528771	-0.481609	-1.60718	-0.739854	NaN	NaN	S				1	130.89	450	1.86469	0.900759	0.647146	-0.653325	-0.280427	-1.17352	AAATTTSSNANSRIGSALNTPKLSTSSLSLQ	_IGS(ph)ALNT(ph)PK_	P06102	S000001300	YIL038C	NOT3		Subunit of CCR4-NOT global transcriptional regulator; involved intranscription initiation and elongation and in mRNA degradation; conserved lysine in human homolog of Not3p and Not5p is mutated in cancers
-0.405623	-0.402664	NaN	NaN	0.0429245	0.233643	-0.418784	-0.0354831	NaN	NaN	NaN	NaN	S				0.97548	288.78	441	2.63251	0.115203	0	-0.404144	-0.0444249	NaN	NTSTKTPTTAAATTTSSNANSRIGSALNTPK	_TPTTAAATTTS(ph)SNANSR_	P06102	S000001300	YIL038C	NOT3		Subunit of CCR4-NOT global transcriptional regulator; involved intranscription initiation and elongation and in mRNA degradation; conserved lysine in human homolog of Not3p and Not5p is mutated in cancers
-0.368197	-0.355147	-0.66257	-0.597221	-0.394525	0.0227584	-0.529671	-0.17645	-0.49771	-0.118946	NaN	NaN	S				0.994186	282.72	442	2.09386	0.945273	0.455117	-0.495784	-0.269472	-0.308328	TSTKTPTTAAATTTSSNANSRIGSALNTPKL	_TPTTAAATTTSS(ph)NANS(ph)R_	P06102	S000001300	YIL038C	NOT3		Subunit of CCR4-NOT global transcriptional regulator; involved intranscription initiation and elongation and in mRNA degradation; conserved lysine in human homolog of Not3p and Not5p is mutated in cancers
-0.144058	-0.103906	-0.700529	-0.53067	0.123931	0.139731	-0.090718	0.607177	-0.735331	-0.744149	NaN	NaN	S				0.999996	242.71	446	1.06737	0.557858	2.42089	-0.369791	0.19503	-0.73974	TPTTAAATTTSSNANSRIGSALNTPKLSTSS	_TPTTAAATTTSS(ph)NANS(ph)R_	P06102	S000001300	YIL038C	NOT3		Subunit of CCR4-NOT global transcriptional regulator; involved intranscription initiation and elongation and in mRNA degradation; conserved lysine in human homolog of Not3p and Not5p is mutated in cancers
0.0304067	-0.00498587	-0.14991	0.103596	0.0908535	-0.106374	-0.461319	-0.308244	NaN	NaN	NaN	NaN	S				1	303.23	1112	0.0324198	0.696939	0	-0.00522315	-0.196271	NaN	TMRLTYEPIDLSSILSDGEEKEVTKDTSNDS	_LTYEPIDLSSILS(ph)DGEEK_	P06105	S000003616	YJL080C	SCP160	S. cerevisiae protein involved in the Control of Ploidy	Essential RNA-binding G protein effector of mating response pathway; ligand-activated RNA-binding protein that delivers RNAs involved in polarization and perpetualizing mating signal to shmoo tip during pheromone signaling; Scp160p-mediated RNA trafficking essential for chemotropism and successful mating; mainly associated with nuclear envelope and ER, interacts in mRNA-dependent manner with tran…
0.770449	0.606632	NaN	NaN	NaN	NaN	NaN	NaN	NaN	NaN	NaN	NaN	S				0.926588	126.68	85	1.12276	0	0	0.68854	NaN	NaN	VKVSWGPNMKPAVSNSPSPSPSAPSLTTGLG	_VSWGPNMKPAVSNS(ph)PSPS(ph)PSAPSLTTGLGAK_	P06105	S000003616	YJL080C	SCP160	S. cerevisiae protein involved in the Control of Ploidy	Essential RNA-binding G protein effector of mating response pathway; ligand-activated RNA-binding protein that delivers RNAs involved in polarization and perpetualizing mating signal to shmoo tip during pheromone signaling; Scp160p-mediated RNA trafficking essential for chemotropism and successful mating; mainly associated with nuclear envelope and ER, interacts in mRNA-dependent manner with tran…
0.770449	0.606632	NaN	NaN	NaN	NaN	NaN	NaN	NaN	NaN	NaN	NaN	S				0.897797	126.68	89	1.12276	0	0	0.68854	NaN	NaN	WGPNMKPAVSNSPSPSPSAPSLTTGLGAKRM	_VSWGPNMKPAVSNS(ph)PSPS(ph)PSAPSLTTGLGAK_	P06105	S000003616	YJL080C	SCP160	S. cerevisiae protein involved in the Control of Ploidy	Essential RNA-binding G protein effector of mating response pathway; ligand-activated RNA-binding protein that delivers RNAs involved in polarization and perpetualizing mating signal to shmoo tip during pheromone signaling; Scp160p-mediated RNA trafficking essential for chemotropism and successful mating; mainly associated with nuclear envelope and ER, interacts in mRNA-dependent manner with tran…
-0.700193	-0.809828	-0.372618	-0.52085	-1.01424	-1.28044	0.732596	0.074988	NaN	NaN	NaN	NaN	S				1	190.57	13	2.07666	0.312273	0	-0.600872	-0.371773	NaN	___MSTEEQNGGGQKSLDDRQGEESQKGETS	_(ac)STEEQNGGGQKS(ph)LDDR_	P06244	S000003700	YJL164C	TPK1	Takashi's Protein Kinase	cAMP-dependent protein kinase catalytic subunit; promotes vegetative growth in response to nutrients via the Ras-cAMP signaling pathway; inhibited by regulatory subunit Bcy1p in the absence of cAMP; phosphorylates and inhibits Whi3p to promote G1/S phase passage; partially redundant with Tpk2p and Tpk3p; phosphorylates pre-Tom40p, which impairs its import into mitochondria under non-respiratory c…
0.375512	0.298072	-0.0443242	0.0632585	0.201383	0.0885487	0.0400518	0.698225	0.466653	0.0801119	-0.206018	-0.0988237	S				1	197.19	11	0.753554	0.728131	0.148953	0.17313	0.257052	0.0604809	_____MSNVVQARDNSQVFGVARIYASFNDT	_DNS(ph)QVFGVAR_	P06367	S000000627	YCR031C	RPS14A	Ribosomal Protein of the Small subunit	Protein component of the small (40S) ribosomal subunit; required for ribosome assembly and 20S pre-rRNA processing; mutations confer cryptopleurine resistance; homologous to mammalian ribosomal protein S14 and bacterial S11; RPS14A has a paralog, RPS14B, that arose from the whole genome duplication
0.0827026	-0.0434675	0.431618	0.438053	NaN	NaN	NaN	NaN	NaN	NaN	NaN	NaN	S				0.949334	40.725	563	0.793458	0	0	0.227226	NaN	NaN	FGRNNNRDYRKAGGASAGGWGSSRSRDNSFR	_AGGAS(ph)AGGWGSSR_	P06634	S000005730	YOR204W	DED1	DEaD-box protein	ATP-dependent DEAD (Asp-Glu-Ala-Asp)-box RNA helicase; required for translation initiation of all yeast mRNAs; mutations in human DEAD-box DBY are a frequent cause of male infertility; DED1 has a paralog, DBP1, that arose from the whole genome duplication
-0.00646329	-0.0495615	0.84231	0.581842	0.311619	0.119024	0.16741	0.368607	0.00733906	-0.284247	0.510868	0.691057	S				1	199.8	535	0.660756	1.58263	0.421384	0.342032	0.241665	0.231254	EANQEVPSFLKDAMMSAPGSRSNSRRGGFGR	_DAMMS(ph)APGS(ph)R_	P06634	S000005730	YOR204W	DED1	DEaD-box protein	ATP-dependent DEAD (Asp-Glu-Ala-Asp)-box RNA helicase; required for translation initiation of all yeast mRNAs; mutations in human DEAD-box DBY are a frequent cause of male infertility; DED1 has a paralog, DBP1, that arose from the whole genome duplication
0.146394	0.268794	0.736341	1.09996	1.09862	0.892663	1.10467	2.12463	0.0352017	-0.161524	0.576131	0.861867	S				1	175.21	539	1.08117	1.73994	0.58525	0.562872	1.30514	0.327919	EVPSFLKDAMMSAPGSRSNSRRGGFGRNNNR	_DAMMS(ph)APGS(ph)R_	P06634	S000005730	YOR204W	DED1	DEaD-box protein	ATP-dependent DEAD (Asp-Glu-Ala-Asp)-box RNA helicase; required for translation initiation of all yeast mRNAs; mutations in human DEAD-box DBY are a frequent cause of male infertility; DED1 has a paralog, DBP1, that arose from the whole genome duplication
-0.284669	-0.217088	0.253412	0.628586	1.03422	0.449641	NaN	NaN	-0.0421448	-0.108441	1.16686	1.31901	S				0.895338	126.8	541	0.162757	0.621758	0.649878	0.0950603	0.741928	0.583821	PSFLKDAMMSAPGSRSNSRRGGFGRNNNRDY	_DAM(ox)MSAPGS(ph)RS(ph)NS(ph)R_	P06634	S000005730	YOR204W	DED1	DEaD-box protein	ATP-dependent DEAD (Asp-Glu-Ala-Asp)-box RNA helicase; required for translation initiation of all yeast mRNAs; mutations in human DEAD-box DBY are a frequent cause of male infertility; DED1 has a paralog, DBP1, that arose from the whole genome duplication
-0.46564	-0.247885	1.44741	1.46112	0.637657	0.00647761	NaN	NaN	0.0659859	0.103397	1.16686	1.31901	S				0.999612	133.93	543	0.428905	0.306684	0.845984	0.548752	0.322067	0.663813	FLKDAMMSAPGSRSNSRRGGFGRNNNRDYRK	_DAMM(ox)SAPGS(ph)RSNS(ph)R_	P06634	S000005730	YOR204W	DED1	DEaD-box protein	ATP-dependent DEAD (Asp-Glu-Ala-Asp)-box RNA helicase; required for translation initiation of all yeast mRNAs; mutations in human DEAD-box DBY are a frequent cause of male infertility; DED1 has a paralog, DBP1, that arose from the whole genome duplication
NaN	NaN	NaN	NaN	NaN	NaN	-0.194717	0.0405711	NaN	NaN	NaN	NaN	S				0.93235	77.631	146	0	0.200126	0	NaN	-0.0770732	NaN	DASGKDVPEPITEFTSPPLDGLLLENIKLAR	_DVPEPITEFTS(ph)PPLDGLLLENIK_	P06634	S000005730	YOR204W	DED1	DEaD-box protein	ATP-dependent DEAD (Asp-Glu-Ala-Asp)-box RNA helicase; required for translation initiation of all yeast mRNAs; mutations in human DEAD-box DBY are a frequent cause of male infertility; DED1 has a paralog, DBP1, that arose from the whole genome duplication
0.148218	0.213129	NaN	NaN	NaN	NaN	NaN	NaN	-0.0431107	-0.179384	NaN	NaN	S				0.898539	114.88	527	0.946333	0	0.456117	0.180674	NaN	-0.111247	KGLHEILTEANQEVPSFLKDAMMSAPGSRSN	_GLHEILTEANQEVPS(ph)FLKDAMMS(ph)APGSRSNSR_	P06634	S000005730	YOR204W	DED1	DEaD-box protein	ATP-dependent DEAD (Asp-Glu-Ala-Asp)-box RNA helicase; required for translation initiation of all yeast mRNAs; mutations in human DEAD-box DBY are a frequent cause of male infertility; DED1 has a paralog, DBP1, that arose from the whole genome duplication
5.15749	5.12751	NaN	NaN	NaN	NaN	NaN	NaN	NaN	NaN	0.645751	2.74778	S				0.999936	261.63	37	2.73151	0	0.452157	5.1425	NaN	1.69676	VPPHLRGKPRSARNNSSNYNNNNGGYNGGRG	_NNS(ph)SNYNNNNGGYNGGR_	P06634	S000005730	YOR204W	DED1	DEaD-box protein	ATP-dependent DEAD (Asp-Glu-Ala-Asp)-box RNA helicase; required for translation initiation of all yeast mRNAs; mutations in human DEAD-box DBY are a frequent cause of male infertility; DED1 has a paralog, DBP1, that arose from the whole genome duplication
NaN	NaN	NaN	NaN	NaN	NaN	NaN	NaN	NaN	NaN	NaN	NaN	S				0.972955	85.974	210	0	0	0	NaN	NaN	NaN	GFLFPVLSESFKTGPSPQPESQGSFYQRKAY	_TGPS(ph)PQPESQGSFYQR_	P06634	S000005730	YOR204W	DED1	DEaD-box protein	ATP-dependent DEAD (Asp-Glu-Ala-Asp)-box RNA helicase; required for translation initiation of all yeast mRNAs; mutations in human DEAD-box DBY are a frequent cause of male infertility; DED1 has a paralog, DBP1, that arose from the whole genome duplication
NaN	NaN	-0.592828	-1.01464	NaN	NaN	-0.630965	-0.962586	0.0993626	0.480058	NaN	NaN	S				0.995987	115.36	23	0.786825	0.883998	0.43172	-0.803734	-0.796775	0.28971	YAVSKTSENKVSNTVSPTQDKDAIRKQPDDI	_TSENKVSNTVS(ph)PTQDKDAIR_	P06700	S000002200	YDL042C	SIR2	Silent Information Regulator	Conserved NAD+ dependent histone deacetylase of the Sirtuin family; involved in regulation of lifespan; plays roles in silencing at HML, HMR, telomeres, and the rDNA locus; negatively regulates initiation of DNA replication; functions as a regulator of autophagy like mammalian homolog SIRT1, and also of mitophagy; SIR2 has a paralog, HST1, that arose from the whole genome duplication
NaN	NaN	NaN	NaN	NaN	NaN	NaN	NaN	NaN	NaN	NaN	NaN	S				0.959143	67.668	56	0	0	0	NaN	NaN	NaN	NDEPSHKKIKVAQPDSLRETNTTDPLGHTKA	_VAQPDS(ph)LRETNTTDPLGHTK_	P06700	S000002200	YDL042C	SIR2	Silent Information Regulator	Conserved NAD+ dependent histone deacetylase of the Sirtuin family; involved in regulation of lifespan; plays roles in silencing at HML, HMR, telomeres, and the rDNA locus; negatively regulates initiation of DNA replication; functions as a regulator of autophagy like mammalian homolog SIRT1, and also of mitophagy; SIR2 has a paralog, HST1, that arose from the whole genome duplication
0.397803	-0.167766	0.339108	0.482513	0.245131	-0.266385	0.20563	0.429926	0.25181	-0.231667	-0.0352017	0.609773	S				0.974047	212.85	19	0.76779	0.424251	0.322446	0.262914	0.153575	0.148678	ASTSTTNDMITEEPTSPHQIPRLTRRLTGFL	_PPASTSTTNDMITEEPTS(ph)PHQIPR_	P06738	S000006364	YPR160W	GPH1	Glycogen PHosphorylase	Glycogen phosphorylase required for the mobilization of glycogen; non-essential; regulated by cyclic AMP-mediated phosphorylation; expression is regulated by stress-response elements and by the HOG MAP kinase pathway
NaN	NaN	-0.037312	-0.0705267	NaN	NaN	NaN	NaN	NaN	NaN	NaN	NaN	S				0.999964	59.893	52	0.720764	0	0	-0.0539193	NaN	NaN	QEKPIEMPLDMGKAPSPRGEDQRVTNEEDLF	_SPSLQEKPIEMPLDMGKAPS(ph)PR_	P06774	S000003206	YGL237C	HAP2	Heme Activator Protein	Subunit of the Hap2p/3p/4p/5p CCAAT-binding complex; complex is heme-activated and glucose-repressed; complex is a transcriptional activator and global regulator of respiratory gene expression; contains sequences sufficient for both complex assembly and DNA binding
-0.308073	-0.468911	NaN	NaN	0.18612	-0.61277	NaN	NaN	NaN	NaN	NaN	NaN	S				0.918524	138.46	302	0.886235	0.162584	0	-0.388492	-0.213325	NaN	SNVLTTEKDPVVAKQSPTASSNPEAEQITFV	_QS(ph)PTASSNPEAEQITFVTAK_	P06778	S000004494	YML032C	RAD52	RADiation sensitive	Protein that stimulates strand exchange; stimulates strand exchange by facilitating Rad51p binding to single-stranded DNA; anneals complementary single-stranded DNA; involved in the repair of double-strand breaks in DNA during vegetative growth and meiosis and UV induced sister chromatid recombination
NaN	NaN	NaN	NaN	0.202386	-0.259789	0.349842	0.439657	NaN	NaN	NaN	NaN	S				0.999448	263.83	85	0	0.489368	0	NaN	0.183024	NaN	SRVVEDEEIDEIGTGSGTETERAQVSYDARM	_VVEDEEIDEIGTGS(ph)GTETER_	P06779	S000003813	YJR052W	RAD7	RADiation sensitive	Nucleotide excision repair (NER) protein; binds damaged DNA during NER; binds DNA in an ATP-dependent manner (with Rad16p) during NER; required for repair of non-transcribed chromatin; subunit of Nucleotide Excision Repair Factor 4 (NEF4) and the Elongin-Cullin-Socs (ECS) ligase complex
0.18916	-0.000490578	-0.187514	0.252484	-0.110807	-0.325377	-0.137372	-0.0102069	0.1153	-0.336974	0.390964	0.266073	S				1	181.51	487	0.244928	0.946157	0.265506	0.0634098	-0.145941	0.108841	TSLPQIHRANMLAQGSPAASKISPLVTKKSK	_ANMLAQGS(ph)PAASK_	P06782	S000002885	YDR477W	SNF1	Sucrose NonFermenting	AMP-activated serine/threonine protein kinase; found in a complex containing Snf4p and members of the Sip1p/Sip2p/Gal83p family; required for transcription of glucose-repressed genes, thermotolerance, sporulation, and peroxisome biogenesis; involved in regulation of the nucleocytoplasmic shuttling of Hxk2p; regulates filamentous growth in response to starvation; SUMOylation by Mms21p inhibits its…
NaN	NaN	NaN	NaN	0.0842003	-0.104666	0.101428	0.079036	0.0316775	-0.215379	0.258874	0.374991	S				0.973294	123.63	413	0	0.328232	0.344956	NaN	0.0399994	0.112541	ANKSVSDELDTFLSQSPPTFQQQSKSHQKSQ	_SVSDELDTFLSQS(ph)PPTFQQQSK_	P06782	S000002885	YDR477W	SNF1	Sucrose NonFermenting	AMP-activated serine/threonine protein kinase; found in a complex containing Snf4p and members of the Sip1p/Sip2p/Gal83p family; required for transcription of glucose-repressed genes, thermotolerance, sporulation, and peroxisome biogenesis; involved in regulation of the nucleocytoplasmic shuttling of Hxk2p; regulates filamentous growth in response to starvation; SUMOylation by Mms21p inhibits its…
NaN	NaN	NaN	NaN	NaN	NaN	NaN	NaN	NaN	NaN	NaN	NaN	S				1	94.688	1370	0	0	0	NaN	NaN	NaN	ESDLEILDSYTDREDSNKDEDDAIPQRSRRQ	_EDS(ph)NKDEDDAIPQR_	P06786	S000005032	YNL088W	TOP2	TOPoisomerase	Topoisomerase II; relieves torsional strain in DNA by cleaving and re-sealing the phosphodiester backbone of both positively and negatively supercoiled DNA; cleaves complementary strands; localizes to axial cores in meiosis; required for replication slow zone (RSZ) breakage following Mec1p inactivation
0.592349	0.792772	NaN	NaN	0.464459	0.688404	-0.8279	-0.379732	1.03816	3.15509	NaN	NaN	S				0.84469	122.44	1307	1.03866	0.0124613	0.526324	0.692561	-0.0136922	2.09662	KFKKISTIFDKMGSTSATSKENTPEQDDVAT	_MGSTS(ph)ATS(ph)KENTPEQDDVATK_	P06786	S000005032	YNL088W	TOP2	TOPoisomerase	Topoisomerase II; relieves torsional strain in DNA by cleaving and re-sealing the phosphodiester backbone of both positively and negatively supercoiled DNA; cleaves complementary strands; localizes to axial cores in meiosis; required for replication slow zone (RSZ) breakage following Mec1p inactivation
0.592349	0.792772	NaN	NaN	0.307312	0.590051	-0.437228	-0.0928839	1.03816	3.15509	NaN	NaN	S				0.994677	151.84	1310	1.03866	0.148211	0.526324	0.692561	0.0918129	2.09662	KISTIFDKMGSTSATSKENTPEQDDVATKKN	_M(ox)GSTSATS(ph)KENT(ph)PEQDDVATKK_	P06786	S000005032	YNL088W	TOP2	TOPoisomerase	Topoisomerase II; relieves torsional strain in DNA by cleaving and re-sealing the phosphodiester backbone of both positively and negatively supercoiled DNA; cleaves complementary strands; localizes to axial cores in meiosis; required for replication slow zone (RSZ) breakage following Mec1p inactivation
NaN	NaN	NaN	NaN	0.215368	-0.792307	NaN	NaN	NaN	NaN	NaN	NaN	S				0.901601	119.45	322	0	0.174596	0	NaN	-0.28847	NaN	LQIPPLPLKLLTPVPSDIDISRAQQPKLINQ	_LLTPVPS(ph)DIDISR_	P07245	S000003436	YGR204W	ADE3	ADEnine requiring	Cytoplasmic trifunctional enzyme C1-tetrahydrofolate synthase; involved in single carbon metabolism and required for biosynthesis of purines, thymidylate, methionine, and histidine; null mutation causes auxotrophy for adenine and histidine
0.784169	0.286645	NaN	NaN	NaN	NaN	NaN	NaN	NaN	NaN	NaN	NaN	S				0.964436	97.776	230	0.557683	0	0	0.535407	NaN	NaN	ANVKRKYLKKLTRRASFSAQSASSYALPDQS	_RAS(ph)FSAQSASSYALPDQSSLEQHPK_	P07248	S000002624	YDR216W	ADR1	Alcohol Dehydrogenase Regulator	Carbon source-responsive zinc-finger transcription factor; required for transcription of the glucose-repressed gene ADH2, of peroxisomal protein genes, and of genes required for ethanol, glycerol, and fatty acid utilization
NaN	NaN	1.29354	0.381555	NaN	NaN	NaN	NaN	NaN	NaN	NaN	NaN	S				0.874143	115.73	95	0.498401	0	0	0.837545	NaN	NaN	EQSGDAALLKIDERLSDSTDNLDSIPVKSEK	_LS(ph)DSTDNLDSIPVK_	P07250	S000002580	YDR173C	ARG82	ARGinine requiring	Inositol polyphosphate multikinase (IPMK); sequentially phosphorylates Ins(1,4,5)P3 to form Ins(1,3,4,5,6)P5; also has diphosphoinositol polyphosphate synthase activity; regulates arginine-, phosphate-, and nitrogen-responsive genes
-0.151394	0.0639171	1.60353	0.921144	-0.124881	-0.278969	1.18288	0.75465	-0.171758	-0.575099	1.9215	0.976503	S				0.976783	173.56	97	0.640297	0.45107	0.384691	0.6093	0.383421	0.537786	SGDAALLKIDERLSDSTDNLDSIPVKSEKSK	_LSDS(ph)TDNLDSIPVKSEK_	P07250	S000002580	YDR173C	ARG82	ARGinine requiring	Inositol polyphosphate multikinase (IPMK); sequentially phosphorylates Ins(1,4,5)P3 to form Ins(1,3,4,5,6)P5; also has diphosphoinositol polyphosphate synthase activity; regulates arginine-, phosphate-, and nitrogen-responsive genes
-0.142242	-0.110854	0.630483	0.249582	-0.225734	-0.100639	0.346793	0.551818	0.192068	-0.117396	0.0607132	0.18097	S				1	252.1	15	0.346131	0.307656	0.453625	0.156743	0.14306	0.0790887	_MSVEEVSKKFEENVSVDDTTATPKTVLSDS	_KFEENVS(ph)VDDTTATPK_	P07260	S000005499	YOL139C	CDC33	Cell Division Cycle	mRNA cap binding protein and translation initiation factor eIF4E; the eIF4E-cap complex is responsible for mediating cap-dependent mRNA translation via interactions with translation initiation factor eIF4G (Tif4631p or Tif4632p); protein abundance increases in response to DNA replication stress; mutants are defective for adhesion and pseudohyphal growth
-0.114488	0.380175	0.461422	-0.257614	3.47716	-0.707831	NaN	NaN	-0.914276	-0.758575	NaN	NaN	S				0.934861	273.99	487	0.253745	0.202146	1.22853	0.117374	1.38466	-0.836425	HFVDIREFEYKDQDQSSPKVEVTSEDEKELE	_EFEYKDQDQS(ph)SPK_	P07264	S000002977	YGL009C	LEU1	LEUcine biosynthesis	Isopropylmalate isomerase; catalyzes the second step in the leucine biosynthesis pathway
1.38101	-0.4922	0.43154	-0.281669	-0.38163	-0.449651	0.805308	3.44028	-0.914276	-0.758575	0.504121	-0.302992	S				0.997095	264.52	488	0.234662	0.379828	0.479632	0.259669	0.853577	-0.36793	FVDIREFEYKDQDQSSPKVEVTSEDEKELES	_DQDQSS(ph)PKVEVTS(ph)EDEK_	P07264	S000002977	YGL009C	LEU1	LEUcine biosynthesis	Isopropylmalate isomerase; catalyzes the second step in the leucine biosynthesis pathway
-0.431462	-0.0188341	0.324871	-0.36793	-0.429673	-0.245335	0.0758393	-0.44615	-0.973526	-0.674015	NaN	NaN	S				0.999973	270.95	495	0.274702	0.920388	0.941261	-0.123339	-0.26133	-0.82377	EYKDQDQSSPKVEVTSEDEKELESAAYDHAE	_DQDQSS(ph)PKVEVTS(ph)EDEK_	P07264	S000002977	YGL009C	LEU1	LEUcine biosynthesis	Isopropylmalate isomerase; catalyzes the second step in the leucine biosynthesis pathway
NaN	NaN	NaN	NaN	NaN	NaN	2.56602	2.11329	NaN	NaN	NaN	NaN	S				1	146.77	748	0	1.21181	0	NaN	2.33965	NaN	EEYISRYEALRREKYSFLEGGSKLLKFDNVP	_EKYS(ph)FLEGGSK_	P07264	S000002977	YGL009C	LEU1	LEUcine biosynthesis	Isopropylmalate isomerase; catalyzes the second step in the leucine biosynthesis pathway
1.05769	1.1145	-0.439995	0.285952	0.753605	0.707083	-0.449535	0.427091	1.10849	1.19371	NaN	NaN	S				0.999155	173.72	152	0.579894	0.540436	1.62793	0.504538	0.359561	1.1511	STTSANKVTKNKSNSSPYLNKRRGKPGPDSA	_SNSS(ph)PYLNK_	P07270	S000001930	YFR034C	PHO4	PHOsphate metabolism	Basic helix-loop-helix (bHLH) transcription factor of the myc-family; activates transcription cooperatively with Pho2p in response to phosphate limitation; binding to 'CACGTG' motif is regulated by chromatin restriction, competitive binding of Cbf1p to the same DNA binding motif and cooperation with Pho2p; function is regulated by phosphorylation at multiple sites and by phosphate availability
1.74507	1.76163	-0.528871	0.782596	1.9735	1.94759	NaN	NaN	1.62943	1.78228	NaN	NaN	S				0.905266	153.81	242	0.743875	2.37607	1.5451	0.940104	1.96055	1.70585	APHGSSHSRSLSKRRSSGALVDDDKRESHKH	_S(ph)SGALVDDDKR_	P07270	S000001930	YFR034C	PHO4	PHOsphate metabolism	Basic helix-loop-helix (bHLH) transcription factor of the myc-family; activates transcription cooperatively with Pho2p in response to phosphate limitation; binding to 'CACGTG' motif is regulated by chromatin restriction, competitive binding of Cbf1p to the same DNA binding motif and cooperation with Pho2p; function is regulated by phosphorylation at multiple sites and by phosphate availability
NaN	NaN	NaN	NaN	NaN	NaN	NaN	NaN	NaN	NaN	NaN	NaN	S				1	32.858	2	0	0	0	NaN	NaN	NaN	______________MSLPFLTSAPGKVIIFG	_(ac)M(ox)S(ph)LPFLT(ph)S(ph)APGK_	P07277	S000004821	YMR208W	ERG12	ERGosterol biosynthesis	Mevalonate kinase; acts in the biosynthesis of isoprenoids and sterols, including ergosterol, from mevalonate
NaN	NaN	NaN	NaN	NaN	NaN	NaN	NaN	NaN	NaN	NaN	NaN	S				1	32.858	8	0	0	0	NaN	NaN	NaN	________MSLPFLTSAPGKVIIFGEHSAVY	_(ac)M(ox)S(ph)LPFLT(ph)S(ph)APGK_	P07277	S000004821	YMR208W	ERG12	ERGosterol biosynthesis	Mevalonate kinase; acts in the biosynthesis of isoprenoids and sterols, including ergosterol, from mevalonate
-0.827436	-1.12365	NaN	NaN	NaN	NaN	2.1298	2.15682	NaN	NaN	NaN	NaN	S				0.826739	71.376	70	1.01809	2.39651	0	-0.975545	2.14331	NaN	KAKNIVLFPEPEESFSRPQSAQSQSRSRSSV	_NIVLFPEPEESFS(ph)RPQS(ph)AQS(ph)QSR_	P07278	S000001295	YIL033C	BCY1	Bypass of CYclic-AMP requirement	Regulatory subunit of the cyclic AMP-dependent protein kinase (PKA); PKA is a component of a signaling pathway that controls a variety of cellular processes, including metabolism, cell cycle, stress response, stationary phase, and sporulation
-0.827436	-1.12365	NaN	NaN	-0.0398145	-0.235042	NaN	NaN	NaN	NaN	NaN	NaN	S				0.826974	72.359	77	1.01809	0.405414	0	-0.975545	-0.137429	NaN	FPEPEESFSRPQSAQSQSRSRSSVMFKSPFV	_NIVLFPEPEESFSRPQS(ph)AQS(ph)QS(ph)R_	P07278	S000001295	YIL033C	BCY1	Bypass of CYclic-AMP requirement	Regulatory subunit of the cyclic AMP-dependent protein kinase (PKA); PKA is a component of a signaling pathway that controls a variety of cellular processes, including metabolism, cell cycle, stress response, stationary phase, and sporulation
-0.827436	-1.12365	NaN	NaN	0.388575	0.135666	NaN	NaN	NaN	NaN	NaN	NaN	S				0.826974	72.359	79	1.01809	0.543398	0	-0.975545	0.262121	NaN	EPEESFSRPQSAQSQSRSRSSVMFKSPFVNE	_NIVLFPEPEESFSRPQS(ph)AQS(ph)QS(ph)R_	P07278	S000001295	YIL033C	BCY1	Bypass of CYclic-AMP requirement	Regulatory subunit of the cyclic AMP-dependent protein kinase (PKA); PKA is a component of a signaling pathway that controls a variety of cellular processes, including metabolism, cell cycle, stress response, stationary phase, and sporulation
-0.357197	-0.337558	0.363772	-0.204266	NaN	NaN	NaN	NaN	-0.560175	-0.946833	-0.200504	-0.420725	S				0.862921	173.01	145	0.312444	0	1.36963	-0.133812	NaN	-0.532059	STPPLPMHFNAQRRTSVSGETLQPNNFDDWT	_RTS(ph)VSGETLQPNNFDDWTPDHYK_	P07278	S000001295	YIL033C	BCY1	Bypass of CYclic-AMP requirement	Regulatory subunit of the cyclic AMP-dependent protein kinase (PKA); PKA is a component of a signaling pathway that controls a variety of cellular processes, including metabolism, cell cycle, stress response, stationary phase, and sporulation
-1.15451	-1.17215	-1.58405	-2.28795	-0.840345	-1.0013	0.76545	0.0852518	-1.08795	-1.70223	-1.94028	-2.20571	S				0.999986	120.53	83	1.99984	0.227885	2.26927	-1.54966	-0.247736	-1.73404	SFSRPQSAQSQSRSRSSVMFKSPFVNEDPHS	_SRS(ph)S(ph)VM(ox)FK_	P07278	S000001295	YIL033C	BCY1	Bypass of CYclic-AMP requirement	Regulatory subunit of the cyclic AMP-dependent protein kinase (PKA); PKA is a component of a signaling pathway that controls a variety of cellular processes, including metabolism, cell cycle, stress response, stationary phase, and sporulation
NaN	NaN	-1.59956	-2.51372	-2.09919	-2.3055	1.93159	0.261863	-2.88183	NaN	-1.21866	-2.99467	S				0.999999	120.53	84	0.856286	0.205496	1.26613	-2.05664	-0.552809	-2.36505	FSRPQSAQSQSRSRSSVMFKSPFVNEDPHSN	_SRS(ph)S(ph)VM(ox)FK_	P07278	S000001295	YIL033C	BCY1	Bypass of CYclic-AMP requirement	Regulatory subunit of the cyclic AMP-dependent protein kinase (PKA); PKA is a component of a signaling pathway that controls a variety of cellular processes, including metabolism, cell cycle, stress response, stationary phase, and sporulation
NaN	NaN	NaN	NaN	NaN	NaN	0.551099	0.512473	NaN	NaN	NaN	NaN	S				0.999026	145.69	240	0	1.63619	0	NaN	0.531786	NaN	YEIFVDERTIGHSVQSPDDTVKILTELFNL_	_TIGHSVQS(ph)PDDTVK_	P07283	S000001849	YFL045C	SEC53	SECretory	Phosphomannomutase; involved in synthesis of GDP-mannose and dolichol-phosphate-mannose; required for folding and glycosylation of secretory proteins in the ER lumen
-0.126187	-0.11738	-0.135141	-0.817214	0.0457225	-0.0545421	-0.396598	-1.1117	NaN	NaN	NaN	NaN	S				1	150.68	201	0.739937	0.613797	0	-0.29898	-0.379279	NaN	SNKLVGVGNGKEGNISINSGSGNSSKSNCC_	_EGNIS(ph)INS(ph)GSGNSSK_	P07560	S000001889	YFL005W	SEC4	SECretory	Rab family GTPase; essential for vesicle-mediated exocytic secretion and autophagy; associates with the exocyst component Sec15p and may regulate polarized delivery of transport vesicles to the exocyst at the plasma membrane
-0.814184	-1.01409	NaN	NaN	-0.619913	-0.574047	1.12787	-0.466131	NaN	NaN	2.62798	-0.300182	S				0.970966	180.78	204	1.15905	0.111842	0.242297	-0.914138	-0.133055	1.1639	LVGVGNGKEGNISINSGSGNSSKSNCC____	_EGNIS(ph)INS(ph)GSGNSSK_	P07560	S000001889	YFL005W	SEC4	SECretory	Rab family GTPase; essential for vesicle-mediated exocytic secretion and autophagy; associates with the exocyst component Sec15p and may regulate polarized delivery of transport vesicles to the exocyst at the plasma membrane
0.602932	1.30702	NaN	NaN	NaN	NaN	NaN	NaN	1.16672	1.43531	-1.95758	-0.015212	S				0.988549	93.804	8	0.648118	0	0.069762	0.954976	NaN	0.157308	________MSGLRTVSASSGNGKSYDSIMKI	_TVS(ph)ASS(ph)GNGKSYDSIMK_	P07560	S000001889	YFL005W	SEC4	SECretory	Rab family GTPase; essential for vesicle-mediated exocytic secretion and autophagy; associates with the exocyst component Sec15p and may regulate polarized delivery of transport vesicles to the exocyst at the plasma membrane
0.602932	1.30702	NaN	NaN	NaN	NaN	NaN	NaN	0.876645	1.15478	-1.95758	-0.015212	S				0.90166	93.804	11	0.648118	0	0.00670555	0.954976	NaN	0.0146575	_____MSGLRTVSASSGNGKSYDSIMKILLI	_TVSASS(ph)GNGKSYDSIMK_	P07560	S000001889	YFL005W	SEC4	SECretory	Rab family GTPase; essential for vesicle-mediated exocytic secretion and autophagy; associates with the exocyst component Sec15p and may regulate polarized delivery of transport vesicles to the exocyst at the plasma membrane
-0.330774	-0.0993862	NaN	NaN	-0.377163	-0.312957	0.344007	-0.43189	NaN	NaN	NaN	NaN	S				1	103.73	707	0.50282	0.441755	0	-0.21508	-0.194501	NaN	CHSLVRDAQGRKMSKSLGNVIDPLDVITGIK	_S(ph)LGNVIDPLDVITGIK_	P07806	S000003326	YGR094W	VAS1	VAlyl-tRNA Synthetase	Mitochondrial and cytoplasmic valyl-tRNA synthetase
-0.531698	-0.316115	1.32377	0.0379323	-0.428779	-0.335444	0.875354	-0.309293	-0.724969	-0.629367	0.609641	-0.0739573	S				0.99263	214.47	689	0.109391	0.0540649	0.25749	0.128472	-0.0495405	-0.204663	TKKSRKVRNIVNNTDSPTLKTKTGFLNLREF	_NIVNNTDS(ph)PTLK_	P07866	S000000022	YAL024C	LTE1	Low Temperature Essential	Protein similar to GDP/GTP exchange factors; without detectable GEF activity; required for asymmetric localization of Bfa1p at daughter-directed spindle pole bodies and for mitotic exit at low temperatures
0.0727232	0.0698396	NaN	NaN	NaN	NaN	NaN	NaN	-0.453143	-0.552579	-0.23952	-0.147176	S				0.947769	79.935	34	1.89025	0	1.47138	0.0712814	NaN	-0.348105	EPSYELQNAHSGLFHSSNEELTNRNQRYTNQ	_KNEPSYELQNAHSGLFHS(ph)S(ph)NEELTNR_	P08004	S000005136	YNL192W	CHS1	CHitin Synthase	Chitin synthase I; requires activation from zymogenic form in order to catalyze the transfer of N-acetylglucosamine (GlcNAc) to chitin; required for repairing the chitin septum during cytokinesis; transcription activated by mating factor
0.0727232	0.0698396	NaN	NaN	NaN	NaN	NaN	NaN	NaN	NaN	-0.23952	-0.147176	S				0.947769	79.935	35	1.89025	0	0.82614	0.0712814	NaN	-0.193348	PSYELQNAHSGLFHSSNEELTNRNQRYTNQN	_KNEPSYELQNAHSGLFHS(ph)S(ph)NEELTNR_	P08004	S000005136	YNL192W	CHS1	CHitin Synthase	Chitin synthase I; requires activation from zymogenic form in order to catalyze the transfer of N-acetylglucosamine (GlcNAc) to chitin; required for repairing the chitin septum during cytokinesis; transcription activated by mating factor
0.63264	1.66293	-1.93972	-0.826681	NaN	NaN	NaN	NaN	NaN	NaN	NaN	NaN	S				1	189.77	270	0.049884	0	0	-0.117705	NaN	NaN	LGRNGEMVDPYDYENSLRHMTPMERREYLHD	_NGEMVDPYDYENS(ph)LR_	P08004	S000005136	YNL192W	CHS1	CHitin Synthase	Chitin synthase I; requires activation from zymogenic form in order to catalyze the transfer of N-acetylglucosamine (GlcNAc) to chitin; required for repairing the chitin septum during cytokinesis; transcription activated by mating factor
-0.364255	-0.20146	-0.12075	-0.213627	0.601697	0.577441	NaN	NaN	-0.237047	-0.29736	0.794207	0.569158	S				0.868356	105.03	68	1.67052	1.88293	0.292338	-0.225023	0.589569	0.207239	RVKAFQEQRALKRSASVGSNQSEQDKGSSQS	_SAS(ph)VGSNQSEQDKGSSQSPK_	P08018	S000003664	YJL128C	PBS2	Polymyxin B Sensitivity	MAP kinase kinase of the HOG signaling pathway; activated under severe osmotic stress; mitophagy-specific regulator; plays a role in regulating Ty1 transposition
0.918539	0.914488	NaN	NaN	1.32792	1.05262	NaN	NaN	1.22565	1.25725	0.794207	0.569158	S				0.980189	72.499	71	2.85173	1.13493	1.97447	0.916513	1.19027	0.961566	AFQEQRALKRSASVGSNQSEQDKGSSQSPKH	_SAS(ph)VGS(ph)NQSEQDKGSSQSPK_	P08018	S000003664	YJL128C	PBS2	Polymyxin B Sensitivity	MAP kinase kinase of the HOG signaling pathway; activated under severe osmotic stress; mitophagy-specific regulator; plays a role in regulating Ty1 transposition
NaN	NaN	NaN	NaN	-0.396859	-1.81543	NaN	NaN	NaN	NaN	NaN	NaN	S				0.898713	68.97	17	0	0.440108	0	NaN	-1.10614	NaN	EDKFANLSLHEKTGKSSIQLNEQTGSDNGSA	_TGKS(ph)SIQLNEQTGSDNGSAVKR_	P08018	S000003664	YJL128C	PBS2	Polymyxin B Sensitivity	MAP kinase kinase of the HOG signaling pathway; activated under severe osmotic stress; mitophagy-specific regulator; plays a role in regulating Ty1 transposition
1.18821	1.03415	-0.727093	1.27572	1.50019	1.52301	-1.29331	0.624132	1.54473	0.620117	NaN	NaN	S				0.998878	186.87	492	0.61707	0.357502	0.590114	0.692745	0.588505	1.08242	EENEPESRFVISETPSPVLKSQSKYEGRSPQ	_FVISETPS(ph)PVLK_	P08153	S000002553	YDR146C	SWI5	SWItching deficient	Transcription factor that recruits Mediator and Swi/Snf complexes; activates transcription of genes expressed at the M/G1 phase boundary and in G1 phase; required for expression of the HO gene controlling mating type switching; localization to nucleus occurs during G1 and appears to be regulated by phosphorylation by Cdc28p kinase; SWI5 has a paralog, ACE2, that arose from the whole genome duplic…
1.14287	1.0072	-0.570171	0.598544	0.563646	0.525969	0.289792	0.584068	0.864572	0.709555	3.55236	0.610521	S				0.99758	141.23	46	0.591461	2.25934	0.866831	0.54461	0.490869	1.43425	GYASDEVGGTLSRRASSIFSINTTPLAPPNA	_RAS(ph)S(ph)IFS(ph)INTTPLAPPNATDIQK_	P08456	S000000828	YER026C	CHO1	CHOline requiring	Phosphatidylserine synthase; functions in phospholipid biosynthesis; catalyzes the reaction CDP-diaclyglycerol + L-serine = CMP + L-1-phosphatidylserine, transcriptionally repressed by myo-inositol and choline
1.14287	1.0072	0.28179	0.864255	0.201634	0.0611541	0.289792	0.584068	0.864572	0.709555	3.55236	0.610521	S				0.99758	141.23	47	1.64869	1.0842	0.866831	0.824028	0.284162	1.43425	YASDEVGGTLSRRASSIFSINTTPLAPPNAT	_RAS(ph)S(ph)IFS(ph)INTTPLAPPNATDIQK_	P08456	S000000828	YER026C	CHO1	CHOline requiring	Phosphatidylserine synthase; functions in phospholipid biosynthesis; catalyzes the reaction CDP-diaclyglycerol + L-serine = CMP + L-1-phosphatidylserine, transcriptionally repressed by myo-inositol and choline
0.139601	-0.187099	NaN	NaN	0.285343	0.256286	-0.177982	0.0133488	NaN	NaN	NaN	NaN	S				1	310.4	34	0.041873	0.344823	0	-0.0237494	0.0942491	NaN	DVIVNEHRDENDGYASDEVGGTLSRRASSIF	_DENDGYAS(ph)DEVGGTLSR_	P08456	S000000828	YER026C	CHO1	CHOline requiring	Phosphatidylserine synthase; functions in phospholipid biosynthesis; catalyzes the reaction CDP-diaclyglycerol + L-serine = CMP + L-1-phosphatidylserine, transcriptionally repressed by myo-inositol and choline
0.786931	0.604166	NaN	NaN	0.77804	0.173255	-0.443182	0.107368	NaN	NaN	NaN	NaN	S				0.997503	137.24	42	1.08007	0.235491	0	0.695549	0.15387	NaN	DENDGYASDEVGGTLSRRASSIFSINTTPLA	_DENDGYAS(ph)DEVGGTLS(ph)R_	P08456	S000000828	YER026C	CHO1	CHOline requiring	Phosphatidylserine synthase; functions in phospholipid biosynthesis; catalyzes the reaction CDP-diaclyglycerol + L-serine = CMP + L-1-phosphatidylserine, transcriptionally repressed by myo-inositol and choline
-0.247371	-0.321063	-0.054779	-0.00432164	0.316957	0.268075	0.0556663	0.135966	-0.324545	-0.519818	0.321369	0.181051	S				1	160.43	4	0.885778	1.31994	0.155786	-0.156884	0.194166	-0.0854856	____________MVESDEDFAPQEFPHTDTD	_VES(ph)DEDFAPQEFPHTDTDVIVNEHR_	P08456	S000000828	YER026C	CHO1	CHOline requiring	Phosphatidylserine synthase; functions in phospholipid biosynthesis; catalyzes the reaction CDP-diaclyglycerol + L-serine = CMP + L-1-phosphatidylserine, transcriptionally repressed by myo-inositol and choline
NaN	NaN	NaN	NaN	NaN	NaN	0.428411	0.0760826	NaN	NaN	NaN	NaN	S				0.999947	58.37	2	0	0.411048	0	NaN	0.252247	NaN	______________MSDLANSEKYYDEDPYG	_(ac)S(ph)DLANSEK_	P08518	S000005677	YOR151C	RPB2	RNA Polymerase B	RNA polymerase II second largest subunit B150; part of central core; similar to bacterial beta subunit
NaN	NaN	NaN	NaN	0.00173014	-0.0864461	0.21791	0.166632	NaN	NaN	NaN	NaN	S				0.842806	63.578	199	0	0.434413	0	NaN	0.0749566	NaN	DAETVTQNEDADRNNSSRINLQDICKDLNQE	_SDTDRDAETVTQNEDADRNNS(ph)SR_	P08539	S000001047	YHR005C	GPA1	G Protein Alpha subunit	Subunit of the G protein involved in pheromone response; GTP-binding alpha subunit of the heterotrimeric G protein; negatively regulates the mating pathway by sequestering G(beta)gamma and by triggering an adaptive response; activates Vps34p at the endosome; protein abundance increases in response to DNA replication stress
NaN	NaN	NaN	NaN	NaN	NaN	NaN	NaN	NaN	NaN	NaN	NaN	S				1	92.19	772	0	0	0	NaN	NaN	NaN	QVANTISYRGILNKMSPREQLNHANLDSSVS	_GILNKMS(ph)PR_	P08638	S000004443	YLR451W	LEU3	LEUcine biosynthesis	Zinc-knuckle transcription factor, repressor and activator; regulates genes involved in branched chain amino acid biosynthesis and ammonia assimilation; acts as a repressor in leucine-replete conditions and as an activator in the presence of alpha-isopropylmalate, an intermediate in leucine biosynthesis that accumulates during leucine starvation
-0.0131304	-0.107539	NaN	NaN	NaN	NaN	NaN	NaN	0.158596	0.000432815	NaN	NaN	S				0.988246	205.95	28	0.374017	0	0.302542	-0.0603347	NaN	0.0795142	GPQRQEEQEQQIEQSSPTEANDRSIHDEVPK	_QEEQEQQIEQSS(ph)PTEANDR_	P08678	S000003542	YJL005W	CYR1	CYclic AMP Requirement	Adenylate cyclase; required for cAMP production and cAMP-dependent protein kinase signaling; the cAMP pathway controls a variety of cellular processes, including metabolism, cell cycle, stress response, stationary phase, and sporulation
NaN	NaN	0.734731	0.557072	0.0282862	-0.227793	0.205464	-0.142871	-0.161992	-0.155293	NaN	NaN	S				0.839683	109.04	486	1.06045	0.1278	1.87161	0.645902	-0.0342286	-0.158643	KRKKTKPKGRSKSRRSSIDADELDPMSPGPP	_RS(ph)SIDADELDPMSPGPPSK_	P08678	S000003542	YJL005W	CYR1	CYclic AMP Requirement	Adenylate cyclase; required for cAMP production and cAMP-dependent protein kinase signaling; the cAMP pathway controls a variety of cellular processes, including metabolism, cell cycle, stress response, stationary phase, and sporulation
-0.0607885	-0.0619326	0.467294	0.376395	0.00345838	-0.163058	0.0226102	0.0014001	-0.157222	-0.524313	0.390434	0.384885	S				0.994991	140.2	487	0.53718	0.308928	0.034807	0.180242	-0.0338973	0.0234459	RKKTKPKGRSKSRRSSIDADELDPMSPGPPS	_RSS(ph)IDADELDPMSPGPPSKK_	P08678	S000003542	YJL005W	CYR1	CYclic AMP Requirement	Adenylate cyclase; required for cAMP production and cAMP-dependent protein kinase signaling; the cAMP pathway controls a variety of cellular processes, including metabolism, cell cycle, stress response, stationary phase, and sporulation
NaN	NaN	-2.26541	-0.318809	NaN	NaN	NaN	NaN	NaN	NaN	-1.40866	-0.487692	S				0.999868	71.548	1171	0.386165	0	0.540882	-1.29211	NaN	-0.948175	NFQRETKEQEQKKRNSLVESLNDSKIKELEA	_KRNS(ph)LVESLNDSK_	P08964	S000001065	YHR023W	MYO1	MYOsin	Type II myosin heavy chain; required for wild-type cytokinesis and cell separation; localizes to the actomyosin ring; binds to myosin light chains Mlc1p and Mlc2p through its IQ1 and IQ2 motifs respectively
0.596554	1.01863	-0.0976109	0.248382	0.413811	0.741575	0.198543	0.223121	0.396488	1.21064	NaN	NaN	S				0.99997	120.06	296	0.791065	1.28845	0.525036	0.44149	0.394263	0.803563	SFELCQLLKLGPQSMSRQASFKDPFTGNQQQ	_LGPQSM(ox)S(ph)R_	P09032	S000005786	YOR260W	GCD1	General Control Derepressed	Gamma subunit of the translation initiation factor eIF2B; the guanine-nucleotide exchange factor for eIF2; activity subsequently regulated by phosphorylated eIF2; first identified as a negative regulator of GCN4 expression
-0.585237	-0.769846	1.01715	0.126014	-0.562815	-0.764077	1.30861	0.490558	NaN	NaN	1.01663	0.236605	S				1	169.37	112	0.043663	0.0848108	0.450473	-0.0529787	0.118069	0.626617	EKELAKAGLDNVDAESKEGTPSANSSIQQEV	_AGLDNVDAES(ph)K_	P09064	S000006158	YPL237W	SUI3	SUppressor of Initiator codon	Beta subunit of the translation initiation factor eIF2; involved in the identification of the start codon; proposed to be involved in mRNA binding
-1.04079	-0.825057	0.963757	0.183458	-0.769182	-0.850168	0.741734	-0.139077	-1.1656	-1.06933	1.67167	0.507542	S				0.999826	164.15	92	0.139583	0.268045	0.0065859	-0.179659	-0.254173	-0.013929	GELSLKKKKKKTKDSSVDAFEKELAKAGLDN	_DSS(ph)VDAFEK_	P09064	S000006158	YPL237W	SUI3	SUppressor of Initiator codon	Beta subunit of the translation initiation factor eIF2; involved in the identification of the start codon; proposed to be involved in mRNA binding
-0.740336	-0.887206	1.1449	0.0284841	-0.758184	-0.686893	0.994844	-0.0321009	-0.75816	-0.964601	1.19129	0.0451039	S				1	142.45	40	0.0846711	0.10463	0.0863898	-0.113539	-0.120584	-0.121591	IPDDFDAAVNGKENGSGDDLFAGLKKKKKKS	_VIPDDFDAAVNGKENGS(ph)GDDLFAGLKK_	P09064	S000006158	YPL237W	SUI3	SUppressor of Initiator codon	Beta subunit of the translation initiation factor eIF2; involved in the identification of the start codon; proposed to be involved in mRNA binding
-1.03549	-1.04379	0.54981	-0.240131	-0.620645	-0.515707	0.720184	-0.0840642	-0.697804	-0.5327	1.05409	0.393311	S				0.815737	186.94	2	0.482525	0.149311	0.0441523	-0.442401	-0.125058	0.0542251	______________MSSDLAAELGFDPALKK	_(ac)S(ph)SDLAAELGFDPALK_	P09064	S000006158	YPL237W	SUI3	SUppressor of Initiator codon	Beta subunit of the translation initiation factor eIF2; involved in the identification of the start codon; proposed to be involved in mRNA binding
0.123534	0.0538064	0.376751	0.301177	0.0137839	0.0103502	0.471969	0.319406	0.0398403	-0.112943	0.48346	0.241748	S				1	222.6	15	1.18342	0.758272	0.528566	0.213817	0.203877	0.163026	_MPKETPSKAAADALSDLEIKDSKSNLNKEL	_AAADALS(ph)DLEIKDSK_	P09938	S000003563	YJL026W	RNR2	RiboNucleotide Reductase	Ribonucleotide-diphosphate reductase (RNR), small subunit; the RNR complex catalyzes the rate-limiting step in dNTP synthesis and is regulated by DNA replication and DNA damage checkpoint pathways via localization of the small subunits; RNR2 has a paralog, RNR4, that arose from the whole genome duplication
NaN	NaN	NaN	NaN	0.336169	0.917928	NaN	NaN	NaN	NaN	NaN	NaN	S				0.999945	226.99	176	0	0.558288	0	NaN	0.627049	NaN	PLKKLKIDTSVIDAESDSTPNTARGKPNDDI	_IDTSVIDAES(ph)DSTPNTAR_	P09959	S000004172	YLR182W	SWI6	SWItching deficient	Transcription cofactor; forms complexes with Swi4p and Mbp1p to regulate transcription at the G1/S transition; involved in meiotic gene expression; also binds Stb1p to regulate transcription at START; cell wall stress induces phosphorylation by Mpk1p, which regulates Swi6p localization; required for the unfolded protein response, independently of its known transcriptional coactivators
-0.146483	0.0816123	NaN	NaN	-0.256183	0.111699	NaN	NaN	NaN	NaN	1.01783	0.948475	S				0.869185	79.148	84	0.084283	0.118186	1.6489	-0.0324355	-0.0722422	0.98315	LNRLAQNDGLLKNVWSYSR____________	_NVWS(ph)YSR_	P0C0V8	S000001765	YKR057W	RPS21A	Ribosomal Protein of the Small subunit	Protein component of the small (40S) ribosomal subunit; homologous to mammalian ribosomal protein S21, no bacterial homolog; RPS21A has a paralog, RPS21B, that arose from the whole genome duplication
0.86671	0.663208	NaN	NaN	1.11829	1.04103	-2.19862	-0.317883	2.24534	2.35465	-2.94518	-0.312665	S				0.989385	217.7	404	1.07476	0.038235	0.0933668	0.764959	-0.0892942	0.335538	KTNNSKSKTARAHNVSTSNNSPSTDNDSISK	_AHNVS(ph)TSNNSPSTDNDSISK_	P0C2J0	S000007364	YPR158W-B	YPR158W-B		Retrotransposon TYA Gag and TYB Pol genes; transcribed/translated as one unit; polyprotein is processed to make a nucleocapsid-like protein (Gag), reverse transcriptase (RT), protease (PR), and integrase (IN); similar to retroviral genes
NaN	NaN	NaN	NaN	NaN	NaN	NaN	NaN	NaN	NaN	-0.390558	0.185605	S				0.764114	102.89	406	0	0	0.106555	NaN	NaN	-0.102476	NNSKSKTARAHNVSTSNNSPSTDNDSISKST	_AHNVSTS(ph)NNS(ph)PSTDNDSISK_	P0C2J0	S000007364	YPR158W-B	YPR158W-B		Retrotransposon TYA Gag and TYB Pol genes; transcribed/translated as one unit; polyprotein is processed to make a nucleocapsid-like protein (Gag), reverse transcriptase (RT), protease (PR), and integrase (IN); similar to retroviral genes
NaN	NaN	NaN	NaN	NaN	NaN	-0.448478	0.194807	NaN	NaN	-0.699552	0.193041	S				0.940401	200.2	411	0	0.118686	0.173013	NaN	-0.126836	-0.253255	KTARAHNVSTSNNSPSTDNDSISKSTTEPIQ	_AHNVSTSNNSPS(ph)TDNDSISK_	P0C2J0	S000007364	YPR158W-B	YPR158W-B		Retrotransposon TYA Gag and TYB Pol genes; transcribed/translated as one unit; polyprotein is processed to make a nucleocapsid-like protein (Gag), reverse transcriptase (RT), protease (PR), and integrase (IN); similar to retroviral genes
1.14333	1.26009	-1.16684	-0.265557	0.867422	0.97739	-0.920827	-0.127237	0.97629	1.0165	-1.05242	-0.0546401	S				0.999593	220.28	960	0.151473	0.163045	0.16558	0.242753	0.199187	0.221433	ELHPEQLRNVLSKAVSPTDSTPPSTHTEDSK;ELHPEQPRNVLSKAVSPTDSTPPSTHTEDSK;ELYPEQPRNVLSKAVSPTDSTPPSTHTEDSK	_AVS(ph)PTDS(ph)TPPSTHTEDSKR_	P0C2J0	S000007364	YPR158W-B	YPR158W-B		Retrotransposon TYA Gag and TYB Pol genes; transcribed/translated as one unit; polyprotein is processed to make a nucleocapsid-like protein (Gag), reverse transcriptase (RT), protease (PR), and integrase (IN); similar to retroviral genes
NaN	NaN	NaN	NaN	0.263275	0.400866	NaN	NaN	0.53057	0.46425	-0.7284	0.157657	S				0.834073	84.975	964	0	0.885891	0.131518	NaN	0.33207	0.106019	EQLRNVLSKAVSPTDSTPPSTHTEDSKRVSK;EQPRNVLSKAVSPTDSTPPSTHTEDSKRVSK	_AVS(ph)PTDS(ph)TPPSTHTEDSKR_	P0C2J0	S000007364	YPR158W-B	YPR158W-B		Retrotransposon TYA Gag and TYB Pol genes; transcribed/translated as one unit; polyprotein is processed to make a nucleocapsid-like protein (Gag), reverse transcriptase (RT), protease (PR), and integrase (IN); similar to retroviral genes
NaN	NaN	-1.521	-0.559736	1.0653	1.17536	-1.98295	-0.386259	NaN	NaN	NaN	NaN	S				0.941534	162.26	993	0.559859	0.0140603	0	-1.04037	-0.0321364	NaN	SEINLRAPREVDPNISESNILPSKKRSSTPQ;SKTNIRAPREVDPNISESNILPSKKRSSTPQ	_EVDPNIS(ph)ESNILPSK_	P0C2J0	S000007364	YPR158W-B	YPR158W-B		Retrotransposon TYA Gag and TYB Pol genes; transcribed/translated as one unit; polyprotein is processed to make a nucleocapsid-like protein (Gag), reverse transcriptase (RT), protease (PR), and integrase (IN); similar to retroviral genes
1.08549	1.17101	NaN	NaN	NaN	NaN	NaN	NaN	NaN	NaN	NaN	NaN	S				0.763644	57.826	1051	1.61769	0	0	1.12825	NaN	NaN	THESSHASKSKDFRHSDSYSENETNHTNVPI	_HS(ph)DS(ph)YSENETNHTNVPISSTGGTNNK_	P0C2J0	S000007364	YPR158W-B	YPR158W-B		Retrotransposon TYA Gag and TYB Pol genes; transcribed/translated as one unit; polyprotein is processed to make a nucleocapsid-like protein (Gag), reverse transcriptase (RT), protease (PR), and integrase (IN); similar to retroviral genes
0.939904	0.9855	NaN	NaN	1.16234	1.19402	-1.06323	-0.0291349	1.10836	1.20163	-2.24796	-0.299245	S				0.920077	92.231	1053	1.82179	0.221854	0.0241101	0.962702	0.316	-0.0593029	ESSHASKSKDFRHSDSYSENETNHTNVPISS	_HSDS(ph)YS(ph)ENETNHTNVPISSTGGTNNK_	P0C2J0	S000007364	YPR158W-B	YPR158W-B		Retrotransposon TYA Gag and TYB Pol genes; transcribed/translated as one unit; polyprotein is processed to make a nucleocapsid-like protein (Gag), reverse transcriptase (RT), protease (PR), and integrase (IN); similar to retroviral genes
2.15241	2.31641	NaN	NaN	1.16234	1.19402	-2.46208	-0.157303	NaN	NaN	-1.33628	-0.312317	S				0.953202	92.231	1055	1.63167	0.0251314	0.451202	2.23441	-0.0657545	-0.8243	SHASKSKDFRHSDSYSENETNHTNVPISSTG	_HSDS(ph)YS(ph)ENETNHTNVPISSTGGTNNK_	P0C2J0	S000007364	YPR158W-B	YPR158W-B		Retrotransposon TYA Gag and TYB Pol genes; transcribed/translated as one unit; polyprotein is processed to make a nucleocapsid-like protein (Gag), reverse transcriptase (RT), protease (PR), and integrase (IN); similar to retroviral genes
-0.774256	-0.168966	1.0211	0.0908183	-0.709694	-0.382194	NaN	NaN	NaN	NaN	NaN	NaN	S				0.96232	86.756	47	0.0375483	0.731629	0	0.0421744	-0.545944	NaN	PLDVSASKIQEYDKASTKANSQQTTTPASSA	_IQEYDKAS(ph)TK_	P0C2J0	S000007364	YPR158W-B	YPR158W-B		Retrotransposon TYA Gag and TYB Pol genes; transcribed/translated as one unit; polyprotein is processed to make a nucleocapsid-like protein (Gag), reverse transcriptase (RT), protease (PR), and integrase (IN); similar to retroviral genes
-0.150625	0.180403	-2.8267	-1.28948	NaN	NaN	-1.44021	-0.603692	NaN	NaN	NaN	NaN	S				0.862212	158.33	1005	0.63917	0.606756	0	-1.0216	-1.02195	NaN	PNISESNILPSKKRSSTPQISNIESTGSGGM	_RSS(ph)TPQISNIESTGSGGMHK_	P0C2J0	S000007364	YPR158W-B	YPR158W-B		Retrotransposon TYA Gag and TYB Pol genes; transcribed/translated as one unit; polyprotein is processed to make a nucleocapsid-like protein (Gag), reverse transcriptase (RT), protease (PR), and integrase (IN); similar to retroviral genes
NaN	NaN	NaN	NaN	-0.645006	-0.786348	NaN	NaN	-0.202605	-0.00244017	NaN	NaN	S				0.970153	124.86	13	0	1.203	0.307741	NaN	-0.715677	-0.102523	___MESQQLSNYPHISHGSACASVTSKEVHT	_(ac)MESQQLSNYPHIS(ph)HGSACASVTSK_	P0C2J0	S000007364	YPR158W-B	YPR158W-B		Retrotransposon TYA Gag and TYB Pol genes; transcribed/translated as one unit; polyprotein is processed to make a nucleocapsid-like protein (Gag), reverse transcriptase (RT), protease (PR), and integrase (IN); similar to retroviral genes
0.217355	0.431035	NaN	NaN	NaN	NaN	NaN	NaN	NaN	NaN	-0.725261	-0.0318186	S				0.984221	82.773	956	0.693221	0	0.325977	0.324195	NaN	-0.37854	QSDIELHPEQLRNVLSKAVSPTDSTPPSTHT;QSDIELHPEQPRNVLSKAVSPTDSTPPSTHT;QSDIELYPEQPRNVLSKAVSPTDSTPPSTHT	_NVLS(ph)KAVS(ph)PTDSTPPSTHTEDSKR_	P0C2J0	S000007364	YPR158W-B	YPR158W-B		Retrotransposon TYA Gag and TYB Pol genes; transcribed/translated as one unit; polyprotein is processed to make a nucleocapsid-like protein (Gag), reverse transcriptase (RT), protease (PR), and integrase (IN); similar to retroviral genes
1.16459	1.40125	-1.36866	-0.516923	0.982729	1.08393	-1.35834	-0.27608	NaN	NaN	NaN	NaN	S				0.869317	149.93	1095	0.0886698	0.063622	0	0.170065	0.108059	NaN	ISDQETEKRIIHRSPSIDASPPENNSSHNIV	_SPS(ph)IDASPPENNSSHNIVPIK_	P0C2J0	S000007364	YPR158W-B	YPR158W-B		Retrotransposon TYA Gag and TYB Pol genes; transcribed/translated as one unit; polyprotein is processed to make a nucleocapsid-like protein (Gag), reverse transcriptase (RT), protease (PR), and integrase (IN); similar to retroviral genes
1.26267	1.38703	-1.16169	0.0349139	1.27923	1.33079	-1.22311	0.0744258	1.23622	1.23291	-1.16118	0.270834	S				0.999887	151.04	1081	0.244504	0.230732	0.270916	0.380731	0.365333	0.394695	ISSTGGTNNKTVPQISDQETEKRIIHRSPSI	_TVPQIS(ph)DQETEKR_	P0C2J0	S000007364	YPR158W-B	YPR158W-B		Retrotransposon TYA Gag and TYB Pol genes; transcribed/translated as one unit; polyprotein is processed to make a nucleocapsid-like protein (Gag), reverse transcriptase (RT), protease (PR), and integrase (IN); similar to retroviral genes
0.915559	0.513086	NaN	NaN	1.3247	1.06336	0.0668202	0.290727	NaN	NaN	NaN	NaN	S				0.950351	122.44	36	0.75742	0.969891	0	0.714323	0.686402	NaN	VTSKEVHTNQDPLDVSASKTEECEKASTKAN	_EVHTNQDPLDVS(ph)ASKTEECEK_	P0C2I3	S000007401	YDR365W-B	YDR365W-B		Retrotransposon TYA Gag and TYB Pol genes; transcribed/translated as one unit; polyprotein is processed to make a nucleocapsid-like protein (Gag), reverse transcriptase (RT), protease (PR), and integrase (IN); similar to retroviral genes
-0.624821	-0.85807	NaN	NaN	NaN	NaN	1.11566	0.275489	-0.8631	-1.3821	0.403141	-0.231555	S				0.951438	115.39	47	1.00295	0.461071	0.564262	-0.741446	0.695575	-0.518403	PLDVSASKTEECEKASTKANSQQTTTPASSA	_EVHTNQDPLDVSASKTEECEKAS(ph)TK_	P0C2I3	S000007401	YDR365W-B	YDR365W-B		Retrotransposon TYA Gag and TYB Pol genes; transcribed/translated as one unit; polyprotein is processed to make a nucleocapsid-like protein (Gag), reverse transcriptase (RT), protease (PR), and integrase (IN); similar to retroviral genes
0.217603	0.251083	-0.667574	-0.734048	0.20989	1.16086	-0.168899	0.072771	NaN	NaN	0.389073	-0.0306892	S				0.988236	111.4	7	0.345058	0.450784	0.259549	-0.233234	0.318654	0.179192	_________MESQQLSQHSPISHGSACASVT	_(ac)M(ox)ESQQLS(ph)QHSPISHGSACASVTSK_	P0C2I3	S000007401	YDR365W-B	YDR365W-B		Retrotransposon TYA Gag and TYB Pol genes; transcribed/translated as one unit; polyprotein is processed to make a nucleocapsid-like protein (Gag), reverse transcriptase (RT), protease (PR), and integrase (IN); similar to retroviral genes
0.184979	0.194465	-0.190299	-0.0344974	0.0877344	0.0848807	0.0344263	0.0979032	0.00317045	-0.0459079	-0.537346	-0.0947765	S				0.977926	116.45	10	0.151732	1.89671	0.571283	0.0386619	0.0762362	-0.168715	______MESQQLSQHSPISHGSACASVTSKE	_(ac)MESQQLSQHS(ph)PISHGSACASVTSK_	P0C2I3	S000007401	YDR365W-B	YDR365W-B		Retrotransposon TYA Gag and TYB Pol genes; transcribed/translated as one unit; polyprotein is processed to make a nucleocapsid-like protein (Gag), reverse transcriptase (RT), protease (PR), and integrase (IN); similar to retroviral genes
0.0340749	-0.463808	-0.251931	0.238851	0.0332292	-0.176952	0.214977	0.0519076	-0.149073	-0.234839	NaN	NaN	S				0.965589	98.84	13	0.278765	0.138341	0.854108	-0.110703	0.0307905	-0.191956	___MESQQLSQHSPISHGSACASVTSKEVHT;___MESQQLSQHSPISHGSACASVTSKEVQT	_(ac)MESQQLS(ph)QHSPIS(ph)HGSACASVTSK_	P0C2I3	S000007401	YDR365W-B	YDR365W-B		Retrotransposon TYA Gag and TYB Pol genes; transcribed/translated as one unit; polyprotein is processed to make a nucleocapsid-like protein (Gag), reverse transcriptase (RT), protease (PR), and integrase (IN); similar to retroviral genes
0.0147838	-0.229163	NaN	NaN	0.0184917	-0.151779	NaN	NaN	NaN	NaN	NaN	NaN	S				0.833347	108.08	16	0.266792	0.238688	0	-0.107189	-0.0666435	NaN	MESQQLSQHSPISHGSACASVTSKEVHTNQD;MESQQLSQHSPISHGSACASVTSKEVQTTQD	_(ac)MESQQLSQHS(ph)PIS(ph)HGS(ph)ACASVTSK_	P0C2I3	S000007401	YDR365W-B	YDR365W-B		Retrotransposon TYA Gag and TYB Pol genes; transcribed/translated as one unit; polyprotein is processed to make a nucleocapsid-like protein (Gag), reverse transcriptase (RT), protease (PR), and integrase (IN); similar to retroviral genes
1.15225	1.30176	-1.5655	-0.255561	0.857026	0.833821	-0.939753	-0.121015	1.15231	1.27125	-1.30387	-0.135272	S				0.999132	201.61	960	0.0812906	0.13138	0.147343	0.158238	0.15752	0.246105	ELHPEQPRNVLSKAVSPTDSTPPSTHTEDSK	_AVS(ph)PTDSTPPSTHTEDSK_	P0C2J1	S000007362	YPR158C-D	YPR158C-D		Retrotransposon TYA Gag and TYB Pol genes; transcribed/translated as one unit; polyprotein is processed to make a nucleocapsid-like protein (Gag), reverse transcriptase (RT), protease (PR), and integrase (IN); similar to retroviral genes
0.236707	0.332278	-0.233888	-0.629753	0.42094	0.19131	-0.365245	0.0267634	0.0546401	0.275365	-0.243182	-0.0229004	S				0.973932	119.01	10	0.117625	0.150463	0.0502315	-0.073664	0.0684423	0.0159807	______MESQQLSNYSPISHGSACASVTSKE	_(ac)MESQQLSNYS(ph)PISHGSACASVTSK_	P0C2J1	S000007362	YPR158C-D	YPR158C-D		Retrotransposon TYA Gag and TYB Pol genes; transcribed/translated as one unit; polyprotein is processed to make a nucleocapsid-like protein (Gag), reverse transcriptase (RT), protease (PR), and integrase (IN); similar to retroviral genes
3.0635	3.54572	NaN	NaN	NaN	NaN	NaN	NaN	NaN	NaN	NaN	NaN	S				1	81.525	232	1.3338	0	0	3.30461	NaN	NaN	SERKAEKAEIRKRRASSLKA___________	_RAS(ph)S(ph)LKA_	P0CX37	S000006011	YPL090C	RPS6A	Ribosomal Protein of the Small subunit	Protein component of the small (40S) ribosomal subunit; homologous to mammalian ribosomal protein S6, no bacterial homolog; RPS6A has a paralog, RPS6B, that arose from the whole genome duplication
3.0635	3.54572	NaN	NaN	NaN	NaN	NaN	NaN	NaN	NaN	NaN	NaN	S				1	81.525	233	1.3338	0	0	3.30461	NaN	NaN	ERKAEKAEIRKRRASSLKA____________	_RAS(ph)S(ph)LKA_	P0CX37	S000006011	YPL090C	RPS6A	Ribosomal Protein of the Small subunit	Protein component of the small (40S) ribosomal subunit; homologous to mammalian ribosomal protein S6, no bacterial homolog; RPS6A has a paralog, RPS6B, that arose from the whole genome duplication
-0.72173	-0.216937	NaN	NaN	NaN	NaN	NaN	NaN	NaN	NaN	NaN	NaN	S				0.88446	130.1	6	0.502912	0	0	-0.469334	NaN	NaN	__________MSKITSSQVREHVKELLKYSN	_ITS(ph)SQVR_	P0CX43	S000006141	YPL220W	RPL1A	Ribosomal Protein of the Large subunit	Ribosomal 60S subunit protein L1A; N-terminally acetylated; homologous to mammalian ribosomal protein L10A and bacterial L1; RPL1A has a paralog, RPL1B, that arose from the whole genome duplication; rpl1a rpl1b double null mutation is lethal
-0.479472	0.499782	NaN	NaN	NaN	NaN	NaN	NaN	NaN	NaN	NaN	NaN	S				0.963139	130.1	7	0.00577163	0	0	0.010155	NaN	NaN	_________MSKITSSQVREHVKELLKYSNE	_ITSS(ph)QVR_	P0CX43	S000006141	YPL220W	RPL1A	Ribosomal Protein of the Large subunit	Ribosomal 60S subunit protein L1A; N-terminally acetylated; homologous to mammalian ribosomal protein L10A and bacterial L1; RPL1A has a paralog, RPL1B, that arose from the whole genome duplication; rpl1a rpl1b double null mutation is lethal
0.11929	0.49211	NaN	NaN	NaN	NaN	NaN	NaN	NaN	NaN	NaN	NaN	S				0.999977	80.231	21	0.457672	0	0	0.3057	NaN	NaN	TSKQHKRSGHRTAPKSDNVYLKLLVKLYTFL	_S(ph)DNVYLK_	P0CX49	S000005480	YOL120C	RPL18A	Ribosomal Protein of the Large subunit	Ribosomal 60S subunit protein L18A; intron of RPL18A pre-mRNA forms stem-loop structures that are a target for Rnt1p cleavage leading to degradation; homologous to mammalian ribosomal protein L18, no bacterial homolog; RPL18A has a paralog, RPL18B, that arose from the whole genome duplication
NaN	NaN	-0.0809305	1.39817	1.0333	0.227002	NaN	NaN	NaN	NaN	-0.0756011	1.70003	S				1	113.63	38	0.270181	0.440895	0.277126	0.65862	0.630151	0.812214	GASAALAPKIGPLGLSPKKVGEDIAKATKEF	_IGPLGLS(ph)PK_	P0CX53	S000000780	YEL054C	RPL12A	Ribosomal Protein of the Large subunit	Ribosomal 60S subunit protein L12A; rpl12a rpl12b double mutant exhibits slow growth and slow translation; homologous to mammalian ribosomal protein L12 and bacterial L11; RPL12A has a paralog, RPL12B, that arose from the whole genome duplication
NaN	NaN	NaN	NaN	NaN	NaN	NaN	NaN	NaN	NaN	NaN	NaN	S				0.999999	88.574	3	0	0	0	NaN	NaN	NaN	_____________MRSIENDRSNYQLTQKNK	_MRS(ph)IENDRS(ph)NYQLTQK_	P0CY13	S000000692	YCR096C	HMRA2	Hidden Mat Right A	Silenced copy of a2 at HMR; similarity to Alpha2p; required along with a1p for inhibiting expression of the HO endonuclease in a/alpha HO/HO diploid cells with an active mating-type interconversion system
0.674732	0.592158	NaN	NaN	0.406646	0.244278	-0.484808	0.1708	NaN	NaN	NaN	NaN	S				0.997696	131.56	2	1.38263	0.157176	0	0.633445	0.0842288	NaN	______________MSEGITDIEESQIQTNY	_(ac)S(ph)EGITDIEESQIQTNYDK_	P10081	S000003674	YJL138C	TIF2	Translation Initiation Factor	Translation initiation factor eIF4A; DEA(D/H)-box RNA helicase that couples ATPase activity to RNA binding and unwinding; forms a dumbbell structure of two compact domains connected by a linker; interacts with eIF4G; protein abundance increases in response to DNA replication stress; TIF2 has a paralog, TIF1, that arose from the whole genome duplication
0.138028	-0.0608487	0.116004	-0.103128	-0.246276	-0.287519	0.825133	0.17612	-0.563156	-0.738818	-0.00129789	-0.294782	S				0.958959	107.98	495	0.132507	0.166436	1.04924	0.0225137	0.116865	-0.399514	NGILNVSAVEKGTGKSNKITITNDKGRLSKE	_GTGKS(ph)NKITITNDK_	P10591	S000000004	YAL005C	SSA1	Stress-Seventy subfamily A	ATPase involved in protein folding and NLS-directed nuclear transport; member of HSP70 family; forms chaperone complex with Ydj1p; localized to nucleus, cytoplasm, and cell wall; 98% identical with paralog Ssa2p, but subtle differences between the two proteins provide functional specificity with respect to propagation of yeast [URE3] prions and vacuolar-mediated degradations of gluconeogenesis en…
NaN	NaN	NaN	NaN	NaN	NaN	NaN	NaN	-0.284739	-0.543993	0.898431	0.542332	S				0.87976	53.209	486	0	0	0.165606	NaN	NaN	0.153008	IEVTFDVDSNGILNVSAVEKGTGKSNKITIT	_GVPQIEVTFDVDSNGILNVS(ph)AVEKGTGKSNK_	P10591	S000000004	YAL005C	SSA1	Stress-Seventy subfamily A	ATPase involved in protein folding and NLS-directed nuclear transport; member of HSP70 family; forms chaperone complex with Ydj1p; localized to nucleus, cytoplasm, and cell wall; 98% identical with paralog Ssa2p, but subtle differences between the two proteins provide functional specificity with respect to propagation of yeast [URE3] prions and vacuolar-mediated degradations of gluconeogenesis en…
0.151079	-0.121439	0.411138	NaN	NaN	NaN	NaN	NaN	NaN	NaN	NaN	NaN	S				0.994685	87.676	551	0.356418	0	0	0.146926	NaN	NaN	KNQLESIAYSLKNTISEAGDKLEQADKDAVT	_NTIS(ph)EAGDKLEQADKDAVTK_	P10592	S000003947	YLL024C	SSA2	Stress-Seventy subfamily A	ATP-binding protein; involved in protein folding and vacuolar import of proteins; member of heat shock protein 70 (HSP70) family; associated with the chaperonin-containing T-complex; present in the cytoplasm, vacuolar membrane and cell wall; 98% identical with paralog Ssa1p, but subtle differences between the two proteins provide functional specificity with respect to propagation of yeast [URE3] …
NaN	NaN	NaN	NaN	NaN	NaN	0.438953	-0.0361869	NaN	NaN	NaN	NaN	S				0.762834	97.797	282	0	0.257775	0	NaN	0.201383	NaN	VASSKVGYTLPSHIISTSDVTRIINSSEIQS	_VGYTLPSHIIS(ph)TSDVTR_	P10664	S000000235	YBR031W	RPL4A	Ribosomal Protein of the Large subunit	Ribosomal 60S subunit protein L4A; N-terminally acetylated; homologous to mammalian ribosomal protein L4 and bacterial L4; RPL4A has a paralog, RPL4B, that arose from the whole genome duplication
-0.793107	-1.48584	0.619825	0.219102	NaN	NaN	NaN	NaN	NaN	NaN	NaN	NaN	S				0.959041	166.05	20	0.295253	0	0	-0.360006	NaN	NaN	ASSEKNGSTPDTQTASAGSDNVGKAKVPPKQ	_NGSTPDTQTAS(ph)AGS(ph)DNVGK_	P10823	S000000822	YER020W	GPA2	G Protein Alpha subunit	Nucleotide binding alpha subunit of the heterotrimeric G protein; interacts with the receptor Gpr1p, has signaling role in response to nutrients; required for the recruitment of Ras-GTP at the plasma membrane and in the nucleus
-1.05541	-0.823141	0.619825	0.219102	-0.606716	-0.942889	0.833516	-0.311852	NaN	NaN	1.61476	-0.0461418	S				0.999993	242.09	23	0.247704	0.257378	0.285514	-0.259906	-0.256985	0.784307	EKNGSTPDTQTASAGSDNVGKAKVPPKQEPQ	_NGSTPDTQTASAGS(ph)DNVGK_	P10823	S000000822	YER020W	GPA2	G Protein Alpha subunit	Nucleotide binding alpha subunit of the heterotrimeric G protein; interacts with the receptor Gpr1p, has signaling role in response to nutrients; required for the recruitment of Ras-GTP at the plasma membrane and in the nucleus
NaN	NaN	-0.191942	-0.244278	NaN	NaN	NaN	NaN	NaN	NaN	NaN	NaN	S				0.752812	111.66	113	1.11909	0	0	-0.21811	NaN	NaN	ALRDRSSNVAAQPSLSDASSGSNDKELKVLL	_SSNVAAQPSLS(ph)DASSGSNDKELK_	P10823	S000000822	YER020W	GPA2	G Protein Alpha subunit	Nucleotide binding alpha subunit of the heterotrimeric G protein; interacts with the receptor Gpr1p, has signaling role in response to nutrients; required for the recruitment of Ras-GTP at the plasma membrane and in the nucleus
0.0467006	0.289126	-0.0751904	0.0260288	-0.00297501	0.467905	0.241936	0.430742	-0.025133	0.332049	0.0807743	0.351608	S				0.876289	114.46	332	0.374851	1.10907	0.848179	0.0716663	0.284402	0.184825	NGTIIYPDNVAKKGESTPPHPPENLSSSFYE	_KGES(ph)TPPHPPENLSSSFYEK_	P10869	S000000854	YER052C	HOM3	HOMoserine requiring	Aspartate kinase (L-aspartate 4-P-transferase); cytoplasmic enzyme that catalyzes the first step in the common pathway for methionine and threonine biosynthesis; expression regulated by Gcn4p and the general control of amino acid synthesis
NaN	NaN	NaN	NaN	NaN	NaN	2.23929	-0.0357646	NaN	NaN	NaN	NaN	S				0.904153	63.701	342	0	0.292288	0	NaN	1.10176	NaN	AKKGESTPPHPPENLSSSFYEKRKRGATAIT	_KGEST(ph)PPHPPENLS(ph)SSFYEKR_	P10869	S000000854	YER052C	HOM3	HOMoserine requiring	Aspartate kinase (L-aspartate 4-P-transferase); cytoplasmic enzyme that catalyzes the first step in the common pathway for methionine and threonine biosynthesis; expression regulated by Gcn4p and the general control of amino acid synthesis
NaN	NaN	NaN	NaN	-0.0763412	-0.358565	0.209812	-0.148088	NaN	NaN	NaN	NaN	S				0.958114	121.94	545	0	0.314234	0	NaN	-0.0932956	NaN	IRPYKQRYLLKNRANSSTSSENPSLTPFDIE	_ANS(ph)STSSENPSLTPFDIESNNDRK_	P10961	S000003041	YGL073W	HSF1	Heat Shock transcription Factor	Trimeric heat shock transcription factor; activates multiple genes in response to highly diverse stresses, including hyperthermia; recognizes variable heat shock elements (HSEs) consisting of inverted NGAAN repeats; monitors translational status of cell at the ribosome through an RQC (Ribosomal Quality Control)-mediated translation-stress signal; involved in diauxic shift; posttranslationally reg…
-0.461045	-0.658789	NaN	NaN	NaN	NaN	NaN	NaN	NaN	NaN	NaN	NaN	S				0.995421	150.69	471	0.953625	0	0	-0.559917	NaN	NaN	RNSFTNATTNARNNMSPNNDDNSIDTASTNT	_NNMS(ph)PNNDDNSIDTASTNTTNR_	P10961	S000003041	YGL073W	HSF1	Heat Shock transcription Factor	Trimeric heat shock transcription factor; activates multiple genes in response to highly diverse stresses, including hyperthermia; recognizes variable heat shock elements (HSEs) consisting of inverted NGAAN repeats; monitors translational status of cell at the ribosome through an RQC (Ribosomal Quality Control)-mediated translation-stress signal; involved in diauxic shift; posttranslationally reg…
0.095722	0.160404	-0.399663	-0.242084	NaN	NaN	NaN	NaN	NaN	NaN	NaN	NaN	S				1	68.657	241	0.280366	0	0	-0.0964054	NaN	NaN	GEYVDVDDLEKWLADSDREASSASESESDSE	_WLADS(ph)DR_	P10962	S000000023	YAL025C	MAK16	MAintenance of Killer	Essential nuclear protein; constituent of 66S pre-ribosomal particles; required for maturation of 25S and 5.8S rRNAs; required for maintenance of M1 satellite double-stranded RNA of the L-A virus
NaN	NaN	NaN	NaN	NaN	NaN	NaN	NaN	NaN	NaN	NaN	NaN	S				0.796361	124.16	1738	0	0	0	NaN	NaN	NaN	SQHSDDDSNDRRENDSNISETVERAHQEESS	_ENDS(ph)NISETVER_	P11075	S000002577	YDR170C	SEC7	SECretory	Guanine nucleotide exchange factor (GEF) for ADP ribosylation factors; involved in proliferation of the Golgi, intra-Golgi transport and ER-to-Golgi transport; found in the cytoplasm and on Golgi-associated coated vesicles
NaN	NaN	NaN	NaN	0.639325	0.9282	NaN	NaN	NaN	NaN	NaN	NaN	S				0.937141	114.39	215	0	0.93547	0	NaN	0.783762	NaN	STAPRSTHTRNISLSSNGSNTNSTIILVKTT	_NISLSS(ph)NGSNTNSTIILVK_	P11075	S000002577	YDR170C	SEC7	SECretory	Guanine nucleotide exchange factor (GEF) for ADP ribosylation factors; involved in proliferation of the Golgi, intra-Golgi transport and ER-to-Golgi transport; found in the cytoplasm and on Golgi-associated coated vesicles
0.379288	0.333538	0.0853743	0.342598	0.0717627	-0.108892	NaN	NaN	0.357833	0.399116	2.38624	1.3973	S				0.975208	103.44	777	1.61813	0.0600044	1.00198	0.2852	-0.0185647	1.13512	ANKVLLNTTSSARQESRSSLSNDVRSSIMTS	_QES(ph)RSS(ph)LSNDVR_	P11075	S000002577	YDR170C	SEC7	SECretory	Guanine nucleotide exchange factor (GEF) for ADP ribosylation factors; involved in proliferation of the Golgi, intra-Golgi transport and ER-to-Golgi transport; found in the cytoplasm and on Golgi-associated coated vesicles
-0.465978	-0.409182	1.98524	1.16757	NaN	NaN	1.53872	1.33657	-0.342012	-0.201891	2.38624	1.3973	S				0.919753	99.752	779	0.380871	1.34984	0.514995	0.569414	1.43765	0.809909	KVLLNTTSSARQESRSSLSNDVRSSIMTSND	_QESRS(ph)S(ph)LSNDVR_	P11075	S000002577	YDR170C	SEC7	SECretory	Guanine nucleotide exchange factor (GEF) for ADP ribosylation factors; involved in proliferation of the Golgi, intra-Golgi transport and ER-to-Golgi transport; found in the cytoplasm and on Golgi-associated coated vesicles
-0.465978	-0.409182	2.23162	1.25047	-0.0170959	-0.0885308	0.686801	0.537759	-0.476197	-0.47295	0.0935096	0.334553	S				0.978394	117.25	780	0.401977	0.607688	0.244204	0.651733	0.279733	-0.130271	VLLNTTSSARQESRSSLSNDVRSSIMTSNDD	_SS(ph)LSNDVR_	P11075	S000002577	YDR170C	SEC7	SECretory	Guanine nucleotide exchange factor (GEF) for ADP ribosylation factors; involved in proliferation of the Golgi, intra-Golgi transport and ER-to-Golgi transport; found in the cytoplasm and on Golgi-associated coated vesicles
-0.242891	-0.968944	NaN	NaN	-0.125353	0.565792	NaN	NaN	NaN	NaN	NaN	NaN	S				0.969993	90.453	437	0.463901	0.194633	0	-0.605918	0.22022	NaN	VYDKIDLKQSTSSAVSLSTKNHQQQSAIELS	_QSTSS(ph)AVS(ph)LSTK_	P11075	S000002577	YDR170C	SEC7	SECretory	Guanine nucleotide exchange factor (GEF) for ADP ribosylation factors; involved in proliferation of the Golgi, intra-Golgi transport and ER-to-Golgi transport; found in the cytoplasm and on Golgi-associated coated vesicles
0.179129	-0.0685287	NaN	NaN	NaN	NaN	NaN	NaN	NaN	NaN	NaN	NaN	S				0.844915	116.45	807	0.135125	0	0	0.0553	NaN	NaN	SNDDFKPTYEDEESRSLSSQNIDADDPTQFE	_S(ph)LSS(ph)QNIDADDPTQFENLK_	P11075	S000002577	YDR170C	SEC7	SECretory	Guanine nucleotide exchange factor (GEF) for ADP ribosylation factors; involved in proliferation of the Golgi, intra-Golgi transport and ER-to-Golgi transport; found in the cytoplasm and on Golgi-associated coated vesicles
0.179129	-0.0685287	NaN	NaN	NaN	NaN	NaN	NaN	NaN	NaN	NaN	NaN	S				0.972302	90.323	810	0.135125	0	0	0.0553	NaN	NaN	DFKPTYEDEESRSLSSQNIDADDPTQFENLK	_S(ph)LSS(ph)QNIDADDPTQFENLK_	P11075	S000002577	YDR170C	SEC7	SECretory	Guanine nucleotide exchange factor (GEF) for ADP ribosylation factors; involved in proliferation of the Golgi, intra-Golgi transport and ER-to-Golgi transport; found in the cytoplasm and on Golgi-associated coated vesicles
0.0576928	0.180912	0.520997	-0.037312	NaN	NaN	0.738553	0.373888	-0.161234	-0.253034	0.546667	0.254444	S				0.99622	112.67	1220	0.62844	0.695378	0.194205	0.180572	0.556221	0.0967109	TVPDVAQARVANPRVSYESSRSNNTSFFDVW	_VANPRVS(ph)YESSR_	P11075	S000002577	YDR170C	SEC7	SECretory	Guanine nucleotide exchange factor (GEF) for ADP ribosylation factors; involved in proliferation of the Golgi, intra-Golgi transport and ER-to-Golgi transport; found in the cytoplasm and on Golgi-associated coated vesicles
0.356257	0.719665	NaN	NaN	NaN	NaN	NaN	NaN	NaN	NaN	NaN	NaN	S				0.809322	136.7	771	0.683257	0	0	0.537961	NaN	NaN	NPNTHTANKVLLNTTSSARQESRSSLSNDVR	_VLLNTTS(ph)SAR_	P11075	S000002577	YDR170C	SEC7	SECretory	Guanine nucleotide exchange factor (GEF) for ADP ribosylation factors; involved in proliferation of the Golgi, intra-Golgi transport and ER-to-Golgi transport; found in the cytoplasm and on Golgi-associated coated vesicles
NaN	NaN	1.02444	0.889717	NaN	NaN	NaN	NaN	0.2529	0.480369	1.58372	1.39866	S				0.93189	120.53	772	1.34936	0	1.17347	0.95708	NaN	0.928914	PNTHTANKVLLNTTSSARQESRSSLSNDVRS	_VLLNTTSS(ph)AR_	P11075	S000002577	YDR170C	SEC7	SECretory	Guanine nucleotide exchange factor (GEF) for ADP ribosylation factors; involved in proliferation of the Golgi, intra-Golgi transport and ER-to-Golgi transport; found in the cytoplasm and on Golgi-associated coated vesicles
1.23511	1.23762	-1.50863	-0.253384	0.978635	1.19383	-1.64584	-0.598556	1.12486	1.36323	-0.847756	-0.309991	S				0.858134	124.08	100	0.0936611	0.00860257	0.235542	0.177681	-0.0179815	0.332584	KQHQELLKSNGANRDSSDLAPTLRSSSISTA	_SNGANRDS(ph)SDLAPTLR_	P11433	S000000039	YAL041W	CDC24	Cell Division Cycle	Guanine nucleotide exchange factor for Cdc42p; also known as a GEF or GDP-release factor; required for polarity establishment and maintenance, and mutants have morphological defects in bud formation and shmooing; relocalizes from nucleus to cytoplasm upon DNA replication stress
NaN	NaN	NaN	NaN	NaN	NaN	0.351553	2.45862	NaN	NaN	NaN	NaN	S				0.928094	67.997	739	0	0.387657	0	NaN	1.40509	NaN	HMKRVSDVLPKRRTTSSSFESEIKSISENFK	_TTS(ph)SSFESEIK_	P11433	S000000039	YAL041W	CDC24	Cell Division Cycle	Guanine nucleotide exchange factor for Cdc42p; also known as a GEF or GDP-release factor; required for polarity establishment and maintenance, and mutants have morphological defects in bud formation and shmooing; relocalizes from nucleus to cytoplasm upon DNA replication stress
NaN	NaN	NaN	NaN	-0.117521	-1.24277	0.323805	-0.181421	NaN	NaN	NaN	NaN	S				1	136.14	591	0	0.369455	0	NaN	-0.304477	NaN	AALSDALAALQIEDPSADELRKAEVGLKRVV	_IEAALSDALAALQIEDPS(ph)ADELR_	P11484	S000002388	YDL229W	SSB1	Stress-Seventy subfamily B	Cytoplasmic ATPase that is a ribosome-associated molecular chaperone; functions with J-protein partner Zuo1p; may be involved in folding of newly-made polypeptide chains; member of the HSP70 family; interacts with phosphatase subunit Reg1p; SSB1 has a paralog, SSB2, that arose from the whole genome duplication
0.00719549	0.143132	1.80254	1.15853	NaN	NaN	NaN	NaN	NaN	NaN	0.772924	-0.299245	S				0.958521	166.49	515	0.779101	0	0.133618	0.777848	NaN	0.23684	GKSSNITISNAVGRLSSEEIEKMVNQAEEFK	_SSNITISNAVGRLS(ph)SEEIEK_	P11484	S000002388	YDL229W	SSB1	Stress-Seventy subfamily B	Cytoplasmic ATPase that is a ribosome-associated molecular chaperone; functions with J-protein partner Zuo1p; may be involved in folding of newly-made polypeptide chains; member of the HSP70 family; interacts with phosphatase subunit Reg1p; SSB1 has a paralog, SSB2, that arose from the whole genome duplication
-0.138807	-0.305289	0.500544	0.214675	-0.296722	-0.63254	1.19505	0.532074	-0.355719	-0.487945	1.99608	1.32305	S				0.999743	174.87	516	0.135384	0.179353	0.409252	0.067781	0.199467	0.618866	KSSNITISNAVGRLSSEEIEKMVNQAEEFKA	_LSS(ph)EEIEK_	P11484	S000002388	YDL229W	SSB1	Stress-Seventy subfamily B	Cytoplasmic ATPase that is a ribosome-associated molecular chaperone; functions with J-protein partner Zuo1p; may be involved in folding of newly-made polypeptide chains; member of the HSP70 family; interacts with phosphatase subunit Reg1p; SSB1 has a paralog, SSB2, that arose from the whole genome duplication
NaN	NaN	NaN	NaN	NaN	NaN	NaN	NaN	NaN	NaN	NaN	NaN	S				0.995539	166.91	123	0	0	0	NaN	NaN	NaN	IGSSRTRSSDSLVTDSAAGATAFACALKSYN	_SSDSLVTDS(ph)AAGATAFACALK_	P11491	S000002889	YDR481C	PHO8	PHOsphate metabolism	Repressible vacuolar alkaline phosphatase; regulated by levels of Pi and by Pho4p, Pho9p, Pho80p, Pho81p and Pho85p; dephosphorylates phosphotyrosyl peptides; contributes to NAD+ metabolism by producing nicotinamide riboside from NMN
0.765704	1.10071	-0.1333	0.20073	NaN	NaN	NaN	NaN	-0.115973	0.236829	NaN	NaN	S				0.990734	180.45	117	0.746404	0	0.102431	0.483461	NaN	0.0604284	IVRLTNQFSPMDDPKSPTPMRSFRITSRHSG	_LTNQFSPMDDPKS(ph)PTPMR_	P11709	S000000534	YCL029C	BIK1	BIlateral Karyogamy defect	Microtubule-associated protein; component of the interface between microtubules and kinetochore, involved in sister chromatid separation; essential in polyploid cells but not in haploid or diploid cells; ortholog of mammalian CLIP-170
NaN	NaN	NaN	NaN	NaN	NaN	0.113239	0.573918	NaN	NaN	NaN	NaN	S				0.999999	78.079	360	0	0.424833	0	NaN	0.343578	NaN	SKFDDLEVDDFEEVDSEDEEGEDEEDEDEDE	_FDDLEVDDFEEVDS(ph)EDEEGEDEEDEDEDEKLEEIETER_	P11745	S000004848	YMR235C	RNA1	RaN GTPase Activating protein	GTPase activating protein (GAP) for Gsp1p; involved in nuclear transport
-0.597518	-0.805207	NaN	NaN	0.164786	-0.0311793	-0.00733906	-0.0346383	0.269153	0.220701	-0.070252	0.149185	S				1	237.89	2	1.02882	0.177978	0.812004	-0.701362	0.0229074	0.142197	______________MSDIEEGTPTNNGQQKE	_(ac)S(ph)DIEEGT(ph)PTNNGQQKER_	P11746	S000004646	YMR043W	MCM1	MiniChromosome Maintenance	Transcription factor; involved in cell-type-specific transcription and pheromone response; plays a central role in the formation of both repressor and activator complexes; relocalizes to the cytosol in response to hypoxia
0.220825	0.018919	-0.641361	-0.430178	NaN	NaN	0.522136	0.778333	0.280006	0.170181	-0.495388	-0.27011	S				0.999998	183.7	726	0.429851	0.907172	0.157781	-0.207949	0.650235	-0.0788277	SYMNKHQPMMTATPLSPAMQAKFAGFTFVDE	_HQPMMTAT(ph)PLS(ph)PAMQAK_	P11792	S000001248	YHR205W	SCH9		AGC family protein kinase; functional ortholog of mammalian S6 kinase; phosphorylated by Tor1p and required for TORC1-mediated regulation of ribosome biogenesis, translation initiation, and entry into G0 phase; involved in transactivation of osmostress-responsive genes; regulates G1 progression, cAPK activity and nitrogen activation of the FGM pathway; integrates nutrient signals and stress signa…
NaN	NaN	NaN	NaN	-0.234669	-0.482029	NaN	NaN	NaN	NaN	NaN	NaN	S				0.850836	167.34	288	0	0.674541	0	NaN	-0.358349	NaN	SIKEHLKKKPLYTHRSSSQLDQLNSCSSVTD	_S(ph)SSQLDQLNSCSSVTDPSKR_	P11792	S000001248	YHR205W	SCH9		AGC family protein kinase; functional ortholog of mammalian S6 kinase; phosphorylated by Tor1p and required for TORC1-mediated regulation of ribosome biogenesis, translation initiation, and entry into G0 phase; involved in transactivation of osmostress-responsive genes; regulates G1 progression, cAPK activity and nitrogen activation of the FGM pathway; integrates nutrient signals and stress signa…
-0.00676763	0.487898	0.78991	0.251504	-0.0751096	0.14104	0.450774	0.0218776	-0.160024	0.229834	0.904251	0.581713	S				1	133.15	587	0.955785	0.489955	0.725816	0.380636	0.134646	0.388943	LGEPPEVSLKPSKNLSNENCSFKKQGFKHQL	_NLS(ph)NENCSFK_	P11972	S000004444	YLR452C	SST2	SuperSensiTive	GTPase-activating protein for Gpa1p; regulates desensitization to alpha factor pheromone; also required to prevent receptor-independent signaling of the mating pathway; member of the RGS (regulator of G-protein signaling) family
0.187641	0.405557	NaN	NaN	0.535157	0.516721	NaN	NaN	0.737341	0.39835	0.575787	0.503691	S				0.821835	133.48	1133	0.649511	1.95246	2.35426	0.296599	0.525939	0.553792	LQITKKPLMVKNVKPSSPPDVKSLVQLSTME	_NVKPS(ph)SPPDVK_	P11978	S000002635	YDR227W	SIR4	Silent Information Regulator	SIR protein involved in assembly of silent chromatin domains; silent information regulator (SIR) along with SIR2 and SIR3; involved in assembly of silent chromatin domains at telomeres and the silent mating-type loci; potentially phosphorylated by Cdc28p; some alleles of SIR4 prolong lifespan
NaN	NaN	NaN	NaN	-0.120137	0.301939	-0.619836	-0.823097	0.737341	0.39835	NaN	NaN	S				0.838626	114.64	1134	0	0.520638	0.733618	NaN	-0.315283	0.567845	QITKKPLMVKNVKPSSPPDVKSLVQLSTMET	_NVKPSS(ph)PPDVK_	P11978	S000002635	YDR227W	SIR4	Silent Information Regulator	SIR protein involved in assembly of silent chromatin domains; silent information regulator (SIR) along with SIR2 and SIR3; involved in assembly of silent chromatin domains at telomeres and the silent mating-type loci; potentially phosphorylated by Cdc28p; some alleles of SIR4 prolong lifespan
NaN	NaN	NaN	NaN	-0.889824	-1.08375	0.521639	0.459596	NaN	NaN	NaN	NaN	S				1	178.06	948	0	0.219517	0	NaN	-0.248085	NaN	LPFNGRSAPSPVRNNSLPEFAQLPSFRSLSV	_NNS(ph)LPEFAQLPSFR_	P12383	S000002981	YGL013C	PDR1	Pleiotropic Drug Resistance	Transcription factor that regulates the pleiotropic drug response; zinc cluster protein that is a master regulator involved in recruiting other zinc cluster proteins to pleiotropic drug response elements (PDREs) to fine tune the regulation of multidrug resistance genes; relocalizes to the cytosol in response to hypoxia; PDR1 has a paralog, PDR3, that arose from the whole genome duplication
NaN	NaN	NaN	NaN	0.444879	0.526069	-0.619742	-0.00115371	NaN	NaN	NaN	NaN	S				0.88784	109.5	942	0	0.11864	0	NaN	0.0875131	NaN	GIESPQLPFNGRSAPSPVRNNSLPEFAQLPS	_SAPS(ph)PVRNNS(ph)LPEFAQLPSFR_	P12383	S000002981	YGL013C	PDR1	Pleiotropic Drug Resistance	Transcription factor that regulates the pleiotropic drug response; zinc cluster protein that is a master regulator involved in recruiting other zinc cluster proteins to pleiotropic drug response elements (PDREs) to fine tune the regulation of multidrug resistance genes; relocalizes to the cytosol in response to hypoxia; PDR1 has a paralog, PDR3, that arose from the whole genome duplication
0.515813	0.664483	NaN	NaN	NaN	NaN	NaN	NaN	NaN	NaN	NaN	NaN	S				0.999641	68.569	930	1.09817	0	0	0.590148	NaN	NaN	PSLKTGTSCLLNGIESPQLPFNGRSAPSPVR	_TGTSCLLNGIES(ph)PQLPFNGR_	P12383	S000002981	YGL013C	PDR1	Pleiotropic Drug Resistance	Transcription factor that regulates the pleiotropic drug response; zinc cluster protein that is a master regulator involved in recruiting other zinc cluster proteins to pleiotropic drug response elements (PDREs) to fine tune the regulation of multidrug resistance genes; relocalizes to the cytosol in response to hypoxia; PDR1 has a paralog, PDR3, that arose from the whole genome duplication
-0.187724	-0.612461	NaN	NaN	NaN	NaN	-0.196481	-0.0629506	NaN	NaN	NaN	NaN	S				0.7687	124.31	583	0.507716	0.519114	0	-0.400092	-0.129716	NaN	SLSSAQSSSSGPSSSSEEDDSRDIESLDKKI	_SLSSAQSS(ph)SSGPS(ph)SSS(ph)EEDDSRDIESLDKK_	P12683	S000004540	YML075C	HMG1	3-Hydroxy-3-MethylGlutaryl-coenzyme a reductase	HMG-CoA reductase; catalyzes the conversion of HMG-CoA to mevalonate, which is a rate-limiting step in sterol biosynthesis; one of two isozymes; localizes to the nuclear envelope; overproduction induces the formation of karmellae; forms foci at the nuclear periphery upon DNA replication stress; HMG1 has a paralog, HMG2, that arose from the whole genome duplication
0.0402613	0.605399	NaN	NaN	-0.538974	-1.49793	0.336792	0.0155783	-0.0751248	-0.340879	NaN	NaN	S				0.795606	104.38	51	0.339396	0.429794	0.441405	0.32283	-0.421135	-0.208002	NQATAGEHDASITRSSLDRKGTINPSNSSVV	_EEQQNNQATAGEHDASITRSS(ph)LDRK_	P12688	S000001609	YKL126W	YPK1	Yeast Protein Kinase	Serine/threonine protein kinase; phosphorylates and downregulates flippase activator Fpk1p; inactivates Orm1p and Orm2p (inhibitors of serine:palmitoyl-coenzyme A transferase) by phosphorylation in response to compromised sphingolipid synthesis; mutations affect receptor-mediated endocytosis and sphingolipid-mediated and cell integrity signaling pathways; homolog of mammalian kinase SGK; YPK1 has…
NaN	NaN	-1.10762	-1.30923	NaN	NaN	NaN	NaN	NaN	NaN	NaN	NaN	S				0.829432	91.883	651	1.27586	0	0	-1.20843	NaN	NaN	FTREKPIDSVVDEYLSESVQKQFGGWTYVGN	_EKPIDSVVDEYLS(ph)ESVQK_	P12688	S000001609	YKL126W	YPK1	Yeast Protein Kinase	Serine/threonine protein kinase; phosphorylates and downregulates flippase activator Fpk1p; inactivates Orm1p and Orm2p (inhibitors of serine:palmitoyl-coenzyme A transferase) by phosphorylation in response to compromised sphingolipid synthesis; mutations affect receptor-mediated endocytosis and sphingolipid-mediated and cell integrity signaling pathways; homolog of mammalian kinase SGK; YPK1 has…
-1.06302	-1.50869	NaN	NaN	NaN	NaN	NaN	NaN	-1.53621	-1.8099	NaN	NaN	S				0.971944	86.182	653	0.961617	0	1.28436	-1.28585	NaN	-1.67306	REKPIDSVVDEYLSESVQKQFGGWTYVGNEQ	_EKPIDS(ph)VVDEYLSES(ph)VQK_	P12688	S000001609	YKL126W	YPK1	Yeast Protein Kinase	Serine/threonine protein kinase; phosphorylates and downregulates flippase activator Fpk1p; inactivates Orm1p and Orm2p (inhibitors of serine:palmitoyl-coenzyme A transferase) by phosphorylation in response to compromised sphingolipid synthesis; mutations affect receptor-mediated endocytosis and sphingolipid-mediated and cell integrity signaling pathways; homolog of mammalian kinase SGK; YPK1 has…
-1.30369	-1.91735	2.04044	0.524417	-1.21116	-1.79226	NaN	NaN	NaN	NaN	2.20503	0.374673	S				0.981909	58.123	8	0.0620315	0.914824	0.405773	-0.164046	-1.50171	1.28985	________MSESEAKSRSATPPSKAKQATPT	_(ac)SESEAKS(ph)RS(ph)AT(ph)PPSK_	P12754	S000003315	YGR083C	GCD2	General Control Derepressed	Delta subunit of the translation initiation factor eIF2B; the guanine-nucleotide exchange factor for eIF2; activity subsequently regulated by phosphorylated eIF2; first identified as a negative regulator of GCN4 expression
-1.30369	-1.91735	2.04044	0.524417	-1.21116	-1.79226	NaN	NaN	-1.41346	-1.91964	NaN	NaN	S				0.982425	58.123	10	0.0620315	0.914824	1.01797	-0.164046	-1.50171	-1.66655	______MSESEAKSRSATPPSKAKQATPTTT	_(ac)SESEAKS(ph)RS(ph)AT(ph)PPSK_	P12754	S000003315	YGR083C	GCD2	General Control Derepressed	Delta subunit of the translation initiation factor eIF2B; the guanine-nucleotide exchange factor for eIF2; activity subsequently regulated by phosphorylated eIF2; first identified as a negative regulator of GCN4 expression
0.142087	0.0691523	0.176691	0.279004	0.0395595	-0.097008	0.0805455	0.096792	NaN	NaN	0.104558	0.0516534	S				1	75.112	154	1.50137	0.263863	0.682173	0.166733	0.0299723	0.0781056	ADKPILGFNAFAALESEDEDDEA________	_DIVADKPILGFNAFAALES(ph)EDEDDEA_	P12962	S000005802	YOR276W	CAF20	Cap Associated Factor	Phosphoprotein of the mRNA cap-binding complex; involved in translational control; repressor of cap-dependent translation initiation; competes with eIF4G for binding to eIF4E
-2.03085	-2.01695	0.584025	0.245232	-0.379695	-0.632428	0.492484	0.10883	-0.262123	-0.627271	1.70115	0.286339	S				0.996943	104.05	91	0.471164	0.148785	0.201649	-0.804637	-0.102702	0.274525	TDSDGWCTFEAKKKGSGEDDEEETETTPTST	_KKGS(ph)GEDDEEETETTPTSTVPVATIAQETLK_	P12962	S000005802	YOR276W	CAF20	Cap Associated Factor	Phosphoprotein of the mRNA cap-binding complex; involved in translational control; repressor of cap-dependent translation initiation; competes with eIF4G for binding to eIF4E
0.0885487	0.032242	2.02785	1.46041	-0.0151846	-0.0802557	0.638591	0.363568	0.20364	0.274292	2.08094	1.31775	S				0.999746	206.62	78	0.772658	0.566363	0.920418	0.902263	0.22668	0.969156	GRPKIKHNKPKVTTDSDGWCTFEAKKKGSGE	_VTTDS(ph)DGWCTFEAK_	P12962	S000005802	YOR276W	CAF20	Cap Associated Factor	Phosphoprotein of the mRNA cap-binding complex; involved in translational control; repressor of cap-dependent translation initiation; competes with eIF4G for binding to eIF4E
-0.133052	-0.314481	0.437819	0.275577	-0.151586	-0.209728	0.15608	0.178584	0.0302654	-0.363605	0.364348	0.14452	S				1	142.3	764	0.137237	0.0215101	0.10113	0.0664653	-0.00666267	0.0438821	KGSGREAYAAQKFEGSDDDENHPLPPLNVAK	_FEGS(ph)DDDENHPLPPLNVAK_	P13185	S000002529	YDR122W	KIN1	KINase	Serine/threonine protein kinase involved in regulation of exocytosis; localizes to the cytoplasmic face of the plasma membrane; KIN1 has a paralog, KIN2, that arose from the whole genome duplication
0.637749	0.59321	NaN	NaN	NaN	NaN	NaN	NaN	NaN	NaN	NaN	NaN	S				0.755724	97.059	27	1.63781	0	0	0.61548	NaN	NaN	MGRGNQQDDGNSESNSMHTQPSTMAPATLRM	_GNQQDDGNSESNS(ph)MHTQPSTMAPATLR_	P13185	S000002529	YDR122W	KIN1	KINase	Serine/threonine protein kinase involved in regulation of exocytosis; localizes to the cytoplasmic face of the plasma membrane; KIN1 has a paralog, KIN2, that arose from the whole genome duplication
0.361544	0.0439044	-1.18878	-1.55405	NaN	NaN	-1.28635	-0.795185	-0.136014	-0.16882	NaN	NaN	S				0.993377	147.09	593	0.526003	0.831149	1.1659	-0.584345	-1.04077	-0.152417	VLIPPRLAMPEQAHTSPTSRKSSDNQRREME	_LAMPEQAHTS(ph)PTSR_	P13185	S000002529	YDR122W	KIN1	KINase	Serine/threonine protein kinase involved in regulation of exocytosis; localizes to the cytoplasmic face of the plasma membrane; KIN1 has a paralog, KIN2, that arose from the whole genome duplication
NaN	NaN	NaN	NaN	-0.452846	-0.618717	NaN	NaN	0.378512	-0.161298	NaN	NaN	S				1	47.499	521	0	1.0098	0.121218	NaN	-0.535781	0.108607	LDRKHAKIRNQQQRQSHENIEKLSEIPESVK	_NQQQRQS(ph)HENIEK_	P13185	S000002529	YDR122W	KIN1	KINase	Serine/threonine protein kinase involved in regulation of exocytosis; localizes to the cytoplasmic face of the plasma membrane; KIN1 has a paralog, KIN2, that arose from the whole genome duplication
0.06226	0.426855	NaN	NaN	NaN	NaN	NaN	NaN	0.276913	0.237441	2.73389	1.74884	S				0.932441	74.12	660	0.389559	0	0.880149	0.244558	NaN	1.24927	LSQRRKKTIEQTSVNSNNSINKPVQKTHSRA	_TIEQTSVNS(ph)NNS(ph)INKPVQK_	P13185	S000002529	YDR122W	KIN1	KINase	Serine/threonine protein kinase involved in regulation of exocytosis; localizes to the cytoplasmic face of the plasma membrane; KIN1 has a paralog, KIN2, that arose from the whole genome duplication
0.06226	0.426855	NaN	NaN	NaN	NaN	NaN	NaN	0.276913	0.237441	2.73389	1.74884	S				0.932441	74.12	663	0.389559	0	0.880149	0.244558	NaN	1.24927	RRKKTIEQTSVNSNNSINKPVQKTHSRAVSD	_TIEQTSVNS(ph)NNS(ph)INKPVQK_	P13185	S000002529	YDR122W	KIN1	KINase	Serine/threonine protein kinase involved in regulation of exocytosis; localizes to the cytoplasmic face of the plasma membrane; KIN1 has a paralog, KIN2, that arose from the whole genome duplication
1.14509	1.1891	0.023607	-0.236707	-0.0344558	1.50686	NaN	NaN	1.32423	1.54765	NaN	NaN	S				0.99892	124.84	24	0.604054	0.288569	1.30605	0.530272	0.7362	1.43594	YLVNPNFRTSKGGSLSPTPEAFNDTRVAAPA	_GGSLS(ph)PTPEAFNDTR_	P13186	S000004086	YLR096W	KIN2	KINase	Serine/threonine protein kinase involved in regulation of exocytosis; localizes to the cytoplasmic face of the plasma membrane; KIN2 has a paralog, KIN1, that arose from the whole genome duplication
0.435842	-1.04127	NaN	NaN	NaN	NaN	NaN	NaN	NaN	NaN	NaN	NaN	S				0.999808	186.77	888	0.123573	0	0	-0.302713	NaN	NaN	TTYSNDTNNRLTSVYSQELTEKQILEEASKA	_LTSVYS(ph)QELTEK_	P13186	S000004086	YLR096W	KIN2	KINase	Serine/threonine protein kinase involved in regulation of exocytosis; localizes to the cytoplasmic face of the plasma membrane; KIN2 has a paralog, KIN1, that arose from the whole genome duplication
-0.730488	-0.763881	NaN	NaN	NaN	NaN	NaN	NaN	NaN	NaN	NaN	NaN	S				1	141.08	151	1.847	0	0	-0.747185	NaN	NaN	AYLHKQHSLPSPKNESEILERQKRLEKEIAR	_NES(ph)EILER_	P13186	S000004086	YLR096W	KIN2	KINase	Serine/threonine protein kinase involved in regulation of exocytosis; localizes to the cytoplasmic face of the plasma membrane; KIN2 has a paralog, KIN1, that arose from the whole genome duplication
NaN	NaN	1.05508	-0.211386	NaN	NaN	0.603271	0.89714	NaN	NaN	NaN	NaN	S				1	48.823	641	0.203509	0.909638	0	0.421848	0.750205	NaN	LKSTPVPVSGEYQQRSASPVVGEHQEKNTIG	_S(ph)AS(ph)PVVGEHQEK_	P13186	S000004086	YLR096W	KIN2	KINase	Serine/threonine protein kinase involved in regulation of exocytosis; localizes to the cytoplasmic face of the plasma membrane; KIN2 has a paralog, KIN1, that arose from the whole genome duplication
0.475292	0.571822	0.114441	0.427285	0.512884	0.141956	0.5661	0.93669	0.332507	0.344374	NaN	NaN	S				1	110.55	643	1.55697	1.3455	1.95235	0.39721	0.539408	0.338441	STPVPVSGEYQQRSASPVVGEHQEKNTIGGI	_S(ph)AS(ph)PVVGEHQEK_	P13186	S000004086	YLR096W	KIN2	KINase	Serine/threonine protein kinase involved in regulation of exocytosis; localizes to the cytoplasmic face of the plasma membrane; KIN2 has a paralog, KIN1, that arose from the whole genome duplication
-0.354427	-0.857652	-3.48491	-2.89087	NaN	NaN	NaN	NaN	NaN	NaN	-3.08634	-3.02922	S				0.999062	112.5	706	1.05284	0	2.22579	-1.89697	NaN	-3.05778	NEISIKVPKSHSRTISDYIPSARRYPSYVPN	_TIS(ph)DYIPSAR_	P13186	S000004086	YLR096W	KIN2	KINase	Serine/threonine protein kinase involved in regulation of exocytosis; localizes to the cytoplasmic face of the plasma membrane; KIN2 has a paralog, KIN1, that arose from the whole genome duplication
NaN	NaN	-1.52196	0.123073	NaN	NaN	NaN	NaN	NaN	NaN	-1.93889	-0.197362	S				1	162.31	549	0.258558	0	0.361092	-0.699441	NaN	-1.06813	QQQVALGTKVALNNNSPDIMTKMRSPQKEVV	_VALNNNS(ph)PDIMTK_	P13186	S000004086	YLR096W	KIN2	KINase	Serine/threonine protein kinase involved in regulation of exocytosis; localizes to the cytoplasmic face of the plasma membrane; KIN2 has a paralog, KIN1, that arose from the whole genome duplication
NaN	NaN	NaN	NaN	-1.36777	-1.64697	0.0540028	-0.0724488	NaN	NaN	NaN	NaN	S				0.999973	117.65	16	0	0.742101	0	NaN	-0.758296	NaN	MANPTTGKSSIRAKLSNSSLSNLFKKNKNKR	_AKLS(ph)NS(ph)SLSNLFK_	P13259	S000003434	YGR202C	PCT1	Phosphocholine CytidylylTransferase	Cholinephosphate cytidylyltransferase; a rate-determining enzyme of the CDP-choline pathway for phosphatidylcholine synthesis, inhibited by Sec14p, activated upon lipid-binding; contains an element within the regulatory domain involved in both silencing and activation of enzymatic activity
NaN	NaN	NaN	NaN	NaN	NaN	1.21237	-0.326537	NaN	NaN	NaN	NaN	S				0.77851	117.65	19	0	0.175554	0	NaN	0.442915	NaN	PTTGKSSIRAKLSNSSLSNLFKKNKNKRQRE	_AKLS(ph)NSS(ph)LSNLFK_	P13259	S000003434	YGR202C	PCT1	Phosphocholine CytidylylTransferase	Cholinephosphate cytidylyltransferase; a rate-determining enzyme of the CDP-choline pathway for phosphatidylcholine synthesis, inhibited by Sec14p, activated upon lipid-binding; contains an element within the regulatory domain involved in both silencing and activation of enzymatic activity
0.0905825	-0.015943	0.292723	0.341062	0.0807941	0.00776951	0.166114	0.183048	0.0545011	-0.14315	-0.0309717	0.00702857	S				0.999945	167.88	346	0.899461	1.13014	0.258151	0.177106	0.109431	-0.0281479	NFLDDPFTRKLIREASPATEFANEFTGENST	_EAS(ph)PATEFANEFTGENSTAK_	P13259	S000003434	YGR202C	PCT1	Phosphocholine CytidylylTransferase	Cholinephosphate cytidylyltransferase; a rate-determining enzyme of the CDP-choline pathway for phosphatidylcholine synthesis, inhibited by Sec14p, activated upon lipid-binding; contains an element within the regulatory domain involved in both silencing and activation of enzymatic activity
0.435415	1.21922	0.203851	-0.30381	1.37801	0.0316775	0.389394	0.179662	NaN	NaN	NaN	NaN	S				0.997621	164.9	169	0.512014	0.695619	0	0.388668	0.494686	NaN	KPNILLPSKLRENLNSSPTSEFKSSIKRVNG	_LRENLNS(ph)S(ph)PTSEFK_	P13382	S000005046	YNL102W	POL1	POLymerase	Catalytic subunit of the DNA polymerase I alpha-primase complex; required for the initiation of DNA replication during mitotic DNA synthesis and premeiotic DNA synthesis
0.502738	0.545968	-1.01792	0.124031	1.37801	0.889707	NaN	NaN	0.081476	0.613815	0.408014	0.287149	S				0.98704	116.51	170	0.0351802	0.869599	1.27994	0.0387039	1.13386	0.347613	PNILLPSKLRENLNSSPTSEFKSSIKRVNGN	_LRENLNS(ph)S(ph)PTSEFK_	P13382	S000005046	YNL102W	POL1	POLymerase	Catalytic subunit of the DNA polymerase I alpha-primase complex; required for the initiation of DNA replication during mitotic DNA synthesis and premeiotic DNA synthesis
-0.382626	-0.209812	NaN	NaN	NaN	NaN	0.142736	0.052102	NaN	NaN	NaN	NaN	S				1	225.5	82	0.743069	0.55723	0	-0.296219	0.0974188	NaN	YVDRGVEEDWREVDNSSSDEDTGNLASKDSK	_EVDNS(ph)S(ph)S(ph)DEDTGNLASK_	P13382	S000005046	YNL102W	POL1	POLymerase	Catalytic subunit of the DNA polymerase I alpha-primase complex; required for the initiation of DNA replication during mitotic DNA synthesis and premeiotic DNA synthesis
-0.382626	-0.209812	NaN	NaN	NaN	NaN	0.142736	0.052102	NaN	NaN	NaN	NaN	S				1	225.5	83	0.743069	0.55723	0	-0.296219	0.0974188	NaN	VDRGVEEDWREVDNSSSDEDTGNLASKDSKR	_EVDNS(ph)S(ph)S(ph)DEDTGNLASK_	P13382	S000005046	YNL102W	POL1	POLymerase	Catalytic subunit of the DNA polymerase I alpha-primase complex; required for the initiation of DNA replication during mitotic DNA synthesis and premeiotic DNA synthesis
-0.382626	-0.209812	NaN	NaN	NaN	NaN	0.142736	0.052102	NaN	NaN	NaN	NaN	S				1	225.5	84	0.743069	0.55723	0	-0.296219	0.0974188	NaN	DRGVEEDWREVDNSSSDEDTGNLASKDSKRK	_EVDNS(ph)S(ph)S(ph)DEDTGNLASK_	P13382	S000005046	YNL102W	POL1	POLymerase	Catalytic subunit of the DNA polymerase I alpha-primase complex; required for the initiation of DNA replication during mitotic DNA synthesis and premeiotic DNA synthesis
-0.0606229	-0.0559212	NaN	NaN	-0.152757	0.0672257	NaN	NaN	NaN	NaN	NaN	NaN	S				0.971884	94.837	31	1.59059	0.116948	0	-0.0582721	-0.0427655	NaN	AARNGTSIDDYEGDESDGDRIYDEIDEKEYR	_NGTSIDDYEGDES(ph)DGDRIYDEIDEK_	P13382	S000005046	YNL102W	POL1	POLymerase	Catalytic subunit of the DNA polymerase I alpha-primase complex; required for the initiation of DNA replication during mitotic DNA synthesis and premeiotic DNA synthesis
0.997329	1.05235	0.00115464	0.334534	NaN	NaN	NaN	NaN	NaN	NaN	NaN	NaN	S				0.986986	125.73	240	0.987584	0	0	0.596341	NaN	NaN	RYANDVQDLLDDVENSPVVATKRQNVLQDTL	_YANDVQDLLDDVENS(ph)PVVATKR_	P13382	S000005046	YNL102W	POL1	POLymerase	Catalytic subunit of the DNA polymerase I alpha-primase complex; required for the initiation of DNA replication during mitotic DNA synthesis and premeiotic DNA synthesis
0.178746	0.184217	-0.347552	-0.0518593	0.131985	-0.02869	-0.0539454	0.0519824	0.107152	0.00891703	NaN	NaN	S				0.999997	171.26	400	0.0237905	0.229186	0.349553	-0.0091121	0.0253329	0.0580346	NRDFYSSNNNKEKLVSPSDPTSYMKYDEPVM	_LVS(ph)PSDPTSYMK_	P13574	S000001126	YHR084W	STE12	STErile	Transcription factor that is activated by a MAPK signaling cascade; activates genes involved in mating or pseudohyphal/invasive growth pathways; cooperates with Tec1p transcription factor to regulate genes specific for invasive growth
-0.140173	-0.462455	NaN	NaN	NaN	NaN	NaN	NaN	NaN	NaN	NaN	NaN	S				0.883147	127.3	376	0.504956	0	0	-0.301314	NaN	NaN	YPYQLSVAPTFPVPPSSSRQHFMTNRDFYSS	_YPYQLSVAPTFPVPPS(ph)SSR_	P13574	S000001126	YHR084W	STE12	STErile	Transcription factor that is activated by a MAPK signaling cascade; activates genes involved in mating or pseudohyphal/invasive growth pathways; cooperates with Tec1p transcription factor to regulate genes specific for invasive growth
0.542605	-0.0835692	0.281176	0.764126	0.300299	-0.23033	0.0222731	0.361917	0.533962	-0.0645856	0.164092	0.870414	S				0.999949	153.23	318	0.882556	0.331478	0.781897	0.376084	0.11354	0.375971	EQPDRPQPRLDRNRDSGYGVSVGRIREDPLL	_NRDS(ph)GYGVSVGR_	P13663	S000002565	YDR158W	HOM2	HOMoserine requiring	Aspartic beta semi-aldehyde dehydrogenase; catalyzes the second step in the common pathway for methionine and threonine biosynthesis; expression regulated by Gcn4p and the general control of amino acid synthesis
NaN	NaN	0.553871	-0.0561673	NaN	NaN	0.499422	-0.00705191	-0.0734844	-0.396289	0.544014	0.101645	S				0.991529	64.565	190	0.24846	0.293292	0.0773255	0.248852	0.246185	0.0439712	VKDARNQSQQFSKIESPSTRLPSSAKQDTKQ	_IES(ph)PSTRLPSSAK_	P13856	S000003384	YGR152C	RSR1	RaS-Related	GTP-binding protein of the Ras superfamily; required for bud site selection, morphological changes in response to mating pheromone, and efficient cell fusion; localized to the plasma membrane; significantly similar to mammalian Rap GTPases
NaN	NaN	NaN	NaN	NaN	NaN	NaN	NaN	1.07423	0.368601	NaN	NaN	S				0.999858	109.48	6	0	0	0.538245	NaN	NaN	0.721416	__________MAPVKSQESINQKLALVIKSG	_APVKS(ph)QESINQK_	P14120	S000002998	YGL030W	RPL30	Ribosomal Protein of the Large subunit	Ribosomal 60S subunit protein L30; involved in pre-rRNA processing in the nucleolus; autoregulates splicing of its transcript; homologous to mammalian ribosomal protein L30, no bacterial homolog
-0.0574968	-0.123041	0.0212626	0.0480244	0.114367	-0.0257203	0.0222731	0.00942268	-0.393179	-0.48348	NaN	NaN	S				1	270.08	720	0.279248	0.411158	1.18478	-0.0278127	0.0300856	-0.43833	DVAGLIGKADDEEDLSDENIQPELRGQ____	_ADDEEDLS(ph)DENIQPELR_	P14164	S000001595	YKL112W	ABF1	ARS-Binding Factor 1	DNA binding protein with possible chromatin-reorganizing activity; involved in transcriptional activation, gene silencing, and DNA replication and repair
NaN	NaN	0.844121	-0.419647	-0.107135	0.014641	0.443634	-0.054779	NaN	NaN	0.428741	-0.211884	S				1	68.481	618	0.100339	0.224048	0.101161	0.212237	0.0740904	0.108428	SSRNVVDENLINDMDSEDAHKSKRQHLSDIT	_NVVDENLINDMDS(ph)EDAHK_	P14164	S000001595	YKL112W	ABF1	ARS-Binding Factor 1	DNA binding protein with possible chromatin-reorganizing activity; involved in transcriptional activation, gene silencing, and DNA replication and repair
0.62714	1.26171	-0.923263	0.514326	-0.150017	-0.0307961	0.683831	0.787842	0.681314	1.08712	NaN	NaN	S				0.999998	162.68	467	0.317614	0.564672	0.842842	0.369978	0.322715	0.884219	NNNDGELSGTNLRSNSIDYAKHQEISSAGTS	_SNS(ph)IDYAK_	P14164	S000001595	YKL112W	ABF1	ARS-Binding Factor 1	DNA binding protein with possible chromatin-reorganizing activity; involved in transcriptional activation, gene silencing, and DNA replication and repair
1.17632	0.907198	NaN	NaN	NaN	NaN	NaN	NaN	NaN	NaN	NaN	NaN	S				0.994767	111.65	82	1.08736	0	0	1.04176	NaN	NaN	RYSPDRRHRTQFYRDSAHNSPVAPNRYAANL	_TQFYRDS(ph)AHNS(ph)PVAPNR_	P14180	S000000242	YBR038W	CHS2	CHitin Synthase	Chitin synthase II; catalyzes transfer of N-acetylglucosamine (GlcNAc) to chitin upon activation of zymogenic form; required for chitin synthesis in the primary septum during cytokinesis; localization regulated by Cdk1p during mitosis; phosphorylation by Dbf2p kinase regulates its dynamics and chitin synthesis during cytokinesis
1.17632	0.907198	NaN	NaN	NaN	NaN	NaN	NaN	NaN	NaN	NaN	NaN	S				0.999995	111.65	86	1.08736	0	0	1.04176	NaN	NaN	DRRHRTQFYRDSAHNSPVAPNRYAANLQESP	_TQFYRDS(ph)AHNS(ph)PVAPNR_	P14180	S000000242	YBR038W	CHS2	CHitin Synthase	Chitin synthase II; catalyzes transfer of N-acetylglucosamine (GlcNAc) to chitin upon activation of zymogenic form; required for chitin synthesis in the primary septum during cytokinesis; localization regulated by Cdk1p during mitosis; phosphorylation by Dbf2p kinase regulates its dynamics and chitin synthesis during cytokinesis
-0.0117189	0.23634	0.155229	-0.0186342	-0.00358228	-0.138029	-0.0529723	-0.112366	-0.0825911	-0.163882	0.0985365	0.0156805	S				1	167.34	313	0.605666	1.07268	0.219133	0.0903038	-0.0767374	-0.033064	TGIRDYVLNKKDYIMSPVGNPEGPEKPNKKF	_DYIMS(ph)PVGNPEGPEKPNKK_	P14540	S000001543	YKL060C	FBA1	FBA1	Fructose 1,6-bisphosphate aldolase; required for glycolysis and gluconeogenesis; catalyzes conversion of fructose 1,6 bisphosphate to glyceraldehyde-3-P and dihydroxyacetone-P; locates to mitochondrial outer surface upon oxidative stress; N-terminally propionylated in vivo
-0.340222	-0.0711484	NaN	NaN	-0.384621	-0.727571	0.179776	0.232142	-0.297147	0.0630888	-0.165172	-0.218843	S				1	153.22	76	0.433257	0.297742	0.854098	-0.205685	-0.175069	-0.154519	QTSNGGAAYFAGKGISNEGQNASIKGAIAAA	_GIS(ph)NEGQNASIK_	P14540	S000001543	YKL060C	FBA1	FBA1	Fructose 1,6-bisphosphate aldolase; required for glycolysis and gluconeogenesis; catalyzes conversion of fructose 1,6 bisphosphate to glyceraldehyde-3-P and dihydroxyacetone-P; locates to mitochondrial outer surface upon oxidative stress; N-terminally propionylated in vivo
0.323082	0.475707	-0.67735	-0.117163	NaN	NaN	-0.722991	-0.0223323	NaN	NaN	NaN	NaN	S				1	147.7	83	0.0013211	0.31845	0	0.00106897	-0.372661	NaN	AYFAGKGISNEGQNASIKGAIAAAHYIRSIA	_GISNEGQNAS(ph)IK_	P14540	S000001543	YKL060C	FBA1	FBA1	Fructose 1,6-bisphosphate aldolase; required for glycolysis and gluconeogenesis; catalyzes conversion of fructose 1,6 bisphosphate to glyceraldehyde-3-P and dihydroxyacetone-P; locates to mitochondrial outer surface upon oxidative stress; N-terminally propionylated in vivo
1.25447	1.16916	0.66454	2.14286	0.308011	0.155102	NaN	NaN	NaN	NaN	NaN	NaN	S				0.969824	79.652	247	1.62367	0.692454	0	1.30776	0.231556	NaN	VMSPYRRLSAYPPSTSPPLQPPFKQLRRDEV	_LSAYPPSTS(ph)PPLQPPFK_	P14680	S000003677	YJL141C	YAK1	Yet Another Kinase	Serine-threonine protein kinase; component of a glucose-sensing system that inhibits growth in response to glucose availability; upon nutrient deprivation Yak1p phosphorylates Pop2p to regulate mRNA deadenylation, the co-repressor Crf1p to inhibit transcription of ribosomal genes, and the stress-responsive transcription factors Hsf1p and Msn2p; nuclear localization negatively regulated by the Ras…
-1.80017	-2.14752	-0.85591	-1.79548	-0.478326	-0.979601	0.24255	-0.0932897	NaN	NaN	-2.05116	-2.61134	S				1	98.942	127	2.02306	0.520982	1.11849	-1.64977	-0.327167	-2.33125	DLNSNESLDAYRRRKSSLVVPPARAPAPNPF	_RKS(ph)S(ph)LVVPPAR_	P14680	S000003677	YJL141C	YAK1	Yet Another Kinase	Serine-threonine protein kinase; component of a glucose-sensing system that inhibits growth in response to glucose availability; upon nutrient deprivation Yak1p phosphorylates Pop2p to regulate mRNA deadenylation, the co-repressor Crf1p to inhibit transcription of ribosomal genes, and the stress-responsive transcription factors Hsf1p and Msn2p; nuclear localization negatively regulated by the Ras…
-1.80017	-2.14752	-0.85591	-1.79548	-0.478326	-0.979601	0.24255	-0.0932897	NaN	NaN	-2.05116	-2.61134	S				1	98.942	128	2.02306	0.520982	1.11849	-1.64977	-0.327167	-2.33125	LNSNESLDAYRRRKSSLVVPPARAPAPNPFQ	_RKS(ph)S(ph)LVVPPAR_	P14680	S000003677	YJL141C	YAK1	Yet Another Kinase	Serine-threonine protein kinase; component of a glucose-sensing system that inhibits growth in response to glucose availability; upon nutrient deprivation Yak1p phosphorylates Pop2p to regulate mRNA deadenylation, the co-repressor Crf1p to inhibit transcription of ribosomal genes, and the stress-responsive transcription factors Hsf1p and Msn2p; nuclear localization negatively regulated by the Ras…
0.719315	0.934026	-0.762561	-0.334797	NaN	NaN	NaN	NaN	NaN	NaN	NaN	NaN	S				1	186.77	56	0.121303	0	0	0.138996	NaN	NaN	DPLENKVNSTNIIEGSPKANPNPVKFMNTSE	_VNSTNIIEGS(ph)PK_	P14737	S000002625	YDR217C	RAD9	RADiation sensitive	DNA damage-dependent checkpoint protein; required for cell-cycle arrest in G1/S, intra-S, and G2/M, plays a role in postreplication repair (PRR) pathway; transmits checkpoint signal by activating Rad53p and Chk1p; hyperphosphorylated by Mec1p and Tel1p; multiple cyclin dependent kinase consensus sites and the C-terminal BRCT domain contribute to DNA damage checkpoint activation; Rad9p Chk1 Activa…
-0.707736	-0.796887	0.60564	-0.0716254	-0.832	-0.746737	0.768174	0.00400182	-0.723229	-0.72867	0.396156	-0.115033	S				1	106.62	332	0.292243	0.202656	0.444592	-0.242652	-0.20164	-0.292694	DGELHIHRSRREVGASMTRSIQTLEMELAQI	_REVGAS(ph)MT(ph)R_	P14742	S000001587	YKL104C	GFA1	Glutamine:Fructose-6-phosphate Amidotransferase	Glutamine-fructose-6-phosphate amidotransferase; catalyzes the formation of glucosamine-6-P and glutamate from fructose-6-P and glutamine in the first step of chitin biosynthesis; GFA1 has a paralogous region, comprising ORFs YMR084W-YMR085W, that arose from the whole genome duplication
0.296193	0.00733906	NaN	NaN	NaN	NaN	-0.599032	-0.128293	0.0398403	-0.0566563	NaN	NaN	S				0.946072	138.55	489	0.314949	0.436892	0.0505309	0.151766	-0.363663	-0.00840801	QAGKSEATPQPATSASPKHASILDDEHRRKA	_SEATPQPATSAS(ph)PK_	P14747	S000004521	YML057W	CMP2	CalModulin binding Protein	Calcineurin A; one isoform (the other is Cna1p) of the catalytic subunit of calcineurin, a Ca++/calmodulin-regulated protein phosphatase which regulates Crz1p (a stress-response transcription factor), the other calcineurin subunit is CNB1; regulates the function of Aly1p alpha-arrestin; CMP2 has a paralog, CNA1, that arose from the whole genome duplication
-0.934814	-0.0571965	0.137203	-1.15788	-0.190141	0.209141	0.164965	-0.611172	NaN	NaN	NaN	NaN	S				0.998898	132.08	895	0.671182	0.211827	0	-0.503173	-0.106802	NaN	DNGNESDVQTEHRSESEVDEPLQLKVTESET	_SES(ph)EVDEPLQLK_	P14772	S000003938	YLL015W	BPT1	Bile Pigment Transporter	ABC type transmembrane transporter of MRP/CFTR family; found in vacuolar membrane, involved in the transport of unconjugated bilirubin and in heavy metal detoxification via glutathione conjugates, along with Ycf1p
0.283922	0.0886844	0.141048	0.66935	0.284633	-0.0903881	NaN	NaN	0.485427	0.240742	0.223947	0.117459	S				0.988025	169.67	145	0.960618	0.157545	1.38185	0.295751	0.0971222	0.266893	VVDGYDIVKKVESLGSPSGATKARIVVAKSG	_KVESLGS(ph)PSGATK_	P14832	S000002562	YDR155C	CPR1	Cyclosporin A-sensitive Proline Rotamase	Cytoplasmic peptidyl-prolyl cis-trans isomerase (cyclophilin); catalyzes the cis-trans isomerization of peptide bonds N-terminal to proline residues; binds the drug cyclosporin A; N-terminally propionylated in vivo; protein abundance increases in response to DNA replication stress
0.0565835	-0.184277	0.65179	0.733819	-0.373645	-0.719733	0.712953	0.556924	NaN	NaN	NaN	NaN	S				0.948173	114.06	815	0.592064	0.0421068	0	0.314479	0.0441249	NaN	PPQEASPAEEATKAASVSPSTKPLNTEPESS	_AAS(ph)VS(ph)PSTKPLNTEPESSSVQPTVSSESSTTK_	P14922	S000000316	YBR112C	CYC8	CYtochrome C	General transcriptional co-repressor; acts together with Tup1p; also acts as part of a transcriptional co-activator complex that recruits the SWI/SNF and SAGA complexes to promoters; can form the prion [OCT+]
-0.233566	-0.940894	0.65179	0.733819	-0.373645	-0.719733	0.712953	0.556924	NaN	NaN	NaN	NaN	S				0.816021	114.06	817	0.0444777	0.0421068	0	0.0527874	0.0441249	NaN	QEASPAEEATKAASVSPSTKPLNTEPESSSV	_AAS(ph)VS(ph)PSTKPLNTEPESSSVQPTVSSESSTTK_	P14922	S000000316	YBR112C	CYC8	CYtochrome C	General transcriptional co-repressor; acts together with Tup1p; also acts as part of a transcriptional co-activator complex that recruits the SWI/SNF and SAGA complexes to promoters; can form the prion [OCT+]
NaN	NaN	NaN	NaN	NaN	NaN	NaN	NaN	-0.647829	-1.01517	NaN	NaN	S				0.990811	84.689	741	0	0	0.858861	NaN	NaN	-0.8315	GITNAEPQVKKQKLNSPNSNINKLVNTATSI	_QKLNS(ph)PNSNINK_	P14922	S000000316	YBR112C	CYC8	CYtochrome C	General transcriptional co-repressor; acts together with Tup1p; also acts as part of a transcriptional co-activator complex that recruits the SWI/SNF and SAGA complexes to promoters; can form the prion [OCT+]
-0.792807	-0.831871	0.919342	0.288294	-0.607221	-0.970441	0.607441	0.241015	-0.787742	-1.01897	1.06034	0.482412	S				0.999995	138.91	943	0.0843211	0.185509	0.0441536	-0.104261	-0.182302	-0.0659897	EEAKMREEEQTSQEKSPQENTLPRENVVRQV	_MREEEQTSQEKS(ph)PQENTLPR_	P14922	S000000316	YBR112C	CYC8	CYtochrome C	General transcriptional co-repressor; acts together with Tup1p; also acts as part of a transcriptional co-activator complex that recruits the SWI/SNF and SAGA complexes to promoters; can form the prion [OCT+]
-0.33388	-0.813931	NaN	NaN	0.0123541	-0.339272	0.97517	0.625979	NaN	NaN	NaN	NaN	S				0.999887	104.38	768	0.598289	0.442706	0	-0.573905	0.318558	NaN	ATSIEENAKSEVSNQSPAVVESNTNNTSQEE	_SEVSNQS(ph)PAVVESNTNNTSQEEKPVK_	P14922	S000000316	YBR112C	CYC8	CYtochrome C	General transcriptional co-repressor; acts together with Tup1p; also acts as part of a transcriptional co-activator complex that recruits the SWI/SNF and SAGA complexes to promoters; can form the prion [OCT+]
0.146134	0.318346	NaN	NaN	0.330788	0.345396	-0.075738	-0.169797	NaN	NaN	NaN	NaN	S				0.811409	101.48	774	0.645829	0.317116	0	0.23224	0.107662	NaN	NAKSEVSNQSPAVVESNTNNTSQEEKPVKAN	_SEVSNQSPAVVES(ph)NTNNTSQEEKPVK_	P14922	S000000316	YBR112C	CYC8	CYtochrome C	General transcriptional co-repressor; acts together with Tup1p; also acts as part of a transcriptional co-activator complex that recruits the SWI/SNF and SAGA complexes to promoters; can form the prion [OCT+]
-0.142592	-0.0921864	1.15056	0.618606	-0.0852977	-0.240282	NaN	NaN	NaN	NaN	NaN	NaN	S				0.819322	131.94	429	0.518796	0.548459	0	0.383597	-0.16279	NaN	NPGNINKSNGAPTNASPAPPPVILQPTLQPN	_SNGAPTNAS(ph)PAPPPVILQPTLQPNDQGNPLNTR_	P14922	S000000316	YBR112C	CYC8	CYtochrome C	General transcriptional co-repressor; acts together with Tup1p; also acts as part of a transcriptional co-activator complex that recruits the SWI/SNF and SAGA complexes to promoters; can form the prion [OCT+]
-0.196442	-0.403027	0.165143	0.156708	NaN	NaN	NaN	NaN	NaN	NaN	0.353266	0.178894	S				0.973708	77.045	710	0.185061	0	0.695549	-0.0694046	NaN	0.26608	DAAVSSSTHTENNTKSPRQPTHAIPTQAPAT	_YMEGAIHTLVDAAVSSSTHTENNTKS(ph)PR_	P14922	S000000316	YBR112C	CYC8	CYtochrome C	General transcriptional co-repressor; acts together with Tup1p; also acts as part of a transcriptional co-activator complex that recruits the SWI/SNF and SAGA complexes to promoters; can form the prion [OCT+]
-0.50664	-0.740119	NaN	NaN	-0.672772	-0.664174	NaN	NaN	-0.636481	-1.03021	1.73822	0.217961	S				0.997061	121.94	58	0.928655	2.38781	0.0392779	-0.623379	-0.668473	0.0723723	GVVVDDETPPLEQQDSHESLAADSRNANFSY	_KIGDEQAGVVVDDETPPLEQQDS(ph)HES(ph)LAADSR_	P15274	S000004498	YML035C	AMD1	AMP Deaminase	AMP deaminase; tetrameric enzyme that catalyzes the deamination of AMP to form IMP and ammonia; thought to be involved in regulation of intracellular purine (adenine, guanine, and inosine) nucleotide pools
-0.50664	-0.740119	NaN	NaN	NaN	NaN	NaN	NaN	-0.636481	-1.03021	1.73822	0.217961	S				0.997061	83.435	61	0.928655	0	0.0392779	-0.623379	NaN	0.0723723	VDDETPPLEQQDSHESLAADSRNANFSYHEN	_KIGDEQAGVVVDDETPPLEQQDS(ph)HES(ph)LAADSR_	P15274	S000004498	YML035C	AMD1	AMP Deaminase	AMP deaminase; tetrameric enzyme that catalyzes the deamination of AMP to form IMP and ammonia; thought to be involved in regulation of intracellular purine (adenine, guanine, and inosine) nucleotide pools
-0.717003	-0.66692	NaN	NaN	-0.970526	-0.835368	1.64634	0.55112	-0.709505	-0.838667	NaN	NaN	S				0.999994	142.23	19	1.63773	0.0532492	1.27581	-0.691961	0.097891	-0.774086	QATQRLNDLSLEPAPSHDEQDGSGLVIDIDQ	_LNDLSLEPAPS(ph)HDEQDGSGLVIDIDQR_	P15274	S000004498	YML035C	AMD1	AMP Deaminase	AMP deaminase; tetrameric enzyme that catalyzes the deamination of AMP to form IMP and ammonia; thought to be involved in regulation of intracellular purine (adenine, guanine, and inosine) nucleotide pools
-1.35491	-0.703783	-3.02015	-2.94755	-0.428915	-0.0207063	-1.09051	-0.985355	NaN	NaN	-2.70854	-2.79512	S				0.997774	129.46	138	1.39122	1.06669	1.99938	-2.0066	-0.631373	-2.75183	ADHASQNSGGKPRTLSASAQHILPETLKSFA	_TLS(ph)ASAQHILPETLK_	P15274	S000004498	YML035C	AMD1	AMP Deaminase	AMP deaminase; tetrameric enzyme that catalyzes the deamination of AMP to form IMP and ammonia; thought to be involved in regulation of intracellular purine (adenine, guanine, and inosine) nucleotide pools
NaN	NaN	NaN	NaN	NaN	NaN	-0.15017	-0.277866	-1.01546	-1.74063	-2.50174	-1.82289	S				0.998089	113.24	30	0	0.733835	1.99656	NaN	-0.214018	-1.77018	DDEDTPQLEKKIKRQSIDHGVGSEPVSTIEI	_RQS(ph)IDHGVGSEPVSTIEIIPSDSFR_	P15436	S000002260	YDL102W	POL3	POLymerase	Catalytic subunit of DNA polymerase delta; required for chromosomal DNA replication during mitosis and meiosis, intragenic recombination, repair of double strand DNA breaks, and DNA replication during nucleotide excision repair (NER)
-0.0284399	-0.125242	-0.606253	-0.599223	0.160791	-0.276101	NaN	NaN	0.0553346	-0.144058	NaN	NaN	S				0.999986	72.607	577	0.946508	0.0779381	0.134617	-0.339789	-0.0576548	-0.0443618	GNGGRTLSQSSIRRRSFNVGSRFSSINPATR	_S(ph)FNVGSR_	P15442	S000002691	YDR283C	GCN2	General Control Nonderepressible	Protein kinase; phosphorylates the alpha-subunit of translation initiation factor eIF2 (Sui2p) in response to starvation; activated by uncharged tRNAs and the Gcn1p-Gcn20p complex; contributes to DNA damage checkpoint control
0.430927	0.435309	-0.41738	0.326227	0.0747794	-0.139633	0.325612	0.339546	0.633292	0.684639	-0.706199	-0.630592	S				0.999671	130.1	569	0.382137	0.552824	0.00394144	0.193771	0.150076	-0.00471497	PGDTITVRGNGGRTLSQSSIRRRSFNVGSRF	_TLS(ph)QSS(ph)IR_	P15442	S000002691	YDR283C	GCN2	General Control Nonderepressible	Protein kinase; phosphorylates the alpha-subunit of translation initiation factor eIF2 (Sui2p) in response to starvation; activated by uncharged tRNAs and the Gcn1p-Gcn20p complex; contributes to DNA damage checkpoint control
-0.204699	-0.210246	NaN	NaN	0.0684644	0.0207689	0.0861245	0.300555	-0.141892	-0.25472	-0.706199	-0.630592	S				0.99415	130.1	572	2.07006	0.820594	1.28303	-0.207472	0.118978	-0.433351	TITVRGNGGRTLSQSSIRRRSFNVGSRFSSI	_TLS(ph)QSS(ph)IR_	P15442	S000002691	YDR283C	GCN2	General Control Nonderepressible	Protein kinase; phosphorylates the alpha-subunit of translation initiation factor eIF2 (Sui2p) in response to starvation; activated by uncharged tRNAs and the Gcn1p-Gcn20p complex; contributes to DNA damage checkpoint control
-0.222869	-0.260428	0.482714	0.191689	-0.395302	-0.357622	0.707124	0.26112	-0.213588	-0.569244	0.639625	0.179449	S				1	193.8	183	0.0940609	0.0696302	0.0112712	0.0477766	0.0538299	0.00906061	KSPAPVSKKEPVKTPSPAPAAKISSRVNDNN	_KEPVKT(ph)PS(ph)PAPAAK_	P15891	S000000684	YCR088W	ABP1	Actin Binding Protein	Actin-binding protein of the cortical actin cytoskeleton; important for activation of the Arp2/3 complex that plays a key role actin in cytoskeleton organization; inhibits barbed-end actin filament elongation; phosphorylation within its Proline-Rich Regio, mediated by Cdc28p and Pho85p, protects Abp1p from proteolysis mediated by its own PEST sequences; mammalian homologue of HIP-55 (hematopoieti…
NaN	NaN	NaN	NaN	0.158725	0.364797	0.235501	0.24267	NaN	NaN	0.513584	0.234279	S				0.91892	98.508	167	0	2.00794	0.642929	NaN	0.250423	0.373931	QGKASTPPVKKSFTPSKSPAPVSKKEPVKTP	_SFTPS(ph)KSPAPVSKK_	P15891	S000000684	YCR088W	ABP1	Actin Binding Protein	Actin-binding protein of the cortical actin cytoskeleton; important for activation of the Arp2/3 complex that plays a key role actin in cytoskeleton organization; inhibits barbed-end actin filament elongation; phosphorylation within its Proline-Rich Regio, mediated by Cdc28p and Pho85p, protects Abp1p from proteolysis mediated by its own PEST sequences; mammalian homologue of HIP-55 (hematopoieti…
0.1956	0.546561	0.652244	0.468911	-0.368179	-0.410083	1.20476	0.59131	-0.0417141	-0.201958	0.874561	0.467653	S				0.99999	241.87	169	1.7576	0.249712	0.462053	0.465829	0.254453	0.274635	KASTPPVKKSFTPSKSPAPVSKKEPVKTPSP	_SFTPSKS(ph)PAPVSK_	P15891	S000000684	YCR088W	ABP1	Actin Binding Protein	Actin-binding protein of the cortical actin cytoskeleton; important for activation of the Arp2/3 complex that plays a key role actin in cytoskeleton organization; inhibits barbed-end actin filament elongation; phosphorylation within its Proline-Rich Regio, mediated by Cdc28p and Pho85p, protects Abp1p from proteolysis mediated by its own PEST sequences; mammalian homologue of HIP-55 (hematopoieti…
0.372061	0.631896	NaN	NaN	NaN	NaN	2.31969	0.386506	NaN	NaN	NaN	NaN	S				1	69.451	458	0.792563	0.403521	0	0.501978	1.3531	NaN	EDEAAQPPLPSRNVASGAPVQKEEPEQEEIA	_NVAS(ph)GAPVQK_	P15891	S000000684	YCR088W	ABP1	Actin Binding Protein	Actin-binding protein of the cortical actin cytoskeleton; important for activation of the Arp2/3 complex that plays a key role actin in cytoskeleton organization; inhibits barbed-end actin filament elongation; phosphorylation within its Proline-Rich Regio, mediated by Cdc28p and Pho85p, protects Abp1p from proteolysis mediated by its own PEST sequences; mammalian homologue of HIP-55 (hematopoieti…
NaN	NaN	NaN	NaN	NaN	NaN	0.503057	0.351571	NaN	NaN	NaN	NaN	S				0.929651	61.963	475	0	0.952013	0	NaN	0.427314	NaN	APVQKEEPEQEEIAPSLPSRNSIPAPKQEEA	_NVASGAPVQKEEPEQEEIAPS(ph)LPSR_	P15891	S000000684	YCR088W	ABP1	Actin Binding Protein	Actin-binding protein of the cortical actin cytoskeleton; important for activation of the Arp2/3 complex that plays a key role actin in cytoskeleton organization; inhibits barbed-end actin filament elongation; phosphorylation within its Proline-Rich Regio, mediated by Cdc28p and Pho85p, protects Abp1p from proteolysis mediated by its own PEST sequences; mammalian homologue of HIP-55 (hematopoieti…
2.64589	2.69048	0.585215	1.28381	1.78818	2.02648	1.06975	1.40377	2.17521	2.30235	NaN	NaN	S				0.832089	101.04	481	1.39137	2.30103	1.74298	1.80135	1.57205	2.23878	EPEQEEIAPSLPSRNSIPAPKQEEAPEQAPE	_NVASGAPVQKEEPEQEEIAPSLPSRNS(ph)IPAPK_	P15891	S000000684	YCR088W	ABP1	Actin Binding Protein	Actin-binding protein of the cortical actin cytoskeleton; important for activation of the Arp2/3 complex that plays a key role actin in cytoskeleton organization; inhibits barbed-end actin filament elongation; phosphorylation within its Proline-Rich Regio, mediated by Cdc28p and Pho85p, protects Abp1p from proteolysis mediated by its own PEST sequences; mammalian homologue of HIP-55 (hematopoieti…
0.903424	1.17172	2.77556	1.88114	NaN	NaN	NaN	NaN	NaN	NaN	NaN	NaN	S				0.969813	66.267	514	1.55868	0	0	1.68296	NaN	NaN	IEEEAEEAAPQLPSRSSAAPPPPPRRATPEK	_S(ph)SAAPPPPPR_	P15891	S000000684	YCR088W	ABP1	Actin Binding Protein	Actin-binding protein of the cortical actin cytoskeleton; important for activation of the Arp2/3 complex that plays a key role actin in cytoskeleton organization; inhibits barbed-end actin filament elongation; phosphorylation within its Proline-Rich Regio, mediated by Cdc28p and Pho85p, protects Abp1p from proteolysis mediated by its own PEST sequences; mammalian homologue of HIP-55 (hematopoieti…
NaN	NaN	NaN	NaN	NaN	NaN	-3.3846	-4.04824	NaN	NaN	NaN	NaN	S				0.954971	109.44	208	0	1.2465	0	NaN	-3.71642	NaN	PQKDGKNHVKKIEVSSQESWGN_________	_KIEVSS(ph)QESWGN_	P15992	S000000276	YBR072W	HSP26	Heat Shock Protein	Small heat shock protein (sHSP) with chaperone activity; forms hollow, sphere-shaped oligomers that suppress unfolded proteins aggregation; long-lived protein that is preferentially retained in mother cells and forms cytoplasmic foci; oligomer activation requires heat-induced conformational change; also has mRNA binding activity
NaN	NaN	NaN	NaN	NaN	NaN	1.21167	0.110744	NaN	NaN	NaN	NaN	S				0.997583	100.58	211	0	0.354602	0	NaN	0.661205	NaN	DGKNHVKKIEVSSQESWGN____________	_KIEVSS(ph)QES(ph)WGN_	P15992	S000000276	YBR072W	HSP26	Heat Shock Protein	Small heat shock protein (sHSP) with chaperone activity; forms hollow, sphere-shaped oligomers that suppress unfolded proteins aggregation; long-lived protein that is preferentially retained in mother cells and forms cytoplasmic foci; oligomer activation requires heat-induced conformational change; also has mRNA binding activity
NaN	NaN	NaN	NaN	NaN	NaN	NaN	NaN	NaN	NaN	0.485358	0.0746993	S				0.92277	192.99	503	0	0	0.394928	NaN	NaN	0.280028	ARDDADEDEEDPDTRSSGKKKDASQEESLI_	_DDADEDEEDPDTRS(ph)SGK_	P16140	S000000331	YBR127C	VMA2	Vacuolar Membrane Atpase	Subunit B of V1 peripheral membrane domain of vacuolar H+-ATPase; an electrogenic proton pump found throughout the endomembrane system; contains nucleotide binding sites; also detected in the cytoplasm; protein abundance increases in response to DNA replication stress
NaN	NaN	NaN	NaN	NaN	NaN	0.410927	-0.197991	NaN	NaN	NaN	NaN	S				0.971316	192.99	504	0	0.104666	0	NaN	0.106468	NaN	RDDADEDEEDPDTRSSGKKKDASQEESLI__	_DDADEDEEDPDTRSS(ph)GK_	P16140	S000000331	YBR127C	VMA2	Vacuolar Membrane Atpase	Subunit B of V1 peripheral membrane domain of vacuolar H+-ATPase; an electrogenic proton pump found throughout the endomembrane system; contains nucleotide binding sites; also detected in the cytoplasm; protein abundance increases in response to DNA replication stress
-0.301764	-0.195368	0.534537	0.0725435	-0.0801794	0.320427	0.108394	-0.0504668	-0.438698	-0.443065	0.389319	-0.0319598	S				0.999989	120.77	515	0.0495609	0.322106	0.254881	0.0274873	0.0745437	-0.131101	DTRSSGKKKDASQEESLI_____________	_KKDASQEES(ph)LI_	P16140	S000000331	YBR127C	VMA2	Vacuolar Membrane Atpase	Subunit B of V1 peripheral membrane domain of vacuolar H+-ATPase; an electrogenic proton pump found throughout the endomembrane system; contains nucleotide binding sites; also detected in the cytoplasm; protein abundance increases in response to DNA replication stress
-0.0254413	0	0.0346479	-0.015212	NaN	NaN	0.164642	0.44136	-0.274407	-0.264339	-0.113967	0.00699962	S				1	124.25	4	0.0380033	0.564318	1.02102	-0.00150138	0.303001	-0.161429	____________MVLSDKELFAINKKAVEQG	_VLS(ph)DKELFAINKK_	P16140	S000000331	YBR127C	VMA2	Vacuolar Membrane Atpase	Subunit B of V1 peripheral membrane domain of vacuolar H+-ATPase; an electrogenic proton pump found throughout the endomembrane system; contains nucleotide binding sites; also detected in the cytoplasm; protein abundance increases in response to DNA replication stress
-0.121738	-0.752607	0.674706	0.328272	-0.33763	-0.857861	0.917161	0.463609	-0.17223	-0.743714	0.534809	0.209678	S				0.999947	162.29	313	0.0345674	0.0387553	0.0526134	0.0321582	0.0463196	-0.042864	GPLVLEYETYRYGGHSMSDPGTTYRTRDEIQ	_YGGHS(ph)MSDPGTTYR_	P16387	S000000980	YER178W	PDA1	Pyruvate Dehydrogenase Alpha	E1 alpha subunit of the pyruvate dehydrogenase (PDH) complex; catalyzes the direct oxidative decarboxylation of pyruvate to acetyl-CoA; phosphorylated; regulated by glucose; PDH complex is concentrated in spots within the mitochondrial matrix, often near the ERMES complex and near peroxisomes
-0.157979	-0.687405	NaN	NaN	NaN	NaN	NaN	NaN	NaN	NaN	NaN	NaN	S				0.842661	114.24	315	0.448318	0	0	-0.422692	NaN	NaN	LVLEYETYRYGGHSMSDPGTTYRTRDEIQHM	_YGGHSMS(ph)DPGTTYR_	P16387	S000000980	YER178W	PDA1	Pyruvate Dehydrogenase Alpha	E1 alpha subunit of the pyruvate dehydrogenase (PDH) complex; catalyzes the direct oxidative decarboxylation of pyruvate to acetyl-CoA; phosphorylated; regulated by glucose; PDH complex is concentrated in spots within the mitochondrial matrix, often near the ERMES complex and near peroxisomes
-0.795308	-1.15457	NaN	NaN	NaN	NaN	NaN	NaN	NaN	NaN	NaN	NaN	S				0.804741	153.11	642	0.93556	0	0	-0.974939	NaN	NaN	EFVKKCPAAKAYEELSNTDLEFKFPEPGYLE	_AYEELS(ph)NTDLEFK_	P16521	S000004239	YLR249W	YEF3	Yeast Elongation Factor	Gamma subunit of translational elongation factor eEF1B; stimulates the binding of aminoacyl-tRNA (AA-tRNA) to ribosomes by releasing eEF1A (Tef1p/Tef2p) from the ribosomal complex; contains two ABC cassettes; binds and hydrolyzes ATP; YEF3 has a paralog, HEF3, that arose from the whole genome duplication
0.157173	0.182184	-0.123799	-0.110764	0.786847	0.796515	-0.935761	-0.606063	0.124857	0.113434	-0.0558898	-0.00561564	S				1	209.43	1039	0.111789	0.00732963	0.404348	0.0261986	0.0103843	0.0441965	KERMKKKKELGDAYVSSDEEF__________	_ELGDAYVS(ph)S(ph)DEEF_	P16521	S000004239	YLR249W	YEF3	Yeast Elongation Factor	Gamma subunit of translational elongation factor eEF1B; stimulates the binding of aminoacyl-tRNA (AA-tRNA) to ribosomes by releasing eEF1A (Tef1p/Tef2p) from the ribosomal complex; contains two ABC cassettes; binds and hydrolyzes ATP; YEF3 has a paralog, HEF3, that arose from the whole genome duplication
0.157173	0.182184	-0.123799	-0.110764	0.00963388	0.0688772	-0.0976109	-0.0454429	0.124857	0.113434	-0.0558898	-0.00561564	S				1	209.43	1040	0.111789	0.165669	0.404348	0.0261986	-0.0161357	0.0441965	ERMKKKKELGDAYVSSDEEF___________	_ELGDAYVS(ph)S(ph)DEEF_	P16521	S000004239	YLR249W	YEF3	Yeast Elongation Factor	Gamma subunit of translational elongation factor eEF1B; stimulates the binding of aminoacyl-tRNA (AA-tRNA) to ribosomes by releasing eEF1A (Tef1p/Tef2p) from the ribosomal complex; contains two ABC cassettes; binds and hydrolyzes ATP; YEF3 has a paralog, HEF3, that arose from the whole genome duplication
0.887993	1.057	-0.756767	0.0474279	0.611456	1.04907	-0.610322	0.0386137	0.885574	1.12565	-0.753519	0.0788075	S				0.996906	102.53	1015	0.28931	0.297457	0.309654	0.308913	0.272205	0.334128	AMGNKIAGGKKKKKLSSAELRKKKKERMKKK	_KLS(ph)SAELR_	P16521	S000004239	YLR249W	YEF3	Yeast Elongation Factor	Gamma subunit of translational elongation factor eEF1B; stimulates the binding of aminoacyl-tRNA (AA-tRNA) to ribosomes by releasing eEF1A (Tef1p/Tef2p) from the ribosomal complex; contains two ABC cassettes; binds and hydrolyzes ATP; YEF3 has a paralog, HEF3, that arose from the whole genome duplication
0.1133	0.373732	-0.603407	0.271722	NaN	NaN	-0.942383	0.0246339	0.242206	0.249991	NaN	NaN	S				1	52.579	102	0.0597254	0.286814	1.99703	0.038837	-0.458875	0.246099	RTPKIEKQYREIGGGSPIRKWSEYQATEVCK	_EIGGGS(ph)PIRK_	P16622	S000005702	YOR176W	HEM15	HEMe biosynthesis	Ferrochelatase; a mitochondrial inner membrane protein, catalyzes the insertion of ferrous iron into protoporphyrin IX, the eighth and final step in the heme biosynthetic pathway
-0.00913223	-0.159912	0.675765	0.237711	NaN	NaN	NaN	NaN	NaN	NaN	NaN	NaN	S				0.99447	90.731	188	0.416554	0	0	0.186108	NaN	NaN	AFLEATSEDEIISRASSDASDLLRQTLGSSQ	_AS(ph)SDASDLLR_	P16861	S000003472	YGR240C	PFK1	PhosphoFructoKinase	Alpha subunit of heterooctameric phosphofructokinase; involved in glycolysis, indispensable for anaerobic growth, activated by fructose-2,6-bisphosphate and AMP, mutation inhibits glucose induction of cell cycle-related genes
-0.204582	-0.230922	0.610896	-0.0110662	-0.367471	-0.825619	0.877023	0.528178	NaN	NaN	0.156145	0.0902807	S				0.998398	161.48	189	0.0718451	0.045171	0.779191	0.0410813	0.0530275	0.123213	FLEATSEDEIISRASSDASDLLRQTLGSSQK	_ASS(ph)DASDLLR_	P16861	S000003472	YGR240C	PFK1	PhosphoFructoKinase	Alpha subunit of heterooctameric phosphofructokinase; involved in glycolysis, indispensable for anaerobic growth, activated by fructose-2,6-bisphosphate and AMP, mutation inhibits glucose induction of cell cycle-related genes
NaN	NaN	NaN	NaN	NaN	NaN	NaN	NaN	NaN	NaN	NaN	NaN	S				0.999922	83.204	192	0	0	0	NaN	NaN	NaN	ATSEDEIISRASSDASDLLRQTLGSSQKKKK	_ASS(ph)DAS(ph)DLLR_	P16861	S000003472	YGR240C	PFK1	PhosphoFructoKinase	Alpha subunit of heterooctameric phosphofructokinase; involved in glycolysis, indispensable for anaerobic growth, activated by fructose-2,6-bisphosphate and AMP, mutation inhibits glucose induction of cell cycle-related genes
0.0143553	-0.0178844	0.384546	0.0582927	-0.035387	-0.0975173	0.0505323	0.119338	NaN	NaN	NaN	NaN	S				0.999895	290.2	179	0.491789	0.066245	0	0.109827	0.0092415	NaN	TDSAPTSKDAFLEATSEDEIISRASSDASDL	_DAFLEATS(ph)EDEIISR_	P16861	S000003472	YGR240C	PFK1	PhosphoFructoKinase	Alpha subunit of heterooctameric phosphofructokinase; involved in glycolysis, indispensable for anaerobic growth, activated by fructose-2,6-bisphosphate and AMP, mutation inhibits glucose induction of cell cycle-related genes
0.244035	-0.103426	NaN	NaN	NaN	NaN	NaN	NaN	NaN	NaN	NaN	NaN	S				0.778718	62.999	831	0.121938	0	0	0.0703043	NaN	NaN	ENRNGKLLVRNEQASSVYSTQLLADIISEAS	_NEQASS(ph)VYSTQLLADIISEASK_	P16861	S000003472	YGR240C	PFK1	PhosphoFructoKinase	Alpha subunit of heterooctameric phosphofructokinase; involved in glycolysis, indispensable for anaerobic growth, activated by fructose-2,6-bisphosphate and AMP, mutation inhibits glucose induction of cell cycle-related genes
-0.656012	-0.837197	NaN	NaN	-0.686545	-0.84731	1.25998	0.487015	-0.821585	-1.0744	NaN	NaN	S				0.937016	123.83	163	1.11424	0.03532	1.07371	-0.746605	0.0532845	-0.94799	STKPTPPPAPEASAESGLSSKVHSYTDLAYR	_NAVSTKPTPPPAPEASAES(ph)GLSSK_	P16862	S000004818	YMR205C	PFK2	PhosphoFructoKinase	Beta subunit of heterooctameric phosphofructokinase; involved in glycolysis; indispensable for anaerobic growth; activated by fructose-2,6-bisphosphate and AMP; mutation inhibits glucose induction of cell cycle-related genes
-0.868911	-1.35875	0.936	0.0732111	-0.337011	-0.401787	0.0248247	-0.102188	-0.91251	-1.29339	0.921718	0.0747905	S				1	198.81	171	0.227787	0.874557	0.2308	-0.304612	-0.20404	-0.302349	APEASAESGLSSKVHSYTDLAYRMKTTDTYP	_VHS(ph)YTDLAYR_	P16862	S000004818	YMR205C	PFK2	PhosphoFructoKinase	Beta subunit of heterooctameric phosphofructokinase; involved in glycolysis; indispensable for anaerobic growth; activated by fructose-2,6-bisphosphate and AMP; mutation inhibits glucose induction of cell cycle-related genes
NaN	NaN	NaN	NaN	NaN	NaN	1.93203	-0.404794	NaN	NaN	NaN	NaN	S				0.99659	106.35	69	0	0.19964	0	NaN	0.763618	NaN	DNGEIPPVFKKDRRGSNLQSHEQKFENVQKE	_GS(ph)NLQSHEQKFENVQKE_	P16965	S000003240	YGR008C	STF2	STabilizing Factor	Protein involved in resistance to desiccation stress; Stf2p exhibits antioxidant properties, and its overexpression prevents ROS accumulation and apoptosis; binds to F0 sector of mitochondrial F1F0 ATPase in vitro and may modulate the inhibitory action of Inh1p and Stf1p; protein abundance increases in response to DNA replication stress; STF2 has a paralog, TMA10, that arose from the whole genome…
-0.35124	-0.748263	0.223778	-0.271187	-0.284194	-0.282737	0.268799	0.173189	-0.448371	-0.886086	0.417155	-0.252779	S				1	255.58	515	0.608413	0.0730044	0.444208	-0.286728	-0.0312357	-0.29252	DDSISSKIGPLVEDDSDEDQNDAISVRLQDK	_IGPLVEDDS(ph)DEDQNDAIS(ph)VR_	P17065	S000005216	YNL272C	SEC2	SECretory	Guanyl-nucleotide exchange factor for the small G-protein Sec4p; essential for post-Golgi vesicle transport and for autophagy; associates with the exocyst, via exocyst subunit Sec15p, on secretory vesicles
-0.708467	-0.488998	NaN	NaN	NaN	NaN	NaN	NaN	-0.117678	-0.385168	NaN	NaN	S				1	131.38	524	0.937802	0	0.506916	-0.598732	NaN	-0.251423	PLVEDDSDEDQNDAISVRLQDKALWKQDAKR	_IGPLVEDDS(ph)DEDQNDAIS(ph)VR_	P17065	S000005216	YNL272C	SEC2	SECretory	Guanyl-nucleotide exchange factor for the small G-protein Sec4p; essential for post-Golgi vesicle transport and for autophagy; associates with the exocyst, via exocyst subunit Sec15p, on secretory vesicles
-0.301906	-0.4466	0.858881	0.68096	-0.0324772	-0.171255	1.18876	0.712906	-0.0961442	-0.722325	NaN	NaN	S				0.859443	130.57	140	0.225561	0.557583	0.381159	0.197834	0.424483	-0.409234	GEHKDSLNGERAITPSNEGVKPNTSLEGMTS	_AITPS(ph)NEGVKPNTSLEGMTSS(ph)PMESTQQSK_	P17106	S000003821	YJR060W	CBF1	Centromere Binding Factor	Basic helix-loop-helix (bHLH) protein; forms homodimer to bind E-box consensus sequence CACGTG present at MET gene promoters and centromere DNA element I (CDEI); affects nucleosome positioning at this motif; associates with other transcription factors such as Met4p and Isw1p to mediate transcriptional activation or repression; associates with kinetochore proteins, required for chromosome segregat…
0.0787465	0.00360232	-0.642563	-0.141956	0.185105	0.10044	-0.746227	-0.660198	-0.000663834	-0.653854	NaN	NaN	S				0.940901	119.35	155	0.445447	0.473046	0.301592	-0.175543	-0.28022	-0.327259	SNEGVKPNTSLEGMTSSPMESTQQSKNDMLI	_AITPSNEGVKPNTSLEGMTS(ph)S(ph)PMESTQQSK_	P17106	S000003821	YJR060W	CBF1	Centromere Binding Factor	Basic helix-loop-helix (bHLH) protein; forms homodimer to bind E-box consensus sequence CACGTG present at MET gene promoters and centromere DNA element I (CDEI); affects nucleosome positioning at this motif; associates with other transcription factors such as Met4p and Isw1p to mediate transcriptional activation or repression; associates with kinetochore proteins, required for chromosome segregat…
-0.245489	-0.253017	-0.282855	-0.222186	-0.0522815	-0.280632	-0.397584	-0.462576	-0.153254	-0.722325	0.543635	0.408091	S				0.977967	139.73	156	3.5666	1.34169	0.0214949	-0.250887	-0.298268	0.0190369	NEGVKPNTSLEGMTSSPMESTQQSKNDMLIP	_AITPSNEGVKPNTSLEGMTS(ph)S(ph)PMESTQQSK_	P17106	S000003821	YJR060W	CBF1	Centromere Binding Factor	Basic helix-loop-helix (bHLH) protein; forms homodimer to bind E-box consensus sequence CACGTG present at MET gene promoters and centromere DNA element I (CDEI); affects nucleosome positioning at this motif; associates with other transcription factors such as Met4p and Isw1p to mediate transcriptional activation or repression; associates with kinetochore proteins, required for chromosome segregat…
NaN	NaN	NaN	NaN	NaN	NaN	-0.959325	0.182753	NaN	NaN	NaN	NaN	S				0.841708	90.475	48	0	0.207719	0	NaN	-0.388286	NaN	EARKKQRDQGLLSQESNDGNIDSALLSEGAT	_DQGLLSQES(ph)NDGNIDSALLSEGATLK_	P17106	S000003821	YJR060W	CBF1	Centromere Binding Factor	Basic helix-loop-helix (bHLH) protein; forms homodimer to bind E-box consensus sequence CACGTG present at MET gene promoters and centromere DNA element I (CDEI); affects nucleosome positioning at this motif; associates with other transcription factors such as Met4p and Isw1p to mediate transcriptional activation or repression; associates with kinetochore proteins, required for chromosome segregat…
0.649661	0.831715	NaN	NaN	NaN	NaN	NaN	NaN	NaN	NaN	NaN	NaN	S				0.831337	88.561	16	1.10876	0	0	0.740688	NaN	NaN	MPNNTLKQGSKIENVSPSKGHVPSFWKQFIN	_IENVS(ph)PSKGHVPSFWK_	P17121	S000002797	YDR389W	SAC7	Suppressor of ACtin	GTPase activating protein (GAP) for Rho1p; regulator of a Tor2p-mediated, Rho1p GTPase switch that controls organization of the actin cytoskeleton; negative regulator of the RHO1-PKC1-MAPK cell integrity (CWI) and membrane fluidity homeostasis signaling pathways; potential Cdc28p substrate; SAC7 has a paralog, BAG7, that arose from the whole genome duplication
1.60459	1.73127	NaN	NaN	1.32516	1.41679	NaN	NaN	NaN	NaN	-2.01396	-0.108223	S				0.990661	100.39	99	1.61684	1.6723	0.331779	1.66793	1.37097	-1.06109	SAKQNNNNNNANSGTSPHAEFKNYRDMFLSN	_QNNNNNNANSGTS(ph)PHAEFK_	P17121	S000002797	YDR389W	SAC7	Suppressor of ACtin	GTPase activating protein (GAP) for Rho1p; regulator of a Tor2p-mediated, Rho1p GTPase switch that controls organization of the actin cytoskeleton; negative regulator of the RHO1-PKC1-MAPK cell integrity (CWI) and membrane fluidity homeostasis signaling pathways; potential Cdc28p substrate; SAC7 has a paralog, BAG7, that arose from the whole genome duplication
-0.437096	-0.524064	-0.081476	-0.0938305	NaN	NaN	NaN	NaN	-0.685756	-0.57293	-1.2326	-1.0536	S				0.999965	252.05	491	1.04702	0	1.9782	-0.284117	NaN	-0.886221	SKMLKPPKQRRPHSKSFGSTPVPPDVIASNK	_S(ph)FGSTPVPPDVIASNK_	P17121	S000002797	YDR389W	SAC7	Suppressor of ACtin	GTPase activating protein (GAP) for Rho1p; regulator of a Tor2p-mediated, Rho1p GTPase switch that controls organization of the actin cytoskeleton; negative regulator of the RHO1-PKC1-MAPK cell integrity (CWI) and membrane fluidity homeostasis signaling pathways; potential Cdc28p substrate; SAC7 has a paralog, BAG7, that arose from the whole genome duplication
-0.526785	-0.668501	1.39308	0.915228	-0.189253	-0.73147	0.62271	0.462833	-0.630416	-0.887367	1.46817	0.967815	S				0.965627	179.5	37	0.202695	0.0442134	0.142855	0.278257	0.0412051	0.229551	VPSFWKQFINNPKSMSSENITVPRSPTSLSR	_SMS(ph)SENITVPRS(ph)PTSLSR_	P17121	S000002797	YDR389W	SAC7	Suppressor of ACtin	GTPase activating protein (GAP) for Rho1p; regulator of a Tor2p-mediated, Rho1p GTPase switch that controls organization of the actin cytoskeleton; negative regulator of the RHO1-PKC1-MAPK cell integrity (CWI) and membrane fluidity homeostasis signaling pathways; potential Cdc28p substrate; SAC7 has a paralog, BAG7, that arose from the whole genome duplication
0.936968	1.28588	NaN	NaN	NaN	NaN	NaN	NaN	1.04768	0.978049	-1.95084	-2.09244	S				0.983774	115.76	46	1.00385	0	0.218001	1.11142	NaN	-0.50439	NNPKSMSSENITVPRSPTSLSRNAQPTTLKR	_S(ph)MSSENITVPRS(ph)PTSLSR_	P17121	S000002797	YDR389W	SAC7	Suppressor of ACtin	GTPase activating protein (GAP) for Rho1p; regulator of a Tor2p-mediated, Rho1p GTPase switch that controls organization of the actin cytoskeleton; negative regulator of the RHO1-PKC1-MAPK cell integrity (CWI) and membrane fluidity homeostasis signaling pathways; potential Cdc28p substrate; SAC7 has a paralog, BAG7, that arose from the whole genome duplication
-1.28666	-0.940229	NaN	NaN	NaN	NaN	NaN	NaN	NaN	NaN	NaN	NaN	S				1	131.45	195	1.00767	0	0	-1.11344	NaN	NaN	VKYEDAKKELDEIAASLENL___________	_KELDEIAAS(ph)LENL_	P17536	S000005023	YNL079C	TPM1	TroPoMyosin	Major isoform of tropomyosin; binds to and stabilizes actin cables and filaments, which direct polarized cell growth and the distribution of several organelles; acetylated by the NatB complex and acetylated form binds actin most efficiently; TPM1 has a paralog, TPM2, that arose from the whole genome duplication
NaN	NaN	2.38285	0.668731	-1.01829	-1.65358	NaN	NaN	-1.67955	-2.07509	NaN	NaN	S				0.970738	135.1	91	0.487025	0.827955	1.17509	1.52579	-1.33594	-1.87732	NVPKSKALVLELDEMSNGSEIQDALEEISGQ	_ALVLELDEMS(ph)NGSEIQDALEEISGQK_	P17695	S000002921	YDR513W	GRX2	GlutaRedoXin	Cytoplasmic glutaredoxin; thioltransferase, glutathione-dependent disulfide oxidoreductase involved in maintaining redox state of target proteins, also exhibits glutathione peroxidase activity, expression induced in response to stress; GRX2 has two in-frame start codons resulting in a shorter isoform that is retained in the cytosol and a longer form translocated to the mitochondrial matrix; GRX2 …
NaN	NaN	NaN	NaN	-1.44796	-1.89518	2.08406	0.495512	NaN	NaN	NaN	NaN	S				0.871433	135.1	94	0	0.071232	0	NaN	-0.190892	NaN	KSKALVLELDEMSNGSEIQDALEEISGQKTV	_ALVLELDEMSNGS(ph)EIQDALEEISGQK_	P17695	S000002921	YDR513W	GRX2	GlutaRedoXin	Cytoplasmic glutaredoxin; thioltransferase, glutathione-dependent disulfide oxidoreductase involved in maintaining redox state of target proteins, also exhibits glutathione peroxidase activity, expression induced in response to stress; GRX2 has two in-frame start codons resulting in a shorter isoform that is retained in the cytosol and a longer form translocated to the mitochondrial matrix; GRX2 …
-0.0969155	-0.67768	0.588444	0.428585	0.192825	-0.268521	0.254307	0.441243	-0.133274	-0.606979	0.643834	0.400358	S				1	124.16	2	0.0726642	0.420761	0.0950616	0.0606085	0.154963	0.0759847	______________MSFDDLHKATERAVIQA	_(ac)S(ph)FDDLHKATER_	P17709	S000000545	YCL040W	GLK1	GLucoKinase	Glucokinase; catalyzes the phosphorylation of glucose at C6 in the first irreversible step of glucose metabolism; one of three glucose phosphorylating enzymes; expression regulated by non-fermentable carbon sources; GLK1 has a paralog, EMI2, that arose from the whole genome duplication
0.153935	0.201258	NaN	NaN	NaN	NaN	NaN	NaN	0.221568	-0.529927	0.00194893	0.0874574	S				0.971525	177.6	189	1.07407	0	0.118321	0.177596	NaN	-0.0547381	MLAKLKELAEDVDDASTGDGAAKGSKTGEGE	_LKELAEDVDDAS(ph)TGDGAAK_	P17890	S000005095	YNL151C	RPC31	RNA Polymerase C	RNA polymerase III subunit C31
0.415434	0.27739	0.914603	0.70031	-0.235484	-0.691732	1.57553	1.13625	0.317651	0.516923	0.914739	0.752437	S				1	195.1	469	1.56327	0.32794	1.75679	0.576934	0.446141	0.625437	ASNANLNSNNLMRHNSNTVTPNFRRSSRRSS	_HNS(ph)NTVTPNFR_	P18494	S000000842	YER040W	GLN3	GLutamiNe metabolism	Transcriptional activator of genes regulated by nitrogen catabolite repression; localization and activity regulated by quality of nitrogen source and Ure2p
-0.224199	-0.313997	NaN	NaN	NaN	NaN	1.84825	1.37389	NaN	NaN	NaN	NaN	S				0.889557	82.8	550	0.977777	1.03127	0	-0.269098	1.61107	NaN	SVASSPRIISSANFNSNSPLQQNLLSNSFQR	_IISSANFNS(ph)NSPLQQNLLSNS(ph)FQR_	P18494	S000000842	YER040W	GLN3	GLutamiNe metabolism	Transcriptional activator of genes regulated by nitrogen catabolite repression; localization and activity regulated by quality of nitrogen source and Ure2p
NaN	NaN	NaN	NaN	0.193204	-0.330556	0.199471	0.362993	NaN	NaN	NaN	NaN	S				0.983142	99.603	552	0	0.27425	0	NaN	0.106278	NaN	ASSPRIISSANFNSNSPLQQNLLSNSFQRQG	_IISSANFNSNS(ph)PLQQNLLSNS(ph)FQR_	P18494	S000000842	YER040W	GLN3	GLutamiNe metabolism	Transcriptional activator of genes regulated by nitrogen catabolite repression; localization and activity regulated by quality of nitrogen source and Ure2p
-0.224199	-0.313997	NaN	NaN	0.0856966	-0.384395	1.84825	1.37389	NaN	NaN	NaN	NaN	S				0.993982	99.569	562	0.977777	0.586753	0	-0.269098	0.730859	NaN	NFNSNSPLQQNLLSNSFQRQGMNIPRRKMSR	_IISSANFNS(ph)NSPLQQNLLSNS(ph)FQR_	P18494	S000000842	YER040W	GLN3	GLutamiNe metabolism	Transcriptional activator of genes regulated by nitrogen catabolite repression; localization and activity regulated by quality of nitrogen source and Ure2p
NaN	NaN	NaN	NaN	-0.32648	-0.0447318	0.821177	0.875619	NaN	NaN	NaN	NaN	S				0.999993	96.171	395	0	0.44899	0	NaN	0.331396	NaN	SVTTTNAKPIRSRKKSLQQNSLSRVIPEEII	_S(ph)LQQNSLSR_	P18494	S000000842	YER040W	GLN3	GLutamiNe metabolism	Transcriptional activator of genes regulated by nitrogen catabolite repression; localization and activity regulated by quality of nitrogen source and Ure2p
NaN	NaN	NaN	NaN	-0.343092	-0.456187	-0.347439	-1.0263	NaN	NaN	NaN	NaN	S				0.784166	217.11	687	0	1.34959	0	NaN	-0.543256	NaN	SFISNHKFNNRLSSDSTSPIKYEADVSAGGK	_LSSDS(ph)TSPIKYEADVSAGGK_	P18494	S000000842	YER040W	GLN3	GLutamiNe metabolism	Transcriptional activator of genes regulated by nitrogen catabolite repression; localization and activity regulated by quality of nitrogen source and Ure2p
-0.648033	-0.291168	NaN	NaN	-0.206995	-0.205863	NaN	NaN	NaN	NaN	NaN	NaN	S				0.946974	102.89	689	0.636073	2.75808	0	-0.4696	-0.206429	NaN	ISNHKFNNRLSSDSTSPIKYEADVSAGGKIS	_LSSDSTS(ph)PIKYEADVSAGGK_	P18494	S000000842	YER040W	GLN3	GLutamiNe metabolism	Transcriptional activator of genes regulated by nitrogen catabolite repression; localization and activity regulated by quality of nitrogen source and Ure2p
-2.48173	1.05949	NaN	NaN	NaN	NaN	NaN	NaN	NaN	NaN	NaN	NaN	S				1	76.827	46	0.120977	0	0	-0.711116	NaN	NaN	VEDEIQNKIEAARQESKQLHAQINKAKHKIQ	_IEAARQES(ph)K_	P18851	S000005738	YOR212W	STE4	STErile	G protein beta subunit; forms a dimer with Ste18p to activate the mating signaling pathway, forms a heterotrimer with Gpa1p and Ste18p to dampen signaling; may recruit Rho1p to the polarized growth site during mating; contains WD40 repeats
NaN	NaN	NaN	NaN	NaN	NaN	NaN	NaN	-0.632293	-0.80955	1.02403	0.272454	S				0.934512	129.2	188	0	0	0.0281106	NaN	NaN	-0.0363391	SSNKNKSSYGSNNDDSYGSNNDDSYGSSNKK	_SSYGSNNDDS(ph)YGSNNDDSYGSSNKKK_	P18899	S000004784	YMR173W	DDR48	DNA Damage Responsive	DNA damage-responsive protein; expression is increased in response to heat-shock stress or treatments that produce DNA lesions; contains multiple repeats of the amino acid sequence NNNDSYGS; protein abundance increases in response to DNA replication stress
NaN	NaN	NaN	NaN	-0.271931	-0.888995	NaN	NaN	-0.665661	-0.97673	NaN	NaN	S				0.994709	129.2	191	0	0.507211	0.923853	NaN	-0.580463	-0.821195	KNKSSYGSNNDDSYGSNNDDSYGSSNKKKSS	_SSYGSNNDDSYGS(ph)NNDDSYGSSNKKK_	P18899	S000004784	YMR173W	DDR48	DNA Damage Responsive	DNA damage-responsive protein; expression is increased in response to heat-shock stress or treatments that produce DNA lesions; contains multiple repeats of the amino acid sequence NNNDSYGS; protein abundance increases in response to DNA replication stress
NaN	NaN	NaN	NaN	NaN	NaN	NaN	NaN	NaN	NaN	NaN	NaN	S				0.806719	127.24	345	0	0	0	NaN	NaN	NaN	SSNKKKSSYGSSNNDSYGSNNDDSYGSSNKK	_SSYGSSNNDS(ph)YGSNNDDSYGSSNKKK_	P18899	S000004784	YMR173W	DDR48	DNA Damage Responsive	DNA damage-responsive protein; expression is increased in response to heat-shock stress or treatments that produce DNA lesions; contains multiple repeats of the amino acid sequence NNNDSYGS; protein abundance increases in response to DNA replication stress
NaN	NaN	NaN	NaN	-0.698061	-0.763342	0.684573	0.222818	-0.680683	-1.152	NaN	NaN	S				0.951387	130.57	295	0	0.141215	0.795202	NaN	-0.138503	-0.916343	NKSSYGSSSNDDSYGSSNNDDSYGSSNKKKS	_SSYGSSSNDDSYGS(ph)SNNDDSYGSSNKK_	P18899	S000004784	YMR173W	DDR48	DNA Damage Responsive	DNA damage-responsive protein; expression is increased in response to heat-shock stress or treatments that produce DNA lesions; contains multiple repeats of the amino acid sequence NNNDSYGS; protein abundance increases in response to DNA replication stress
NaN	NaN	NaN	NaN	NaN	NaN	NaN	NaN	NaN	NaN	NaN	NaN	S				0.913035	150.94	69	0	0	0	NaN	NaN	NaN	HEHHIRKINTNETLPSSLSSPKLRNDASFKN	_KINT(ph)NET(ph)LPS(ph)SLSSPK_	P18961	S000004710	YMR104C	YPK2	Yeast Protein Kinase	Protein kinase similar to serine/threonine protein kinase Ypk1p; functionally redundant with YPK1 at the genetic level; participates in a signaling pathway required for optimal cell wall integrity; homolog of mammalian kinase SGK; YPK2 has a paralog, YPK1, that arose from the whole genome duplication
0.228111	0.222681	NaN	NaN	NaN	NaN	-0.478195	-0.225028	NaN	NaN	NaN	NaN	S				0.987382	154.07	50	2.11534	0.657591	0	0.225396	-0.351612	NaN	FLKDFNTERVVEIGPSPTLAGMAQRTLKNKY	_VVEIGPS(ph)PTLAGMAQR_	P19097	S000006152	YPL231W	FAS2	Fatty Acid Synthetase	Alpha subunit of fatty acid synthetase; complex catalyzes the synthesis of long-chain saturated fatty acids; contains the acyl-carrier protein domain and beta-ketoacyl reductase, beta-ketoacyl synthase and self-pantetheinylation activities
0.0790197	0.0170667	0.00125568	0.0154909	NaN	NaN	NaN	NaN	0.157044	0.271426	-0.527371	-0.227125	S				1	105.2	1440	0.695494	0	0.16363	0.0282082	NaN	-0.0815066	ILTTAREHHSSVKYASPNLNMKYRKRQLVTR	_YAS(ph)PNLNMK_	P19097	S000006152	YPL231W	FAS2	Fatty Acid Synthetase	Alpha subunit of fatty acid synthetase; complex catalyzes the synthesis of long-chain saturated fatty acids; contains the acyl-carrier protein domain and beta-ketoacyl reductase, beta-ketoacyl synthase and self-pantetheinylation activities
NaN	NaN	-0.32458	0.0580374	NaN	NaN	NaN	NaN	NaN	NaN	NaN	NaN	S				0.945501	77.192	870	0.212793	0	0	-0.133271	NaN	NaN	GTIINEYGTKKHFKGSSPSLCSTTRSRSGST	_GS(ph)SPSLCSTTR_	P19158	S000005441	YOL081W	IRA2	Inhibitory Regulator of the RAS-cAMP pathway	GTPase-activating protein; negatively regulates RAS by converting it from the GTP- to the GDP-bound inactive form, required for reducing cAMP levels under nutrient limiting conditions; similar to human neurofibromin; IRA2 has a paralog, IRA1, that arose from the whole genome duplication
0.987976	0.97497	NaN	NaN	-0.212902	0.439783	-0.328837	0.0862163	0.843903	0.864652	-0.333309	0.296651	S				0.971883	101.32	871	2.37489	0.00737282	0.627078	0.981473	-0.00393485	0.417974	TIINEYGTKKHFKGSSPSLCSTTRSRSGSTS	_GSS(ph)PSLCSTTR_	P19158	S000005441	YOL081W	IRA2	Inhibitory Regulator of the RAS-cAMP pathway	GTPase-activating protein; negatively regulates RAS by converting it from the GTP- to the GDP-bound inactive form, required for reducing cAMP levels under nutrient limiting conditions; similar to human neurofibromin; IRA2 has a paralog, IRA1, that arose from the whole genome duplication
0.57056	0.179638	NaN	NaN	NaN	NaN	NaN	NaN	NaN	NaN	NaN	NaN	S				0.999976	175.26	924	0.514537	0	0	0.375099	NaN	NaN	SLVGSSTSRNSDNVNSLNSSPKNLSSDPYLS	_NSDNVNS(ph)LNS(ph)SPK_	P19158	S000005441	YOL081W	IRA2	Inhibitory Regulator of the RAS-cAMP pathway	GTPase-activating protein; negatively regulates RAS by converting it from the GTP- to the GDP-bound inactive form, required for reducing cAMP levels under nutrient limiting conditions; similar to human neurofibromin; IRA2 has a paralog, IRA1, that arose from the whole genome duplication
1.6532	1.71532	NaN	NaN	NaN	NaN	NaN	NaN	NaN	NaN	NaN	NaN	S				0.987535	146.2	928	1.93034	0	0	1.68426	NaN	NaN	SSTSRNSDNVNSLNSSPKNLSSDPYLSHLVA	_NSDNVNSLNSS(ph)PK_	P19158	S000005441	YOL081W	IRA2	Inhibitory Regulator of the RAS-cAMP pathway	GTPase-activating protein; negatively regulates RAS by converting it from the GTP- to the GDP-bound inactive form, required for reducing cAMP levels under nutrient limiting conditions; similar to human neurofibromin; IRA2 has a paralog, IRA1, that arose from the whole genome duplication
NaN	NaN	-1.92144	-1.59455	0.221692	-0.0053334	-0.0110662	0.320991	NaN	NaN	NaN	NaN	S				0.999623	102.87	1018	1.22901	0.673704	0	-1.75799	0.131571	NaN	FGIRSPLQKIRTRRYSDESLGKFMKSTNNYI	_RYS(ph)DESLGK_	P19158	S000005441	YOL081W	IRA2	Inhibitory Regulator of the RAS-cAMP pathway	GTPase-activating protein; negatively regulates RAS by converting it from the GTP- to the GDP-bound inactive form, required for reducing cAMP levels under nutrient limiting conditions; similar to human neurofibromin; IRA2 has a paralog, IRA1, that arose from the whole genome duplication
0.238175	0.0869197	-2.11503	-1.7729	NaN	NaN	0.296173	1.16955	NaN	NaN	-1.79693	-1.82758	S				0.991428	98.439	631	0.616025	0.465842	2.26902	-0.890709	0.732861	-1.81225	YIPDCTMHRPKERTSSFNNTAHETGSEKTSG	_TSS(ph)FNNTAHETGSEK_	P19158	S000005441	YOL081W	IRA2	Inhibitory Regulator of the RAS-cAMP pathway	GTPase-activating protein; negatively regulates RAS by converting it from the GTP- to the GDP-bound inactive form, required for reducing cAMP levels under nutrient limiting conditions; similar to human neurofibromin; IRA2 has a paralog, IRA1, that arose from the whole genome duplication
0.0903115	-0.129024	0.0981812	-0.440527	0.289126	0.0323829	0.0370143	0.341592	NaN	NaN	NaN	NaN	S				0.999297	115.63	7	0.295598	0.9148	0	-0.0952646	0.175029	NaN	_________MTTTIGSPQMLANEERLSNEMH	_(ac)TTTIGS(ph)PQMLANEER_	P19263	S000004061	YLR071C	RGR1	Resistant to Glucose Repression	Subunit of the RNA polymerase II mediator complex; associates with core polymerase subunits to form the RNA polymerase II holoenzyme; required for glucose repression, HO repression, RME1 repression and sporulation
NaN	NaN	NaN	NaN	NaN	NaN	-0.537743	-0.280838	0.546759	-0.0725586	NaN	NaN	S				1	46.415	239	0	0.713092	0.233592	NaN	-0.40929	0.2371	KILGVKLTGKMNGWTSPKDIILKLAGITTVK	_LT(ph)GKM(ox)NGWT(ph)S(ph)PKDIILK_	P19414	S000004295	YLR304C	ACO1	ACOnitase	Aconitase; required for the tricarboxylic acid (TCA) cycle and also independently required for mitochondrial genome maintenance; phosphorylated; component of the mitochondrial nucleoid; mutation leads to glutamate auxotrophy
-0.493703	-0.337685	0.148737	-0.13014	0.144177	0.217479	-0.20389	0.0721035	-0.165208	-0.0518478	-0.280838	-0.166715	S				1	172.37	1034	0.620146	0.239109	1.42059	-0.203198	0.0574673	-0.166152	PDSNIMSDSKKIKVDSPDDPFMTKSGATTSE	_IKVDS(ph)PDDPFMTK_	P19659	S000005411	YOL051W	GAL11	GALactose metabolism	Subunit of the RNA polymerase II mediator complex; associates with core polymerase subunits to form the RNA polymerase II holoenzyme; affects transcription by acting as target of activators and repressors; forms part of the tail domain of mediator
NaN	NaN	NaN	NaN	-0.118038	-0.059074	NaN	NaN	NaN	NaN	-2.034	-3.07632	S				0.780192	83.823	783	0	0.689105	0.892486	NaN	-0.088556	-2.55516	NTIPVTSIPSTNKKLSISNAASQQPTPRSAS	_KLS(ph)ISNAASQQPTPR_	P19659	S000005411	YOL051W	GAL11	GALactose metabolism	Subunit of the RNA polymerase II mediator complex; associates with core polymerase subunits to form the RNA polymerase II holoenzyme; affects transcription by acting as target of activators and repressors; forms part of the tail domain of mediator
0.858856	0.907506	NaN	NaN	NaN	NaN	NaN	NaN	NaN	NaN	NaN	NaN	S				0.792341	175	796	1.75623	0	0	0.883181	NaN	NaN	KLSISNAASQQPTPRSASNTAKSTPNTNPSP	_S(ph)ASNTAKS(ph)T(ph)PNTNPSPLK_	P19659	S000005411	YOL051W	GAL11	GALactose metabolism	Subunit of the RNA polymerase II mediator complex; associates with core polymerase subunits to form the RNA polymerase II holoenzyme; affects transcription by acting as target of activators and repressors; forms part of the tail domain of mediator
0.858856	0.907506	NaN	NaN	NaN	NaN	NaN	NaN	NaN	NaN	NaN	NaN	S				0.993888	175	803	1.75623	0	0	0.883181	NaN	NaN	ASQQPTPRSASNTAKSTPNTNPSPLKTQTKN	_S(ph)ASNTAKS(ph)T(ph)PNTNPSPLK_	P19659	S000005411	YOL051W	GAL11	GALactose metabolism	Subunit of the RNA polymerase II mediator complex; associates with core polymerase subunits to form the RNA polymerase II holoenzyme; affects transcription by acting as target of activators and repressors; forms part of the tail domain of mediator
NaN	NaN	NaN	NaN	NaN	NaN	NaN	NaN	2.67692	3.42317	0.105908	2.97506	S				0.979229	125.5	767	0	0	1.2658	NaN	NaN	2.29527	SLNKTINGKVNGRTKSNTIPVTSIPSTNKKL	_TKS(ph)NTIPVTSIPSTNKK_	P19659	S000005411	YOL051W	GAL11	GALactose metabolism	Subunit of the RNA polymerase II mediator complex; associates with core polymerase subunits to form the RNA polymerase II holoenzyme; affects transcription by acting as target of activators and repressors; forms part of the tail domain of mediator
0.906737	0.592541	NaN	NaN	NaN	NaN	0.0745018	0.362195	NaN	NaN	NaN	NaN	S				0.821276	102.98	831	0.881041	0.4308	0	0.749639	0.218348	NaN	TKNGTPNPNNMKTVQSPMGAQPSYNSAIIEN	_TVQS(ph)PMGAQPSYNSAIIENAFR_	P19659	S000005411	YOL051W	GAL11	GALactose metabolism	Subunit of the RNA polymerase II mediator complex; associates with core polymerase subunits to form the RNA polymerase II holoenzyme; affects transcription by acting as target of activators and repressors; forms part of the tail domain of mediator
1.36171	1.48836	-2.00655	-0.19862	1.3305	1.4654	-1.80571	-0.179384	1.57667	1.57163	-1.96092	-0.304044	S				1	234.38	42	0.0673417	0.0923185	0.0903776	0.161226	0.202703	0.220833	DLRVEEEIKPLDDMDSKGAVAADGEVHLRKS	_VEEEIKPLDDMDS(ph)KGAVAADGEVHLR_	P19807	S000003045	YGL077C	HNM1	Hyper-resistance to Nitrogen Mustard	Plasma membrane transporter for choline, ethanolamine, and carnitine; involved in the uptake of nitrogen mustard and the uptake of glycine betaine during hypersaline stress; co-regulated with phospholipid biosynthetic genes and negatively regulated by choline and myo-inositol
0.684101	0.877195	-0.502636	-0.174406	1.17082	1.20383	NaN	NaN	0.736821	0.738292	-0.855511	-0.0585243	S				1	98.269	545	0.256914	2.05317	0.132305	0.221063	1.18732	0.140269	EYSNNFDTIEDSREFSVAASDVELENEHVPW	_EFS(ph)VAAS(ph)DVELENEHVPWGK_	P19807	S000003045	YGL077C	HNM1	Hyper-resistance to Nitrogen Mustard	Plasma membrane transporter for choline, ethanolamine, and carnitine; involved in the uptake of nitrogen mustard and the uptake of glycine betaine during hypersaline stress; co-regulated with phospholipid biosynthetic genes and negatively regulated by choline and myo-inositol
0.668392	0.917546	NaN	NaN	0.322736	0.514097	-0.653244	0.241356	NaN	NaN	NaN	NaN	S				1	106.6	549	1.00347	0.148886	0	0.792969	0.106236	NaN	NFDTIEDSREFSVAASDVELENEHVPWGKK_	_EFS(ph)VAAS(ph)DVELENEHVPWGK_	P19807	S000003045	YGL077C	HNM1	Hyper-resistance to Nitrogen Mustard	Plasma membrane transporter for choline, ethanolamine, and carnitine; involved in the uptake of nitrogen mustard and the uptake of glycine betaine during hypersaline stress; co-regulated with phospholipid biosynthetic genes and negatively regulated by choline and myo-inositol
1.46184	1.60663	NaN	NaN	1.20546	0.951737	NaN	NaN	-0.20297	-0.338725	-2.3975	-0.108223	S				0.99675	93.179	9	1.52263	1.12765	0.588151	1.53424	1.0786	-0.761855	_______MSIRNDNASGGYMQPDQSSNASMH	_NDNAS(ph)GGYMQPDQS(ph)SNAS(ph)M(ox)HKR_	P19807	S000003045	YGL077C	HNM1	Hyper-resistance to Nitrogen Mustard	Plasma membrane transporter for choline, ethanolamine, and carnitine; involved in the uptake of nitrogen mustard and the uptake of glycine betaine during hypersaline stress; co-regulated with phospholipid biosynthetic genes and negatively regulated by choline and myo-inositol
0.421802	0.327802	NaN	NaN	NaN	NaN	-1.09896	-0.317651	0.353323	-0.25398	-2.3975	-0.108223	S				0.852597	122.01	18	1.10009	0.493673	0.399672	0.374802	-0.708305	-0.601595	IRNDNASGGYMQPDQSSNASMHKRDLRVEEE	_(ac)S(ph)IRNDNAS(ph)GGYMQPDQS(ph)SNAS(ph)MHKR_	P19807	S000003045	YGL077C	HNM1	Hyper-resistance to Nitrogen Mustard	Plasma membrane transporter for choline, ethanolamine, and carnitine; involved in the uptake of nitrogen mustard and the uptake of glycine betaine during hypersaline stress; co-regulated with phospholipid biosynthetic genes and negatively regulated by choline and myo-inositol
0.421802	0.327802	-0.212009	0.728885	1.06888	1.31075	-1.09896	-0.317651	0.353323	-0.25398	-2.3975	-0.108223	S				0.983403	138.97	19	0.689325	0.153321	0.399672	0.31662	0.240754	-0.601595	RNDNASGGYMQPDQSSNASMHKRDLRVEEEI	_NDNASGGYMQPDQSS(ph)NAS(ph)M(ox)HKR_	P19807	S000003045	YGL077C	HNM1	Hyper-resistance to Nitrogen Mustard	Plasma membrane transporter for choline, ethanolamine, and carnitine; involved in the uptake of nitrogen mustard and the uptake of glycine betaine during hypersaline stress; co-regulated with phospholipid biosynthetic genes and negatively regulated by choline and myo-inositol
0.421802	0.327802	-0.212009	0.728885	1.06888	1.31075	-0.205768	0.549578	0.353323	-0.25398	-2.3975	-0.108223	S				0.998848	138.97	22	0.689325	0.868323	0.399672	0.31662	0.680859	-0.601595	NASGGYMQPDQSSNASMHKRDLRVEEEIKPL	_NDNASGGYMQPDQSS(ph)NAS(ph)MHKR_	P19807	S000003045	YGL077C	HNM1	Hyper-resistance to Nitrogen Mustard	Plasma membrane transporter for choline, ethanolamine, and carnitine; involved in the uptake of nitrogen mustard and the uptake of glycine betaine during hypersaline stress; co-regulated with phospholipid biosynthetic genes and negatively regulated by choline and myo-inositol
NaN	NaN	NaN	NaN	1.20546	0.951737	NaN	NaN	1.25918	1.25532	-2.3975	-0.108223	S				0.995866	86.628	2	0	1.12765	0.000813169	NaN	1.0786	0.00219411	______________MSIRNDNASGGYMQPDQ	_(ac)S(ph)IRNDNAS(ph)GGYMQPDQS(ph)SNAS(ph)MHKR_	P19807	S000003045	YGL077C	HNM1	Hyper-resistance to Nitrogen Mustard	Plasma membrane transporter for choline, ethanolamine, and carnitine; involved in the uptake of nitrogen mustard and the uptake of glycine betaine during hypersaline stress; co-regulated with phospholipid biosynthetic genes and negatively regulated by choline and myo-inositol
3.11178	1.03956	NaN	NaN	1.66257	0.222434	0.607683	1.18794	NaN	NaN	NaN	NaN	S				0.999976	214.79	296	0.530555	1.20443	0	2.07567	0.920156	NaN	YMFDGTTTAKTSPSNSPEASPSLAKIDPENY	_TS(ph)PSNS(ph)PEAS(ph)PSLAK_	P19812	S000003416	YGR184C	UBR1		E3 ubiquitin ligase (N-recognin); heterodimerizes with Rad6p to ubiquitinate substrates in the N-end rule pathway; role in endoplasmic reticulum-associated protein degradation (ERAD) in the absence of canonical ER membrane ligases or after stress; major role in targeting misfolded cytosolic proteins for degradation; regulates peptide transport via Cup9p ubiquitination; mutation in human UBR1 caus…
3.11178	1.03956	NaN	NaN	1.66257	0.222434	0.607683	1.18794	NaN	NaN	NaN	NaN	S				0.999858	214.79	300	0.530555	1.20443	0	2.07567	0.920156	NaN	GTTTAKTSPSNSPEASPSLAKIDPENYTVII	_TS(ph)PSNS(ph)PEAS(ph)PSLAK_	P19812	S000003416	YGR184C	UBR1		E3 ubiquitin ligase (N-recognin); heterodimerizes with Rad6p to ubiquitinate substrates in the N-end rule pathway; role in endoplasmic reticulum-associated protein degradation (ERAD) in the absence of canonical ER membrane ligases or after stress; major role in targeting misfolded cytosolic proteins for degradation; regulates peptide transport via Cup9p ubiquitination; mutation in human UBR1 caus…
0.257614	0.165815	0.116911	0.32525	NaN	NaN	NaN	NaN	NaN	NaN	NaN	NaN	S				0.999993	144.73	528	1.7265	0	0	0.216398	NaN	NaN	EFLEDDDDDKKAANMSDDESSLIKNQLINEE	_AANM(ox)S(ph)DDESSLIK_	P19880	S000004466	YML007W	YAP1	Yeast AP-1	Basic leucine zipper (bZIP) transcription factor; required for oxidative stress tolerance; activated by H2O2 through the multistep formation of disulfide bonds and transit from the cytoplasm to the nucleus; Yap1p is degraded in the nucleus after the oxidative stress has passed; mediates resistance to cadmium; relative distribution to the nucleus increases upon DNA replication stress; YAP1 has a p…
NaN	NaN	1.31466	-0.561204	NaN	NaN	NaN	NaN	NaN	NaN	0.453004	-0.639325	S				0.99973	164.98	14	0.120989	0	0.0494182	0.376728	NaN	-0.0931602	__MSVSTAKRSLDVVSPGSLAEFEGSKSRHD	_SLDVVS(ph)PGSLAEFEGSK_	P19880	S000004466	YML007W	YAP1	Yeast AP-1	Basic leucine zipper (bZIP) transcription factor; required for oxidative stress tolerance; activated by H2O2 through the multistep formation of disulfide bonds and transit from the cytoplasm to the nucleus; Yap1p is degraded in the nucleus after the oxidative stress has passed; mediates resistance to cadmium; relative distribution to the nucleus increases upon DNA replication stress; YAP1 has a p…
-0.0867219	0.0877344	NaN	NaN	0.00388999	0.0164963	NaN	NaN	NaN	NaN	NaN	NaN	S				0.998004	51.348	499	0.00160767	0.452752	0	0.000506278	0.0101932	NaN	HEYKWHFTTSSPKAESFYQEVLPNSRKQVES	_WHFTT(ph)SSPKAES(ph)FY(ph)QEVLPNS(ph)R_	P20050	S000001334	YIL072W	HOP1	HOmolog Pairing	Meiosis-specific protein required for chromosome synapsis; displays Red1p dependent localization to the unsynapsed axial-lateral elements of the synaptonemal complex; required for chiasma formation; in vitro, displays the ability to promote intra- and intermolecular synapsis between double-stranded DNA molecules and to fold DNA into rigid protein-DNA filaments
-0.0867219	0.0877344	NaN	NaN	0.00388999	0.0164963	NaN	NaN	NaN	NaN	NaN	NaN	S				0.999277	51.348	508	0.00160767	0.452752	0	0.000506278	0.0101932	NaN	SSPKAESFYQEVLPNSRKQVESWLQDITNLR	_WHFTT(ph)SSPKAES(ph)FY(ph)QEVLPNS(ph)R_	P20050	S000001334	YIL072W	HOP1	HOmolog Pairing	Meiosis-specific protein required for chromosome synapsis; displays Red1p dependent localization to the unsynapsed axial-lateral elements of the synaptonemal complex; required for chiasma formation; in vitro, displays the ability to promote intra- and intermolecular synapsis between double-stranded DNA molecules and to fold DNA into rigid protein-DNA filaments
NaN	NaN	NaN	NaN	NaN	NaN	NaN	NaN	NaN	NaN	-3.38515	-2.90383	S				0.999885	57.238	387	0	0	1.31311	NaN	NaN	-3.14449	EFVSGDVNEDIRRRFSIIAGGSPSSSQEAFD	_RFS(ph)IIAGGSPSSSQEAFDSHGNTEHGR_	P20107	S000004856	YMR243C	ZRC1	Zinc Resistance Conferring	Vacuolar membrane zinc transporter; transports zinc from cytosol to vacuole for storage; also has role in resistance to zinc shock resulting from sudden influx of zinc into cytoplasm; human ortholog SLC30A10 functions as a Mn transporter and mutations in SLC30A10 cause neurotoxic accumulation of Mn in liver and brain; ZRC1 has a paralog, COT1, that arose from the whole genome duplication
1.12479	1.02333	2.13676	2.00538	NaN	NaN	NaN	NaN	NaN	NaN	NaN	NaN	S				0.999937	148.01	556	1.91076	0	0	1.57256	NaN	NaN	SVRDYNKPVPQNMAPSPIYPINEPTTRLYSQ	_DYNKPVPQNMAPS(ph)PIYPINEPTTR_	P20134	S000005666	YOR140W	SFL1	Suppressor gene for FLocculation	Transcriptional repressor and activator; involved in repression of flocculation-related genes, and activation of stress responsive genes; negatively regulated by cAMP-dependent protein kinase A subunit Tpk2p; premature stop codon (C1430T, Q477-stop) in SK1 background is linked to the aggressively invasive phenotype of SK1 relative to BY4741 (S288C)
NaN	NaN	-1.63538	-2.13162	-0.255012	-0.538304	0.291592	0.156997	NaN	NaN	NaN	NaN	S				0.886698	116.35	733	1.07892	0.166564	0	-1.8835	-0.0861818	NaN	TTKNTGEADNSKRKGSGVYSLLNQEDSSTSS	_KGS(ph)GVYSLLNQEDSSTSSADPK_	P20134	S000005666	YOR140W	SFL1	Suppressor gene for FLocculation	Transcriptional repressor and activator; involved in repression of flocculation-related genes, and activation of stress responsive genes; negatively regulated by cAMP-dependent protein kinase A subunit Tpk2p; premature stop codon (C1430T, Q477-stop) in SK1 background is linked to the aggressively invasive phenotype of SK1 relative to BY4741 (S288C)
-1.0211	-2.10706	-2.30419	-2.51319	-0.547257	-0.230414	0.187247	0.260878	NaN	NaN	-2.45786	-2.30012	S				0.99947	201.48	220	2.02834	0.159686	1.67578	-1.98638	-0.0823867	-2.37899	RASSRNNSSINSRKNSSNQNYDIDSGARVRP	_KNS(ph)SNQNYDIDSGAR_	P20134	S000005666	YOR140W	SFL1	Suppressor gene for FLocculation	Transcriptional repressor and activator; involved in repression of flocculation-related genes, and activation of stress responsive genes; negatively regulated by cAMP-dependent protein kinase A subunit Tpk2p; premature stop codon (C1430T, Q477-stop) in SK1 background is linked to the aggressively invasive phenotype of SK1 relative to BY4741 (S288C)
-0.523069	-1.12142	-0.103397	-0.91265	-0.568923	-0.73262	0.560111	0.427731	NaN	NaN	NaN	NaN	S				0.994107	162.29	579	1.22578	0.0813998	0	-0.665135	-0.0784252	NaN	PTTRLYSQPKMRSLGSTSSLPNDRRNSPLKL	_SLGS(ph)TS(ph)SLPNDR_	P20134	S000005666	YOR140W	SFL1	Suppressor gene for FLocculation	Transcriptional repressor and activator; involved in repression of flocculation-related genes, and activation of stress responsive genes; negatively regulated by cAMP-dependent protein kinase A subunit Tpk2p; premature stop codon (C1430T, Q477-stop) in SK1 background is linked to the aggressively invasive phenotype of SK1 relative to BY4741 (S288C)
NaN	NaN	-0.0441843	-0.143002	-0.709434	-0.799571	NaN	NaN	NaN	NaN	NaN	NaN	S				0.912353	162.29	581	0.509729	1.42042	0	-0.0935929	-0.754503	NaN	TRLYSQPKMRSLGSTSSLPNDRRNSPLKLTP	_SLGSTS(ph)SLPNDR_	P20134	S000005666	YOR140W	SFL1	Suppressor gene for FLocculation	Transcriptional repressor and activator; involved in repression of flocculation-related genes, and activation of stress responsive genes; negatively regulated by cAMP-dependent protein kinase A subunit Tpk2p; premature stop codon (C1430T, Q477-stop) in SK1 background is linked to the aggressively invasive phenotype of SK1 relative to BY4741 (S288C)
0.391328	0.457962	0.3363	-0.0123541	-0.253962	-0.263975	0.0671224	-0.337654	NaN	NaN	NaN	NaN	S				0.9515	135.02	582	1.16722	0.934328	0	0.293309	-0.197117	NaN	RLYSQPKMRSLGSTSSLPNDRRNSPLKLTPR	_SLGS(ph)TSS(ph)LPNDR_	P20134	S000005666	YOR140W	SFL1	Suppressor gene for FLocculation	Transcriptional repressor and activator; involved in repression of flocculation-related genes, and activation of stress responsive genes; negatively regulated by cAMP-dependent protein kinase A subunit Tpk2p; premature stop codon (C1430T, Q477-stop) in SK1 background is linked to the aggressively invasive phenotype of SK1 relative to BY4741 (S288C)
-0.229653	-0.111477	NaN	NaN	-0.0614056	-0.176707	0.0595099	-0.0404014	NaN	NaN	-0.0742315	-0.252416	S				1	307.04	292	0.673041	0.467609	0.497691	-0.170565	-0.0547511	-0.163324	AELQALLESKELDNRSDSEDDEDESDDE___	_ELDNRS(ph)DS(ph)EDDEDES(ph)DDE_	P20459	S000003767	YJR007W	SUI2	SUppressor of Initiator codon	Alpha subunit of the translation initiation factor eIF2; eIF2 is involved in identification of the start codon; phosphorylation of Ser51 is required for regulation of translation by inhibiting the exchange of GDP for GTP; protein abundance increases in response to DNA replication stress
-0.229653	-0.111477	NaN	NaN	-0.0614056	-0.176707	0.0595099	-0.0404014	NaN	NaN	-0.0742315	-0.252416	S				1	307.04	294	0.673041	0.467609	0.497691	-0.170565	-0.0547511	-0.163324	LQALLESKELDNRSDSEDDEDESDDE_____	_ELDNRS(ph)DS(ph)EDDEDES(ph)DDE_	P20459	S000003767	YJR007W	SUI2	SUppressor of Initiator codon	Alpha subunit of the translation initiation factor eIF2; eIF2 is involved in identification of the start codon; phosphorylation of Ser51 is required for regulation of translation by inhibiting the exchange of GDP for GTP; protein abundance increases in response to DNA replication stress
-0.229653	-0.111477	NaN	NaN	-0.0614056	-0.176707	0.0595099	-0.0404014	NaN	NaN	-0.0742315	-0.252416	S				1	307.04	301	0.673041	0.467609	0.497691	-0.170565	-0.0547511	-0.163324	KELDNRSDSEDDEDESDDE____________	_ELDNRS(ph)DSEDDEDES(ph)DDE_	P20459	S000003767	YJR007W	SUI2	SUppressor of Initiator codon	Alpha subunit of the translation initiation factor eIF2; eIF2 is involved in identification of the start codon; phosphorylation of Ser51 is required for regulation of translation by inhibiting the exchange of GDP for GTP; protein abundance increases in response to DNA replication stress
0.230695	0.160275	0.188726	0.300484	0.179001	0.40806	-0.00920381	0.0595851	0.183074	0.154194	-0.935535	0.0782133	S				0.999989	149.09	430	2.26186	0.744352	0.178866	0.220045	0.159361	-0.130013	TMKKRDAETADIGDQSEVESDTEELKKIMFG	_DAETADIGDQS(ph)EVES(ph)DTEELKK_	P20484	S000001504	YKL021C	MAK11	MAintenance of Killer	Protein involved in an early step of 60S ribosomal subunit biogenesis; essential for cell growth and replication of killer M1 dsRNA virus; contains four beta-transducin repeats
NaN	NaN	0.188726	0.300484	0.0173518	0.0539454	0.0100908	-0.00848693	0.183074	0.154194	0.0797372	0.172311	S				0.970451	149.09	434	0.844727	0.588201	2.09684	0.244605	0.0182253	0.147329	RDAETADIGDQSEVESDTEELKKIMFGEKKK	_DAETADIGDQS(ph)EVES(ph)DTEELKK_	P20484	S000001504	YKL021C	MAK11	MAintenance of Killer	Protein involved in an early step of 60S ribosomal subunit biogenesis; essential for cell growth and replication of killer M1 dsRNA virus; contains four beta-transducin repeats
4.92424	4.86483	1.30112	2.52218	1.68957	1.2734	0.123324	1.30907	5.24127	5.0347	2.49143	2.99436	S				0.999979	138.63	14	1.49358	1.32205	1.95469	3.40309	1.09884	3.94044	__MVQESRPGSVRSYSVGYQARSRSSSQRRH	_SYS(ph)VGYQAR_	P20485	S000004123	YLR133W	CKI1	Choline KInase	Choline kinase; catalyzes the first step in phosphatidylcholine synthesis via the CDP-choline (Kennedy pathway); exhibits some ethanolamine kinase activity contributing to phosphatidylethanolamine synthesis via the CDP-ethanolamine pathway; CKI1 has a paralog, EKI1, that arose from the whole genome duplication
NaN	NaN	NaN	NaN	NaN	NaN	NaN	NaN	NaN	NaN	NaN	NaN	S				0.953035	89.272	45	0	0	0	NaN	NaN	NaN	SLTRQRSSQRLIRTISIESDVSNITDDDDLR	_TIS(ph)IES(ph)DVSNITDDDDLR_	P20485	S000004123	YLR133W	CKI1	Choline KInase	Choline kinase; catalyzes the first step in phosphatidylcholine synthesis via the CDP-choline (Kennedy pathway); exhibits some ethanolamine kinase activity contributing to phosphatidylethanolamine synthesis via the CDP-ethanolamine pathway; CKI1 has a paralog, EKI1, that arose from the whole genome duplication
NaN	NaN	NaN	NaN	NaN	NaN	NaN	NaN	NaN	NaN	NaN	NaN	S				0.9896	89.272	48	0	0	0	NaN	NaN	NaN	RQRSSQRLIRTISIESDVSNITDDDDLRAVN	_TIS(ph)IES(ph)DVSNITDDDDLR_	P20485	S000004123	YLR133W	CKI1	Choline KInase	Choline kinase; catalyzes the first step in phosphatidylcholine synthesis via the CDP-choline (Kennedy pathway); exhibits some ethanolamine kinase activity contributing to phosphatidylethanolamine synthesis via the CDP-ethanolamine pathway; CKI1 has a paralog, EKI1, that arose from the whole genome duplication
NaN	NaN	NaN	NaN	NaN	NaN	NaN	NaN	NaN	NaN	NaN	NaN	S				0.976983	135.09	157	0	0	0	NaN	NaN	NaN	EAELRSALGLLNTTGSQRIEGQRPVEVFMCS	_SALGLLNTTGS(ph)QR_	P20606	S000006139	YPL218W	SAR1	Secretion-Associated, Ras-related	GTPase, GTP-binding protein of the ARF family; component of COPII coat of vesicles; required for transport vesicle formation during ER to Golgi protein transport; lowers membrane rigidity helping in vesicle formation
NaN	NaN	NaN	NaN	-0.545298	-1.12315	NaN	NaN	NaN	NaN	NaN	NaN	S				0.995371	84.249	161	0	0.673139	0	NaN	-0.834224	NaN	KSDEGGSYLCTSSTPSPIKNGSCTRQLAGKS	_SDEGGSYLCT(ph)S(ph)STPS(ph)PIKNGSCTR_	P20676	S000005624	YOR098C	NUP1	NUclear Pore	FG-nucleoporin component of central core of the nuclear pore complex; contributes directly to nucleocytoplasmic transport and maintenance of thenuclear pore complex (NPC) permeability barrier; possible karyopherin release factor that accelerates release of karyopherin-cargo complexes after transport across NPC; both NUP1 and NUP60 are homologous to human NUP153
-0.0711181	0.52085	NaN	NaN	NaN	NaN	NaN	NaN	NaN	NaN	NaN	NaN	S				0.761981	63.76	11	0.231812	0	0	0.224866	NaN	NaN	_____MSSNTSSVMSSPRVEKRSFSSTLKSF	_(ac)SSNTSS(ph)VM(ox)SS(ph)PR_	P20676	S000005624	YOR098C	NUP1	NUclear Pore	FG-nucleoporin component of central core of the nuclear pore complex; contributes directly to nucleocytoplasmic transport and maintenance of thenuclear pore complex (NPC) permeability barrier; possible karyopherin release factor that accelerates release of karyopherin-cargo complexes after transport across NPC; both NUP1 and NUP60 are homologous to human NUP153
1.0719	1.14731	-0.989866	-0.199876	NaN	NaN	-0.378068	0.916235	0.924404	0.678613	-0.663299	0.663625	S				1	97.69	80	0.184797	0.125437	0.46045	0.257366	0.269084	0.400836	LLTQELRDLDIPLVPSPKTGDGSSDKKNIDR	_DLDIPLVPS(ph)PK_	P21192	S000004121	YLR131C	ACE2	Activator of CUP1 Expression	Transcription factor required for septum destruction after cytokinesis; phosphorylation by Cbk1p blocks nuclear exit during M/G1 transition, causing localization to daughter cell nuclei, and also increases Ace2p activity; phosphorylation by Cdc28p and Pho85p prevents nuclear import during cell cycle phases other than cytokinesis; part of RAM network that regulates cellular polarity and morphogene…
NaN	NaN	-0.41846	0.336282	NaN	NaN	-1.02737	0.245557	0.453228	0.515813	NaN	NaN	S				0.848013	88.555	709	0.0310711	0.187514	1.38659	-0.041089	-0.390905	0.484521	SINKKLTSPKKSLLDSPHDTSPVKETIARDK	_SLLDS(ph)PHDTS(ph)PVKETIAR_	P21192	S000004121	YLR131C	ACE2	Activator of CUP1 Expression	Transcription factor required for septum destruction after cytokinesis; phosphorylation by Cbk1p blocks nuclear exit during M/G1 transition, causing localization to daughter cell nuclei, and also increases Ace2p activity; phosphorylation by Cdc28p and Pho85p prevents nuclear import during cell cycle phases other than cytokinesis; part of RAM network that regulates cellular polarity and morphogene…
NaN	NaN	-0.902344	0.219807	NaN	NaN	-1.02737	0.245557	0.453228	0.515813	-1.8534	1.53935	S				0.847484	88.555	714	0.185675	0.187514	0.0788184	-0.341268	-0.390905	0.163749	LTSPKKSLLDSPHDTSPVKETIARDKDGSVL	_SLLDS(ph)PHDTS(ph)PVKETIAR_	P21192	S000004121	YLR131C	ACE2	Activator of CUP1 Expression	Transcription factor required for septum destruction after cytokinesis; phosphorylation by Cbk1p blocks nuclear exit during M/G1 transition, causing localization to daughter cell nuclei, and also increases Ace2p activity; phosphorylation by Cdc28p and Pho85p prevents nuclear import during cell cycle phases other than cytokinesis; part of RAM network that regulates cellular polarity and morphogene…
1.50843	1.33851	-1.01571	0.590202	NaN	NaN	NaN	NaN	NaN	NaN	NaN	NaN	S				0.996947	169.02	303	0.431269	0	0	0.605357	NaN	NaN	PTLISPRMSNTSINGSPSRKYHRQRYPNKSP	_M(ox)SNTSINGS(ph)PSR_	P21192	S000004121	YLR131C	ACE2	Activator of CUP1 Expression	Transcription factor required for septum destruction after cytokinesis; phosphorylation by Cbk1p blocks nuclear exit during M/G1 transition, causing localization to daughter cell nuclei, and also increases Ace2p activity; phosphorylation by Cdc28p and Pho85p prevents nuclear import during cell cycle phases other than cytokinesis; part of RAM network that regulates cellular polarity and morphogene…
1.70699	1.21798	-1.50345	-0.883073	NaN	NaN	NaN	NaN	1.42535	1.60345	NaN	NaN	S				0.999997	97.163	428	0.0582343	0	1.42722	0.134611	NaN	1.5144	DDRYAAGTFTPRTQLSPIHKKRESVVSTVST	_TQLS(ph)PIHK_	P21192	S000004121	YLR131C	ACE2	Activator of CUP1 Expression	Transcription factor required for septum destruction after cytokinesis; phosphorylation by Cbk1p blocks nuclear exit during M/G1 transition, causing localization to daughter cell nuclei, and also increases Ace2p activity; phosphorylation by Cdc28p and Pho85p prevents nuclear import during cell cycle phases other than cytokinesis; part of RAM network that regulates cellular polarity and morphogene…
NaN	NaN	NaN	NaN	NaN	NaN	NaN	NaN	NaN	NaN	NaN	NaN	S				0.969408	81.346	107	0	0	0	NaN	NaN	NaN	NIDRTWNLGDENNKVSHYSKKSMSSHKRGLS	_VS(ph)HY(ph)SKKSM(ox)SS(ph)HK_	P21192	S000004121	YLR131C	ACE2	Activator of CUP1 Expression	Transcription factor required for septum destruction after cytokinesis; phosphorylation by Cbk1p blocks nuclear exit during M/G1 transition, causing localization to daughter cell nuclei, and also increases Ace2p activity; phosphorylation by Cdc28p and Pho85p prevents nuclear import during cell cycle phases other than cytokinesis; part of RAM network that regulates cellular polarity and morphogene…
NaN	NaN	NaN	NaN	NaN	NaN	NaN	NaN	NaN	NaN	NaN	NaN	S				0.999889	81.346	116	0	0	0	NaN	NaN	NaN	DENNKVSHYSKKSMSSHKRGLSGTAIFGFLG	_VS(ph)HY(ph)SKKSM(ox)SS(ph)HK_	P21192	S000004121	YLR131C	ACE2	Activator of CUP1 Expression	Transcription factor required for septum destruction after cytokinesis; phosphorylation by Cbk1p blocks nuclear exit during M/G1 transition, causing localization to daughter cell nuclei, and also increases Ace2p activity; phosphorylation by Cdc28p and Pho85p prevents nuclear import during cell cycle phases other than cytokinesis; part of RAM network that regulates cellular polarity and morphogene…
0.119688	0.148088	-0.364685	-0.230203	0.264476	0.0186342	-0.313014	-0.39605	0.297133	0.205142	-0.371392	-0.235605	S				1	175.21	52	0.246191	0.271053	0.054035	-0.0817778	-0.106488	-0.0261803	NLDDAKATLEEAEGESGVEDDAATGSSNKLK	_ATLEEAEGES(ph)GVEDDAATGSSNKLK_	P21304	S000004186	YLR196W	PWP1	Periodic tryptophan (W) Protein	Protein with WD-40 repeats involved in rRNA processing; associates with trans-acting ribosome biogenesis factors; similar to beta-transducin superfamily
1.68536	1.4298	-3.26706	-1.58386	NaN	NaN	NaN	NaN	NaN	NaN	-3.06771	-0.998701	S				1	118.31	835	0.129686	0	0.523407	-0.433938	NaN	-2.0332	QVTPKPYKNAPGDCVSPVQQKYYQNDRRNEM	_NAPGDCVS(ph)PVQQK_	P21339	S000005714	YOR188W	MSB1	Multicopy Suppressor of a Budding defect	Protein of unknown function; may be involved in positive regulation of 1,3-beta-glucan synthesis and the Pkc1p-MAPK pathway; multicopy suppressor of temperature-sensitive mutations in CDC24 and CDC42, and of mutations in BEM4; potential Cdc28p substrate; relocalizes from bud neck to cytoplasm upon DNA replication stress
-0.0950189	0.140648	-1.16781	-0.885496	-0.269564	0.163756	-0.484808	-0.422125	0.144046	-0.288065	-0.863939	-1.04096	S				1	123.08	538	0.685761	0.740836	0.807962	-0.501919	-0.253185	-0.51223	KFQAEVPQQSTVRRDSAPDNQGIYHTVISKN	_RDS(ph)APDNQGIYHTVISK_	P21339	S000005714	YOR188W	MSB1	Multicopy Suppressor of a Budding defect	Protein of unknown function; may be involved in positive regulation of 1,3-beta-glucan synthesis and the Pkc1p-MAPK pathway; multicopy suppressor of temperature-sensitive mutations in CDC24 and CDC42, and of mutations in BEM4; potential Cdc28p substrate; relocalizes from bud neck to cytoplasm upon DNA replication stress
0.971442	0.92372	-1.13027	-0.138159	1.36597	1.27501	-1.43744	-0.064469	NaN	NaN	NaN	NaN	S				1	107.82	816	0.111057	0.157681	0	0.156683	0.284767	NaN	TIPSLDSSSEASREASPAPTGSHSLTKGMAE	_EAS(ph)PAPTGSHSLTK_	P21524	S000000872	YER070W	RNR1	RiboNucleotide Reductase	Major isoform of large subunit of ribonucleotide-diphosphate reductase; the RNR complex catalyzes rate-limiting step in dNTP synthesis, regulated by DNA replication and DNA damage checkpoint pathways via localization of small subunits; relative distribution to the nucleus increases upon DNA replication stress; RNR1 has a paralog, RNR3, that arose from the whole genome duplication
NaN	NaN	NaN	NaN	NaN	NaN	NaN	NaN	NaN	NaN	NaN	NaN	S				1	203.37	887	0	0	0	NaN	NaN	NaN	VIACAIDNPEACEMCSG______________	_VIACAIDNPEACEMCS(ph)G_	P21524	S000000872	YER070W	RNR1	RiboNucleotide Reductase	Major isoform of large subunit of ribonucleotide-diphosphate reductase; the RNR complex catalyzes rate-limiting step in dNTP synthesis, regulated by DNA replication and DNA damage checkpoint pathways via localization of small subunits; relative distribution to the nucleus increases upon DNA replication stress; RNR1 has a paralog, RNR3, that arose from the whole genome duplication
-0.397847	-0.544729	1.04207	0.649322	-0.376714	-0.443183	0.472629	-0.00388999	-0.592201	-0.821483	1.009	0.525995	S				1	170.95	599	0.177957	0.152136	0.0225907	0.187204	-0.0877894	0.0303281	GFFSTKNKKKLAALESPPPVLKATGQMTERE	_LAALES(ph)PPPVLK_	P21576	S000001709	YKR001C	VPS1	Vacuolar Protein Sorting	Dynamin-like GTPase required for vacuolar sorting; also involved in actin cytoskeleton organization, endocytosis, late Golgi-retention of some proteins, regulation of peroxisome biogenesis
0.0661237	0.0980152	0.517709	0.232905	-0.0642386	0.184217	-0.30381	-0.212258	-0.177931	-0.297431	NaN	NaN	S				1	169.37	6	0.947764	0.375514	0.804682	0.228688	-0.0990225	-0.237681	__________MDPHQSPADNAASPTKSVKAT	_(ac)MDPHQS(ph)PADNAAS(ph)PTK_	P21657	S000001462	YIR023W	DAL81	Degradation of Allantoin	Positive regulator of genes in multiple nitrogen degradation pathways; contains DNA binding domain but does not appear to bind the dodecanucleotide sequence present in the promoter region of many genes involved in allantoin catabolism
0.0500489	0.0380147	NaN	NaN	0.196229	0.0776532	-0.247684	0.0296911	0.3421	-0.255357	0.290727	0.630349	S				0.995803	165.19	13	1.06318	0.0500045	0.574747	0.0440318	0.0139723	0.251955	___MDPHQSPADNAASPTKSVKATTKNSSTN	_(ac)MDPHQSPADNAAS(ph)PTK_	P21657	S000001462	YIR023W	DAL81	Degradation of Allantoin	Positive regulator of genes in multiple nitrogen degradation pathways; contains DNA binding domain but does not appear to bind the dodecanucleotide sequence present in the promoter region of many genes involved in allantoin catabolism
0.323543	0.52697	NaN	NaN	-0.487824	-0.813905	NaN	NaN	0.218223	0.339365	NaN	NaN	S				0.994905	53.998	17	0.825475	0.80616	0.865836	0.425257	-0.650864	0.278794	DPHQSPADNAASPTKSVKATTKNSSTNNNVN	_(ac)MDPHQSPADNAAS(ph)PTKS(ph)VK_	P21657	S000001462	YIR023W	DAL81	Degradation of Allantoin	Positive regulator of genes in multiple nitrogen degradation pathways; contains DNA binding domain but does not appear to bind the dodecanucleotide sequence present in the promoter region of many genes involved in allantoin catabolism
NaN	NaN	NaN	NaN	-0.624911	-0.592419	0.36264	0.0567913	NaN	NaN	NaN	NaN	S				0.861925	40.242	193	0	0.32399	0	NaN	-0.199474	NaN	KCTFSIAPNYLKRTSSGANNNMPTSSNSKRM	_TSS(ph)GANNNMPTSSNSKR_	P21657	S000001462	YIR023W	DAL81	Degradation of Allantoin	Positive regulator of genes in multiple nitrogen degradation pathways; contains DNA binding domain but does not appear to bind the dodecanucleotide sequence present in the promoter region of many genes involved in allantoin catabolism
-0.146835	-0.205979	0.0600664	-0.128029	-0.169956	-0.19024	0.324527	0.018878	-0.537759	-0.615596	0.21063	0.0812932	S				1	160.88	135	0.782665	0.0113812	0.417599	-0.105194	-0.00419755	-0.215358	TSNAKEQLKDMDADDSSDDEDGDLNELESTP	_EQLKDM(ox)DADDS(ph)S(ph)DDEDGDLNELESTPAK_	P21827	S000003065	YGL097W	SRM1	Suppressor of Receptor Mutations	Nucleotide exchange factor for Gsp1p; localizes to the nucleus, required for nucleocytoplasmic trafficking of macromolecules; suppressor of the pheromone response pathway; potentially phosphorylated by Cdc28p
-0.146835	-0.205979	0.0600664	-0.128029	-0.169956	-0.19024	0.324527	0.018878	-0.537759	-0.615596	0.21063	0.0812932	S				1	160.88	136	0.782665	0.0113812	0.417599	-0.105194	-0.00419755	-0.215358	SNAKEQLKDMDADDSSDDEDGDLNELESTPA	_EQLKDM(ox)DADDS(ph)S(ph)DDEDGDLNELESTPAK_	P21827	S000003065	YGL097W	SRM1	Suppressor of Receptor Mutations	Nucleotide exchange factor for Gsp1p; localizes to the nucleus, required for nucleocytoplasmic trafficking of macromolecules; suppressor of the pheromone response pathway; potentially phosphorylated by Cdc28p
1.95884	-0.386336	NaN	NaN	NaN	NaN	NaN	NaN	NaN	NaN	NaN	NaN	S				0.75883	92.939	27	0.204838	0	0	0.786253	NaN	NaN	QRGSEFIADDVTSNKSNNTRRMLVKEYRKIG	_GSEFIADDVTSNKS(ph)NNTR_	P21965	S000005251	YNL307C	MCK1	Meiotic and Centromere regulatory ser, tyr-Kinase	Dual-specificity ser/thr and tyrosine protein kinase; roles in chromosome segregation, meiotic entry, genome stability, phosphorylation-dependent protein degradation (Rcn1p and Cdc6p), inhibition of protein kinase A, transcriptional regulation, inhibition of RNA pol III, calcium stress and inhibition of Clb2p-Cdc28p after nuclear division; MCK1 has a paralog, YGK3, that arose from the whole genom…
NaN	NaN	0.0246046	0.138029	NaN	NaN	NaN	NaN	-0.0302214	0.0194884	0.281193	0.106094	S				0.977198	200.97	196	0.411507	0	0.580768	0.0813167	NaN	0.0941387	ICDFGSAKKLEHNQPSISYICSRFYRAPELI	_KLEHNQPS(ph)ISYICSR_	P21965	S000005251	YNL307C	MCK1	Meiotic and Centromere regulatory ser, tyr-Kinase	Dual-specificity ser/thr and tyrosine protein kinase; roles in chromosome segregation, meiotic entry, genome stability, phosphorylation-dependent protein degradation (Rcn1p and Cdc6p), inhibition of protein kinase A, transcriptional regulation, inhibition of RNA pol III, calcium stress and inhibition of Clb2p-Cdc28p after nuclear division; MCK1 has a paralog, YGK3, that arose from the whole genom…
-0.0967149	0.0251707	NaN	NaN	-0.159654	-0.115785	0.16104	-0.0268709	NaN	NaN	0.205414	-0.041243	S				0.997574	203.2	198	0.179084	0.184926	0.203326	-0.0357721	-0.0353173	0.0820853	DFGSAKKLEHNQPSISYICSRFYRAPELIIG	_KLEHNQPSIS(ph)YICSR_	P21965	S000005251	YNL307C	MCK1	Meiotic and Centromere regulatory ser, tyr-Kinase	Dual-specificity ser/thr and tyrosine protein kinase; roles in chromosome segregation, meiotic entry, genome stability, phosphorylation-dependent protein degradation (Rcn1p and Cdc6p), inhibition of protein kinase A, transcriptional regulation, inhibition of RNA pol III, calcium stress and inhibition of Clb2p-Cdc28p after nuclear division; MCK1 has a paralog, YGK3, that arose from the whole genom…
NaN	NaN	0.123953	0.691196	NaN	NaN	0.122821	0.258788	NaN	NaN	NaN	NaN	S				0.980989	96.016	356	0.412249	0.661745	0	0.407575	0.190804	NaN	LTRNAPLDSKDENFASVSPAGPSSVHNAKNG	_NAPLDSKDENFAS(ph)VSPAGPSSVHNAK_	P22082	S000005816	YOR290C	SNF2	Sucrose NonFermenting	Catalytic subunit of the SWI/SNF chromatin remodeling complex; involved in transcriptional regulation; contains DNA-stimulated ATPase activity; functions interdependently in transcriptional activation with Snf5p and Snf6p
0.0989585	0.180657	NaN	NaN	NaN	NaN	0.0483824	0.466118	0.370611	0.010923	NaN	NaN	S				0.932359	175.28	358	0.74239	0.362355	0.317636	0.139808	0.25725	0.190767	RNAPLDSKDENFASVSPAGPSSVHNAKNGTL	_NAPLDSKDENFASVS(ph)PAGPSSVHNAK_	P22082	S000005816	YOR290C	SNF2	Sucrose NonFermenting	Catalytic subunit of the SWI/SNF chromatin remodeling complex; involved in transcriptional regulation; contains DNA-stimulated ATPase activity; functions interdependently in transcriptional activation with Snf5p and Snf6p
-0.015418	0.0434844	-0.169412	-0.235727	-0.0722704	-0.169761	-0.0423643	-0.14991	-0.0377842	0.0565835	-0.0717627	-0.0641931	S				1	105.99	1375	0.613663	1.42268	0.403981	-0.0942682	-0.108576	-0.0292891	NDNMSEEQWLRQFEVSDDEKNDKQARKQRTK	_QFEVS(ph)DDEKNDKQAR_	P22082	S000005816	YOR290C	SNF2	Sucrose NonFermenting	Catalytic subunit of the SWI/SNF chromatin remodeling complex; involved in transcriptional regulation; contains DNA-stimulated ATPase activity; functions interdependently in transcriptional activation with Snf5p and Snf6p
-1.12961	-1.41454	1.85846	0.685477	NaN	NaN	NaN	NaN	NaN	NaN	NaN	NaN	S				0.909539	122.14	1500	2.11264e-05	0	0	-5.126e-05	NaN	NaN	IGGETKNSRKGEIKPSSGTNSTECQSPKSQS	_KGEIKPS(ph)SGTNSTECQS(ph)PK_	P22147	S000003141	YGL173C	XRN1	eXoRiboNuclease	Evolutionarily-conserved 5'-3' exonuclease; component of cytoplasmic processing (P) bodies involved in mRNA decay; also enters the nucleus and positively regulates transcription initiation and elongation; plays a role in microtubule-mediated processes, filamentous growth, ribosomal RNA maturation, and telomere maintenance; activated by the scavenger decapping enzyme Dcs1p
-0.948725	-0.491267	NaN	NaN	NaN	NaN	NaN	NaN	-1.28444	-1.79982	NaN	NaN	S				0.784466	116.35	1501	0.708137	0	0.977136	-0.719996	NaN	-1.54213	GGETKNSRKGEIKPSSGTNSTECQSPKSQSN	_KGEIKPSS(ph)GTNS(ph)TECQS(ph)PK_	P22147	S000003141	YGL173C	XRN1	eXoRiboNuclease	Evolutionarily-conserved 5'-3' exonuclease; component of cytoplasmic processing (P) bodies involved in mRNA decay; also enters the nucleus and positively regulates transcription initiation and elongation; plays a role in microtubule-mediated processes, filamentous growth, ribosomal RNA maturation, and telomere maintenance; activated by the scavenger decapping enzyme Dcs1p
-0.127825	-0.0526106	-0.294194	-0.244644	-0.139585	-0.534328	0.474432	0.146435	-0.496183	-0.623554	0.700451	0.0839056	S				0.852698	141.69	1505	1.33171	0.0202074	0.0967916	-0.179818	-0.0132615	-0.0838452	KNSRKGEIKPSSGTNSTECQSPKSQSNAADR	_KGEIKPSSGTNS(ph)TECQS(ph)PK_	P22147	S000003141	YGL173C	XRN1	eXoRiboNuclease	Evolutionarily-conserved 5'-3' exonuclease; component of cytoplasmic processing (P) bodies involved in mRNA decay; also enters the nucleus and positively regulates transcription initiation and elongation; plays a role in microtubule-mediated processes, filamentous growth, ribosomal RNA maturation, and telomere maintenance; activated by the scavenger decapping enzyme Dcs1p
0.309525	0.577151	-0.28889	-0.128425	0.315682	0.234501	-0.310922	-0.215119	0.198494	-0.00200671	-0.138814	0.0513244	S				0.99976	238.05	1510	0.224488	0.0124104	0.141443	0.11734	0.0060356	0.0272494	GEIKPSSGTNSTECQSPKSQSNAADRDNKKD	_KGEIKPSSGTNSTECQS(ph)PK_	P22147	S000003141	YGL173C	XRN1	eXoRiboNuclease	Evolutionarily-conserved 5'-3' exonuclease; component of cytoplasmic processing (P) bodies involved in mRNA decay; also enters the nucleus and positively regulates transcription initiation and elongation; plays a role in microtubule-mediated processes, filamentous growth, ribosomal RNA maturation, and telomere maintenance; activated by the scavenger decapping enzyme Dcs1p
1.05887	1.20132	NaN	NaN	NaN	NaN	NaN	NaN	0.934252	1.07793	NaN	NaN	S				0.889513	129.43	374	1.39718	0	1.34314	1.1301	NaN	1.00609	KMYNQLREKEINYANSMVGSPDYMALEVLEG	_EKEINYANS(ph)MVGSPDYMALEVLEGK_	P22204	S000003324	YGR092W	DBF2	DumbBell Former	Ser/Thr kinase involved in transcription and stress response; functions as part of a network of genes in exit from mitosis; localization is cell cycle regulated; activated by Cdc15p during the exit from mitosis; also plays a role in regulating the stability of SWI5 and CLB2 mRNAs; phosphorylates Chs2p to regulate primary septum formation and Hof1p to regulate cytokinesis; DBF2 has a paralog, DBF2…
NaN	NaN	0.216736	-0.44869	0.0747794	-0.784955	NaN	NaN	-0.375122	-0.950564	NaN	NaN	S				0.999771	138.97	249	0.104316	0.251451	0.583836	-0.115977	-0.355088	-0.662843	LQKASMDSNNANATQSRSISRSGSFSSQLGN	_ASM(ox)DSNNANATQS(ph)R_	P22211	S000005127	YNL183C	NPR1	Nitrogen Permease Reactivator	Protein kinase; stabilizes several plasma membrane amino acid transporters by antagonizing their ubiquitin-mediated degradation; phosphorylates Aly2p; negatively regulates Ldb19p-mediated endocytosis through phosphorylation of Ldb19p, which prevents its association with the plasma membrane; Npr1p activity is negatively regulated via phosphorylation by the TOR complex; NPR1 has a paralog, PRR2, th…
-0.338068	0.697329	0.820514	-0.098689	NaN	NaN	0.596056	0.373757	NaN	NaN	NaN	NaN	S				0.948328	101.01	45	0.380466	0.843309	0	0.270272	0.484907	NaN	TTPESQSLDLHSRNKSSSHIGSVSNSSSSDR	_NKS(ph)SSHIGSVSNSSSSDR_	P22211	S000005127	YNL183C	NPR1	Nitrogen Permease Reactivator	Protein kinase; stabilizes several plasma membrane amino acid transporters by antagonizing their ubiquitin-mediated degradation; phosphorylates Aly2p; negatively regulates Ldb19p-mediated endocytosis through phosphorylation of Ldb19p, which prevents its association with the plasma membrane; Npr1p activity is negatively regulated via phosphorylation by the TOR complex; NPR1 has a paralog, PRR2, th…
NaN	NaN	NaN	NaN	-0.338907	-0.551141	NaN	NaN	-0.35899	0.409581	NaN	NaN	S				0.845338	121.32	46	0	0.826753	0.018564	NaN	-0.445024	0.0252953	TPESQSLDLHSRNKSSSHIGSVSNSSSSDRN	_NKSS(ph)SHIGSVSNSSSSDR_	P22211	S000005127	YNL183C	NPR1	Nitrogen Permease Reactivator	Protein kinase; stabilizes several plasma membrane amino acid transporters by antagonizing their ubiquitin-mediated degradation; phosphorylates Aly2p; negatively regulates Ldb19p-mediated endocytosis through phosphorylation of Ldb19p, which prevents its association with the plasma membrane; Npr1p activity is negatively regulated via phosphorylation by the TOR complex; NPR1 has a paralog, PRR2, th…
-1.47009	-0.652811	NaN	NaN	-0.322018	0.504875	-0.606821	-0.437654	NaN	NaN	NaN	NaN	S				0.957091	97.463	317	0.63087	0.349181	0	-1.06145	-0.215405	NaN	NGSTPIPKPIRARQSSIYSASRQPTGSYTDN	_QSS(ph)IYSASR_	P22211	S000005127	YNL183C	NPR1	Nitrogen Permease Reactivator	Protein kinase; stabilizes several plasma membrane amino acid transporters by antagonizing their ubiquitin-mediated degradation; phosphorylates Aly2p; negatively regulates Ldb19p-mediated endocytosis through phosphorylation of Ldb19p, which prevents its association with the plasma membrane; Npr1p activity is negatively regulated via phosphorylation by the TOR complex; NPR1 has a paralog, PRR2, th…
-0.0788227	-0.653015	-0.282855	-0.865681	NaN	NaN	NaN	NaN	NaN	NaN	NaN	NaN	S				0.949364	57.41	260	1.11292	0	0	-0.470093	NaN	NaN	NATQSRSISRSGSFSSQLGNFFFSKNSKESS	_SGS(ph)FSS(ph)QLGNFFFSK_	P22211	S000005127	YNL183C	NPR1	Nitrogen Permease Reactivator	Protein kinase; stabilizes several plasma membrane amino acid transporters by antagonizing their ubiquitin-mediated degradation; phosphorylates Aly2p; negatively regulates Ldb19p-mediated endocytosis through phosphorylation of Ldb19p, which prevents its association with the plasma membrane; Npr1p activity is negatively regulated via phosphorylation by the TOR complex; NPR1 has a paralog, PRR2, th…
-0.935779	-1.38726	0.700544	-0.093425	-0.489747	-0.577509	0.522675	0.190898	NaN	NaN	NaN	NaN	S				0.999233	95.662	353	0.37489	0.118155	0	-0.42898	-0.0884206	NaN	SSVHDHLPPSQSVPRSQHSSIGDLKRFFKKS	_S(ph)QHSS(ph)IGDLKR_	P22211	S000005127	YNL183C	NPR1	Nitrogen Permease Reactivator	Protein kinase; stabilizes several plasma membrane amino acid transporters by antagonizing their ubiquitin-mediated degradation; phosphorylates Aly2p; negatively regulates Ldb19p-mediated endocytosis through phosphorylation of Ldb19p, which prevents its association with the plasma membrane; Npr1p activity is negatively regulated via phosphorylation by the TOR complex; NPR1 has a paralog, PRR2, th…
-0.935779	-1.38726	0.788091	0.0417289	-0.700193	-0.597802	0.737495	0.524811	NaN	NaN	NaN	NaN	S				0.987845	95.662	357	0.300596	0.00771017	0	-0.373305	-0.0089221	NaN	DHLPPSQSVPRSQHSSIGDLKRFFKKSSNSN	_S(ph)QHSS(ph)IGDLKR_	P22211	S000005127	YNL183C	NPR1	Nitrogen Permease Reactivator	Protein kinase; stabilizes several plasma membrane amino acid transporters by antagonizing their ubiquitin-mediated degradation; phosphorylates Aly2p; negatively regulates Ldb19p-mediated endocytosis through phosphorylation of Ldb19p, which prevents its association with the plasma membrane; Npr1p activity is negatively regulated via phosphorylation by the TOR complex; NPR1 has a paralog, PRR2, th…
NaN	NaN	1.09613	1.67978	NaN	NaN	0.579685	0.899534	NaN	NaN	NaN	NaN	S				0.862232	171.78	306	0.879651	0.867842	0	1.38795	0.739609	NaN	KNILTIRRKVGILPSSSTDDVTSKEGQPSLD	_VGILPSS(ph)STDDVTSK_	P22215	S000005834	YOR307C	SLY41	Suppressor of Loss of Ypt1	Protein involved in ER-to-Golgi transport
-0.457692	-0.177033	0.681932	0.693831	NaN	NaN	NaN	NaN	NaN	NaN	NaN	NaN	S				1	167.45	175	0.239928	0	0	0.185259	NaN	NaN	VDRIRSNLKNTSKIASPGLTSSTASSMVANK	_IAS(ph)PGLTSSTASSMVANK_	P22216	S000006074	YPL153C	RAD53	RADiation sensitive	DNA damage response protein kinase; required for cell-cycle arrest in response to DNA damage; activated by trans autophosphorylation when interacting with hyperphosphorylated Rad9p; also interacts with ARS1 and plays a role in initiation of DNA replication; activates the downstream kinase Dun1p; differentially senses mtDNA depletion and mitochondrial ROS; required for regulation of copper genes i…
1.75587	2.09589	-1.83512	-0.544288	1.38929	1.76706	-1.77353	-0.158596	NaN	NaN	NaN	NaN	S				1	136.81	178	0.14179	0.136501	0	0.368089	0.306056	NaN	NLNANERKFANENPNSQKTRPIFAIEQLSPY	_KFANENPNS(ph)QK_	P22336	S000000065	YAR007C	RFA1	Replication Factor A	Subunit of heterotrimeric Replication Protein A (RPA); RPA is a highly conserved single-stranded DNA binding protein involved in DNA replication, repair, and recombination; RPA protects against inappropriate telomere recombination, and upon telomere uncapping, prevents cell proliferation by a checkpoint-independent pathway; role in DNA catenation/decatenation pathway of chromosome disentangling; …
NaN	NaN	NaN	NaN	NaN	NaN	NaN	NaN	-0.08253	-0.823167	NaN	NaN	S				0.945034	88.027	367	0	0	0.36013	NaN	NaN	-0.452848	MYSLGDDGDNDIEENSLNESLLDGVTHSLDD	_LRNMYSLGDDGDNDIEENS(ph)LNESLLDGVTHSLDDLR_	P22517	S000005376	YOL016C	CMK2	CalModulin dependent protein Kinase	Calmodulin-dependent protein kinase; may play a role in stress response, many CA++/calmodulan dependent phosphorylation substrates demonstrated in vitro, amino acid sequence similar to mammalian Cam Kinase II; CMK2 has a paralog, CMK1, that arose from the whole genome duplication
0.154324	0.0772429	NaN	NaN	0.102322	0.245374	NaN	NaN	NaN	NaN	NaN	NaN	S				0.907834	37.412	209	0.689167	0.604701	0	0.115783	0.173848	NaN	SNHADANDDNNNNENSHDEDADYRPLNVKDA	_EVPAGVQPADAPDPSSNHADANDDNNNNENS(ph)HDEDADYRPLNVK_	P22579	S000005364	YOL004W	SIN3	Switch INdependent	Component of both the Rpd3S and Rpd3L histone deacetylase complexes; involved in transcriptional repression and activation of diverse processes, including mating-type switching and meiosis; involved in the maintenance of chromosomal integrity
0.11023	-0.397543	-1.01628	-0.951662	0.475396	-0.292069	-0.944709	-0.420509	NaN	NaN	NaN	NaN	S				0.999934	209.71	316	0.911972	0.411427	0	-0.563815	-0.295473	NaN	RVTTPMGTTTVNNNISPSGRGTTDAQELGSF	_VTTPMGTTTVNNNIS(ph)PSGR_	P22579	S000005364	YOL004W	SIN3	Switch INdependent	Component of both the Rpd3S and Rpd3L histone deacetylase complexes; involved in transcriptional repression and activation of diverse processes, including mating-type switching and meiosis; involved in the maintenance of chromosomal integrity
0.266037	0.42094	NaN	NaN	0.305562	0.255561	-0.168129	0.0360968	0.179129	0.204516	NaN	NaN	S				0.997736	241.71	1046	0.850204	0.401105	1.37606	0.343489	0.107273	0.191823	ESLYSHKQNVSESSGSDDGSSIASRKRPYQQ	_QNVSESSGS(ph)DDGSSIASR_	P22579	S000005364	YOL004W	SIN3	Switch INdependent	Component of both the Rpd3S and Rpd3L histone deacetylase complexes; involved in transcriptional repression and activation of diverse processes, including mating-type switching and meiosis; involved in the maintenance of chromosomal integrity
-0.422617	0.158854	NaN	NaN	NaN	NaN	NaN	NaN	NaN	NaN	NaN	NaN	S				0.978811	119.37	1483	0.137337	0	0	-0.131882	NaN	NaN	KDSIAKTSAGNQGIESETEKGKITKQEQSDN	_TSAGNQGIES(ph)ETEKGK_	P22579	S000005364	YOL004W	SIN3	Switch INdependent	Component of both the Rpd3S and Rpd3L histone deacetylase complexes; involved in transcriptional repression and activation of diverse processes, including mating-type switching and meiosis; involved in the maintenance of chromosomal integrity
-0.390396	-0.702773	NaN	NaN	NaN	NaN	0.849544	-0.256286	NaN	NaN	NaN	NaN	S				1	230.55	73	0.751551	0.163344	0	-0.546585	0.296629	NaN	DSAEKGKDNAEGQGESLADQARDYMGAAKSK	_GKDNAEGQGES(ph)LADQAR_	P22943	S000001880	YFL014W	HSP12	Heat Shock Protein	Plasma membrane protein involved in maintaining membrane organization; involved in maintaining organization during stress conditions; induced by heat shock, oxidative stress, osmostress, stationary phase, glucose depletion, oleate and alcohol; protein abundance increased in response to DNA replication stress and dietary restriction; regulated by the HOG and Ras-Pka pathways; required for dietary …
-0.897974	-0.864124	-0.549028	-0.922883	-0.345143	-0.600643	0	-0.162983	-1.08878	-0.926536	-0.58323	-0.905582	S				1	142.54	599	2.5741	0.919034	2.43254	-0.808502	-0.277192	-0.876031	ESPVKPLKITQKAINSPIIRPSSSNGVPTTS	_AINS(ph)PIIRPS(ph)SSNGVPTTSR_	P23201	S000003944	YLL021W	SPA2	Spindle Pole Antigen	Component of the polarisome; functions in actin cytoskeletal organization during polarized growth; acts as a scaffold for Mkk1p and Mpk1p cell wall integrity signaling components; potential Cdc28p substrate; coding sequence contains length polymorphisms in different strains; SPA2 has a paralog, SPH1, that arose from the whole genome duplication
1.39144	1.27566	1.9614	1.95015	NaN	NaN	0.776874	1.47754	1.20889	1.30859	NaN	NaN	S				0.786327	129.5	606	2.54907	0.717072	1.59861	1.64466	1.12721	1.25874	KITQKAINSPIIRPSSSNGVPTTSRKPSGTG	_AINS(ph)PIIRPSS(ph)SNGVPTTSR_	P23201	S000003944	YLL021W	SPA2	Spindle Pole Antigen	Component of the polarisome; functions in actin cytoskeletal organization during polarized growth; acts as a scaffold for Mkk1p and Mpk1p cell wall integrity signaling components; potential Cdc28p substrate; coding sequence contains length polymorphisms in different strains; SPA2 has a paralog, SPH1, that arose from the whole genome duplication
-0.261414	-0.163413	NaN	NaN	-0.246892	-0.283545	0.460985	0.187264	-0.537005	-0.475555	NaN	NaN	S				1	183.45	1180	0.840636	0.0555593	1.41355	-0.212414	0.0294531	-0.50628	IPVDRKAKSEAEVHTSEEDIDESNNVNGKRA	_SEAEVHT(ph)S(ph)EEDIDESNNVNGKR_	P23201	S000003944	YLL021W	SPA2	Spindle Pole Antigen	Component of the polarisome; functions in actin cytoskeletal organization during polarized growth; acts as a scaffold for Mkk1p and Mpk1p cell wall integrity signaling components; potential Cdc28p substrate; coding sequence contains length polymorphisms in different strains; SPA2 has a paralog, SPH1, that arose from the whole genome duplication
1.41262	1.49835	0.548755	1.01374	0.892508	1.26634	-0.202261	0.309645	1.17792	1.19308	0.42194	0.82309	S				0.999348	193.39	910	1.84746	0.749987	1.80478	1.11837	0.566557	0.904007	MTGKAVGPESDSRVESPGMTGQIKSLNMAGK	_AVGPESDSRVES(ph)PGMTGQIK_	P23201	S000003944	YLL021W	SPA2	Spindle Pole Antigen	Component of the polarisome; functions in actin cytoskeletal organization during polarized growth; acts as a scaffold for Mkk1p and Mpk1p cell wall integrity signaling components; potential Cdc28p substrate; coding sequence contains length polymorphisms in different strains; SPA2 has a paralog, SPH1, that arose from the whole genome duplication
-0.36589	-0.304897	2.19839	1.45791	NaN	NaN	1.46777	0.989965	0.113967	-0.133037	NaN	NaN	S				0.841402	175.93	986	0.482111	0.912786	0.0218431	0.746379	1.22887	-0.00953472	SGEVDKIESPRMVRESESLEAVGNTIPSNMT	_ES(ph)ESLEAVGNTIPSNMTVK_	P23201	S000003944	YLL021W	SPA2	Spindle Pole Antigen	Component of the polarisome; functions in actin cytoskeletal organization during polarized growth; acts as a scaffold for Mkk1p and Mpk1p cell wall integrity signaling components; potential Cdc28p substrate; coding sequence contains length polymorphisms in different strains; SPA2 has a paralog, SPH1, that arose from the whole genome duplication
NaN	NaN	-0.105544	-0.219091	NaN	NaN	NaN	NaN	NaN	NaN	NaN	NaN	S				0.999602	92.39	1263	0.669175	0	0	-0.162318	NaN	NaN	IKNTGETTAHDEKHYSDDDDSSYQFVPMKHE	_HYS(ph)DDDDSSYQFVPMK_	P23201	S000003944	YLL021W	SPA2	Spindle Pole Antigen	Component of the polarisome; functions in actin cytoskeletal organization during polarized growth; acts as a scaffold for Mkk1p and Mpk1p cell wall integrity signaling components; potential Cdc28p substrate; coding sequence contains length polymorphisms in different strains; SPA2 has a paralog, SPH1, that arose from the whole genome duplication
NaN	NaN	NaN	NaN	NaN	NaN	NaN	NaN	NaN	NaN	NaN	NaN	S				0.768822	97.579	958	0	0	0	NaN	NaN	NaN	QIKSLGMTGKITAQESIKSPEAARKLASSGE	_ITAQES(ph)IKSPEAAR_	P23201	S000003944	YLL021W	SPA2	Spindle Pole Antigen	Component of the polarisome; functions in actin cytoskeletal organization during polarized growth; acts as a scaffold for Mkk1p and Mpk1p cell wall integrity signaling components; potential Cdc28p substrate; coding sequence contains length polymorphisms in different strains; SPA2 has a paralog, SPH1, that arose from the whole genome duplication
0.94875	1.37951	NaN	NaN	NaN	NaN	NaN	NaN	1.63664	1.51738	-1.7257	-0.970559	S				0.997387	118.96	961	0.9338	0	0.044592	1.16413	NaN	0.114439	SLGMTGKITAQESIKSPEAARKLASSGEVDK	_ITAQESIKS(ph)PEAAR_	P23201	S000003944	YLL021W	SPA2	Spindle Pole Antigen	Component of the polarisome; functions in actin cytoskeletal organization during polarized growth; acts as a scaffold for Mkk1p and Mpk1p cell wall integrity signaling components; potential Cdc28p substrate; coding sequence contains length polymorphisms in different strains; SPA2 has a paralog, SPH1, that arose from the whole genome duplication
NaN	NaN	NaN	NaN	-0.142417	0.2929	1.4833	1.12076	NaN	NaN	2.88438	1.89706	S				0.979902	122.14	970	0	0.791367	0.887282	NaN	0.688637	2.39072	AQESIKSPEAARKLASSGEVDKIESPRMVRE	_KLAS(ph)SGEVDKIESPR_	P23201	S000003944	YLL021W	SPA2	Spindle Pole Antigen	Component of the polarisome; functions in actin cytoskeletal organization during polarized growth; acts as a scaffold for Mkk1p and Mpk1p cell wall integrity signaling components; potential Cdc28p substrate; coding sequence contains length polymorphisms in different strains; SPA2 has a paralog, SPH1, that arose from the whole genome duplication
1.07457	1.00094	-0.595981	0.230144	1.24999	1.4879	-0.824564	0.113036	0.946955	1.00533	-0.587845	0.252277	S				1	104.26	979	0.450766	0.382985	0.447241	0.427419	0.50659	0.404179	AARKLASSGEVDKIESPRMVRESESLEAVGN	_KLASSGEVDKIES(ph)PR_	P23201	S000003944	YLL021W	SPA2	Spindle Pole Antigen	Component of the polarisome; functions in actin cytoskeletal organization during polarized growth; acts as a scaffold for Mkk1p and Mpk1p cell wall integrity signaling components; potential Cdc28p substrate; coding sequence contains length polymorphisms in different strains; SPA2 has a paralog, SPH1, that arose from the whole genome duplication
NaN	NaN	NaN	NaN	NaN	NaN	NaN	NaN	NaN	NaN	NaN	NaN	S				1	105.22	575	0	0	0	NaN	NaN	NaN	GINMKKGFINPRKPASFLNDVEEEESPVKPL	_KPAS(ph)FLNDVEEEESPVKPLK_	P23201	S000003944	YLL021W	SPA2	Spindle Pole Antigen	Component of the polarisome; functions in actin cytoskeletal organization during polarized growth; acts as a scaffold for Mkk1p and Mpk1p cell wall integrity signaling components; potential Cdc28p substrate; coding sequence contains length polymorphisms in different strains; SPA2 has a paralog, SPH1, that arose from the whole genome duplication
0.573568	0.842536	-0.509138	-0.0540844	0.612871	0.533862	-0.965175	-0.312665	0.523763	0.77762	-0.283803	0.163171	S				1	154.84	585	0.271396	0.0288065	0.537035	0.21322	-0.0327765	0.295188	PRKPASFLNDVEEEESPVKPLKITQKAINSP	_KPASFLNDVEEEES(ph)PVKPLK_	P23201	S000003944	YLL021W	SPA2	Spindle Pole Antigen	Component of the polarisome; functions in actin cytoskeletal organization during polarized growth; acts as a scaffold for Mkk1p and Mpk1p cell wall integrity signaling components; potential Cdc28p substrate; coding sequence contains length polymorphisms in different strains; SPA2 has a paralog, SPH1, that arose from the whole genome duplication
-0.106405	-0.10053	0.288611	0.48342	0.24184	-0.209545	NaN	NaN	0.255078	-0.076037	0.220412	0.299454	S				0.998787	108.37	182	0.390567	0.0202108	0.877864	0.141274	0.0161476	0.174727	VQPSLVIPKMASIDWSSEEEEEEQVKEKPNE	_MASIDWS(ph)S(ph)EEEEEEQVKEKPNEPEGK_	P23201	S000003944	YLL021W	SPA2	Spindle Pole Antigen	Component of the polarisome; functions in actin cytoskeletal organization during polarized growth; acts as a scaffold for Mkk1p and Mpk1p cell wall integrity signaling components; potential Cdc28p substrate; coding sequence contains length polymorphisms in different strains; SPA2 has a paralog, SPH1, that arose from the whole genome duplication
-0.106405	-0.10053	0.288611	0.48342	0.24184	-0.209545	NaN	NaN	0.255078	-0.076037	0.220412	0.299454	S				0.999617	108.37	183	0.390567	0.0202108	0.877864	0.141274	0.0161476	0.174727	QPSLVIPKMASIDWSSEEEEEEQVKEKPNEP	_MASIDWS(ph)S(ph)EEEEEEQVKEKPNEPEGK_	P23201	S000003944	YLL021W	SPA2	Spindle Pole Antigen	Component of the polarisome; functions in actin cytoskeletal organization during polarized growth; acts as a scaffold for Mkk1p and Mpk1p cell wall integrity signaling components; potential Cdc28p substrate; coding sequence contains length polymorphisms in different strains; SPA2 has a paralog, SPH1, that arose from the whole genome duplication
0.348686	0.326077	0.121455	0.0774976	0.0692898	0.33674	0.47696	0.196244	0.199374	0.100036	0.140873	0.0992781	S				1	162.81	1006	1.28908	1.26128	1.97423	0.218429	0.269809	0.13489	AVGNTIPSNMTVKMESPNLKGNTVSEPQEIR	_MES(ph)PNLK_	P23201	S000003944	YLL021W	SPA2	Spindle Pole Antigen	Component of the polarisome; functions in actin cytoskeletal organization during polarized growth; acts as a scaffold for Mkk1p and Mpk1p cell wall integrity signaling components; potential Cdc28p substrate; coding sequence contains length polymorphisms in different strains; SPA2 has a paralog, SPH1, that arose from the whole genome duplication
NaN	NaN	-0.90889	-0.471344	NaN	NaN	NaN	NaN	NaN	NaN	NaN	NaN	S				0.985308	74.793	646	0.708999	0	0	-0.690117	NaN	NaN	IAKNSSHKEDNDKYVSPIKAVTSASNSASSN	_NSSHKEDNDKYVS(ph)PIK_	P23201	S000003944	YLL021W	SPA2	Spindle Pole Antigen	Component of the polarisome; functions in actin cytoskeletal organization during polarized growth; acts as a scaffold for Mkk1p and Mpk1p cell wall integrity signaling components; potential Cdc28p substrate; coding sequence contains length polymorphisms in different strains; SPA2 has a paralog, SPH1, that arose from the whole genome duplication
0.409364	1.03499	NaN	NaN	NaN	NaN	NaN	NaN	NaN	NaN	NaN	NaN	S				1	159.18	254	0.584656	0	0	0.722177	NaN	NaN	RTPTTTHKNYWDVNDSPIIKVDKDIDNEKGP	_NYWDVNDS(ph)PIIK_	P23201	S000003944	YLL021W	SPA2	Spindle Pole Antigen	Component of the polarisome; functions in actin cytoskeletal organization during polarized growth; acts as a scaffold for Mkk1p and Mpk1p cell wall integrity signaling components; potential Cdc28p substrate; coding sequence contains length polymorphisms in different strains; SPA2 has a paralog, SPH1, that arose from the whole genome duplication
0.989284	0.614663	NaN	NaN	NaN	NaN	NaN	NaN	NaN	NaN	NaN	NaN	S				0.999997	181.54	1080	0.835434	0	0	0.801974	NaN	NaN	TLKKSGLPEPNSQIVSPELAKNSPLAPIKKN	_SGLPEPNSQIVS(ph)PELAK_	P23201	S000003944	YLL021W	SPA2	Spindle Pole Antigen	Component of the polarisome; functions in actin cytoskeletal organization during polarized growth; acts as a scaffold for Mkk1p and Mpk1p cell wall integrity signaling components; potential Cdc28p substrate; coding sequence contains length polymorphisms in different strains; SPA2 has a paralog, SPH1, that arose from the whole genome duplication
NaN	NaN	NaN	NaN	NaN	NaN	NaN	NaN	1.80958	2.28732	0.873424	1.05841	S				0.998191	65.231	937	0	0	1.70744	NaN	NaN	1.50718	MAGKVVGPEADSRVESPGMKEQIKSLGMTGK	_VVGPEADSRVES(ph)PGMKEQIK_	P23201	S000003944	YLL021W	SPA2	Spindle Pole Antigen	Component of the polarisome; functions in actin cytoskeletal organization during polarized growth; acts as a scaffold for Mkk1p and Mpk1p cell wall integrity signaling components; potential Cdc28p substrate; coding sequence contains length polymorphisms in different strains; SPA2 has a paralog, SPH1, that arose from the whole genome duplication
NaN	NaN	NaN	NaN	NaN	NaN	0.764543	2.46299	1.25713	1.82049	NaN	NaN	S				0.999999	72.99	68	0	0.510901	0.938335	NaN	1.61377	1.53881	SNNNNVQNNNSGRNGSQNNDNENNIKNTLEQ	_NGS(ph)QNNDNENNIKNTLEQHR_	P23202	S000005173	YNL229C	URE2	UREidosuccinate transport	Nitrogen catabolite repression transcriptional regulator; inhibits GLN3 transcription in good nitrogen source; role in sequestering Gln3p and Gat1p to the cytoplasm; has glutathione peroxidase activity and can mutate to acquire GST activity; altered form creates [URE3] prion
-0.032492	-0.404286	NaN	NaN	NaN	NaN	-0.0298416	0.119197	-0.362232	-0.50826	NaN	NaN	S				1	112.74	318	0.347807	0.182983	0.975474	-0.218389	0.0446777	-0.435246	SKDAQDNDEEEEEGESDEEEEEGEEERRNIE	_SKDAQDNDEEEEEGES(ph)DEEEEEGEEERR_	P23255	S000000638	YCR042C	TAF2	TATA binding protein-Associated Factor	TFIID subunit (150 kDa); involved in RNA polymerase II transcription initiation
0.400319	0.0347792	0.333134	0.588856	0.711847	-0.758501	0.591745	1.68075	NaN	NaN	NaN	NaN	S				0.955926	129.12	493	1.2215	0.458226	0	0.339272	0.556461	NaN	RATGQPPSQPQAQTQSQQFGARYQPQQQPSA	_ATGQPPSQPQAQTQS(ph)QQFGAR_	P23291	S000001177	YHR135C	YCK1	Yeast Casein Kinase I homologue	Palmitoylated plasma membrane-bound casein kinase I (CK1) isoform; shares redundant functions with Yck2p in morphogenesis, proper septin assembly, endocytic trafficking, and glucose sensing; stabilized by Sod1p binding in the presence of glucose and oxygen, causing glucose repression of respiratory metabolism; YCK1 has a paralog, YCK2, that arose from the whole genome duplication
0.342896	0.144699	-0.236707	-0.131326	0.190678	0.172616	-0.113834	0.0955891	0.0962619	0.00705191	0.00977119	0.102558	S				0.999999	94.259	522	0.0782757	0.516367	0.876649	0.0298905	0.0862622	0.0539108	SAALRTPEQHPNDDNSSLAASHKGFFQKLGC	_TPEQHPNDDNS(ph)S(ph)LAAS(ph)HK_	P23291	S000001177	YHR135C	YCK1	Yeast Casein Kinase I homologue	Palmitoylated plasma membrane-bound casein kinase I (CK1) isoform; shares redundant functions with Yck2p in morphogenesis, proper septin assembly, endocytic trafficking, and glucose sensing; stabilized by Sod1p binding in the presence of glucose and oxygen, causing glucose repression of respiratory metabolism; YCK1 has a paralog, YCK2, that arose from the whole genome duplication
0.342896	0.144699	-0.236707	-0.131326	-0.0547969	-0.190388	-0.0657101	-0.0144981	0.0962619	0.00705191	0.00977119	0.102558	S				1	101.78	523	0.0782757	0.914973	0.876649	0.0298905	-0.0813483	0.0539108	AALRTPEQHPNDDNSSLAASHKGFFQKLGCC	_TPEQHPNDDNS(ph)S(ph)LAAS(ph)HK_	P23291	S000001177	YHR135C	YCK1	Yeast Casein Kinase I homologue	Palmitoylated plasma membrane-bound casein kinase I (CK1) isoform; shares redundant functions with Yck2p in morphogenesis, proper septin assembly, endocytic trafficking, and glucose sensing; stabilized by Sod1p binding in the presence of glucose and oxygen, causing glucose repression of respiratory metabolism; YCK1 has a paralog, YCK2, that arose from the whole genome duplication
0.342896	0.144699	-0.236707	-0.131326	-0.0547969	-0.190388	-0.206393	0.0753376	0.0962619	0.00705191	0.00977119	0.102558	S				1	94.259	527	0.0782757	0.604063	0.876649	0.0298905	-0.0940601	0.0539108	TPEQHPNDDNSSLAASHKGFFQKLGCC____	_TPEQHPNDDNS(ph)S(ph)LAAS(ph)HK_	P23291	S000001177	YHR135C	YCK1	Yeast Casein Kinase I homologue	Palmitoylated plasma membrane-bound casein kinase I (CK1) isoform; shares redundant functions with Yck2p in morphogenesis, proper septin assembly, endocytic trafficking, and glucose sensing; stabilized by Sod1p binding in the presence of glucose and oxygen, causing glucose repression of respiratory metabolism; YCK1 has a paralog, YCK2, that arose from the whole genome duplication
-0.449493	-0.71883	1.10945	0.240947	NaN	NaN	NaN	NaN	NaN	NaN	NaN	NaN	S				0.993247	123.14	455	0.0370386	0	0	0.0455188	NaN	NaN	QAQQQANRYQLQPDDSHYDEEREASKLDPTS	_YQLQPDDS(ph)HYDEER_	P23292	S000005098	YNL154C	YCK2	Yeast Casein Kinase	Palmitoylated plasma membrane-bound casein kinase I (CK1) isoform; shares redundant functions with Yck1p in morphogenesis, proper septin assembly, endocytic trafficking, and glucose sensing; stabilized by Sod1p binding in the presence of glucose and oxygen, causing glucose repression of respiratory metabolism; YCK2 has a paralog, YCK1, that arose from the whole genome duplication
0.203139	0.234256	0.544708	0.512925	0.16337	0.37829	-0.56881	-0.333195	0.27453	0.213876	0.608848	0.624955	S				1	159.04	417	1.59575	0.150228	1.54524	0.373757	-0.0900864	0.430552	RVPTAPRGHIVEKGESPVVKNLGAIPRGPKK	_GHIVEKGES(ph)PVVK_	P23293	S000006365	YPR161C	SGV1	Suppressor of Gpa1<sup>Val50</sup> mutation	Cyclin (Bur2p)-dependent protein kinase; part of the BUR kinase complex which functions in transcriptional regulation; phosphorylates the carboxy-terminal domain (CTD) of Rpo21p and the C-terminal repeat domain of Spt5p; recruits Spt6p to the CTD at the onset of transcription; regulated by Cak1p; similar to metazoan CDK9 proteins
-0.126423	-0.107819	0.455257	0.310057	-0.118774	-0.137203	0.0458483	0.00233905	-0.163236	-0.183277	0.149041	0.0206185	S				0.999958	112.8	2	0.362573	0.479525	0.211023	0.132768	-0.0519475	-0.0442135	______________MSDEEHTFETADAGSSA	_(ac)S(ph)DEEHTFETADAGSSATYPM(ox)QCSALRK_	P23301	S000000760	YEL034W	HYP2	HYPusine-containing protein	Translation elongation factor eIF-5A; required for translation of proteins containing polyproline stretches, including Bni1p, and this leads to a requirement for mating projection formation; structural homolog of bacterial EF-P; undergoes an essential hypusination modification; HYP2 has a paralog, ANB1, that arose from the whole genome duplication
-0.126155	-0.519756	0.366894	0.176479	-0.0516832	-0.644803	0.315558	0.336701	-0.101211	-0.577013	0.412232	0.476599	S				1	149.52	651	0.0443218	0.0156661	0.0733703	-0.0256344	-0.0110568	0.0526514	NTLAGGKKFKIARPLSVPGSPKVRSNSTVYM	_IARPLS(ph)VPGS(ph)PKVR_	P23337	S000001911	YFR015C	GSY1	Glycogen SYnthase	Glycogen synthase; expression induced by glucose limitation, nitrogen starvation, environmental stress, and entry into stationary phase; GSY1 has a paralog, GSY2, that arose from the whole genome duplication; relocalizes from nucleus to cytoplasmic foci upon DNA replication stress
-0.0676515	-0.190125	0.513873	0.345436	-0.217206	-0.0124463	0.573896	0.343019	-0.290198	-0.170459	0.914657	0.738915	S				1	149.52	655	0.362909	0.394191	0.392927	0.150383	0.171816	0.298229	GGKKFKIARPLSVPGSPKVRSNSTVYMTPGD	_IARPLS(ph)VPGS(ph)PKVR_	P23337	S000001911	YFR015C	GSY1	Glycogen SYnthase	Glycogen synthase; expression induced by glucose limitation, nitrogen starvation, environmental stress, and entry into stationary phase; GSY1 has a paralog, GSY2, that arose from the whole genome duplication; relocalizes from nucleus to cytoplasmic foci upon DNA replication stress
1.52406	1.25617	-0.424062	0.319676	NaN	NaN	NaN	NaN	NaN	NaN	-0.809085	-0.265437	S				0.987588	79.568	323	0.636321	0	0.525511	0.668961	NaN	-0.537261	FRHSARLSIAQRRPLSAESNNIGDILLKHSN	_RPLS(ph)AESNNIGDILLK_	P23561	S000004354	YLR362W	STE11	STErile	Signal transducing MEK kinase; involved in pheromone response and pseudohyphal/invasive growth pathways where it phosphorylates Ste7p, and the high osmolarity response pathway, via phosphorylation of Pbs2p; regulated by Ste20p and Ste50p; protein abundance increases in response to DNA replication stress
2.64312	2.58419	-1.7366	0.111009	NaN	NaN	-3.197	0.0211161	NaN	NaN	NaN	NaN	S				1	212.24	32	0.339586	0.297393	0	0.900429	-1.58794	NaN	SIHSTPIVQKLETDESPIQTKSEYTNAELPA	_LET(ph)DES(ph)PIQTK_	P23585	S000004613	YMR011W	HXT2	HeXose Transporter	High-affinity glucose transporter of the major facilitator superfamily; expression is induced by low levels of glucose and repressed by high levels of glucose
-0.0362596	-0.00859519	-0.114367	-0.235359	-0.0935711	0.0196308	-0.0827026	-0.580435	0.0316775	-0.137283	0.0212918	-0.102591	S				1	145.52	94	0.831749	0.578088	0.44875	-0.0986453	-0.18427	-0.0467261	RRKHKRREREEDDRLSEDDLDLLMENAGVER	_EREEDDRLS(ph)EDDLDLLMENAGVER_	P23615	S000003348	YGR116W	SPT6	SuPpressor of Ty's	Nucleosome remodeling protein; functions in various aspects of transcription, chromatin maintenance, and RNA processing; required for the maintenance of chromatin structure during transcription in order to inhibit transcription from promoters within the coding region; required for H3K36 trimethylation but not dimethylation by Set2p
-0.786149	-0.656376	NaN	NaN	-0.226172	-0.36762	-0.263996	-0.851119	-0.340313	-0.519425	0.309306	-0.170694	S				1	258.87	155	1.24323	1.2245	0.413582	-0.721262	-0.427227	-0.180281	AASRQDSTSKLEDFFSEDEEEEESGLRNGRN	_LEDFFS(ph)EDEEEEESGLR_	P23615	S000003348	YGR116W	SPT6	SuPpressor of Ty's	Nucleosome remodeling protein; functions in various aspects of transcription, chromatin maintenance, and RNA processing; required for the maintenance of chromatin structure during transcription in order to inhibit transcription from promoters within the coding region; required for H3K36 trimethylation but not dimethylation by Set2p
0.174406	0.113034	0.238204	0.247765	-0.110744	-0.0509358	0.0652042	0.0483675	-0.0150535	-0.118617	0.0431701	0.151282	S				1	298.32	134	2.06711	0.10137	0.0942289	0.193352	-0.0120272	0.0151953	FKRLKRVGDEGNAAESESDNVAASRQDSTSK	_VGDEGNAAES(ph)ES(ph)DNVAASR_	P23615	S000003348	YGR116W	SPT6	SuPpressor of Ty's	Nucleosome remodeling protein; functions in various aspects of transcription, chromatin maintenance, and RNA processing; required for the maintenance of chromatin structure during transcription in order to inhibit transcription from promoters within the coding region; required for H3K36 trimethylation but not dimethylation by Set2p
-0.75285	-0.948447	0.747052	0.249805	0.217231	0.183455	0.683599	-0.0578315	-0.839235	-1.10578	0.815859	0.00715905	S				1	278.43	136	0.159479	0.707153	0.247533	-0.17611	0.256613	-0.2805	RLKRVGDEGNAAESESDNVAASRQDSTSKLE	_VGDEGNAAES(ph)ES(ph)DNVAASR_	P23615	S000003348	YGR116W	SPT6	SuPpressor of Ty's	Nucleosome remodeling protein; functions in various aspects of transcription, chromatin maintenance, and RNA processing; required for the maintenance of chromatin structure during transcription in order to inhibit transcription from promoters within the coding region; required for H3K36 trimethylation but not dimethylation by Set2p
-0.197104	0.129876	NaN	NaN	NaN	NaN	NaN	NaN	-0.265709	-0.237422	0.0547819	-0.0597706	S				0.999803	159.36	206	0.0600269	0	0.715617	-0.0336136	NaN	-0.12703	GILDELDDFIEDDEFSDEDDETRQRRIQEKK	_TADKGGILDELDDFIEDDEFS(ph)DEDDETR_	P23615	S000003348	YGR116W	SPT6	SuPpressor of Ty's	Nucleosome remodeling protein; functions in various aspects of transcription, chromatin maintenance, and RNA processing; required for the maintenance of chromatin structure during transcription in order to inhibit transcription from promoters within the coding region; required for H3K36 trimethylation but not dimethylation by Set2p
-0.492424	-0.403714	0.511156	-0.136848	NaN	NaN	NaN	NaN	0.453122	0.526069	NaN	NaN	S				0.999946	129.2	209	0.217889	0	1.32478	-0.130457	NaN	0.489596	GATNGRTTGAQTNMESNESPRNVPIMVKPKT	_TTGAQTNM(ox)ES(ph)NES(ph)PR_	P23900	S000003966	YLL043W	FPS1	fdp1 Suppressor	Aquaglyceroporin, plasma membrane channel; involved in efflux of glycerol and xylitol, and in uptake of acetic acid and the trivalent metalloids arsenite and antimonite; role in mediating passive diffusion of glycerol is key factor in maintenance of redox balance; member of major intrinsic protein (MIP) family; phosphorylated by Hog1p MAPK under acetate stress; deletion improves xylose fermentati…
-0.492424	-0.403714	0.511156	-0.136848	-0.853293	-0.945276	NaN	NaN	0.453122	0.526069	NaN	NaN	S				1	147.1	212	0.217889	1.48771	1.32478	-0.130457	-0.899285	0.489596	NGRTTGAQTNMESNESPRNVPIMVKPKTLYQ	_TTGAQTNM(ox)ES(ph)NES(ph)PR_	P23900	S000003966	YLL043W	FPS1	fdp1 Suppressor	Aquaglyceroporin, plasma membrane channel; involved in efflux of glycerol and xylitol, and in uptake of acetic acid and the trivalent metalloids arsenite and antimonite; role in mediating passive diffusion of glycerol is key factor in maintenance of redox balance; member of major intrinsic protein (MIP) family; phosphorylated by Hog1p MAPK under acetate stress; deletion improves xylose fermentati…
NaN	NaN	NaN	NaN	NaN	NaN	NaN	NaN	NaN	NaN	-0.230326	0.16238	S				0.987516	93.768	7	0	0	0.0501558	NaN	NaN	-0.0339732	_________MKVEVDSFSGAKIYPGRGTLFV	_MKVEVDS(ph)FSGAK_	P24000	S000003380	YGR148C	RPL24B	Ribosomal Protein of the Large subunit	Ribosomal 60S subunit protein L24B; not essential for translation but may be required for normal translation rate; homologous to mammalian ribosomal protein L24, no bacterial homolog; RPL24B has a paralog, RPL24A, that arose from the whole genome duplication
-1.5149	-2.02327	-3.43709	-3.71896	NaN	NaN	NaN	NaN	NaN	NaN	-2.87454	-3.27081	S				0.981629	77.597	152	1.81092	0	1.38727	-2.67356	NaN	-3.07268	NNSNNPGSNSHRKTSSQSSIYGHSRRHSLGL	_TSS(ph)QSSIYGHSR_	P24276	S000002701	YDR293C	SSD1	Suppressor of SIT4 Deletion	Translational repressor with a role in polar growth and wall integrity; regulated by Cbk1p phosphorylation to effect bud-specific translational control and localization of specific mRNAs; interacts with TOR pathway components; contains a functional N-terminal nuclear localization sequence and nucleocytoplasmic shuttling appears to be critical to Ssd1p function
1.09572	0.87342	-1.75604	-1.39287	1.72988	1.25508	NaN	NaN	1.3376	1.00014	-3.35699	-1.74166	S				1	225.01	286	0.143729	0.998169	0.234408	-0.294942	1.49248	-0.690227	NSNWRNQSQQPQQQLSPFRHRGSNSRDYNSF	_NQSQQPQQQLS(ph)PFR_	P24276	S000002701	YDR293C	SSD1	Suppressor of SIT4 Deletion	Translational repressor with a role in polar growth and wall integrity; regulated by Cbk1p phosphorylation to effect bud-specific translational control and localization of specific mRNAs; interacts with TOR pathway components; contains a functional N-terminal nuclear localization sequence and nucleocytoplasmic shuttling appears to be critical to Ssd1p function
NaN	NaN	NaN	NaN	NaN	NaN	NaN	NaN	-0.388828	-2.00688	NaN	NaN	S				1	102.52	164	0	0	0.422317	NaN	NaN	-1.19786	KTSSQSSIYGHSRRHSLGLNEAKKAAAEEQA	_RHS(ph)LGLNEAKK_	P24276	S000002701	YDR293C	SSD1	Suppressor of SIT4 Deletion	Translational repressor with a role in polar growth and wall integrity; regulated by Cbk1p phosphorylation to effect bud-specific translational control and localization of specific mRNAs; interacts with TOR pathway components; contains a functional N-terminal nuclear localization sequence and nucleocytoplasmic shuttling appears to be critical to Ssd1p function
-1.13819	-1.34095	NaN	NaN	-0.379432	-1.08051	NaN	NaN	NaN	NaN	NaN	NaN	S				0.79805	205.78	40	1.28439	0.545141	0	-1.23957	-0.729974	NaN	GGKNAPKQIHVAHRRSQSELTNLMIEQFTLQ	_S(ph)QSELTNLMIEQFTLQK_	P24276	S000002701	YDR293C	SSD1	Suppressor of SIT4 Deletion	Translational repressor with a role in polar growth and wall integrity; regulated by Cbk1p phosphorylation to effect bud-specific translational control and localization of specific mRNAs; interacts with TOR pathway components; contains a functional N-terminal nuclear localization sequence and nucleocytoplasmic shuttling appears to be critical to Ssd1p function
-1.47157	-1.553	0.315181	-0.803227	0.859493	0.160533	NaN	NaN	NaN	NaN	NaN	NaN	S				0.8446	218.25	480	0.870148	0.417427	0	-0.878154	0.510013	NaN	SDSLSKDDLSVRRKRSSTINNDSDSLSSPTK	_S(ph)STINNDSDSLSSPTK_	P24276	S000002701	YDR293C	SSD1	Suppressor of SIT4 Deletion	Translational repressor with a role in polar growth and wall integrity; regulated by Cbk1p phosphorylation to effect bud-specific translational control and localization of specific mRNAs; interacts with TOR pathway components; contains a functional N-terminal nuclear localization sequence and nucleocytoplasmic shuttling appears to be critical to Ssd1p function
-1.47157	-1.553	NaN	NaN	NaN	NaN	0.613255	1.70172	NaN	NaN	NaN	NaN	S				0.753291	218.25	481	1.76608	0.55315	0	-1.51229	1.15749	NaN	DSLSKDDLSVRRKRSSTINNDSDSLSSPTKS	_SS(ph)TINNDSDSLSSPTK_	P24276	S000002701	YDR293C	SSD1	Suppressor of SIT4 Deletion	Translational repressor with a role in polar growth and wall integrity; regulated by Cbk1p phosphorylation to effect bud-specific translational control and localization of specific mRNAs; interacts with TOR pathway components; contains a functional N-terminal nuclear localization sequence and nucleocytoplasmic shuttling appears to be critical to Ssd1p function
0.794437	0.906583	NaN	NaN	NaN	NaN	-1.69693	-1.14012	2.24221	1.99899	0.655058	1.06915	S				0.948959	242.19	489	1.37767	0.90877	1.54225	0.85051	-1.41853	1.49135	SVRRKRSSTINNDSDSLSSPTKSGVRRRSSL	_SSTINNDSDS(ph)LSSPTK_	P24276	S000002701	YDR293C	SSD1	Suppressor of SIT4 Deletion	Translational repressor with a role in polar growth and wall integrity; regulated by Cbk1p phosphorylation to effect bud-specific translational control and localization of specific mRNAs; interacts with TOR pathway components; contains a functional N-terminal nuclear localization sequence and nucleocytoplasmic shuttling appears to be critical to Ssd1p function
0.28629	0.17645	NaN	NaN	0.756255	0.729618	-0.492827	-0.563744	1.09997	1.1604	0.655058	1.06915	S				0.935253	242.19	491	0.828664	0.102828	2.48696	0.23137	0.107325	0.996145	RRKRSSTINNDSDSLSSPTKSGVRRRSSLKQ	_SSTINNDSDSLS(ph)S(ph)PTKSGVR_	P24276	S000002701	YDR293C	SSD1	Suppressor of SIT4 Deletion	Translational repressor with a role in polar growth and wall integrity; regulated by Cbk1p phosphorylation to effect bud-specific translational control and localization of specific mRNAs; interacts with TOR pathway components; contains a functional N-terminal nuclear localization sequence and nucleocytoplasmic shuttling appears to be critical to Ssd1p function
1.00022	0.793521	0.514882	0.707689	-0.0851293	-0.0815527	-0.351855	-0.415975	0.875072	0.854714	0.947417	1.2761	S				0.99605	256.49	492	2.30781	1.11812	2.68317	0.754077	-0.233628	0.988326	RKRSSTINNDSDSLSSPTKSGVRRRSSLKQR	_SSTINNDSDSLSS(ph)PTKSGVR_	P24276	S000002701	YDR293C	SSD1	Suppressor of SIT4 Deletion	Translational repressor with a role in polar growth and wall integrity; regulated by Cbk1p phosphorylation to effect bud-specific translational control and localization of specific mRNAs; interacts with TOR pathway components; contains a functional N-terminal nuclear localization sequence and nucleocytoplasmic shuttling appears to be critical to Ssd1p function
-1.07312	-1.18794	-0.107554	-0.582267	NaN	NaN	NaN	NaN	NaN	NaN	NaN	NaN	S				0.997936	67.704	1139	1.23139	0	0	-0.73772	NaN	NaN	TFIPADEKNPKSYRNSIKNKFRSTAAEIANI	_SYRNS(ph)IK_	P24276	S000002701	YDR293C	SSD1	Suppressor of SIT4 Deletion	Translational repressor with a role in polar growth and wall integrity; regulated by Cbk1p phosphorylation to effect bud-specific translational control and localization of specific mRNAs; interacts with TOR pathway components; contains a functional N-terminal nuclear localization sequence and nucleocytoplasmic shuttling appears to be critical to Ssd1p function
NaN	NaN	NaN	NaN	NaN	NaN	NaN	NaN	1.52446	1.20758	-1.29349	0.200134	S				1	84.365	845	0	0	0.248554	NaN	NaN	0.409673	EEAELQRRLQLGLRVSPRRREHLHAPEEGSS	_LQLGLRVS(ph)PR_	P24279	S000000758	YEL032W	MCM3	MiniChromosome Maintenance	Protein involved in DNA replication; component of the Mcm2-7 hexameric helicase complex that binds chromatin as a part of the pre-replicative complex
0.489646	0.891264	-0.0231843	0.484631	0.424815	0.159371	-0.692874	-0.0363276	0.611267	0.365133	-0.286171	0.418138	S				0.990336	130.3	777	1.04128	0.0512054	0.60111	0.460589	-0.0362539	0.277091	PQKSPKKRQRVRQPASNSGSPIKSTPRRSTA	_VRQPAS(ph)NS(ph)GSPIKSTPR_	P24279	S000000758	YEL032W	MCM3	MiniChromosome Maintenance	Protein involved in DNA replication; component of the Mcm2-7 hexameric helicase complex that binds chromatin as a part of the pre-replicative complex
0.135666	0.839476	NaN	NaN	0.389236	0.246712	-0.692874	-0.0363276	0.660929	0.234992	-1.77429	-0.975263	S				0.855899	130.3	779	0.400118	0.0320953	0.330718	0.487571	-0.0233132	-0.463409	KSPKKRQRVRQPASNSGSPIKSTPRRSTASS	_VRQPASNS(ph)GS(ph)PIKST(ph)PR_	P24279	S000000758	YEL032W	MCM3	MiniChromosome Maintenance	Protein involved in DNA replication; component of the Mcm2-7 hexameric helicase complex that binds chromatin as a part of the pre-replicative complex
0.843582	0.943059	-0.0231843	0.484631	0.406972	0.203139	-0.692874	-0.0363276	0.433066	0.365133	-0.286171	0.418138	S				0.982848	108.75	781	1.08439	0.0415824	0.564389	0.562022	-0.0297727	0.232541	PKKRQRVRQPASNSGSPIKSTPRRSTASSVN	_VRQPASNS(ph)GS(ph)PIKSTPR_	P24279	S000000758	YEL032W	MCM3	MiniChromosome Maintenance	Protein involved in DNA replication; component of the Mcm2-7 hexameric helicase complex that binds chromatin as a part of the pre-replicative complex
0.668119	0.709644	NaN	NaN	0.725785	0.42825	-1.35236	-0.164143	0.611267	0.835924	-1.77429	-0.975263	S				0.876813	99.923	785	1.71712	0.0673976	0.193507	0.688881	-0.0906178	-0.325591	QRVRQPASNSGSPIKSTPRRSTASSVNATPS	_VRQPAS(ph)NSGSPIKS(ph)TPR_	P24279	S000000758	YEL032W	MCM3	MiniChromosome Maintenance	Protein involved in DNA replication; component of the Mcm2-7 hexameric helicase complex that binds chromatin as a part of the pre-replicative complex
NaN	NaN	0.236333	0.179123	NaN	NaN	NaN	NaN	0.149129	0.587269	NaN	NaN	S				1	91.337	75	1.05989	0	0.466374	0.207728	NaN	0.368199	KLRLKTAQQSQGENGSEDNERCNSKEYGFLS	_LKTAQQSQGENGS(ph)EDNER_	P24583	S000000201	YBL105C	PKC1	Protein Kinase C	Protein serine/threonine kinase; essential for cell wall remodeling during growth; localized to sites of polarized growth and the mother-daughter bud neck; homolog of the alpha, beta, and gamma isoforms of mammalian protein kinase C (PKC)
0.000288558	-0.122743	0.136093	-0.136323	0.0129261	-0.0164974	-0.584	-0.228234	-0.395207	-0.546098	0.650816	0.515728	S				0.998121	147.12	90	0.179001	0.629124	0.0623909	-0.0306709	-0.203951	0.0563096	KNFYVEHESVRDRSDSEIAQFRKENEMTISG	_DRSDS(ph)EIAQFR_	P24783	S000005056	YNL112W	DBP2	Dead Box Protein	ATP-dependent RNA helicase of the DEAD-box protein family; has a strong preference for dsRNA; interacts with YRA1; required for the assembly of Yra1p, Nab2p and Mex67p onto mRNA and formation of nuclear mRNP; involved in mRNA decay and rRNA processing; may be involved in suppression of transcription from cryptic initiation sites
NaN	NaN	-1.4984	-1.05769	NaN	NaN	NaN	NaN	NaN	NaN	-1.47654	-0.721504	S				0.999674	81.709	199	0.963792	0	0.676456	-1.27805	NaN	-1.09902	IELDNLKLKELRIDNSPQAISYLHKLQRMRL	_IDNS(ph)PQAISYLHK_	P24814	S000003850	YJR090C	GRR1	Glucose Repression-Resistant	F-box protein component of an SCF ubiquitin-ligase complex; modular substrate specificity factor which associates with core SCF (Cdc53p, Skp1p and Hrt1p/Rbx1p) to form the SCF(Grr1) complex; SCF(Grr1) acts as a ubiquitin-protein ligase directing ubiquitination of substrates such as: Gic2p, Mks1p, Mth1p, Cln1p, Cln2p and Cln3p; involved in carbon catabolite repression, glucose-dependent divalent c…
NaN	NaN	NaN	NaN	0.0650208	-0.134065	0.0120243	0.230516	0.325962	-0.0277926	0.0951576	-0.103263	S				1	197.73	530	0	0.218412	0.304492	NaN	0.0433739	0.0725161	ARLPMSKKEKAAQQDSSEDENIGGEYYTKLH	_EKAAQQDS(ph)S(ph)EDENIGGEYYTK_	P25037	S000002280	YDL122W	UBP1	UBiquitin-specific Protease	Ubiquitin-specific protease; removes ubiquitin from ubiquitinated proteins; cleaves at the C terminus of ubiquitin fusions irrespective of their size; capable of cleaving polyubiquitin chains
NaN	NaN	NaN	NaN	0.0650208	-0.134065	0.0120243	0.230516	0.325962	-0.0277926	0.0951576	-0.103263	S				1	197.73	531	0	0.218412	0.304492	NaN	0.0433739	0.0725161	RLPMSKKEKAAQQDSSEDENIGGEYYTKLHE	_EKAAQQDS(ph)S(ph)EDENIGGEYYTK_	P25037	S000002280	YDL122W	UBP1	UBiquitin-specific Protease	Ubiquitin-specific protease; removes ubiquitin from ubiquitinated proteins; cleaves at the C terminus of ubiquitin fusions irrespective of their size; capable of cleaving polyubiquitin chains
0.0701146	0.0507454	NaN	NaN	NaN	NaN	NaN	NaN	0.0882773	0.576474	NaN	NaN	S				0.820708	45.126	555	0.99497	0	0.394411	0.06043	NaN	0.332375	YYTKLHERFEQEFEDSEEEKEYDDAEGNYAS	_FEQEFEDS(ph)EEEKEYDDAEGNYASHYNHTK_	P25037	S000002280	YDL122W	UBP1	UBiquitin-specific Protease	Ubiquitin-specific protease; removes ubiquitin from ubiquitinated proteins; cleaves at the C terminus of ubiquitin fusions irrespective of their size; capable of cleaving polyubiquitin chains
-0.189335	0.0214797	0.415672	0.124566	-0.464684	-0.181771	0.155872	0.234924	NaN	NaN	NaN	NaN	S				0.999832	52.707	618	0.289909	0.143644	0	0.0930958	-0.0639149	NaN	TDALGNTIKKRIIEHSDVENENVKDNEELQE	_IIEHS(ph)DVENENVKDNEELQEIDNVSLDEPK_	P25037	S000002280	YDL122W	UBP1	UBiquitin-specific Protease	Ubiquitin-specific protease; removes ubiquitin from ubiquitinated proteins; cleaves at the C terminus of ubiquitin fusions irrespective of their size; capable of cleaving polyubiquitin chains
0.213752	0.235482	NaN	NaN	0.390338	0.385376	-0.609377	-0.555423	NaN	NaN	NaN	NaN	S				0.999955	60.139	638	1.51187	0.124074	0	0.224617	-0.0972717	NaN	ENVKDNEELQEIDNVSLDEPKINVEDQLETS	_IIEHSDVENENVKDNEELQEIDNVS(ph)LDEPK_	P25037	S000002280	YDL122W	UBP1	UBiquitin-specific Protease	Ubiquitin-specific protease; removes ubiquitin from ubiquitinated proteins; cleaves at the C terminus of ubiquitin fusions irrespective of their size; capable of cleaving polyubiquitin chains
-0.871839	-0.768052	0.544224	0.0216872	-0.546878	-0.634016	0.749499	-0.033793	NaN	NaN	NaN	NaN	S				1	157.14	755	0.315896	0.131665	0	-0.268495	-0.116297	NaN	DEETGKMKDDLEAIQSNNEEDDEKEQEQKGV	_MKDDLEAIQS(ph)NNEEDDEKEQEQK_	P25037	S000002280	YDL122W	UBP1	UBiquitin-specific Protease	Ubiquitin-specific protease; removes ubiquitin from ubiquitinated proteins; cleaves at the C terminus of ubiquitin fusions irrespective of their size; capable of cleaving polyubiquitin chains
-0.482734	-0.410045	NaN	NaN	NaN	NaN	NaN	NaN	NaN	NaN	NaN	NaN	S				0.898103	48.616	200	1.28635	0	0	-0.44639	NaN	NaN	NSGNNSKKRKNKSSGSSMATPTHSDSHEDMK	_SSGS(ph)SM(ox)AT(ph)PTHSDSHEDM(ox)K_	P25046	S000000189	YBL093C	ROX3	Repressor Of hypoXic genes	Subunit of the RNA polymerase II mediator complex; associates with core polymerase subunits to form the RNA polymerase II holoenzyme
0.592636	-0.212116	NaN	NaN	NaN	NaN	NaN	NaN	0.607579	-0.0378878	NaN	NaN	S				0.961986	178.56	375	0.143383	0	0.26789	0.19026	NaN	0.284846	MMLFVARKPENAETPSQTSQEATQ_______	_KPENAETPS(ph)QT(ph)SQEATQ_	P25087	S000004467	YML008C	ERG6	ERGosterol biosynthesis	Delta(24)-sterol C-methyltransferase; converts zymosterol to fecosterol in the ergosterol biosynthetic pathway by methylating position C-24; localized to lipid particles, the plasma membrane-associated endoplasmic reticulum, and the mitochondrial outer membrane
0.155749	0.186627	NaN	NaN	0.0553346	-0.0569864	0.133844	-0.0862402	-0.0726951	0.12618	0.253017	0.331554	S				0.990251	222.91	378	1.24215	0.077767	0.773992	0.171188	0.0114879	0.159514	FVARKPENAETPSQTSQEATQ__________	_KPENAETPSQTS(ph)QEATQ_	P25087	S000004467	YML008C	ERG6	ERGosterol biosynthesis	Delta(24)-sterol C-methyltransferase; converts zymosterol to fecosterol in the ergosterol biosynthetic pathway by methylating position C-24; localized to lipid particles, the plasma membrane-associated endoplasmic reticulum, and the mitochondrial outer membrane
NaN	NaN	0.733531	0.123073	-0.836012	-1.14979	0.760724	0.285442	NaN	NaN	NaN	NaN	S				0.999998	86.32	177	0.404313	0.193991	0	0.428302	-0.234909	NaN	ETELLVDEEEKAQNDSEEEQVKGIPSFWLTA	_GQEIVESLNETELLVDEEEKAQNDS(ph)EEEQVK_	P25293	S000001756	YKR048C	NAP1	Nucleosome Assembly Protein	Histone chaperone; involved in histone exchange by removing and replacing histone H2A-H2B dimers or histone variant dimers from assembled nucleosomes; involved in the transport of H2A and H2B histones to the nucleus; required for the regulation of microtubule dynamics during mitosis; interacts with mitotic cyclin Clb2p; controls bud morphogenesis; phosphorylated by CK2; protein abundance increase…
0.182438	0.0958569	-0.354565	-0.0387171	NaN	NaN	NaN	NaN	0.484396	-0.106948	0.0225516	0.385186	S				1	64.104	140	0.0846679	0	0.585195	-0.0287468	NaN	0.196296	LQKYKPIWEQRSRIISGQEQPKPEQIAKGQE	_IIS(ph)GQEQPKPEQIAK_	P25293	S000001756	YKR048C	NAP1	Nucleosome Assembly Protein	Histone chaperone; involved in histone exchange by removing and replacing histone H2A-H2B dimers or histone variant dimers from assembled nucleosomes; involved in the transport of H2A and H2B histones to the nucleus; required for the regulation of microtubule dynamics during mitosis; interacts with mitotic cyclin Clb2p; controls bud morphogenesis; phosphorylated by CK2; protein abundance increase…
-0.464186	-0.510252	NaN	NaN	-0.130997	-0.438835	0.112833	0.0468168	NaN	NaN	-1.30305	-1.13527	S				1	190.67	76	1.52182	0.330885	1.35916	-0.487219	-0.102546	-1.21916	ANQPLLLQSIQDRLGSLVGQDSGYVGGLPKN	_LGS(ph)LVGQDSGYVGGLPK_	P25293	S000001756	YKR048C	NAP1	Nucleosome Assembly Protein	Histone chaperone; involved in histone exchange by removing and replacing histone H2A-H2B dimers or histone variant dimers from assembled nucleosomes; involved in the transport of H2A and H2B histones to the nucleus; required for the regulation of microtubule dynamics during mitosis; interacts with mitotic cyclin Clb2p; controls bud morphogenesis; phosphorylated by CK2; protein abundance increase…
-0.293076	0.247563	NaN	NaN	NaN	NaN	NaN	NaN	NaN	NaN	NaN	NaN	S				0.778874	85.855	82	0.0238643	0	0	-0.0227566	NaN	NaN	LQSIQDRLGSLVGQDSGYVGGLPKNVKEKLL	_LGSLVGQDS(ph)GYVGGLPK_	P25293	S000001756	YKR048C	NAP1	Nucleosome Assembly Protein	Histone chaperone; involved in histone exchange by removing and replacing histone H2A-H2B dimers or histone variant dimers from assembled nucleosomes; involved in the transport of H2A and H2B histones to the nucleus; required for the regulation of microtubule dynamics during mitosis; interacts with mitotic cyclin Clb2p; controls bud morphogenesis; phosphorylated by CK2; protein abundance increase…
0.541812	0.236829	NaN	NaN	NaN	NaN	NaN	NaN	1.11995	0.80364	NaN	NaN	S				0.925024	84.166	27	0.62404	0	0.983985	0.389321	NaN	0.961797	SMQIDNAPTPHNTPASVLNPSYLKNGNPVRA	_SSMQIDNAPTPHNTPAS(ph)VLNPSYLK_	P25293	S000001756	YKR048C	NAP1	Nucleosome Assembly Protein	Histone chaperone; involved in histone exchange by removing and replacing histone H2A-H2B dimers or histone variant dimers from assembled nucleosomes; involved in the transport of H2A and H2B histones to the nucleus; required for the regulation of microtubule dynamics during mitosis; interacts with mitotic cyclin Clb2p; controls bud morphogenesis; phosphorylated by CK2; protein abundance increase…
1.50711	1.22045	-1.44324	-0.450169	NaN	NaN	NaN	NaN	NaN	NaN	NaN	NaN	S				1	164.88	806	0.105087	0	0	0.20854	NaN	NaN	VIKDIKSTPSKILENSPILYRRRSQSISDEK	_ILENS(ph)PILYR_	P25302	S000000913	YER111C	SWI4	SWItching deficient	DNA binding component of the SBF complex (Swi4p-Swi6p); a transcriptional activator that in concert with MBF (Mbp1-Swi6p) regulates late G1-specific transcription of targets including cyclins and genes required for DNA synthesis and repair; Slt2p-independent regulator of cold growth; acetylation at two sites, K1016 and K1066, regulates interaction with Swi6p
1.15562	1.4409	NaN	NaN	NaN	NaN	-0.706641	-0.556012	NaN	NaN	NaN	NaN	S				0.999924	61.096	860	1.15698	1.12154	0	1.29826	-0.631327	NaN	MPSLESPSSLLPIQMSPLGKYSKPLSQQINK	_TAMPSLESPSS(ph)LLPIQMS(ph)PLGK_	P25302	S000000913	YER111C	SWI4	SWItching deficient	DNA binding component of the SBF complex (Swi4p-Swi6p); a transcriptional activator that in concert with MBF (Mbp1-Swi6p) regulates late G1-specific transcription of targets including cyclins and genes required for DNA synthesis and repair; Slt2p-independent regulator of cold growth; acetylation at two sites, K1016 and K1066, regulates interaction with Swi6p
1.05235	0.413594	-0.0408223	0.831923	NaN	NaN	0.0848998	0.786671	NaN	NaN	NaN	NaN	S				1	55.051	203	0.994109	0.36496	0	0.56426	0.435786	NaN	TPSSPSYIAKDSRNLSNGSLNDINENEELQN	_NLS(ph)NGS(ph)LNDINENEELQNFHR_	P25341	S000000687	YCR091W	KIN82	protein KINase	Putative serine/threonine protein kinase; implicated in the regulation of phospholipid asymmetry through the activation of phospholipid translocases (flippases) Lem3p-Dnf1p/Dnf2p; KIN82 has a paralog, FPK1, that arose from the whole genome duplication
1.05235	0.413594	-0.0408223	0.831923	NaN	NaN	0.0848998	0.786671	NaN	NaN	NaN	NaN	S				1	55.051	206	0.994109	0.36496	0	0.56426	0.435786	NaN	SPSYIAKDSRNLSNGSLNDINENEELQNFHR	_NLS(ph)NGS(ph)LNDINENEELQNFHR_	P25341	S000000687	YCR091W	KIN82	protein KINase	Putative serine/threonine protein kinase; implicated in the regulation of phospholipid asymmetry through the activation of phospholipid translocases (flippases) Lem3p-Dnf1p/Dnf2p; KIN82 has a paralog, FPK1, that arose from the whole genome duplication
1.14411	0.466131	NaN	NaN	NaN	NaN	NaN	NaN	NaN	NaN	NaN	NaN	S				0.999994	93.478	269	0.595677	0	0	0.805121	NaN	NaN	DQIPMNITPRLRRAASEPFNTAKDGLMREDY	_RAAS(ph)EPFNTAK_	P25341	S000000687	YCR091W	KIN82	protein KINase	Putative serine/threonine protein kinase; implicated in the regulation of phospholipid asymmetry through the activation of phospholipid translocases (flippases) Lem3p-Dnf1p/Dnf2p; KIN82 has a paralog, FPK1, that arose from the whole genome duplication
0.0229004	-0.109639	NaN	NaN	0.0945064	-0.147937	0.388148	0.130744	0.397365	0.0740944	0.10743	0.0806065	S				0.974822	250.27	501	0.199911	0.435773	0.905253	-0.0433693	0.116365	0.164874	TYLDTKICSDGFRTNSFVGTEEYLAPEVIRG	_TNS(ph)FVGTEEYLAPEVIR_	P25341	S000000687	YCR091W	KIN82	protein KINase	Putative serine/threonine protein kinase; implicated in the regulation of phospholipid asymmetry through the activation of phospholipid translocases (flippases) Lem3p-Dnf1p/Dnf2p; KIN82 has a paralog, FPK1, that arose from the whole genome duplication
0.462995	0.0546401	-1.04257	-0.766213	-0.129734	-1.05373	NaN	NaN	1.02496	-0.302333	NaN	NaN	S				0.767021	118.24	312	0.371548	0.374674	0.16583	-0.322788	-0.591734	0.361313	ARQLIALKENANSRSSAHMSSNAIQR_____	_SS(ph)AHMS(ph)SNAIQR_	P25342	S000000595	YCR002C	CDC10	Cell Division Cycle	Component of the septin ring, required for cytokinesis; septins are GTP-binding proteins that assemble into rod-like hetero-oligomers that can associate to form filaments; septin rings at the mother-bud neck act as scaffolds for recruiting cell division factors and as barriers to prevent diffusion of specific proteins between mother and daughter cells; N-terminus interacts with phosphatidylinosit…
-0.0123735	-0.190964	NaN	NaN	0.123534	-0.237847	NaN	NaN	1.02496	-0.302333	NaN	NaN	S				0.828625	95.854	316	0.338369	0.0942242	0.16583	-0.101669	-0.0571565	0.361313	IALKENANSRSSAHMSSNAIQR_________	_SSAHMS(ph)SNAIQR_	P25342	S000000595	YCR002C	CDC10	Cell Division Cycle	Component of the septin ring, required for cytokinesis; septins are GTP-binding proteins that assemble into rod-like hetero-oligomers that can associate to form filaments; septin rings at the mother-bud neck act as scaffolds for recruiting cell division factors and as barriers to prevent diffusion of specific proteins between mother and daughter cells; N-terminus interacts with phosphatidylinosit…
-0.172604	0.0938305	0.0126646	0.0774672	-0.125431	-0.468651	NaN	NaN	NaN	NaN	NaN	NaN	S				0.906124	95.854	317	0.0151019	0.476884	0	0.00283965	-0.297041	NaN	ALKENANSRSSAHMSSNAIQR__________	_SSAHM(ox)SS(ph)NAIQR_	P25342	S000000595	YCR002C	CDC10	Cell Division Cycle	Component of the septin ring, required for cytokinesis; septins are GTP-binding proteins that assemble into rod-like hetero-oligomers that can associate to form filaments; septin rings at the mother-bud neck act as scaffolds for recruiting cell division factors and as barriers to prevent diffusion of specific proteins between mother and daughter cells; N-terminus interacts with phosphatidylinosit…
NaN	NaN	NaN	NaN	NaN	NaN	NaN	NaN	NaN	NaN	NaN	NaN	S				0.893542	80.69	202	0	0	0	NaN	NaN	NaN	YFDTVHNRQSPSRRESPVTVFRQPSLSHSKS	_RES(ph)PVTVFR_	P25344	S000000537	YCL032W	STE50	STErile	Adaptor protein for various signaling pathways; involved in mating response, invasive/filamentous growth, osmotolerance; acts as an adaptor that links G protein-associated Cdc42p-Ste20p complex to the effector Ste11p to modulate signal transduction
0.215244	-0.0351209	-1.5691	-0.183328	NaN	NaN	NaN	NaN	0.406319	0.237931	-1.71004	-0.657091	S				1	72.652	313	0.399264	0	0.355711	-0.393077	NaN	-0.430721	TESIQSIDPILTRRQSVGLIRTYSLHEPTDA	_RQS(ph)VGLIR_	P25351	S000000617	YCR023C	YCR023C		Vacuolar membrane protein of unknown function; member of the multidrug resistance family; YCR023C is not an essential gene
0.353775	0.781653	-2.08457	0.387789	1.82595	2.02262	-2.22842	-0.428678	2.32754	2.47212	-2.21332	-0.14952	S				1	194.05	336	0.0735778	0.103965	0.205274	-0.140339	0.297867	0.609208	VNEYVNVDLKNVPTPSPSPKPQHRRKR____	_NVPT(ph)PS(ph)PS(ph)PKPQHRR_	P25358	S000000630	YCR034W	ELO2	fatty acid ELOngation	Fatty acid elongase, involved in sphingolipid biosynthesis; acts on fatty acids of up to 24 carbons in length; mutations have regulatory effects on 1,3-beta-glucan synthase, vacuolar ATPase, and the secretory pathway; FEN1 has a paralog, ELO1, that arose from the whole genome duplication
1.13567	1.39166	-2.08457	0.387789	1.79847	1.95973	-1.00784	0.329432	1.18992	1.23658	-4.00072	-2.04761	S				1	183.6	338	0.0912781	0.456069	0.273853	0.207635	0.769947	-0.905456	EYVNVDLKNVPTPSPSPKPQHRRKR______	_NVPT(ph)PS(ph)PS(ph)PKPQHRR_	P25358	S000000630	YCR034W	ELO2	fatty acid ELOngation	Fatty acid elongase, involved in sphingolipid biosynthesis; acts on fatty acids of up to 24 carbons in length; mutations have regulatory effects on 1,3-beta-glucan synthase, vacuolar ATPase, and the secretory pathway; FEN1 has a paralog, ELO1, that arose from the whole genome duplication
-0.153655	-0.339856	0.0855886	0.0837985	0.0965318	0.294665	0.159009	0.23817	-0.164723	-0.309413	-0.239887	0.0603672	S				0.999945	95.666	702	0.310959	1.69481	0.871406	-0.0810311	0.197094	-0.163414	QREWAHLAAHRDEIRSLLRDEEDVEGTDGRR	_S(ph)LLRDEEDVEGTDGRR_	P25371	S000000604	YCR011C	ADP1	ATP-Dependent Permease	Putative ATP-dependent permease of the ABC transporter family
-0.451978	-0.346701	0.940617	0.353524	-0.634061	-0.647784	NaN	NaN	NaN	NaN	NaN	NaN	S				0.966514	71.67	87	0.13725	2.16653	0	0.123865	-0.640922	NaN	DEVEATQMNDLTSAISPSSRQAQELEKNESS	_ADQGPQDEVEATQMNDLTSAIS(ph)PSSR_	P25376	S000000530	YCL025C	AGP1	high-Affinity Glutamine Permease	Low-affinity amino acid permease with broad substrate range; involved in uptake of asparagine, glutamine, and other amino acids; expression regulated by SPS plasma membrane amino acid sensor system (Ssy1p-Ptr3p-Ssy5p); AGP1 has a paralog, GNP1, that arose from the whole genome duplication
-0.808538	-0.738842	1.91572	1.07115	-1.07716	-0.822197	1.01578	0.468611	-0.910556	-1.08409	2.34029	1.38919	S				0.959	107.65	101	0.199394	0.0705761	0.190545	0.359871	-0.103742	0.433709	ISPSSRQAQELEKNESSDNIGANTGHKSDSL	_QAQELEKNES(ph)SDNIGANTGHK_	P25376	S000000530	YCL025C	AGP1	high-Affinity Glutamine Permease	Low-affinity amino acid permease with broad substrate range; involved in uptake of asparagine, glutamine, and other amino acids; expression regulated by SPS plasma membrane amino acid sensor system (Ssy1p-Ptr3p-Ssy5p); AGP1 has a paralog, GNP1, that arose from the whole genome duplication
-0.0964989	-0.252742	-0.204141	-0.226508	NaN	NaN	NaN	NaN	0.130008	-0.176854	NaN	NaN	S				0.963825	74.475	6	1.96717	0	0.0440438	-0.194972	NaN	-0.0234228	__________MSSSKSLYELKDLKNSSTEIH	_(ac)SSSKS(ph)LYELK_	P25376	S000000530	YCL025C	AGP1	high-Affinity Glutamine Permease	Low-affinity amino acid permease with broad substrate range; involved in uptake of asparagine, glutamine, and other amino acids; expression regulated by SPS plasma membrane amino acid sensor system (Ssy1p-Ptr3p-Ssy5p); AGP1 has a paralog, GNP1, that arose from the whole genome duplication
0.443925	0.196859	-0.42374	0.0905572	0.360308	0.454597	NaN	NaN	0.660381	0.390007	NaN	NaN	S				0.952967	74.123	424	0.153701	1.13469	0.794832	0.0769003	0.407453	0.525194	NNDHINESTVSSQYLSDDNELSLRPATERI_	_VNNDHINESTVSSQYLS(ph)DDNELSLRPATERI_	P25383	S000000525	YCL020W	YCL020W		Retrotransposon TYA Gag gene co-transcribed with TYB Pol; translated as TYA or TYA-TYB polyprotein; Gag is a nucleocapsid protein that is the structural constituent of virus-like particles (VLPs); similar to retroviral Gag
0.681674	1.28913	NaN	NaN	NaN	NaN	NaN	NaN	NaN	NaN	NaN	NaN	S				1	136.53	666	0.720468	0	0	0.9854	NaN	NaN	EKKIIETIRRSKFLGSLLNVRGGLSPGKSEL	_FLGS(ph)LLNVR_	P25389	S000000529	YCL024W	KCC4		Protein kinase of the bud neck involved in the septin checkpoint; associates with septin proteins, negatively regulates Swe1p by phosphorylation, shows structural homology to bud neck kinases Gin4p and Hsl1p; KCC4 has a paralog, GIN4, that arose from the whole genome duplication
NaN	NaN	NaN	NaN	NaN	NaN	NaN	NaN	NaN	NaN	NaN	NaN	S				0.999999	78.486	848	0	0	0	NaN	NaN	NaN	VVKLPSLSSFQGKNASGLGLYQREPSKVTLP	_NAS(ph)GLGLYQR_	P25389	S000000529	YCL024W	KCC4		Protein kinase of the bud neck involved in the septin checkpoint; associates with septin proteins, negatively regulates Swe1p by phosphorylation, shows structural homology to bud neck kinases Gin4p and Hsl1p; KCC4 has a paralog, GIN4, that arose from the whole genome duplication
NaN	NaN	NaN	NaN	NaN	NaN	0.0561312	0.481545	1.20207	0.914182	NaN	NaN	S				0.965674	179.58	439	0	0.370462	1.06512	NaN	0.268838	1.05813	RKRSSFLLSSNPTDSSPIPLRSSKRITHINV	_SSFLLSSNPTDSS(ph)PIPLR_	P25389	S000000529	YCL024W	KCC4		Protein kinase of the bud neck involved in the septin checkpoint; associates with septin proteins, negatively regulates Swe1p by phosphorylation, shows structural homology to bud neck kinases Gin4p and Hsl1p; KCC4 has a paralog, GIN4, that arose from the whole genome duplication
0.0384361	0.35095	-0.204141	-0.100036	0.00532815	0.0360461	-0.0219061	-0.028852	-0.0175193	0.314639	0.274268	0.209678	S				1	206.94	224	0.0599636	0.0535996	1.10738	0.0213024	-0.00234597	0.195266	HEDVETVKREIQEALSEKPTREPTPSVKTEP	_EIQEALS(ph)EKPT(ph)REPTPSVK_	P25441	S000002309	YDL150W	RPC53	RNA Polymerase C	RNA polymerase III subunit C53
0	0.0103502	NaN	NaN	0.39605	0.0504668	-0.156138	-0.240375	-0.115113	-0.0121407	NaN	NaN	S				0.999435	119.41	137	0.30103	0.0290681	0.363407	0.0051751	0.0125009	-0.0636269	SLVQKGLETIDNGAESSENEAEDDDNEGVAS	_GLETIDNGAES(ph)S(ph)ENEAEDDDNEGVASK_	P25441	S000002309	YDL150W	RPC53	RNA Polymerase C	RNA polymerase III subunit C53
0	0.0103502	NaN	NaN	0.39605	0.0504668	-0.156138	-0.240375	-0.115113	-0.0121407	NaN	NaN	S				0.999666	119.41	138	0.30103	0.0290681	0.363407	0.0051751	0.0125009	-0.0636269	LVQKGLETIDNGAESSENEAEDDDNEGVASK	_GLETIDNGAES(ph)S(ph)ENEAEDDDNEGVASK_	P25441	S000002309	YDL150W	RPC53	RNA Polymerase C	RNA polymerase III subunit C53
NaN	NaN	NaN	NaN	0.213503	0.228234	-0.115699	0.0882394	NaN	NaN	NaN	NaN	S				0.999572	121.33	178	0	0.54685	0	NaN	0.103569	NaN	EFEARNLIEDEDDGESEKSSDVDMDDEEWRS	_NLIEDEDDGES(ph)EKSS(ph)DVDMDDEEWR_	P25441	S000002309	YDL150W	RPC53	RNA Polymerase C	RNA polymerase III subunit C53
NaN	NaN	NaN	NaN	0.791439	0.497944	-0.115699	0.0882394	NaN	NaN	NaN	NaN	S				0.798148	121.33	182	0	0.659534	0	NaN	0.315481	NaN	RNLIEDEDDGESEKSSDVDMDDEEWRSKRIE	_NLIEDEDDGES(ph)EKSS(ph)DVDMDDEEWR_	P25441	S000002309	YDL150W	RPC53	RNA Polymerase C	RNA polymerase III subunit C53
NaN	NaN	NaN	NaN	-0.936635	-1.19278	0.937353	0.63803	NaN	NaN	NaN	NaN	S				0.957414	94.023	119	0	0.08916	0	NaN	-0.138507	NaN	SEKGDLRRGFIKSEGSGSSLVQKGLETIDNG	_SEGS(ph)GSSLVQK_	P25441	S000002309	YDL150W	RPC53	RNA Polymerase C	RNA polymerase III subunit C53
0.208018	0.334454	-0.658828	-0.396817	0.415218	0.215492	-0.719578	-0.138945	0.405666	0.415867	-0.827087	-0.253626	S				1	126.16	1075	0.202352	0.0790052	0.0746515	-0.128293	-0.0569533	-0.0647952	DTQSEFLRAADVENLSDDDEHRQNESRVFND	_AADVENLS(ph)DDDEHRQNESR_	P25558	S000000520	YCL014W	BUD3	BUD site selection	Protein involved in bud-site selection; required for axial budding pattern; localizes with septins to bud neck in mitosis and may constitute an axial landmark for next round of budding
0.414785	0.468948	NaN	NaN	NaN	NaN	-0.679874	-0.138421	NaN	NaN	NaN	NaN	S				1	91.64	1614	1.40928	0.429302	0	0.441867	-0.409148	NaN	TKDASYAYLKDFVALSDDEDEDGKQNCAVGG	_DFVALS(ph)DDEDEDGKQNCAVGGPEK_	P25558	S000000520	YCL014W	BUD3	BUD site selection	Protein involved in bud-site selection; required for axial budding pattern; localizes with septins to bud neck in mitosis and may constitute an axial landmark for next round of budding
0.306146	0.309991	NaN	NaN	NaN	NaN	NaN	NaN	NaN	NaN	NaN	NaN	S				0.99981	124.12	1063	2.40086	0	0	0.308068	NaN	NaN	RVSTTSAGDQRIDTQSEFLRAADVENLSDDD	_IDTQS(ph)EFLR_	P25558	S000000520	YCL014W	BUD3	BUD site selection	Protein involved in bud-site selection; required for axial budding pattern; localizes with septins to bud neck in mitosis and may constitute an axial landmark for next round of budding
0.377846	0.344715	-0.181421	-0.101112	0.354565	0.303342	-0.201759	0.146116	NaN	NaN	NaN	NaN	S				1	169.02	1183	0.295578	0.499673	0	0.110007	0.150566	NaN	NEGKDAKDIKLGDDYSDKETAKEITKPKNFV	_LGDDYS(ph)DKETAK_	P25558	S000000520	YCL014W	BUD3	BUD site selection	Protein involved in bud-site selection; required for axial budding pattern; localizes with septins to bud neck in mitosis and may constitute an axial landmark for next round of budding
0.376624	0.265797	0.355147	0.336573	0.303225	0.696973	NaN	NaN	NaN	NaN	NaN	NaN	S				1	103.83	1412	3.09248	0.622046	0	0.333535	0.500099	NaN	NNDEPDKRLMELKFPSQDEIPDDRFYTPAEE	_LMELKFPS(ph)QDEIPDDR_	P25558	S000000520	YCL014W	BUD3	BUD site selection	Protein involved in bud-site selection; required for axial budding pattern; localizes with septins to bud neck in mitosis and may constitute an axial landmark for next round of budding
0.785927	1.10568	0.309842	0.727141	1.08556	0.950244	-0.38637	0.366597	0.862273	0.905428	NaN	NaN	S				1	119.25	1443	1.68273	0.63863	1.80858	0.732147	0.504008	0.88385	PTAEFPVEELPNTPRSINVTTSNNKSTDDKL	_S(ph)INVTTSNNK_	P25558	S000000520	YCL014W	BUD3	BUD site selection	Protein involved in bud-site selection; required for axial budding pattern; localizes with septins to bud neck in mitosis and may constitute an axial landmark for next round of budding
0.901649	1.35072	NaN	NaN	NaN	NaN	NaN	NaN	NaN	NaN	NaN	NaN	S				0.869953	122.33	1226	0.902099	0	0	1.12619	NaN	NaN	IPRLAPPASKINFQRSPSYIELFQGMRVVLD	_S(ph)PSYIELFQGMR_	P25558	S000000520	YCL014W	BUD3	BUD site selection	Protein involved in bud-site selection; required for axial budding pattern; localizes with septins to bud neck in mitosis and may constitute an axial landmark for next round of budding
0.898634	0.631896	NaN	NaN	1.34682	-0.102651	NaN	NaN	NaN	NaN	NaN	NaN	S				0.994114	138.19	1228	0.959217	0.26088	0	0.765265	0.622082	NaN	RLAPPASKINFQRSPSYIELFQGMRVVLDKH	_SPS(ph)YIELFQGMR_	P25558	S000000520	YCL014W	BUD3	BUD site selection	Protein involved in bud-site selection; required for axial budding pattern; localizes with septins to bud neck in mitosis and may constitute an axial landmark for next round of budding
-0.245181	-0.236265	-0.525367	-0.596744	0.0282862	0.188274	-0.300885	-0.204391	-0.691826	-0.41133	0.819343	0.0913715	S				0.999996	143.14	1160	1.63068	0.250487	0.0487635	-0.400889	-0.0721789	-0.0481102	TQKLSPQASKVLTENSNELKDTNNEGKDAKD	_VLT(ph)ENS(ph)NELKDTNNEGKDAK_	P25558	S000000520	YCL014W	BUD3	BUD site selection	Protein involved in bud-site selection; required for axial budding pattern; localizes with septins to bud neck in mitosis and may constitute an axial landmark for next round of budding
NaN	NaN	NaN	NaN	NaN	NaN	NaN	NaN	NaN	NaN	NaN	NaN	S				0.957455	98.592	433	0	0	0	NaN	NaN	NaN	TKEDSAPVAAGESESSL______________	_EDSAPVAAGESESS(ph)L_	P25567	S000000542	YCL037C	SRO9	Suppressor of rho3	Cytoplasmic RNA-binding protein; shuttles between nucleus and cytoplasm and is exported from the nucleus in an mRNA export-dependent manner; associates with translating ribosomes; involved in heme regulation of Hap1p as a component of the HMC complex, also involved in the organization of actin filaments; contains a La motif; SRO9 has a paralog, SLF1, that arose from the whole genome duplication
0.153157	0.109294	NaN	NaN	NaN	NaN	-0.0832474	-0.0508847	-0.317229	0.140779	0.366931	0.230211	S				0.999222	129.37	474	0.977063	0.821831	0.276297	0.131225	-0.067066	0.105173	TPDGKEEMNRLKSNDSNEYSKSEGQIRTNSQ	_SNDS(ph)NEYSKSEGQIR_	P25579	S000000556	YCL051W	LRE1	Laminarase REsistance	Protein involved in control of cell wall structure and stress response; direct inhibitor of the nuclear Dbf2 related (NDR) kinase Cbk1p-Mob2p; overproduction confers resistance to cell-wall degrading enzymes; exhibits genetic interactions with genes involved in the cell wall integrity pathway; LRE1 has a paralog, HLR1, that arose from the whole genome duplication
NaN	NaN	NaN	NaN	0.467905	0.271067	-0.0606008	-0.130931	NaN	NaN	NaN	NaN	S				0.991986	61.538	529	0	0.394597	0	NaN	0.13686	NaN	KDYIEDNDDEGVEGDSDDDEAITNLISKLKG	_KEEEGKDYIEDNDDEGVEGDS(ph)DDDEAITNLISK_	P25582	S000000559	YCL054W	SPB1	Suppressor of PaB1 mutant	AdoMet-dependent methyltransferase; involved in rRNA processing and 60S ribosomal subunit maturation; methylates G2922 in the tRNA docking site of the large subunit rRNA and in the absence of snR52, U2921; suppressor of PAB1 mutants
0.731705	0.857264	1.15692	0.934538	0.120086	0.182565	0.67708	0.642459	0.567059	0.510658	1.12863	0.941697	S				1	166.04	241	2.70977	1.15015	1.88062	0.920106	0.405548	0.787011	TLMSLSNRAKLRRNASDADIVNIKILRRNSR	_RNAS(ph)DADIVNIK_	P25587	S000000511	YCL005W	LDB16	Low Dye Binding	Protein of unknown function; null mutants have decreased net negative cell surface charge; GFP-fusion protein expression is induced in response to the DNA-damaging agent MMS; native protein is detected in purified mitochondria
1.00396	0.772646	-0.826681	-0.248535	0.199625	0.413919	-0.300299	0.0715728	0.396927	0.684908	-0.327112	0.326046	S				1	223.81	605	0.147954	0.246756	0.52962	0.175348	0.0962043	0.270192	LKQKKSHHVKHIINESDSDTEVEAKPKEKAD	_HIINES(ph)DS(ph)DT(ph)EVEAKPK_	P25588	S000000566	YCL061C	MRC1	Mediator of the Replication Checkpoint	S-phase checkpoint protein required for DNA replication; couples DNA helicase and DNA polymerase; interacts with and stabilizes Pol2p at stalled replication forks during stress, where it forms a pausing complex with Tof1p and is phosphorylated by Mec1p; with Hog1p defines a novel S-phase checkpoint that permits eukaryotic cells to prevent conflicts between DNA replication and transcription; prote…
0.631896	0.71396	-0.25181	-0.191689	0.199625	0.413919	-0.300299	0.0715728	0.396927	0.684908	-0.478402	0.228537	S				1	223.81	607	0.348708	0.246756	0.335081	0.225589	0.0962043	0.207992	QKKSHHVKHIINESDSDTEVEAKPKEKADES	_HIINES(ph)DS(ph)DT(ph)EVEAKPK_	P25588	S000000566	YCL061C	MRC1	Mediator of the Replication Checkpoint	S-phase checkpoint protein required for DNA replication; couples DNA helicase and DNA polymerase; interacts with and stabilizes Pol2p at stalled replication forks during stress, where it forms a pausing complex with Tof1p and is phosphorylated by Mec1p; with Hog1p defines a novel S-phase checkpoint that permits eukaryotic cells to prevent conflicts between DNA replication and transcription; prote…
NaN	NaN	NaN	NaN	NaN	NaN	NaN	NaN	NaN	NaN	NaN	NaN	S				0.883541	195.7	312	0	0	0	NaN	NaN	NaN	AAPETKEAVPESPRASGETAIHEPEPEAEQA	_AS(ph)GETAIHEPEPEAEQAVEDTA_	P25619	S000000615	YCR021C	HSP30	Heat Shock Protein	Negative regulator of the H(+)-ATPase Pma1p; stress-responsive protein; hydrophobic plasma membrane localized; induced by heat shock, ethanol treatment, weak organic acid, glucose limitation, and entry into stationary phase
-6.55476	-7.33119	7.59155	0.819648	-6.05515	-7.23074	7.18453	0.960974	-6.65305	-7.1398	NaN	NaN	S				1	133.23	308	0.141261	0.138441	1.64865	-1.36869	-1.2851	-6.89642	DVEDAAPETKEAVPESPRASGETAIHEPEPE	_EAVPES(ph)PR_	P25619	S000000615	YCR021C	HSP30	Heat Shock Protein	Negative regulator of the H(+)-ATPase Pma1p; stress-responsive protein; hydrophobic plasma membrane localized; induced by heat shock, ethanol treatment, weak organic acid, glucose limitation, and entry into stationary phase
1.51531	1.39879	1.89808	2.04311	NaN	NaN	NaN	NaN	1.47643	1.41159	1.9149	2.31804	S				0.999912	99.387	405	2.81638	0	2.45511	1.71382	NaN	1.78024	SIYQKQRRPTYSSSKSNNWTPGEASDTPPLP	_S(ph)NNWTPGEASDTPPLPPHATPK_	P25623	S000000626	YCR030C	SYP1	Suppressor of Yeast Profilin deletion	Negative regulator of WASP-Arp23 complex; involved in endocytic site formation; directly inhibits Las17p stimulation of Arp23 complex-mediated actin assembly in vitro; may regulate assembly and disassembly of the septin ring; colocalizes and interacts with septin subunits; potential role in actin cytoskeletal organization
NaN	NaN	NaN	NaN	NaN	NaN	NaN	NaN	NaN	NaN	-1.7688	-0.632268	S				0.999914	85.522	347	0	0	0.550603	NaN	NaN	-1.20053	LKSKKSSHTLRSKVGSIFGRNKTKNKRQQQS	_SKVGS(ph)IFGR_	P25623	S000000626	YCR030C	SYP1	Suppressor of Yeast Profilin deletion	Negative regulator of WASP-Arp23 complex; involved in endocytic site formation; directly inhibits Las17p stimulation of Arp23 complex-mediated actin assembly in vitro; may regulate assembly and disassembly of the septin ring; colocalizes and interacts with septin subunits; potential role in actin cytoskeletal organization
-0.424126	-0.68309	NaN	NaN	0.0357646	0.0766959	-0.0207689	-0.158725	NaN	NaN	NaN	NaN	S				0.999495	85.573	45	0.834851	0.115957	0	-0.553608	-0.0167583	NaN	VTYDNVILPQESMEVSPRSSTTSLVEPVEST	_HSVTYDNVILPQESMEVS(ph)PR_	P25628	S000000644	YCR048W	ARE1	Acyl-coenzyme A: cholesterol acyl transferase-Related Enzyme	Acyl-CoA:sterol acyltransferase; endoplasmic reticulum enzyme that contributes the major sterol esterification activity in the absence of oxygen; ARE1 has a paralog, ARE2, that arose from the whole genome duplication
NaN	NaN	NaN	NaN	0.0126402	0.0535284	NaN	NaN	NaN	NaN	NaN	NaN	S				0.968	64.203	912	0	0.452998	0	NaN	0.0330843	NaN	FNGKDNKLPLSNENDSSDEEENEKELP____	_DNKLPLSNENDS(ph)S(ph)DEEENEKELP_	P25635	S000000653	YCR057C	PWP2	Periodic tryptophan (W) Protein	Conserved 90S pre-ribosomal component; essential for proper endonucleolytic cleavage of the 35 S rRNA precursor at A0, A1, and A2 sites; contains eight WD-repeats; PWP2 deletion leads to defects in cell cycle and bud morphogenesis
NaN	NaN	NaN	NaN	0.0126402	0.0535284	NaN	NaN	NaN	NaN	NaN	NaN	S				0.96434	64.203	913	0	0.452998	0	NaN	0.0330843	NaN	NGKDNKLPLSNENDSSDEEENEKELP_____	_DNKLPLSNENDS(ph)S(ph)DEEENEKELP_	P25635	S000000653	YCR057C	PWP2	Periodic tryptophan (W) Protein	Conserved 90S pre-ribosomal component; essential for proper endonucleolytic cleavage of the 35 S rRNA precursor at A0, A1, and A2 sites; contains eight WD-repeats; PWP2 deletion leads to defects in cell cycle and bud morphogenesis
-0.108099	0.442439	-0.00158601	0.130176	-0.678626	-0.355368	0.0320051	-0.227125	-0.0257937	-0.0113698	0.0783047	0.112693	S				1	162.71	651	0.394074	0.889633	0.471281	0.115733	-0.307279	0.0384586	TEAGSLDLIDDAGENSDLEDRIDNSLPGSQR	_MTEAGSLDLIDDAGENS(ph)DLEDR_	P25635	S000000653	YCR057C	PWP2	Periodic tryptophan (W) Protein	Conserved 90S pre-ribosomal component; essential for proper endonucleolytic cleavage of the 35 S rRNA precursor at A0, A1, and A2 sites; contains eight WD-repeats; PWP2 deletion leads to defects in cell cycle and bud morphogenesis
0.106214	0.107018	-0.449324	-0.399335	0.274172	0.377068	0.23686	0.161056	0.109829	0.179893	-0.332393	-0.0703893	S				1	167.1	232	0.423521	1.9997	0.0858771	-0.158857	0.262289	-0.0282651	VWEFTKRPSDDDDNESEDDDKQEEVDISKYS	_RPSDDDDNES(ph)EDDDKQEEVDISK_	P25635	S000000653	YCR057C	PWP2	Periodic tryptophan (W) Protein	Conserved 90S pre-ribosomal component; essential for proper endonucleolytic cleavage of the 35 S rRNA precursor at A0, A1, and A2 sites; contains eight WD-repeats; PWP2 deletion leads to defects in cell cycle and bud morphogenesis
0.216486	0.198871	NaN	NaN	NaN	NaN	1.13708	0.702492	NaN	NaN	NaN	NaN	S				0.999768	79.382	219	1.56893	0.830651	0	0.207679	0.919784	NaN	TIPLNDLESTPVMVNSARGSPSPSSNRDTLF	_EYRPVDTIPLNDLESTPVMVNS(ph)AR_	P25639	S000000657	YCR061W	YCR061W		Protein of unknown function; green fluorescent protein (GFP)-fusion protein localizes to the cytoplasm in a punctate pattern; induced by treatment with 8-methoxypsoralen and UVA irradiation
-0.667195	-0.890118	NaN	NaN	0.128293	0.0708015	0.0759458	0.664791	-1.37467	-1.47121	NaN	NaN	S				0.993406	250.04	456	1.04328	0.696939	1.66582	-0.778656	0.234958	-1.42294	TGSSAAAVASKQRRRSSYAFNNGNGATNLNK	_RRS(ph)SYAFNNGNGATNLNK_	P25644	S000000673	YCR077C	PAT1	Protein Associated with Topoisomerase II	Deadenylation-dependent mRNA-decapping factor; also required for faithful chromosome transmission, maintenance of rDNA locus stability, and protection of mRNA 3'-UTRs from trimming; associated with topoisomerase II; binds to mRNAs under glucose starvation, most often in the 3' UTR; functionally linked to Pab1p; forms cytoplasmic foci upon DNA replication stress; phosphorylation by PKA inhibits P …
-0.667195	-0.890118	NaN	NaN	0.128293	0.0708015	0.0759458	0.664791	-0.438112	-1.27352	NaN	NaN	S				0.97559	250.04	457	1.04328	0.696939	0.539004	-0.778656	0.234958	-0.855815	GSSAAAVASKQRRRSSYAFNNGNGATNLNKS	_RRS(ph)S(ph)YAFNNGNGATNLNK_	P25644	S000000673	YCR077C	PAT1	Protein Associated with Topoisomerase II	Deadenylation-dependent mRNA-decapping factor; also required for faithful chromosome transmission, maintenance of rDNA locus stability, and protection of mRNA 3'-UTRs from trimming; associated with topoisomerase II; binds to mRNAs under glucose starvation, most often in the 3' UTR; functionally linked to Pab1p; forms cytoplasmic foci upon DNA replication stress; phosphorylation by PKA inhibits P …
NaN	NaN	NaN	NaN	-0.498301	-1.34084	NaN	NaN	NaN	NaN	NaN	NaN	S				0.99768	82.663	78	0	0.563073	0	NaN	-0.919572	NaN	SGNAIGGNGVGATARSYVAATAEGISGPRTD	_S(ph)YVAATAEGISGPR_	P25644	S000000673	YCR077C	PAT1	Protein Associated with Topoisomerase II	Deadenylation-dependent mRNA-decapping factor; also required for faithful chromosome transmission, maintenance of rDNA locus stability, and protection of mRNA 3'-UTRs from trimming; associated with topoisomerase II; binds to mRNAs under glucose starvation, most often in the 3' UTR; functionally linked to Pab1p; forms cytoplasmic foci upon DNA replication stress; phosphorylation by PKA inhibits P …
0.155879	0.0106367	-0.447844	-0.469469	0.0911243	-0.290162	0.405451	0.30893	0.274292	0.0855606	0.0233871	0.204067	S				0.999783	140.83	519	0.489998	0.33239	1.09175	-0.187699	0.128836	0.146827	EYPVLHPDQYTKFGLSPSKGVLFYGPPGTGK	_FGLS(ph)PSK_	P25694	S000002284	YDL126C	CDC48	Cell Division Cycle	AAA ATPase; subunit of polyubiquitin-selective segregase complex involved in ERAD, cell wall integrity during heat stress, mitotic spindle disassembly; subunit of complex involved in mitochondria-associated degradation; role in mobilizing membrane bound transcription factors by regulated ubiquitin/proteasome-dependent processing, in macroautophagy, PMN, RAD, ribophagy, homotypic ER membrane fusio…
0.250598	0.000144286	-0.130536	0.0301919	0.16954	0.114367	NaN	NaN	0.256648	0.0699771	-0.29337	0.232379	S				0.999975	138.76	770	0.175851	0.912948	0.195924	0.0375996	0.141954	0.0664085	KEHFAEAMKTAKRSVSDAELRRYEAYSQQMK	_SVS(ph)DAELR_	P25694	S000002284	YDL126C	CDC48	Cell Division Cycle	AAA ATPase; subunit of polyubiquitin-selective segregase complex involved in ERAD, cell wall integrity during heat stress, mitotic spindle disassembly; subunit of complex involved in mitochondria-associated degradation; role in mobilizing membrane bound transcription factors by regulated ubiquitin/proteasome-dependent processing, in macroautophagy, PMN, RAD, ribophagy, homotypic ER membrane fusio…
NaN	NaN	NaN	NaN	0.121944	-0.36264	-0.207018	-0.0825664	0.385265	0.412185	NaN	NaN	S				0.999227	127.17	235	0	0.543683	1.66791	NaN	-0.13257	0.398725	SELFKGYLADDIDADSLEDIYTSAHEAIRAD	_GYLADDIDADS(ph)LEDIYTSAHEAIR_	P26321	S000006052	YPL131W	RPL5	Ribosomal Protein of the Large subunit	Ribosomal 60S subunit protein L5; homologous to mammalian ribosomal protein L5 and bacterial L18; binds 5S rRNA and is required for 60S subunit assembly
NaN	NaN	-0.943284	-0.46999	NaN	NaN	NaN	NaN	NaN	NaN	NaN	NaN	S				0.929073	39.338	142	0.686713	0	0	-0.706637	NaN	NaN	AAADLPPSMIQMEPKSPILKTNNSSTHVSKH	_AAADLPPSMIQMEPKS(ph)PILK_	P26570	S000004478	YML016C	PPZ1	Protein Phosphatase Z	Serine/threonine protein phosphatase Z, isoform of Ppz2p; involved in regulation of potassium transport, which affects osmotic stability, cell cycle progression, and halotolerance; PPZ1 has a paralog, PPZ2, that arose from the whole genome duplication
NaN	NaN	NaN	NaN	NaN	NaN	NaN	NaN	-0.399121	-0.228774	NaN	NaN	S				0.971211	51.398	690	0	0	0.773	NaN	NaN	-0.313947	QQQQMMETSITNDNESQQ_____________	_KLANQQQQMMETSITNDNES(ph)QQ_	P26570	S000004478	YML016C	PPZ1	Protein Phosphatase Z	Serine/threonine protein phosphatase Z, isoform of Ppz2p; involved in regulation of potassium transport, which affects osmotic stability, cell cycle progression, and halotolerance; PPZ1 has a paralog, PPZ2, that arose from the whole genome duplication
1.5213	1.45943	1.29701	1.81076	NaN	NaN	NaN	NaN	NaN	NaN	NaN	NaN	S				0.999369	87.319	265	3.1209	0	0	1.52213	NaN	NaN	SFGSDGNTAYSTPLNSPGLSKLTDHSGEYFT	_KSSFGSDGNTAYST(ph)PLNS(ph)PGLSK_	P26570	S000004478	YML016C	PPZ1	Protein Phosphatase Z	Serine/threonine protein phosphatase Z, isoform of Ppz2p; involved in regulation of potassium transport, which affects osmotic stability, cell cycle progression, and halotolerance; PPZ1 has a paralog, PPZ2, that arose from the whole genome duplication
-0.948614	-0.84218	NaN	NaN	-0.045223	-0.0953579	-0.351063	-0.250962	NaN	NaN	NaN	NaN	S				0.987016	163.91	185	1.4226	1.10853	0	-0.895397	-0.185651	NaN	KRAFTKKVSSASAAASESDVAKQLASFGY__	_KVSSASAAAS(ph)ESDVAK_	P26785	S000005013	YNL069C	RPL16B	Ribosomal Protein of the Large subunit	Ribosomal 60S subunit protein L16B; N-terminally acetylated, binds 5.8 S rRNA; transcriptionally regulated by Rap1p; homologous to mammalian ribosomal protein L13A and bacterial L13; RPL16B has a paralog, RPL16A, that arose from the whole genome duplication
-0.960834	-0.615862	0.268434	-0.395611	-1.06338	-0.456623	-0.158596	-0.430178	-0.0224197	0.453439	0.0962522	-0.197362	S				0.989708	161.68	187	0.701918	1.15405	0.22835	-0.425968	-0.527194	0.0824772	AFTKKVSSASAAASESDVAKQLASFGY____	_KVSSASAAASES(ph)DVAK_	P26785	S000005013	YNL069C	RPL16B	Ribosomal Protein of the Large subunit	Ribosomal 60S subunit protein L16B; N-terminally acetylated, binds 5.8 S rRNA; transcriptionally regulated by Rap1p; homologous to mammalian ribosomal protein L13A and bacterial L13; RPL16B has a paralog, RPL16A, that arose from the whole genome duplication
0.0311129	0.0651587	-0.453649	-0.28238	0.161049	0.28558	-0.267236	-0.159113	-0.504469	-0.325395	-0.547154	-0.181929	S				0.999837	91.583	186	0.535107	0.0125872	1.72014	-0.15994	0.00507009	-0.389737	LSRFQYKSALDVGEHSDSSDIEVDHTKSTDP	_SALDVGEHS(ph)DS(ph)S(ph)DIEVDHTK_	P27344	S000000482	YBR278W	DPB3	DNA Polymerase B (II) subunit	Third-largest subunit of DNA polymerase II (DNA polymerase epsilon); required to maintain fidelity of chromosomal replication and also for inheritance of telomeric silencing; stabilizes the interaction of Pol epsilon with primer-template DNA, positively affecting the processivity of the polymerase and exonuclease activities of Pol epsilon; mRNA abundance peaks at the G1/S boundary of the cell cyc…
0.0311129	0.0651587	-0.453649	-0.28238	0.497229	0.395502	-0.267236	-0.159113	0.199123	0.233397	-0.547154	-0.181929	S				0.999571	91.583	188	0.535107	0.23062	0.146641	-0.15994	0.116595	-0.0741408	RFQYKSALDVGEHSDSSDIEVDHTKSTDP__	_SALDVGEHS(ph)DS(ph)S(ph)DIEVDHTK_	P27344	S000000482	YBR278W	DPB3	DNA Polymerase B (II) subunit	Third-largest subunit of DNA polymerase II (DNA polymerase epsilon); required to maintain fidelity of chromosomal replication and also for inheritance of telomeric silencing; stabilizes the interaction of Pol epsilon with primer-template DNA, positively affecting the processivity of the polymerase and exonuclease activities of Pol epsilon; mRNA abundance peaks at the G1/S boundary of the cell cyc…
0.0311129	0.0651587	-0.453649	-0.28238	0.497229	0.395502	-0.267236	-0.159113	0.199123	0.233397	-0.547154	-0.181929	S				0.999546	77.873	189	0.535107	0.23062	0.146641	-0.15994	0.116595	-0.0741408	FQYKSALDVGEHSDSSDIEVDHTKSTDP___	_SALDVGEHS(ph)DS(ph)S(ph)DIEVDHTK_	P27344	S000000482	YBR278W	DPB3	DNA Polymerase B (II) subunit	Third-largest subunit of DNA polymerase II (DNA polymerase epsilon); required to maintain fidelity of chromosomal replication and also for inheritance of telomeric silencing; stabilizes the interaction of Pol epsilon with primer-template DNA, positively affecting the processivity of the polymerase and exonuclease activities of Pol epsilon; mRNA abundance peaks at the G1/S boundary of the cell cyc…
-0.617233	-0.407364	NaN	NaN	-0.376133	-0.971403	0.89757	0.782744	NaN	NaN	NaN	NaN	S				0.993695	199.41	417	0.890689	0.0623063	0	-0.512298	0.0831947	NaN	VLAEKEKFLNINRVCSSDSDLPGSDIKSLDE	_FLNINRVCS(ph)SDSDLPGSDIK_	P27466	S000001910	YFR014C	CMK1	CalModulin dependent protein Kinase	Calmodulin-dependent protein kinase; may play a role in stress response, many Ca++/calmodulin dependent phosphorylation substrates demonstrated in vitro, amino acid sequence similar to mammalian Cam Kinase II; CMK1 has a paralog, CMK2, that arose from the whole genome duplication
-0.168269	-0.377969	NaN	NaN	-0.622976	-0.44087	0.634688	0.187543	NaN	NaN	NaN	NaN	S				0.966679	126.63	418	0.631986	0.0715545	0	-0.273119	-0.0604039	NaN	LAEKEKFLNINRVCSSDSDLPGSDIKSLDEA	_VCSS(ph)DSDLPGSDIK_	P27466	S000001910	YFR014C	CMK1	CalModulin dependent protein Kinase	Calmodulin-dependent protein kinase; may play a role in stress response, many Ca++/calmodulin dependent phosphorylation substrates demonstrated in vitro, amino acid sequence similar to mammalian Cam Kinase II; CMK1 has a paralog, CMK2, that arose from the whole genome duplication
-1.27049	-1.39411	NaN	NaN	NaN	NaN	NaN	NaN	NaN	NaN	NaN	NaN	S				0.921541	59.728	11	1.52997	0	0	-1.3323	NaN	NaN	_____MDDKVSEKESSPKQTEEDSEGKMAHV	_(ac)M(ox)DDKVSEKESS(ph)PK_	P27466	S000001910	YFR014C	CMK1	CalModulin dependent protein Kinase	Calmodulin-dependent protein kinase; may play a role in stress response, many Ca++/calmodulin dependent phosphorylation substrates demonstrated in vitro, amino acid sequence similar to mammalian Cam Kinase II; CMK1 has a paralog, CMK2, that arose from the whole genome duplication
0.238909	-0.0630323	-0.424277	-0.222805	-0.35511	-0.480881	-0.0571383	-0.124461	-0.160347	-0.673141	0.192546	0.211147	S				1	121.04	651	0.335471	1.08503	0.194086	-0.117801	-0.254397	-0.107448	DALAGGKKLKVARPLSVPGSPRDLRSNSTVY	_VARPLS(ph)VPGS(ph)PRDLR_	P27472	S000004248	YLR258W	GSY2	Glycogen SYnthase	Glycogen synthase; expression induced by glucose limitation, nitrogen starvation, heat shock, and stationary phase; activity regulated by cAMP-dependent, Snf1p and Pho85p kinases as well as by the Gac1p-Glc7p phosphatase; GSY2 has a paralog, GSY1, that arose from the whole genome duplication; relocalizes from cytoplasm to plasma membrane upon DNA replication stress
0.499476	0.373509	0.279564	0.554994	0.524565	0.413594	-0.144177	0.345345	0.591871	0.628634	0.752923	1.16952	S				1	129.89	655	2.2009	0.825701	2.01861	0.426886	0.284832	0.785736	GGKKLKVARPLSVPGSPRDLRSNSTVYMTPG	_VARPLS(ph)VPGS(ph)PRDLR_	P27472	S000004248	YLR258W	GSY2	Glycogen SYnthase	Glycogen synthase; expression induced by glucose limitation, nitrogen starvation, heat shock, and stationary phase; activity regulated by cAMP-dependent, Snf1p and Pho85p kinases as well as by the Gac1p-Glc7p phosphatase; GSY2 has a paralog, GSY1, that arose from the whole genome duplication; relocalizes from cytoplasm to plasma membrane upon DNA replication stress
NaN	NaN	-0.363676	-0.13711	NaN	NaN	NaN	NaN	NaN	NaN	NaN	NaN	S				0.99963	125.98	295	0.567869	0	0	-0.250393	NaN	NaN	TILTYASLNKGTRRPSNTFNLDADRINNDEN	_RPS(ph)NTFNLDADR_	P27514	S000005296	YNR013C	PHO91	PHOsphate metabolism	Low-affinity vacuolar phosphate transporter; exports phosphate from the vacuolar lumen to the cytosol; regulates phosphate and polyphosphate metabolism; acts upstream of Pho81p in regulation of the PHO pathway; deletion of pho84, pho87, pho89, pho90, and pho91 causes synthetic lethality; transcription independent of Pi and Pho4p activity; overexpression results in vigorous growth
NaN	NaN	NaN	NaN	NaN	NaN	-0.552869	-0.263756	NaN	NaN	NaN	NaN	S				0.757186	87.088	562	0	0.664303	0	NaN	-0.408312	NaN	HKSAIPSSSSLPLSSSPTRNSPVNSVQSPSR	_SAIPSSSSLPLSSS(ph)PTR_	P27636	S000000072	YAR019C	CDC15	Cell Division Cycle	Protein kinase of the Mitotic Exit Network; localized to the spindle pole bodies at late anaphase; promotes mitotic exit by directly switching on the kinase activity of Dbf2p; required for spindle disassembly after meiosis II; relocalizes to the cytoplasm upon DNA replication stress
NaN	NaN	NaN	NaN	NaN	NaN	NaN	NaN	NaN	NaN	NaN	NaN	S				0.989925	106.19	655	0	0	0	NaN	NaN	NaN	SSSEEDFYMDEQRAVSSASINSSLSGSRALS	_AVS(ph)SAS(ph)INSSLSGSR_	P27637	S000000069	YAR014C	BUD14	BUD site selection	Protein involved in bud-site selection; Bud14p-Glc7p complex is a cortical regulator of dynein; inhibitor of the actin assembly factor Bnr1p (formin); diploid mutants display a random budding pattern instead of the wild-type bipolar pattern; relative distribution to the nucleus increases upon DNA replication stress
NaN	NaN	NaN	NaN	NaN	NaN	NaN	NaN	NaN	NaN	NaN	NaN	S				0.801265	106.19	658	0	0	0	NaN	NaN	NaN	EEDFYMDEQRAVSSASINSSLSGSRALSNTN	_AVS(ph)SAS(ph)INSSLSGSR_	P27637	S000000069	YAR014C	BUD14	BUD site selection	Protein involved in bud-site selection; Bud14p-Glc7p complex is a cortical regulator of dynein; inhibitor of the actin assembly factor Bnr1p (formin); diploid mutants display a random budding pattern instead of the wild-type bipolar pattern; relative distribution to the nucleus increases upon DNA replication stress
0.675364	0.557091	NaN	NaN	NaN	NaN	NaN	NaN	NaN	NaN	NaN	NaN	S				0.991477	113.88	378	1.21533	0	0	0.616228	NaN	NaN	PTPALNGYGKGNKSVSFNDVVGYADRFIDDA	_SVS(ph)FNDVVGYADR_	P27637	S000000069	YAR014C	BUD14	BUD site selection	Protein involved in bud-site selection; Bud14p-Glc7p complex is a cortical regulator of dynein; inhibitor of the actin assembly factor Bnr1p (formin); diploid mutants display a random budding pattern instead of the wild-type bipolar pattern; relative distribution to the nucleus increases upon DNA replication stress
0.15069	0.0536674	-0.588133	-0.224781	NaN	NaN	NaN	NaN	NaN	NaN	-0.173383	0.27521	S				1	204.23	1032	0.370372	0	0.0665629	-0.152139	NaN	0.0509134	WGGNNNNKSTRDGGASAWGNQDDGNRSAWNN	_DGGAS(ph)AWGNQDDGNR_	P27692	S000004470	YML010W	SPT5	SuPpressor of Ty's	Component of the universally conserved Spt4/5 complex (DSIF complex); the complex has multiple roles in concert with RNA polymerases I and II, including regulation of transcription elongation, RNA processing, quality control, and transcription-coupled DNA repair
NaN	NaN	NaN	NaN	NaN	NaN	NaN	NaN	NaN	NaN	NaN	NaN	S				0.990674	176.25	1058	0	0	0	NaN	NaN	NaN	SAWNNQGNKSNYGGNSTWGGH__________	_SNYGGNS(ph)TWGGH_	P27692	S000004470	YML010W	SPT5	SuPpressor of Ty's	Component of the universally conserved Spt4/5 complex (DSIF complex); the complex has multiple roles in concert with RNA polymerases I and II, including regulation of transcription elongation, RNA processing, quality control, and transcription-coupled DNA repair
-0.537927	-1.29103	-0.0434844	-0.554245	-0.45906	-1.13362	1.24852	0.888808	-0.7747	-1.69073	NaN	NaN	S				0.839348	197.36	302	1.00261	0.0842122	0.644984	-0.606671	0.136161	-1.23272	NANPNNNGSLRAQTQSSVQLKRPSSVLSLND	_AQTQS(ph)SVQLK_	P27705	S000003003	YGL035C	MIG1	Multicopy Inhibitor of GAL gene expression	Transcription factor involved in glucose repression; sequence specific DNA binding protein containing two Cys2His2 zinc finger motifs; regulated by the SNF1 kinase and the GLC7 phosphatase; regulates filamentous growth along with Mig2p in response to glucose depletion; shuttles between cytosol and nucleus depending on external glucose levels and its phosphorylation state
NaN	NaN	NaN	NaN	NaN	NaN	NaN	NaN	NaN	NaN	NaN	NaN	S				0.956344	107.25	179	0	0	0	NaN	NaN	NaN	FEIGESGGNDPYMVSSPKTMAKIPVSVKPPP	_FEIGESGGNDPYMVSS(ph)PK_	P27705	S000003003	YGL035C	MIG1	Multicopy Inhibitor of GAL gene expression	Transcription factor involved in glucose repression; sequence specific DNA binding protein containing two Cys2His2 zinc finger motifs; regulated by the SNF1 kinase and the GLC7 phosphatase; regulates filamentous growth along with Mig2p in response to glucose depletion; shuttles between cytosol and nucleus depending on external glucose levels and its phosphorylation state
0.439357	-0.259962	-1.24501	-0.918386	NaN	NaN	NaN	NaN	0.169155	-0.430081	-1.15562	-0.710702	S				0.999715	160.48	264	0.559533	0	0.821093	-0.496	NaN	-0.531812	DGPEQKQLQQQQNSLSPRYSNTVILPRPRSL	_QLQQQQNSLS(ph)PR_	P27705	S000003003	YGL035C	MIG1	Multicopy Inhibitor of GAL gene expression	Transcription factor involved in glucose repression; sequence specific DNA binding protein containing two Cys2His2 zinc finger motifs; regulated by the SNF1 kinase and the GLC7 phosphatase; regulates filamentous growth along with Mig2p in response to glucose depletion; shuttles between cytosol and nucleus depending on external glucose levels and its phosphorylation state
-0.78076	-1.46446	-0.981853	-1.2734	0.524565	0.09815	0.0646609	0.224166	0.908352	0.378068	NaN	NaN	S				0.999428	145.1	314	2.29467	0.929248	0.60395	-1.12512	0.227885	0.64321	QTQSSVQLKRPSSVLSLNDLLVGQRNTNESD	_RPS(ph)SVLS(ph)LNDLLVGQR_	P27705	S000003003	YGL035C	MIG1	Multicopy Inhibitor of GAL gene expression	Transcription factor involved in glucose repression; sequence specific DNA binding protein containing two Cys2His2 zinc finger motifs; regulated by the SNF1 kinase and the GLC7 phosphatase; regulates filamentous growth along with Mig2p in response to glucose depletion; shuttles between cytosol and nucleus depending on external glucose levels and its phosphorylation state
-0.973611	-1.43475	-0.867738	-0.564232	0.238175	-0.0284105	-0.776778	-0.400756	-0.55349	-0.977384	NaN	NaN	S				0.970049	231.25	278	1.88707	0.45088	0.764549	-0.960084	-0.241942	-0.765437	LSPRYSNTVILPRPRSLTDFQGLNNANPNNN	_S(ph)LTDFQGLNNANPNNNGSLR_	P27705	S000003003	YGL035C	MIG1	Multicopy Inhibitor of GAL gene expression	Transcription factor involved in glucose repression; sequence specific DNA binding protein containing two Cys2His2 zinc finger motifs; regulated by the SNF1 kinase and the GLC7 phosphatase; regulates filamentous growth along with Mig2p in response to glucose depletion; shuttles between cytosol and nucleus depending on external glucose levels and its phosphorylation state
-0.825517	-1.50426	NaN	NaN	NaN	NaN	-0.00317045	0.113302	NaN	NaN	NaN	NaN	S				0.999137	95.981	377	0.743584	0.28583	0	-1.16489	0.0550656	NaN	QSRKKSKTSTPTTMLSRSTSGTNLHTLGYVM	_TST(ph)PTTM(ox)LS(ph)R_	P27705	S000003003	YGL035C	MIG1	Multicopy Inhibitor of GAL gene expression	Transcription factor involved in glucose repression; sequence specific DNA binding protein containing two Cys2His2 zinc finger motifs; regulated by the SNF1 kinase and the GLC7 phosphatase; regulates filamentous growth along with Mig2p in response to glucose depletion; shuttles between cytosol and nucleus depending on external glucose levels and its phosphorylation state
NaN	NaN	-1.04488	0.0176653	NaN	NaN	NaN	NaN	NaN	NaN	NaN	NaN	S				0.999754	102.07	972	0.291781	0	0	-0.513609	NaN	NaN	LRLSNINSNSVQSVISPKKHAIEDENKSSEN	_LSNINSNSVQSVIS(ph)PK_	P27895	S000000787	YEL061C	CIN8	Chromosome INstability	Kinesin motor protein; involved in mitotic spindle assembly and chromosome segregation
NaN	NaN	NaN	NaN	NaN	NaN	-0.671022	1.7699	NaN	NaN	NaN	NaN	S				0.776778	149.18	395	0	0.136259	0	NaN	0.549437	NaN	YRILWRGILKDDRSDSESDEESDESSTTPTD	_SDS(ph)ESDEESDESSTTPTDSTPTKK_	P28496	S000001491	YKL008C	LAC1	Longevity-Assurance gene Cognate (LAG1 Cognate)	Ceramide synthase component; involved in synthesis of ceramide from C26(acyl)-coenzyme A and dihydrosphingosine or phytosphingosine, functionally equivalent to Lag1p; LAC1 has a paralog, LAG1, that arose from the whole genome duplication
NaN	NaN	NaN	NaN	NaN	NaN	NaN	NaN	NaN	NaN	NaN	NaN	S				0.838009	91.416	397	0	0	0	NaN	NaN	NaN	ILWRGILKDDRSDSESDEESDESSTTPTDST	_SDSES(ph)DEESDESSTTPTDSTPTKK_	P28496	S000001491	YKL008C	LAC1	Longevity-Assurance gene Cognate (LAG1 Cognate)	Ceramide synthase component; involved in synthesis of ceramide from C26(acyl)-coenzyme A and dihydrosphingosine or phytosphingosine, functionally equivalent to Lag1p; LAC1 has a paralog, LAG1, that arose from the whole genome duplication
NaN	NaN	NaN	NaN	-0.0028449	-0.307626	0.520293	0.961929	1.01685	0.955387	NaN	NaN	S				0.943161	153.75	7	0	0.427386	1.70259	NaN	0.292938	0.98612	_________MSTIKPSPSNNNLKVRSRPRRK	_(ac)STIKPS(ph)PSNNNLK_	P28496	S000001491	YKL008C	LAC1	Longevity-Assurance gene Cognate (LAG1 Cognate)	Ceramide synthase component; involved in synthesis of ceramide from C26(acyl)-coenzyme A and dihydrosphingosine or phytosphingosine, functionally equivalent to Lag1p; LAC1 has a paralog, LAG1, that arose from the whole genome duplication
0.971737	0.992116	NaN	NaN	NaN	NaN	NaN	NaN	1.01685	0.955387	0.487075	0.915419	S				0.994879	220.64	9	2.18006	0	2.2212	0.981926	NaN	0.843684	_______MSTIKPSPSNNNLKVRSRPRRKSS	_(ac)STIKPSPS(ph)NNNLK_	P28496	S000001491	YKL008C	LAC1	Longevity-Assurance gene Cognate (LAG1 Cognate)	Ceramide synthase component; involved in synthesis of ceramide from C26(acyl)-coenzyme A and dihydrosphingosine or phytosphingosine, functionally equivalent to Lag1p; LAC1 has a paralog, LAG1, that arose from the whole genome duplication
NaN	NaN	-1.48923	-0.981633	NaN	NaN	-1.78123	-1.09498	0.661932	0.0985544	-2.28694	-1.55031	S				1	82.651	132	0.889447	0.8265	0.460585	-1.23543	-1.43811	-0.769191	PNQRVVSELIAPANLSPQRVVSLPTVTEEAL	_VVSELIAPANLS(ph)PQR_	P28708	S000001599	YKL116C	PRR1	Pheromone Response Regulator	Serine/threonine protein kinase; inhibits pheromone induced signaling downstream of MAPK, possibly at the level of the Ste12p transcription factor
0.14991	-0.308805	NaN	NaN	NaN	NaN	NaN	NaN	NaN	NaN	NaN	NaN	S				0.987149	77.969	104	0.103631	0	0	-0.0794478	NaN	NaN	SKIETELTKISDDILSVLDSHLIPSATTGES	_ISDDILS(ph)VLDSHLIPSATTGESK_	P29311	S000000979	YER177W	BMH1	Brain Modulosignalin Homologue	14-3-3 protein, major isoform; controls proteome at post-transcriptional level, binds proteins and DNA, involved in regulation of exocytosis, vesicle transport, Ras/MAPK and rapamycin-sensitive signaling, aggresome formation, spindle position checkpoint; protein increases in abundance and relative distribution to the nucleus increases upon DNA replication stress; antiapoptotic gene similar to hum…
-0.403809	-0.306591	0.182655	0.0614507	NaN	NaN	NaN	NaN	NaN	NaN	NaN	NaN	S				0.754918	71.344	4	0.327845	0	0	-0.116574	NaN	NaN	____________MSTSREDSVYLAKLAEQAE	_(ac)STS(ph)REDSVYLAK_	P29311	S000000979	YER177W	BMH1	Brain Modulosignalin Homologue	14-3-3 protein, major isoform; controls proteome at post-transcriptional level, binds proteins and DNA, involved in regulation of exocytosis, vesicle transport, Ras/MAPK and rapamycin-sensitive signaling, aggresome formation, spindle position checkpoint; protein increases in abundance and relative distribution to the nucleus increases upon DNA replication stress; antiapoptotic gene similar to hum…
NaN	NaN	NaN	NaN	NaN	NaN	NaN	NaN	NaN	NaN	-2.57003	-1.35873	S				0.990657	106.86	21	0	0	0.720352	NaN	NaN	-1.96438	KLSKRDSNGSKGRITSADISTPSHDNGSVIK	_ITS(ph)ADISTPSHDNGSVIK_	P29366	S000000404	YBR200W	BEM1	Bud EMergence	Protein containing SH3-domains; involved in establishing cell polarity and morphogenesis; functions as a scaffold protein for complexes that include Cdc24p, Ste5p, Ste20p, and Rsr1p
0.145351	0.0182068	1.2525	0.651677	-0.148145	-0.195798	0.168787	0.123088	0.284869	0.44668	-0.267596	-0.723864	S				1	141.13	458	0.788185	0.0470672	0.0841741	0.516934	-0.0130168	-0.0649777	DNTLTGEDLKLNKKLSDLSLSGSKQAPAQST	_KLS(ph)DLS(ph)LSGSK_	P29366	S000000404	YBR200W	BEM1	Bud EMergence	Protein containing SH3-domains; involved in establishing cell polarity and morphogenesis; functions as a scaffold protein for complexes that include Cdc24p, Ste5p, Ste20p, and Rsr1p
0.145351	0.0182068	1.2525	0.651677	0.381948	0.909427	-1.54424	-0.944409	0.284869	0.44668	0.260256	0.300253	S				0.999967	141.13	461	0.788185	0.196871	2.33918	0.516934	-0.299318	0.323014	LTGEDLKLNKKLSDLSLSGSKQAPAQSTSGL	_KLS(ph)DLS(ph)LSGSK_	P29366	S000000404	YBR200W	BEM1	Bud EMergence	Protein containing SH3-domains; involved in establishing cell polarity and morphogenesis; functions as a scaffold protein for complexes that include Cdc24p, Ste5p, Ste20p, and Rsr1p
0.753776	0.774334	NaN	NaN	NaN	NaN	-0.63914	-0.0936954	1.38703	1.08291	NaN	NaN	S				0.766839	199.3	147	2.06732	0.390049	1.10793	0.764055	-0.366417	1.23497	DEFDKDGDVDNFEESSTQPINKSIKPLRKET	_ISDEGVAEDEFDKDGDVDNFEESS(ph)TQPINK_	P29465	S000000227	YBR023C	CHS3	CHitin Synthase-related	Chitin synthase III; catalyzes the transfer of N-acetylglucosamine (GlcNAc) to chitin; required for synthesis of the majority of cell wall chitin, the chitin ring during bud emergence, and spore wall chitosan; contains overlapping di-leucine and di-acidic signals that mediate, respectively, intracellular trafficking by AP-1 and trafficking to plasma membrane by exomer complex; requires AP-3 compl…
0.0977456	0.219958	-0.338795	-0.217479	-0.0296175	0.0426443	-0.303225	0.132926	NaN	NaN	-0.135272	-0.0762854	S				0.999998	112.01	1637	0.167664	0.152425	0.761686	-0.0596426	-0.0393182	-0.105779	NSSKQTEKSKVDDLRSDEDEHGTVAQEKHQV	_SKVDDLRS(ph)DEDEHGTVAQEK_	P29539	S000000479	YBR275C	RIF1	RAP1-Interacting Factor	Protein that binds to the Rap1p C-terminus; acts synergistically with Rif2p to help control telomere length and establish telomeric silencing; contributes to resection of DNA double strand breaks (DSBs); deletion results in telomere elongation
0.202386	0.235359	-0.235605	-0.187388	-0.0822857	-0.0347662	-0.054779	0.189335	0.347212	0.128425	-0.275841	0.243575	S				1	127.57	55	0.00953679	0.0229539	0.322408	0.00368837	0.004376	0.110843	GKITLESHEIQRAPASDDEDRIQIKPVNDED	_APAS(ph)DDEDRIQIK_	P30605	S000002905	YDR497C	ITR1	myo-Inositol TRansporter	Myo-inositol transporter; member of the sugar transporter superfamily; expression is repressed by inositol and choline via Opi1p and derepressed via Ino2p and Ino4p; relative distribution to the vacuole increases upon DNA replication stress; ITR1 has a paralog, ITR2, that arose from the whole genome duplication
-2.15676	-2.49167	-1.16678	-1.89255	-0.757452	-1.1251	-0.172231	-0.50711	-2.73879	-3.09271	-2.02722	-2.62333	S				1	167.88	26	2.19519	1.30151	2.8864	-1.92694	-0.640474	-2.62051	KTSQSNVGDAVGNADSVEFNSEHDSPSKRGK	_TSQSNVGDAVGNADS(ph)VEFNS(ph)EHDSPSKR_	P30605	S000002905	YDR497C	ITR1	myo-Inositol TRansporter	Myo-inositol transporter; member of the sugar transporter superfamily; expression is repressed by inositol and choline via Opi1p and derepressed via Ino2p and Ino4p; relative distribution to the vacuole increases upon DNA replication stress; ITR1 has a paralog, ITR2, that arose from the whole genome duplication
-1.88982	-2.17072	-1.14365	-1.41408	-0.483339	-0.927524	-0.396817	-0.295958	-2.12746	-2.54086	NaN	NaN	S				0.997689	139.51	31	2.25113	1.488	1.25004	-1.65457	-0.52591	-2.33416	NVGDAVGNADSVEFNSEHDSPSKRGKITLES	_TSQSNVGDAVGNADS(ph)VEFNS(ph)EHDSPSKR_	P30605	S000002905	YDR497C	ITR1	myo-Inositol TRansporter	Myo-inositol transporter; member of the sugar transporter superfamily; expression is repressed by inositol and choline via Opi1p and derepressed via Ino2p and Ino4p; relative distribution to the vacuole increases upon DNA replication stress; ITR1 has a paralog, ITR2, that arose from the whole genome duplication
-1.94203	-2.17521	-1.13724	-1.58981	-0.428449	-0.435222	-0.529371	-0.77484	-2.42128	-2.9025	NaN	NaN	S				0.985521	167.88	35	2.3208	2.16736	1.24118	-1.71107	-0.541971	-2.66189	AVGNADSVEFNSEHDSPSKRGKITLESHEIQ	_T(ph)SQSNVGDAVGNADS(ph)VEFNS(ph)EHDS(ph)PSKR_	P30605	S000002905	YDR497C	ITR1	myo-Inositol TRansporter	Myo-inositol transporter; member of the sugar transporter superfamily; expression is repressed by inositol and choline via Opi1p and derepressed via Ino2p and Ino4p; relative distribution to the vacuole increases upon DNA replication stress; ITR1 has a paralog, ITR2, that arose from the whole genome duplication
-2.09943	-2.35196	-0.452279	-0.471864	-0.428449	-0.921609	-0.453965	-0.313942	NaN	NaN	NaN	NaN	S				0.969143	103.46	37	1.10466	1.53711	0	-1.34388	-0.529491	NaN	GNADSVEFNSEHDSPSKRGKITLESHEIQRA	_TS(ph)QSNVGDAVGNADS(ph)VEFNS(ph)EHDSPS(ph)KR_	P30605	S000002905	YDR497C	ITR1	myo-Inositol TRansporter	Myo-inositol transporter; member of the sugar transporter superfamily; expression is repressed by inositol and choline via Opi1p and derepressed via Ino2p and Ino4p; relative distribution to the vacuole increases upon DNA replication stress; ITR1 has a paralog, ITR2, that arose from the whole genome duplication
-0.0832635	0.0501883	0.491227	0.421728	-0.33909	-0.196327	0.452215	0.225261	-0.130744	-0.0231818	0.504448	0.414595	S				1	178.14	46	0.66945	0.0660887	0.506656	0.21997	0.0355149	0.191279	SEHDSPSKRGKITLESHEIQRAPASDDEDRI	_ITLES(ph)HEIQR_	P30605	S000002905	YDR497C	ITR1	myo-Inositol TRansporter	Myo-inositol transporter; member of the sugar transporter superfamily; expression is repressed by inositol and choline via Opi1p and derepressed via Ino2p and Ino4p; relative distribution to the vacuole increases upon DNA replication stress; ITR1 has a paralog, ITR2, that arose from the whole genome duplication
NaN	NaN	0.296315	0.0845786	NaN	NaN	NaN	NaN	NaN	NaN	NaN	NaN	S				0.822542	50.102	193	0.490806	0	0	0.190447	NaN	NaN	LCVITGEYPIVRYSVSNPVEEEDARNGNAVV	_YSVS(ph)NPVEEEDAR_	P30619	S000002571	YDR164C	SEC1	SECretory	Sm-like protein involved in docking and fusion of exocytic vesicles; binds to assembled SNARE complexes at the membrane and stimulates membrane fusion; localization to sites of secretion (bud neck and bud tip) is dependent on SNARE function; interacts directly with essential exocyst subunit Sec6p
0.0364681	0.0703893	-0.732486	-0.55719	0.28238	0.504468	NaN	NaN	0.758559	0.525267	-0.961105	-0.66512	S				0.873289	156.73	68	0.611595	0.75664	0.068572	-0.295705	0.393424	-0.0855996	QNLSQGEGNIRAAIGSSPLNFPSSSQRQNSD	_AAIGS(ph)SPLNFPSSSQR_	P30665	S000006223	YPR019W	MCM4	MiniChromosome Maintenance	Essential helicase component of heterohexameric MCM2-7 complexes; MCM2-7 complexes bind pre-replication complexes on DNA and melt DNA prior to replication; forms an Mcm4p-6p-7p subcomplex; shows nuclear accumulation in G1; homolog of S. pombe Cdc21p
NaN	NaN	NaN	NaN	NaN	NaN	-0.149129	-0.125122	NaN	NaN	-0.373063	0.0495316	S				0.996985	106.39	69	0	1.25503	0.233563	NaN	-0.137126	-0.161766	NLSQGEGNIRAAIGSSPLNFPSSSQRQNSDV	_AAIGSS(ph)PLNFPSSSQR_	P30665	S000006223	YPR019W	MCM4	MiniChromosome Maintenance	Essential helicase component of heterohexameric MCM2-7 complexes; MCM2-7 complexes bind pre-replication complexes on DNA and melt DNA prior to replication; forms an Mcm4p-6p-7p subcomplex; shows nuclear accumulation in G1; homolog of S. pombe Cdc21p
2.81367	3.15402	NaN	NaN	2.7458	2.64145	NaN	NaN	2.40626	2.67744	0.0791427	2.68464	S				1	229.96	52	1.44047	1.90908	1.27656	2.98384	2.69363	1.96187	YSSSSSQGDIYGRNNSQNLSQGEGNIRAAIG	_NNS(ph)QNLSQGEGNIR_	P30665	S000006223	YPR019W	MCM4	MiniChromosome Maintenance	Essential helicase component of heterohexameric MCM2-7 complexes; MCM2-7 complexes bind pre-replication complexes on DNA and melt DNA prior to replication; forms an Mcm4p-6p-7p subcomplex; shows nuclear accumulation in G1; homolog of S. pombe Cdc21p
NaN	NaN	NaN	NaN	NaN	NaN	NaN	NaN	NaN	NaN	NaN	NaN	S				0.816299	205.43	56	0	0	0	NaN	NaN	NaN	LFEEAQVTETGFRSPSASDNSCAYCGIDSAK	_SPS(ph)ASDNSCAYCGIDSAK_	P30771	S000004685	YMR080C	NAM7	Nuclear Accommodation of Mitochondria	ATP-dependent RNA helicase of the SFI superfamily; involved in nonsense mediated mRNA decay; required for efficient translation termination at nonsense codons and targeting of NMD substrates to P-bodies; binds to the small ribosomal subunit via an interaction with Rps26; forms cytoplasmic foci upon DNA replication stress
0.400866	0.0723116	NaN	NaN	NaN	NaN	-0.24245	0.235467	NaN	NaN	NaN	NaN	S				0.86587	83.776	13	0.412982	0.00405838	0	0.236589	-0.00349151	NaN	___MSSSTPFDPYALSEHDEERPQNVQSKSR	_(ac)SSSTPFDPYALS(ph)EHDEERPQNVQSK_	P31109	S000000028	YAL030W	SNC1	Suppressor of the Null allele of CAP	Vesicle membrane receptor protein (v-SNARE); involved in the fusion between Golgi-derived secretory vesicles with the plasma membrane; proposed to be involved in endocytosis; member of the synaptobrevin/VAMP family of R-type v-SNARE proteins; SNC1 has a paralog, SNC2, that arose from the whole genome duplication
NaN	NaN	NaN	NaN	0.248656	0.161952	NaN	NaN	NaN	NaN	NaN	NaN	S				0.893556	82.267	237	0	0.877842	0	NaN	0.205304	NaN	RKVTIVGRISGVEVESPTSFPVQSLIPKPLE	_ISGVEVES(ph)PTSFPVQSLIPKPLESVK_	P31116	S000003900	YJR139C	HOM6	HOMoserine requiring	Homoserine dehydrogenase (L-homoserine:NADP oxidoreductase); dimeric enzyme that catalyzes the third step in the common pathway for methionine and threonine biosynthesis; enzyme has nucleotide-binding, dimerization and catalytic regions
0.0973411	-0.345729	0.28207	0.428935	-0.153126	-0.327584	0.384829	0.425908	NaN	NaN	NaN	NaN	S				1	184.21	109	0.266924	0.159024	0	0.115654	0.0825069	NaN	NDNDEIIEIKEERDVSDDDEPLTKKRKTTAR	_DVS(ph)DDDEPLTK_	P31244	S000000318	YBR114W	RAD16	RADiation sensitive	Nucleotide excision repair (NER) protein; binds damaged DNA during NER; binds DNA in an ATP-dependent manner (with Rad7p) during NER; required for NER of non-transcribed chromatin; subunit of Nucleotide Excision Repair Factor 4 (NEF4) and the Elongin-Cullin-Socs (ECS) ligase complex
0.457542	0.10916	NaN	NaN	NaN	NaN	NaN	NaN	0.00877379	-0.339071	0.279196	0.112069	S				0.999961	190.85	25	0.454813	0	0.038837	0.283351	NaN	0.015242	RRTRSTKKSVNYNELSDDDTAVKNSKTLQLK	_SVNYNELS(ph)DDDTAVKNSK_	P31244	S000000318	YBR114W	RAD16	RADiation sensitive	Nucleotide excision repair (NER) protein; binds damaged DNA during NER; binds DNA in an ATP-dependent manner (with Rad7p) during NER; required for NER of non-transcribed chromatin; subunit of Nucleotide Excision Repair Factor 4 (NEF4) and the Elongin-Cullin-Socs (ECS) ligase complex
0.278223	-0.0673643	0.382984	0.807806	0.342896	0.165687	-0.0561673	0.113052	0.221197	0.109427	0.0401409	0.349916	S				0.97932	143.46	40	0.832154	0.735536	1.11675	0.350412	0.141367	0.18017	SVIEPISLSTTFKQSSPANPIGTYEYSRSQN	_QSS(ph)PANPIGTYEYSR_	P31373	S000000010	YAL012W	CYS3	CYStathionine gamma-lyase	Cystathionine gamma-lyase; catalyzes one of the two reactions involved in the transsulfuration pathway that yields cysteine from homocysteine with the intermediary formation of cystathionine; protein abundance increases in response to DNA replication stress
-1.45206	-1.77977	NaN	NaN	0.0448837	-0.391475	0.472669	0.434734	NaN	NaN	NaN	NaN	S				1	116.45	255	1.19156	0.269766	0	-1.61591	0.140203	NaN	PNLDPTHSQTFHRANSLAYLPSILPEQDPLL	_ANS(ph)LAYLPSILPEQDPLLK_	P31374	S000000015	YAL017W	PSK1	Pas domain-containing Serine/threonine protein Kinase	PAS domain-containing serine/threonine protein kinase; coordinately regulates protein synthesis and carbohydrate metabolism and storage in response to a unknown metabolite that reflects nutritional status; PSK1 has a paralog, PSK2, that arose from the whole genome duplication
NaN	NaN	0.630349	0.174361	NaN	NaN	-0.40294	2.14554	0.568227	-0.657081	NaN	NaN	S				0.99969	89.629	286	0.483861	0.208883	0.0204901	0.402355	0.871301	-0.0444273	KHNNSLFRGDYGNNISPERPSFRQPFKDQTS	_GDYGNNIS(ph)PERPSFR_	P31374	S000000015	YAL017W	PSK1	Pas domain-containing Serine/threonine protein Kinase	PAS domain-containing serine/threonine protein kinase; coordinately regulates protein synthesis and carbohydrate metabolism and storage in response to a unknown metabolite that reflects nutritional status; PSK1 has a paralog, PSK2, that arose from the whole genome duplication
NaN	NaN	NaN	NaN	NaN	NaN	NaN	NaN	0.23131	-0.100685	0.909499	0.266993	S				0.950487	145.33	1020	0	0	0.658667	NaN	NaN	0.326779	KVDENLIISKISLSPSTESLADSKSSGKGLS	_ISLSPS(ph)T(ph)ESLADSKSSGK_	P31374	S000000015	YAL017W	PSK1	Pas domain-containing Serine/threonine protein Kinase	PAS domain-containing serine/threonine protein kinase; coordinately regulates protein synthesis and carbohydrate metabolism and storage in response to a unknown metabolite that reflects nutritional status; PSK1 has a paralog, PSK2, that arose from the whole genome duplication
NaN	NaN	NaN	NaN	NaN	NaN	0.191491	0.299276	0.576667	0.726134	0.909499	0.266993	S				0.992155	173.51	1023	0	0.861279	1.70432	NaN	0.245384	0.619823	ENLIISKISLSPSTESLADSKSSGKGLSPLE	_ISLSPS(ph)TES(ph)LADSKSSGK_	P31374	S000000015	YAL017W	PSK1	Pas domain-containing Serine/threonine protein Kinase	PAS domain-containing serine/threonine protein kinase; coordinately regulates protein synthesis and carbohydrate metabolism and storage in response to a unknown metabolite that reflects nutritional status; PSK1 has a paralog, PSK2, that arose from the whole genome duplication
0.271784	0.390778	NaN	NaN	NaN	NaN	NaN	NaN	NaN	NaN	NaN	NaN	S				0.830764	119.38	607	0.946428	0	0	0.331281	NaN	NaN	PTLSSSSTLSLPKMASSPTGSKLEYSLERKI	_MAS(ph)SPTGSKLEYSLER_	P31374	S000000015	YAL017W	PSK1	Pas domain-containing Serine/threonine protein Kinase	PAS domain-containing serine/threonine protein kinase; coordinately regulates protein synthesis and carbohydrate metabolism and storage in response to a unknown metabolite that reflects nutritional status; PSK1 has a paralog, PSK2, that arose from the whole genome duplication
0.338681	0.289834	-0.412727	-0.230941	NaN	NaN	NaN	NaN	NaN	NaN	-0.52717	-0.070252	S				0.888136	119.38	608	0.00649421	0	0.381262	-0.00378812	NaN	-0.298711	TLSSSSTLSLPKMASSPTGSKLEYSLERKIL	_MASS(ph)PTGSKLEYSLER_	P31374	S000000015	YAL017W	PSK1	Pas domain-containing Serine/threonine protein Kinase	PAS domain-containing serine/threonine protein kinase; coordinately regulates protein synthesis and carbohydrate metabolism and storage in response to a unknown metabolite that reflects nutritional status; PSK1 has a paralog, PSK2, that arose from the whole genome duplication
0.149129	0.107152	-0.205893	-0.0647449	NaN	NaN	NaN	NaN	NaN	NaN	NaN	NaN	S				0.85226	129.46	451	0.014236	0	0	-0.00358908	NaN	NaN	EKEDTKAVVEGFDETSAEPTPAPAPAPVERE	_AVVEGFDETS(ph)AEPTPAPAPAPVER_	P31380	S000000017	YAL019W	FUN30	Function Unknown Now	Snf2p family member with ATP-dependent chromatin remodeling activity; has a role in silencing at the mating type locus, telomeres and centromeres; enriched at centromeres and is required for correct chromatin structure around centromeres, as well as at the boundary element of the silent HMR; recruited to DNA double-strand breaks (DSBs) where it promotes 5' strand resection of DSBs; potential Cdc2…
0.443819	0.470615	-0.967021	-0.259664	-0.668708	-1.00778	NaN	NaN	NaN	NaN	NaN	NaN	S				1	113.86	58	0.0789797	0.896044	0	-0.0780628	-0.838245	NaN	EHSDEEGDNYSEREQSVSTEPLDTLPLRKKL	_EQS(ph)VS(ph)TEPLDTLPLR_	P31381	S000000020	YAL022C	FUN26	Function Unknown Now	High affinity, broad selectivity, nucleoside/nucleobase transporter; vacuolar membrane localized transporter which may regulate the balance of nicotinamide riboside (NmR) levels between the cytosol and vacuole, contributing to salvage of NmR for use in cytosolic NAD+ synthesis; equilibrative nucleoside transporter (ENT) family member
0.628727	0.745539	NaN	NaN	-0.668708	-1.00778	NaN	NaN	NaN	NaN	NaN	NaN	S				0.999222	113.86	60	1.26775	0.896044	0	0.687133	-0.838245	NaN	SDEEGDNYSEREQSVSTEPLDTLPLRKKLKN	_EQS(ph)VS(ph)TEPLDTLPLR_	P31381	S000000020	YAL022C	FUN26	Function Unknown Now	High affinity, broad selectivity, nucleoside/nucleobase transporter; vacuolar membrane localized transporter which may regulate the balance of nicotinamide riboside (NmR) levels between the cytosol and vacuole, contributing to salvage of NmR for use in cytosolic NAD+ synthesis; equilibrative nucleoside transporter (ENT) family member
-0.527221	-0.262123	NaN	NaN	-0.47303	-0.613586	NaN	NaN	-0.434247	-0.594117	NaN	NaN	S				0.983438	108.77	278	0.685561	1.08675	1.00796	-0.394672	-0.543308	-0.514182	QQPTGDSTPSGTATNSAVSTPLTPKIELFAN	_KQQPTGDSTPSGTATNS(ph)AVS(ph)TPLTPK_	P31384	S000000019	YAL021C	CCR4	Carbon Catabolite Repression	Component of the CCR4-NOT transcriptional complex; CCR4-NOT is involved in regulation of gene expression; component of the major cytoplasmic deadenylase, which is involved in mRNA poly(A) tail shortening
-0.527221	-0.262123	NaN	NaN	0.0798389	-0.0422785	-0.106214	0.583657	-0.434247	-0.594117	NaN	NaN	S				0.949959	97.352	281	0.685561	0.327068	1.00796	-0.394672	0.128751	-0.514182	TGDSTPSGTATNSAVSTPLTPKIELFANGKD	_KQQPTGDSTPSGTAT(ph)NSAVS(ph)T(ph)PLTPK_	P31384	S000000019	YAL021C	CCR4	Carbon Catabolite Repression	Component of the CCR4-NOT transcriptional complex; CCR4-NOT is involved in regulation of gene expression; component of the major cytoplasmic deadenylase, which is involved in mRNA poly(A) tail shortening
0.2587	0.275722	NaN	NaN	0.809003	0.790355	NaN	NaN	NaN	NaN	NaN	NaN	S				0.998589	84.375	2	1.69313	2.12946	0	0.267211	0.799679	NaN	______________MSQQTPQESEQTTAKEQ	_(ac)S(ph)QQTPQESEQTTAK_	P31385	S000000011	YAL013W	DEP1	Disability in regulation of Expression of genes involved in Phospholipid biosynthesis	Component of the Rpd3L histone deacetylase complex; required for diauxic shift-induced histone H2B deposition onto rDNA genes; transcriptional modulator involved in regulation of structural phospholipid biosynthesis genes and metabolically unrelated genes, as well as maintenance of telomeres, mating efficiency, and sporulation
NaN	NaN	NaN	NaN	NaN	NaN	1.35594	0.766971	NaN	NaN	1.07534	1.26133	S				0.984004	77.894	888	0	0.763746	1.29614	NaN	1.06146	1.16833	SLKSKLASKAYVMKRSASYTGAKV_______	_RS(ph)ASYTGAKV_	P31688	S000002481	YDR074W	TPS2	Trehalose-6-phosphate PhoSphatase	Phosphatase subunit of the trehalose-6-P synthase/phosphatase complex; involved in synthesis of the storage carbohydrate trehalose; expression is induced by stress conditions and repressed by the Ras-cAMP pathway; protein abundance increases in response to DNA replication stress
0.478299	0.0402613	1.81797	1.66091	0.00532815	-0.679804	0.933022	0.859928	0.607105	0.144177	1.61675	1.46849	S				0.999803	171.92	890	0.972127	0.28559	1.14343	0.999359	0.279619	0.95913	KSKLASKAYVMKRSASYTGAKV_________	_SAS(ph)YTGAKV_	P31688	S000002481	YDR074W	TPS2	Trehalose-6-phosphate PhoSphatase	Phosphatase subunit of the trehalose-6-P synthase/phosphatase complex; involved in synthesis of the storage carbohydrate trehalose; expression is induced by stress conditions and repressed by the Ras-cAMP pathway; protein abundance increases in response to DNA replication stress
-0.0690432	-0.253412	NaN	NaN	0.524966	0.162726	0.634352	0.412021	NaN	NaN	NaN	NaN	S				1	169.92	228	0.480618	1.63319	0	-0.161228	0.433516	NaN	TTSNGEPNSRILRFYSYVDMLNDEKLAQANN	_FYS(ph)YVDMLNDEK_	P32047	S000005018	YNL074C	MLF3	Multicopy suppressor of LeFlunomide sensitivity	Serine-rich protein of unknown function; predicted to be palmitoylated; overproduction suppresses growth inhibition caused by exposure to immunosuppressant leflunomide; MLF3 has a paralog, VHS2, that arose from the whole genome duplication
-0.611777	-0.794232	NaN	NaN	NaN	NaN	0.267323	0.202705	NaN	NaN	-2.16903	-1.34301	S				0.991431	118.36	74	1.08537	1.0606	0.832512	-0.703005	0.235014	-1.75602	PISGSEVRTPSLRKNSNNVSSPLDNVIPTSR	_KNS(ph)NNVSSPLDNVIPTSR_	P32047	S000005018	YNL074C	MLF3	Multicopy suppressor of LeFlunomide sensitivity	Serine-rich protein of unknown function; predicted to be palmitoylated; overproduction suppresses growth inhibition caused by exposure to immunosuppressant leflunomide; MLF3 has a paralog, VHS2, that arose from the whole genome duplication
NaN	NaN	NaN	NaN	-0.783738	-1.04862	NaN	NaN	-0.716457	-0.728359	NaN	NaN	S				0.788454	107.57	78	0	1.03907	2.28033	NaN	-0.916179	-0.722408	SEVRTPSLRKNSNNVSSPLDNVIPTSRSASN	_KNSNNVS(ph)SPLDNVIPTSR_	P32047	S000005018	YNL074C	MLF3	Multicopy suppressor of LeFlunomide sensitivity	Serine-rich protein of unknown function; predicted to be palmitoylated; overproduction suppresses growth inhibition caused by exposure to immunosuppressant leflunomide; MLF3 has a paralog, VHS2, that arose from the whole genome duplication
-0.191442	-0.324184	NaN	NaN	-0.0416101	-0.882784	0.833516	0.542059	NaN	NaN	NaN	NaN	S				0.999995	215.11	439	0.794775	0.105064	0	-0.257813	0.112795	NaN	ELRVEKVSEVLKKKVSNGGFSTEFNSCDT__	_KVS(ph)NGGFSTEFNSCDT_	P32047	S000005018	YNL074C	MLF3	Multicopy suppressor of LeFlunomide sensitivity	Serine-rich protein of unknown function; predicted to be palmitoylated; overproduction suppresses growth inhibition caused by exposure to immunosuppressant leflunomide; MLF3 has a paralog, VHS2, that arose from the whole genome duplication
1.02191	0.986447	1.43432	2.0275	0.109829	0.15069	0.425986	1.0057	NaN	NaN	NaN	NaN	S				0.995029	119.45	320	1.95816	0.876309	0	1.36754	0.42305	NaN	YSNNANNNAKSPKNRSSSILFQRQSILSNVD	_NRS(ph)SS(ph)ILFQR_	P32047	S000005018	YNL074C	MLF3	Multicopy suppressor of LeFlunomide sensitivity	Serine-rich protein of unknown function; predicted to be palmitoylated; overproduction suppresses growth inhibition caused by exposure to immunosuppressant leflunomide; MLF3 has a paralog, VHS2, that arose from the whole genome duplication
1.15432	0.891419	1.43432	2.0275	NaN	NaN	0.640254	1.00932	NaN	NaN	NaN	NaN	S				0.908449	102.52	321	1.96033	0.853481	0	1.37689	0.824787	NaN	SNNANNNAKSPKNRSSSILFQRQSILSNVDP	_NRS(ph)S(ph)SILFQR_	P32047	S000005018	YNL074C	MLF3	Multicopy suppressor of LeFlunomide sensitivity	Serine-rich protein of unknown function; predicted to be palmitoylated; overproduction suppresses growth inhibition caused by exposure to immunosuppressant leflunomide; MLF3 has a paralog, VHS2, that arose from the whole genome duplication
0.80149	1.1129	-1.7536	-0.546561	0.955238	0.416948	0.653968	1.86166	0.45133	0.683202	-1.488	-0.311968	S				0.999012	144.65	322	0.0491533	1.26389	0.121361	-0.0964439	0.971953	-0.166359	NNANNNAKSPKNRSSSILFQRQSILSNVDPV	_SSS(ph)ILFQR_	P32047	S000005018	YNL074C	MLF3	Multicopy suppressor of LeFlunomide sensitivity	Serine-rich protein of unknown function; predicted to be palmitoylated; overproduction suppresses growth inhibition caused by exposure to immunosuppressant leflunomide; MLF3 has a paralog, VHS2, that arose from the whole genome duplication
NaN	NaN	NaN	NaN	NaN	NaN	NaN	NaN	0.956503	1.4677	1.13445	0.882624	S				0.972316	124.08	156	0	0	2.46895	NaN	NaN	1.11032	NTDLSDVDMVYSRRPSSAVSLNMALLARTNS	_RPS(ph)S(ph)AVSLNMALLAR_	P32047	S000005018	YNL074C	MLF3	Multicopy suppressor of LeFlunomide sensitivity	Serine-rich protein of unknown function; predicted to be palmitoylated; overproduction suppresses growth inhibition caused by exposure to immunosuppressant leflunomide; MLF3 has a paralog, VHS2, that arose from the whole genome duplication
NaN	NaN	NaN	NaN	NaN	NaN	NaN	NaN	1.22854	1.02567	1.13445	0.882624	S				0.918565	117.07	157	0	0	3.13561	NaN	NaN	1.06782	TDLSDVDMVYSRRPSSAVSLNMALLARTNSA	_RPS(ph)S(ph)AVSLNMALLAR_	P32047	S000005018	YNL074C	MLF3	Multicopy suppressor of LeFlunomide sensitivity	Serine-rich protein of unknown function; predicted to be palmitoylated; overproduction suppresses growth inhibition caused by exposure to immunosuppressant leflunomide; MLF3 has a paralog, VHS2, that arose from the whole genome duplication
NaN	NaN	NaN	NaN	NaN	NaN	NaN	NaN	1.16761	1.21064	NaN	NaN	S				0.999994	124.08	160	0	0	1.93872	NaN	NaN	1.18913	SDVDMVYSRRPSSAVSLNMALLARTNSATLP	_RPS(ph)SAVS(ph)LNMALLAR_	P32047	S000005018	YNL074C	MLF3	Multicopy suppressor of LeFlunomide sensitivity	Serine-rich protein of unknown function; predicted to be palmitoylated; overproduction suppresses growth inhibition caused by exposure to immunosuppressant leflunomide; MLF3 has a paralog, VHS2, that arose from the whole genome duplication
NaN	NaN	NaN	NaN	NaN	NaN	NaN	NaN	NaN	NaN	0.0663216	0.390453	S				0.758204	108.1	193	0	0	0.405732	NaN	NaN	0.228387	ESSPASPDLKLSRSHSHSAATRPTLNNINNT	_SHS(ph)HSAATRPTLNNINNTGMTTTTSNGEPNSR_	P32047	S000005018	YNL074C	MLF3	Multicopy suppressor of LeFlunomide sensitivity	Serine-rich protein of unknown function; predicted to be palmitoylated; overproduction suppresses growth inhibition caused by exposure to immunosuppressant leflunomide; MLF3 has a paralog, VHS2, that arose from the whole genome duplication
NaN	NaN	NaN	NaN	0.156008	-0.50228	NaN	NaN	NaN	NaN	NaN	NaN	S				0.90414	135.27	46	0	0.16007	0	NaN	-0.173136	NaN	LQPPVSASNTSHSSRSNSFYNLQTISPIPIS	_S(ph)NSFYNLQTISPIPISGSEVR_	P32047	S000005018	YNL074C	MLF3	Multicopy suppressor of LeFlunomide sensitivity	Serine-rich protein of unknown function; predicted to be palmitoylated; overproduction suppresses growth inhibition caused by exposure to immunosuppressant leflunomide; MLF3 has a paralog, VHS2, that arose from the whole genome duplication
0.105678	0.173383	1.9167	2.63093	0.377068	0.245374	-0.210514	-0.0740944	NaN	NaN	1.2556	2.16819	S				0.999954	204.05	11	0.815844	0.236609	0.780332	1.20667	0.0844586	1.71189	_____MCVYKSNSNNSNPSFIFERTVQEASS	_SNSNNS(ph)NPSFIFER_	P32047	S000005018	YNL074C	MLF3	Multicopy suppressor of LeFlunomide sensitivity	Serine-rich protein of unknown function; predicted to be palmitoylated; overproduction suppresses growth inhibition caused by exposure to immunosuppressant leflunomide; MLF3 has a paralog, VHS2, that arose from the whole genome duplication
1.04879	1.10064	2.24462	2.53149	0.356933	0.288536	-0.0250289	0.424087	0.26111	-0.266073	-0.230818	0.462475	S				1	182.82	14	1.69144	1.10581	0.110843	1.73139	0.261132	0.0566735	__MCVYKSNSNNSNPSFIFERTVQEASSNDL	_SNSNNS(ph)NPS(ph)FIFER_	P32047	S000005018	YNL074C	MLF3	Multicopy suppressor of LeFlunomide sensitivity	Serine-rich protein of unknown function; predicted to be palmitoylated; overproduction suppresses growth inhibition caused by exposure to immunosuppressant leflunomide; MLF3 has a paralog, VHS2, that arose from the whole genome duplication
-0.662483	-0.570722	NaN	NaN	-0.0544672	-0.416115	1.22058	1.37921	1.17862	1.25701	NaN	NaN	S				0.872797	237.6	171	1.32529	0.491533	1.68861	-0.616602	0.532301	1.21781	SSAVSLNMALLARTNSATLPSSESSPASPDL	_TNS(ph)ATLPSSESSPASPDLKLS(ph)R_	P32047	S000005018	YNL074C	MLF3	Multicopy suppressor of LeFlunomide sensitivity	Serine-rich protein of unknown function; predicted to be palmitoylated; overproduction suppresses growth inhibition caused by exposure to immunosuppressant leflunomide; MLF3 has a paralog, VHS2, that arose from the whole genome duplication
NaN	NaN	-1.53027	-1.07183	NaN	NaN	NaN	NaN	NaN	NaN	NaN	NaN	S				0.99733	124.31	183	0.954596	0	0	-1.30105	NaN	NaN	RTNSATLPSSESSPASPDLKLSRSHSHSAAT	_TNSATLPSSESS(ph)PAS(ph)PDLK_	P32047	S000005018	YNL074C	MLF3	Multicopy suppressor of LeFlunomide sensitivity	Serine-rich protein of unknown function; predicted to be palmitoylated; overproduction suppresses growth inhibition caused by exposure to immunosuppressant leflunomide; MLF3 has a paralog, VHS2, that arose from the whole genome duplication
NaN	NaN	NaN	NaN	-0.0544672	-0.416115	1.22058	1.37921	1.17862	1.25701	NaN	NaN	S				0.999865	102.28	189	0	0.491533	1.68861	NaN	0.532301	1.21781	LPSSESSPASPDLKLSRSHSHSAATRPTLNN	_TNS(ph)ATLPSSESSPASPDLKLS(ph)R_	P32047	S000005018	YNL074C	MLF3	Multicopy suppressor of LeFlunomide sensitivity	Serine-rich protein of unknown function; predicted to be palmitoylated; overproduction suppresses growth inhibition caused by exposure to immunosuppressant leflunomide; MLF3 has a paralog, VHS2, that arose from the whole genome duplication
1.01507	1.14926	NaN	NaN	NaN	NaN	NaN	NaN	NaN	NaN	NaN	NaN	S				0.992465	230.24	293	1.40428	0	0	1.08216	NaN	NaN	TFSNPFIKTTELPATSPYVSPQQSARQYSNN	_TTELPATS(ph)PYVS(ph)PQQSAR_	P32047	S000005018	YNL074C	MLF3	Multicopy suppressor of LeFlunomide sensitivity	Serine-rich protein of unknown function; predicted to be palmitoylated; overproduction suppresses growth inhibition caused by exposure to immunosuppressant leflunomide; MLF3 has a paralog, VHS2, that arose from the whole genome duplication
1.01507	1.14926	NaN	NaN	NaN	NaN	NaN	NaN	NaN	NaN	NaN	NaN	S				0.999872	230.24	297	1.40428	0	0	1.08216	NaN	NaN	PFIKTTELPATSPYVSPQQSARQYSNNANNN	_TTELPATS(ph)PYVS(ph)PQQSAR_	P32047	S000005018	YNL074C	MLF3	Multicopy suppressor of LeFlunomide sensitivity	Serine-rich protein of unknown function; predicted to be palmitoylated; overproduction suppresses growth inhibition caused by exposure to immunosuppressant leflunomide; MLF3 has a paralog, VHS2, that arose from the whole genome duplication
NaN	NaN	-1.10996	-0.241108	0.436908	-0.0616013	-0.681584	-0.326997	0.746141	0.702392	NaN	NaN	S				1	171.46	5	0.439104	0.259901	1.71621	-0.675535	-0.158319	0.724266	___________MAEASIEKTQILQKYLELDQ	_(ac)AEAS(ph)IEKTQILQK_	P32288	S000006239	YPR035W	GLN1	GLutamiNe metabolism	Glutamine synthetase (GS); synthesizes glutamine from glutamate and ammonia; with Glt1p, forms the secondary pathway for glutamate biosynthesis from ammonia; expression regulated by nitrogen source and by amino acid limitation; forms filaments of back-to-back stacks of cylindrical homo-decamers at low pH, leading to enzymatic inactivation and storage during states of advanced cellular starvation;…
NaN	NaN	NaN	NaN	NaN	NaN	-0.0894982	-0.547845	NaN	NaN	NaN	NaN	S				1	127.83	75	0	0.401308	0	NaN	-0.318671	NaN	SDDQDTFKNRISLNHSPKKLPKDFHERASQS	_ISLNHS(ph)PK_	P32328	S000006315	YPR111W	DBF20	DumbBell Forming	Ser/Thr kinase involved in late nuclear division; one of the mitotic exit network (MEN) proteins; necessary for the execution of cytokinesis; also plays a role in regulating the stability of SWI5 and CLB2 mRNAs; DBF20 has a paralog, DBF2, that arose from the whole genome duplication
0.700262	0.269512	0.050114	1.10163	NaN	NaN	NaN	NaN	-0.125116	-0.578499	0.0472341	0.47915	S				1	114.63	716	0.967711	0	0.0693296	0.530379	NaN	-0.0443079	FHLEAAGKINNHNNDSILENRMDERSSTEDN	_INNHNNDS(ph)ILENR_	P32330	S000001604	YKL121W	DGR2	2-Deoxy-Glucose Resistant 2	Protein of unknown function; null mutant is resistant to 2-deoxy-D-glucose and displays abnormally elongated buds; DGR2 has a paralog, YMR102C, that arose from the whole genome duplication
-0.290339	0.238909	NaN	NaN	0.68437	0.488412	NaN	NaN	-0.169696	-0.732644	NaN	NaN	S				0.805253	172.5	247	0.0276444	0.977168	0.449649	-0.0257149	0.586391	-0.45117	LNGKNMTNSAASLATSPTSNQLNPKLEITEQ	_NMTNSAASLATS(ph)PTSNQLNPK_	P32333	S000006003	YPL082C	MOT1	Modifier of Transcription	Essential protein involved in regulation of transcription; removes Spt15p (TBP) from DNA via its C-terminal ATPase activity; may have a role in ensuring that soluble TBP is available to bind TATA-less promoters; forms a complex with TBP that binds TATA DNA with high affinity but with altered specificity; the Mot1p-Spt15p-DNA ternary complex contains unbent DNA
NaN	NaN	NaN	NaN	-0.770609	-1.20843	1.20753	0.981508	NaN	NaN	NaN	NaN	S				0.983699	151.04	677	0	0.028338	0	NaN	0.0524999	NaN	LKPSQHYQLHPEKKRSISETTTDSDIPIPKN	_S(ph)ISETTTDSDIPIPK_	P32333	S000006003	YPL082C	MOT1	Modifier of Transcription	Essential protein involved in regulation of transcription; removes Spt15p (TBP) from DNA via its C-terminal ATPase activity; may have a role in ensuring that soluble TBP is available to bind TATA-less promoters; forms a complex with TBP that binds TATA DNA with high affinity but with altered specificity; the Mot1p-Spt15p-DNA ternary complex contains unbent DNA
NaN	NaN	-0.628727	0.747391	NaN	NaN	-0.316262	0.102961	0.594453	0.981414	0.152837	0.9559	S				0.865747	43.69	419	0.0244582	0.154675	1.3906	0.0593318	-0.10665	0.671151	TRAKVKGQMRTSRSISNSNLLEAHKKLKTFP	_SIS(ph)NSNLLEAHKK_	P32336	S000005900	YOR373W	NUD1		Component of the spindle pole body outer plaque; acts through the mitotic exit network to specify asymmetric spindle pole body inheritance
-0.390812	-0.443674	0.738096	0.145095	-0.448745	-0.839028	0.540422	-0.252052	NaN	NaN	NaN	NaN	S				1	171.78	358	0.0143059	0.344189	0	0.0121762	-0.249851	NaN	RTYTRDGLLEDPDNVSFREALSEGKDIEVAK	_DGLLEDPDNVS(ph)FR_	P32343	S000001607	YKL124W	SSH4	Suppressor of SHr3 deletion	Specificity factor required for Rsp5p-dependent ubiquitination; also required for sorting of cargo proteins at the multivesicular body; identified as a high-copy suppressor of a SHR3 deletion, increasing steady-state levels of amino acid permeases
0.476848	0.776441	-0.961697	-0.262313	0.0837921	0.0691523	0.500014	0.495146	0.197991	0.399226	-0.0558898	-0.0874628	S				0.996393	144.18	394	0.00603566	1.00274	0.402905	0.00731976	0.287026	0.113466	SLLSRKPSDNKKRSGSNAAASLPSKKLKTED	_SGS(ph)NAAASLPSKK_	P32349	S000006394	YPR190C	RPC82	RNA Polymerase C	RNA polymerase III subunit C82
-1.78433	-2.5951	-3.78136	-4.33428	-1.03934	-0.364831	-0.436695	-0.585636	-2.20543	-3.16437	NaN	NaN	S				1	240.13	83	1.91157	1.55472	0.948842	-3.12377	-0.606625	-2.6849	FKKTGFGKLQQTRRGSEDDTYSSSQGNRRFF	_RGS(ph)EDDTYSSSQGNR_	P32356	S000002408	YDR001C	NTH1	Neutral TreHalase	Neutral trehalase, degrades trehalose; required for thermotolerance and may mediate resistance to other cellular stresses; may be phosphorylated by Cdc28p; inhibited by Dcs1p; NTH1 has a paralog, NTH2, that arose from the whole genome duplication
NaN	NaN	NaN	NaN	-1.27502	-1.7817	NaN	NaN	NaN	NaN	NaN	NaN	S				0.936673	78.272	20	0	0.980569	0	NaN	-1.52836	NaN	NTSQGPVAQGRQRRLSSLSEFNDPFSNAEVY	_RLS(ph)S(ph)LSEFNDPFSNAEVYYGPPTDPR_	P32356	S000002408	YDR001C	NTH1	Neutral TreHalase	Neutral trehalase, degrades trehalose; required for thermotolerance and may mediate resistance to other cellular stresses; may be phosphorylated by Cdc28p; inhibited by Dcs1p; NTH1 has a paralog, NTH2, that arose from the whole genome duplication
NaN	NaN	NaN	NaN	-1.27502	-1.7817	NaN	NaN	NaN	NaN	NaN	NaN	S				0.936673	78.272	21	0	0.980569	0	NaN	-1.52836	NaN	TSQGPVAQGRQRRLSSLSEFNDPFSNAEVYY	_RLS(ph)S(ph)LSEFNDPFSNAEVYYGPPTDPR_	P32356	S000002408	YDR001C	NTH1	Neutral TreHalase	Neutral trehalase, degrades trehalose; required for thermotolerance and may mediate resistance to other cellular stresses; may be phosphorylated by Cdc28p; inhibited by Dcs1p; NTH1 has a paralog, NTH2, that arose from the whole genome duplication
NaN	NaN	NaN	NaN	NaN	NaN	0.425211	0.654081	NaN	NaN	NaN	NaN	S				0.879834	84.327	30	0	0.876055	0	NaN	0.539646	NaN	RQRRLSSLSEFNDPFSNAEVYYGPPTDPRKQ	_RLSSLSEFNDPFS(ph)NAEVYYGPPTDPR_	P32356	S000002408	YDR001C	NTH1	Neutral TreHalase	Neutral trehalase, degrades trehalose; required for thermotolerance and may mediate resistance to other cellular stresses; may be phosphorylated by Cdc28p; inhibited by Dcs1p; NTH1 has a paralog, NTH2, that arose from the whole genome duplication
-2.31811	-2.03446	-3.67897	-3.48233	-0.64318	0.0113525	-0.286645	-0.169668	-3.22972	-3.50893	-4.26821	-1.85332	S				0.999955	211.7	60	2.22202	0.843442	2.10757	-2.87847	-0.272035	-3.21504	QKQAKPAKINRTRTMSVFDNVSPFKKTGFGK	_TMS(ph)VFDNVSPFK_	P32356	S000002408	YDR001C	NTH1	Neutral TreHalase	Neutral trehalase, degrades trehalose; required for thermotolerance and may mediate resistance to other cellular stresses; may be phosphorylated by Cdc28p; inhibited by Dcs1p; NTH1 has a paralog, NTH2, that arose from the whole genome duplication
0.262193	0.476019	-0.201006	-0.355242	0.140517	0.361319	-0.14483	-0.0557509	-0.268156	-0.47287	-0.672561	-0.609755	S				0.99421	143.97	56	0.080885	0.258931	1.95966	0.0454908	0.0753139	-0.505836	ATKEGVVLGVEKRATSPLLESDSIEKIVEID	_ATS(ph)PLLESDSIEK_	P32379	S000003485	YGR253C	PUP2	PUtative Proteasome subunit	Alpha 5 subunit of the 20S proteasome; involved in ubiquitin-dependent catabolism; human homolog is subunit zeta
-0.603906	-0.870598	NaN	NaN	-0.505984	-0.802109	0.891696	0.0968538	-0.549536	-0.933738	0.790933	0.208661	S				1	301.43	251	0.943426	0.0733762	0.111042	-0.737252	-0.0798858	-0.12092	TAELIKELKEKEAAESPEEADVEMS______	_ELKEKEAAES(ph)PEEADVEMS_	P32379	S000003485	YGR253C	PUP2	PUtative Proteasome subunit	Alpha 5 subunit of the 20S proteasome; involved in ubiquitin-dependent catabolism; human homolog is subunit zeta
0.059909	0.223052	-0.00144204	-0.0447438	0.188528	-0.108208	NaN	NaN	0.0150693	0.161049	NaN	NaN	S				1	110.92	128	0.411789	0.0800265	0.355951	0.0591937	0.04016	0.0880593	TQSVCDLALRFGEGASGEERLMSRPFGVALL	_FGEGAS(ph)GEER_	P32379	S000003485	YGR253C	PUP2	PUtative Proteasome subunit	Alpha 5 subunit of the 20S proteasome; involved in ubiquitin-dependent catabolism; human homolog is subunit zeta
NaN	NaN	-1.22008	-0.35061	NaN	NaN	NaN	NaN	NaN	NaN	NaN	NaN	S				0.996776	102.52	16	0.492337	0	0	-0.785346	NaN	NaN	MFLTRSEYDRGVSTFSPEGRLFQVEYSLEAI	_GVSTFS(ph)PEGR_	P32379	S000003485	YGR253C	PUP2	PUtative Proteasome subunit	Alpha 5 subunit of the 20S proteasome; involved in ubiquitin-dependent catabolism; human homolog is subunit zeta
0.580917	0.412077	NaN	NaN	NaN	NaN	-0.5007	-0.270708	0.0211954	-0.0992471	NaN	NaN	S				0.760175	72.805	36	0.969724	0.73409	0.197948	0.496497	-0.385704	-0.0390259	GFIKSKRNTTQTQVVSPTKVPNANNGDENEG	_NTTQTQVVS(ph)PTKVPNANNGDENEGPVK_	P32380	S000002764	YDR356W	SPC110	Spindle Pole Component	Inner plaque spindle pole body (SPB) component; ortholog of human kendrin; involved in connecting nuclear microtubules to SPB; interacts with Tub4p-complex and calmodulin; phosphorylated by Mps1p in cell cycle-dependent manner
-0.32572	-0.248022	-0.797594	-1.02574	-0.62687	-0.890038	0.305503	-0.156526	-0.622354	-0.815936	-0.879392	-0.956726	S				1	161.48	60	1.30869	0.544275	2.84518	-0.599268	-0.341983	-0.818602	NGDENEGPVKKRQRRSIDDTIDSTRLFSEAS	_S(ph)IDDTIDSTR_	P32380	S000002764	YDR356W	SPC110	Spindle Pole Component	Inner plaque spindle pole body (SPB) component; ortholog of human kendrin; involved in connecting nuclear microtubules to SPB; interacts with Tub4p-complex and calmodulin; phosphorylated by Mps1p in cell cycle-dependent manner
-0.310486	0.0714881	0.769502	0.801657	0.422233	0.399226	-0.00129789	0.504305	0.290306	0.119954	0.760602	0.78421	S				0.966473	141.1	944	0.509673	1.21405	1.21058	0.33304	0.331116	0.488768	GEDELVKSSILSRANSSANLAAKSSTSLSNL	_SSILS(ph)RANS(ph)SANLAAK_	P32386	S000003971	YLL048C	YBT1	Yeast Bile Transporter	Transporter of the ATP-binding cassette (ABC) family; involved in bile acid transport; negative regulator of vacuole fusion; regulates release of lumenal Ca2+ stores; similar to mammalian bile transporters; YBT1 has a paralog, VMR1, that arose from the whole genome duplication
-0.702351	-0.589464	1.02656	0.578155	-0.854753	-0.522903	0.558517	0.206212	NaN	NaN	NaN	NaN	S				0.975619	132.81	955	0.0620721	0.174497	0	0.0782245	-0.153232	NaN	SRANSSANLAAKSSTSLSNLPAVKEQQVSVN	_SST(ph)S(ph)LSNLPAVK_	P32386	S000003971	YLL048C	YBT1	Yeast Bile Transporter	Transporter of the ATP-binding cassette (ABC) family; involved in bile acid transport; negative regulator of vacuole fusion; regulates release of lumenal Ca2+ stores; similar to mammalian bile transporters; YBT1 has a paralog, VMR1, that arose from the whole genome duplication
NaN	NaN	NaN	NaN	NaN	NaN	NaN	NaN	NaN	NaN	NaN	NaN	S				0.851074	91.076	1516	0	0	0	NaN	NaN	NaN	QLQQGATRETSNEASSTNSENVNKFLDLSSE	_ETSNEASS(ph)T(ph)NSENVNK_	P32386	S000003971	YLL048C	YBT1	Yeast Bile Transporter	Transporter of the ATP-binding cassette (ABC) family; involved in bile acid transport; negative regulator of vacuole fusion; regulates release of lumenal Ca2+ stores; similar to mammalian bile transporters; YBT1 has a paralog, VMR1, that arose from the whole genome duplication
0.137897	0.393197	-0.100036	0.284862	NaN	NaN	NaN	NaN	NaN	NaN	0.0535386	0.0124026	S				0.994652	222.39	936	0.716524	0	0.449676	0.17898	NaN	0.0329706	DMLQKGLFGEDELVKSSILSRANSSANLAAK	_GLFGEDELVKS(ph)SILSR_	P32386	S000003971	YLL048C	YBT1	Yeast Bile Transporter	Transporter of the ATP-binding cassette (ABC) family; involved in bile acid transport; negative regulator of vacuole fusion; regulates release of lumenal Ca2+ stores; similar to mammalian bile transporters; YBT1 has a paralog, VMR1, that arose from the whole genome duplication
-0.253584	0.0117819	1.10973	0.910746	0.366588	0.4959	-0.00129789	0.504305	0.290306	0.119954	0.760602	0.78421	S				0.999883	141.1	940	0.561305	1.19738	1.21058	0.444669	0.341374	0.488768	KGLFGEDELVKSSILSRANSSANLAAKSSTS	_SSILS(ph)RANS(ph)SANLAAK_	P32386	S000003971	YLL048C	YBT1	Yeast Bile Transporter	Transporter of the ATP-binding cassette (ABC) family; involved in bile acid transport; negative regulator of vacuole fusion; regulates release of lumenal Ca2+ stores; similar to mammalian bile transporters; YBT1 has a paralog, VMR1, that arose from the whole genome duplication
1.31863	1.26544	-1.05575	-0.0617071	NaN	NaN	NaN	NaN	1.09545	1.12439	-1.32608	-0.175045	S				0.849295	53.504	564	0.246512	0	0.108312	0.366653	NaN	0.179681	SGDLKNKKVPVDRKYSDNEDDEYDDADLHGF	_KYS(ph)DNEDDEYDDADLHGFEKK_	P32389	S000005047	YNL103W	MET4	METhionine requiring	Leucine-zipper transcriptional activator; responsible for regulation of sulfur amino acid pathway; requires different combinations of auxiliary factors Cbf1p, Met28p, Met31p and Met32p; feedforward loop exists in the regulation of genes controlled by Met4p and Met32p; can be ubiquitinated by ubiquitin ligase SCF-Met30p, is either degraded or maintained in an inactive state; regulates degradation …
-0.175305	0.10286	0.869939	0.455416	-0.581842	-0.310772	0.477462	0.139522	0.118227	0.386921	0.795859	0.458941	S				1	162.49	2	0.585261	0.103145	1.29192	0.313227	-0.0689077	0.439987	______________MSESPMFAANGMPKVNQ	_(ac)S(ph)ES(ph)PMFAANGM(ox)PK_	P32449	S000000453	YBR249C	ARO4	AROmatic amino acid requiring	3-deoxy-D-arabino-heptulosonate-7-phosphate (DAHP) synthase; catalyzes the first step in aromatic amino acid biosynthesis and is feedback-inhibited by tyrosine or high concentrations of phenylalanine or tryptophan; relative distribution to the nucleus increases upon DNA replication stress
0.187894	0.329296	0.734659	0.40295	0.426855	0.556307	0.204566	0.301622	-1.12051	-1.2395	0.835291	-0.0922074	S				1	223.06	4	1.42503	1.78292	0.330417	0.4137	0.372337	-0.404232	____________MSESPMFAANGMPKVNQGA	_(ac)S(ph)ES(ph)PMFAANGM(ox)PK_	P32449	S000000453	YBR249C	ARO4	AROmatic amino acid requiring	3-deoxy-D-arabino-heptulosonate-7-phosphate (DAHP) synthase; catalyzes the first step in aromatic amino acid biosynthesis and is feedback-inhibited by tyrosine or high concentrations of phenylalanine or tryptophan; relative distribution to the nucleus increases upon DNA replication stress
2.42334	2.1833	-0.573665	0.264616	NaN	NaN	-2.72115	-0.487898	NaN	NaN	NaN	NaN	S				0.83189	89.374	501	0.623022	0.412227	0	1.0744	-1.60453	NaN	KALEDKKKQLELSINSASPNVNHSPVPTKKK	_QLELSINS(ph)ASPNVNHS(ph)PVPTKK_	P32457	S000004306	YLR314C	CDC3	Cell Division Cycle	Component of the septin ring that is required for cytokinesis; septins are GTP-binding proteins that assemble with other septins into rod-like complexes that can associate with other rods to form filament polymers; septin rings at the mother-bud neck act as scaffolds for recruiting factors needed for cell division and as barriers to prevent diffusion of specific proteins between mother and daught…
1.65682	1.72962	-0.945907	0.340788	1.81652	1.59775	-1.84868	0.0461909	1.29007	1.35682	-0.744506	0.358972	S				0.975685	90.714	503	0.452862	0.17587	0.475997	0.695329	0.402944	0.565339	LEDKKKQLELSINSASPNVNHSPVPTKKKGF	_QLELSINSAS(ph)PNVNHS(ph)PVPTKK_	P32457	S000004306	YLR314C	CDC3	Cell Division Cycle	Component of the septin ring that is required for cytokinesis; septins are GTP-binding proteins that assemble with other septins into rod-like complexes that can associate with other rods to form filament polymers; septin rings at the mother-bud neck act as scaffolds for recruiting factors needed for cell division and as barriers to prevent diffusion of specific proteins between mother and daught…
1.52196	1.51551	-1.18142	0.266854	1.46158	1.56457	-1.27196	0.102868	1.64791	1.68167	-0.74528	0.443203	S				0.99634	159.69	509	0.328514	0.270112	0.550689	0.530725	0.464265	0.756877	QLELSINSASPNVNHSPVPTKKKGFLR____	_QLELSINSASPNVNHS(ph)PVPTK_	P32457	S000004306	YLR314C	CDC3	Cell Division Cycle	Component of the septin ring that is required for cytokinesis; septins are GTP-binding proteins that assemble with other septins into rod-like complexes that can associate with other rods to form filament polymers; septin rings at the mother-bud neck act as scaffolds for recruiting factors needed for cell division and as barriers to prevent diffusion of specific proteins between mother and daught…
NaN	NaN	NaN	NaN	0.0592169	0.0732718	0.151859	0.226696	-0.00847902	-0.00937905	0.558092	0.286691	S				1	142.79	2	0	1.33829	0.644832	NaN	0.127761	0.206731	______________MSLKEEQVSIKQDPEQE	_(ac)S(ph)LKEEQVS(ph)IKQDPEQEER_	P32457	S000004306	YLR314C	CDC3	Cell Division Cycle	Component of the septin ring that is required for cytokinesis; septins are GTP-binding proteins that assemble with other septins into rod-like complexes that can associate with other rods to form filament polymers; septin rings at the mother-bud neck act as scaffolds for recruiting factors needed for cell division and as barriers to prevent diffusion of specific proteins between mother and daught…
-0.0273367	-0.0497556	0.405451	0.43907	-0.0762651	0.0106367	0.119479	0.0742436	-0.240793	-0.28279	0.336501	0.369874	S				1	181.75	9	0.609746	0.296407	0.089455	0.191857	0.0320235	0.045698	_______MSLKEEQVSIKQDPEQEERQHDQF	_(ac)S(ph)LKEEQVS(ph)IKQDPEQEER_	P32457	S000004306	YLR314C	CDC3	Cell Division Cycle	Component of the septin ring that is required for cytokinesis; septins are GTP-binding proteins that assemble with other septins into rod-like complexes that can associate with other rods to form filament polymers; septin rings at the mother-bud neck act as scaffolds for recruiting factors needed for cell division and as barriers to prevent diffusion of specific proteins between mother and daught…
NaN	NaN	NaN	NaN	NaN	NaN	NaN	NaN	NaN	NaN	NaN	NaN	S				0.999994	99.011	2	0	0	0	NaN	NaN	NaN	______________MSGIIDASSALRKRKHL	_(ac)S(ph)GIIDASSALR_	P32458	S000003837	YJR076C	CDC11	Cell Division Cycle	Component of the septin ring that is required for cytokinesis; septins are GTP-binding proteins that assemble into rod-like hetero-oligomers that can associate with other rods to form filaments; septin rings at the mother-bud neck act as scaffolds for recruiting cell division factors and as barriers to prevent diffusion of specific proteins between mother and daughter cells
0.605968	-0.015345	NaN	NaN	NaN	NaN	NaN	NaN	NaN	NaN	NaN	NaN	S				0.973916	39.746	305	0.287251	0	0	0.295312	NaN	NaN	RYRTEALSGESVAAESIRPNLTKLNGSSSSS	_TEALSGESVAAES(ph)IR_	P32458	S000003837	YJR076C	CDC11	Cell Division Cycle	Component of the septin ring that is required for cytokinesis; septins are GTP-binding proteins that assemble into rod-like hetero-oligomers that can associate with other rods to form filaments; septin rings at the mother-bud neck act as scaffolds for recruiting cell division factors and as barriers to prevent diffusion of specific proteins between mother and daughter cells
0.55454	0.620211	0.226392	1.2524	1.11936	1.00698	-0.621524	0.435749	0.97651	0.649294	-0.91242	0.036008	S				1	85.805	38	1.27132	0.508557	0.165935	0.663385	0.48514	0.187348	SGRSKAMNTPEGKNESFHDNLSESQVQPAVA	_NES(ph)FHDNLS(ph)ES(ph)QVQPAVAPPNTGK_	P32465	S000001136	YHR094C	HXT1	HeXose Transporter	Low-affinity glucose transporter of the major facilitator superfamily; expression is induced by Hxk2p in the presence of glucose and repressed by Rgt1p when glucose is limiting; HXT1 has a paralog, HXT6, what arose from the whole genome duplication
1.05235	0.777535	-1.12141	0.0199601	0.997979	0.689299	-1.13927	0.0306487	1.03696	0.823342	-0.91242	0.036008	S				1	98.269	44	0.134937	0.108028	0.209905	0.182107	0.144663	0.245973	MNTPEGKNESFHDNLSESQVQPAVAPPNTGK	_NES(ph)FHDNLS(ph)ES(ph)QVQPAVAPPNTGK_	P32465	S000001136	YHR094C	HXT1	HeXose Transporter	Low-affinity glucose transporter of the major facilitator superfamily; expression is induced by Hxk2p in the presence of glucose and repressed by Rgt1p when glucose is limiting; HXT1 has a paralog, HXT6, what arose from the whole genome duplication
[truncated: 2,947 more rows]

## Sheet: Description
This table summarizes data obtained in comparison of control vs. cells treated for 10 min with 0.4 M NaCl. Cells were collected with EtOH, TCA or PBS-based protocols, in each case experiments were performed in 4 biological replicates
Column Name	Description
[truncated: 33 more rows]

## Sheet: Sheet2
VAN1_S25	(pSite=="VAN1_S25")		(pSite=="VAN1_S25")|(pSite=="HOG1_Y176")|(pSite=="MUK1_S475")|(pSite=="YLR257W_S197")|(pSite=="GAL11_T820")|(pSite=="PBS2_S248")|(pSite=="CHO1_S50")|(pSite=="CYR1_S241")|(pSite=="YCK1_S507")|(pSite=="MLF3_S257")|(pSite=="CAB3_S42")|(pSite=="AIM21_S476")|(pSite=="ART5_S158")|(pSite=="YGR125W_S42")|(pSite=="SSK2_S54")|(pSite=="SSK2_S57")|(pSite=="ARE2_S175")|(pSite=="RHO5_S265")|(pSite=="PKH1_S513"…
[truncated: 34 more rows]
